# Supplementary material for: Serum Proteome Analysis for Profiling Predictive Protein Markers Associated with the Severity of Skin Lesions Induced by Ionizing Radiation
Source: Proteomes. 2013 Jul 10;1(2):40–69. doi: 10.3390/proteomes1020040 (PMC5302747; doi:10.3390/proteomes1020040)
Supplement: Supplementary File 1 [file proteomes-01-00040-s001.xlsx]

## Sheet: CTRL vs. IR CM10
Supplemental Table S1. SELDI-TOF raw data for CTRL vs. IR analyses (CM10 arrays)
	CONTROL GROUP (DAY 3)																																IRRADIATED GROUP (DAY 3)
Sample Name	NI_1_J3	NI_17_J3	NI_25_J3	NI_33_J3	NI_41_J3	NI_49_J3	NI_57_J3	NI_65_J3	NI_73_J3	NI_81_J3	NI_9_J3	NI_105_J3	NI_113_J3	NI_121_J3	NI_129_J3	NI_137_J3	NI_145_J3	NI_153_J3	NI_161_J3	NI_89_J3	NI_97_J3	NI_173_J3	NI_181_J3	NI_189_J3	NI_193_J3	NI_201_J3	NI_209_J3	NI_217_J3	NI_225_J3	NI_233_J3	NI_241_J3	NI_249_J3	Irr_10_J3	Irr_11_J3	Irr_12_J3	Irr_18_J3	Irr_19_J3	Irr_2_J3	Irr_20_J3	Irr_26_J3	Irr_27_J3	Irr_28_J3	Irr_3_J3	Irr_34_J3	Irr_35_J3	Irr_36_J3	Irr_4_J3	Irr_43_J3	Irr_44_J3
Sample Num	1	2	3	4	5	6	7	8	9	10	11	12	13	14	15	16	17	18	19	20	21	22	23	24	25	26	27	28	29	30	31	32	33	34	35	36	37	38	39	40	41	42	43	44	45	46	47	48	49
C0_1967	5.342312689568724	5.555897599606381	8.650973263075155	3.8911781032980275	8.988998676483053	2.6676453741498616	5.934117677857008	9.687483759540003	7.38616920162814	5.442559196953774	9.246271817779562	7.539053058404165	11.81278621630562	6.944001201764105	8.441542714299274	5.559482754184826	8.808856895218813	6.351400076857793	6.568133067579358	9.025507981679029	7.200104603115661	7.566248877991932	12.84920159589295	6.517430204172576	10.41371097653989	6.8813484901525515	6.3710062592945285	6.153765479027843	12.177500011329988	8.289053889074573	15.594848397940405	13.460790250330321	5.121865717158334	5.899641420390967	7.457503138009907	5.188240533070957	8.793286161960747	9.398510041700929	7.87801045149866	2.897276597059344	6.612621268614606	3.133782622327813	11.795927890014504	5.650210685855182	6.877863779519879	4.84903555966097	5.844851264664179	1.7494070908287482	4.531913927059968
C0_2002	8.15933504622041	3.720064791279774	5.316857779696895	7.506980534944092	9.100166911375988	7.602175163848628	9.618144989423149	11.204756855860762	11.37985260859613	12.237257327520105	13.2388818731555	4.444969194617156	6.817761034903366	10.670353674204838	9.854394254178409	8.218034321835683	3.815855037870062	6.096777575171515	1.4486431768241679	11.281682099751926	11.168577782744425	10.20252619651214	13.097375311422526	8.748564238509003	10.863557468956015	12.334381966028728	1.4344584036584132	10.788220213522353	12.594141450606662	16.511011991724637	13.838236737123612	14.586214597595761	3.600332909896004	8.850073954599342	10.158216971634438	11.651104636107544	10.708197474910033	8.06998184285681	10.492997266652692	0.6094461734187835	11.176617523394329	5.999049343504364	17.66800749607631	7.580516343354545	10.792295353237282	8.719368016218871	11.39543331636459	2.9606266975956026	9.045131119753732
C0_3439	15.116357714720502	18.924188841574843	11.455567281493503	16.92433212515706	16.65622295663072	11.623629077935131	13.953068604160526	21.24919303479525	17.671476649759597	16.307543345571514	20.13566890285575	15.164809444053255	12.303700906180008	13.815454218408883	13.633177985579497	10.0522608613291	10.656389115306471	8.826048868045376	13.540519021865592	7.722776979283471	13.508888861173688	19.65768997701446	16.704971784381527	18.84547310797941	21.15419321167216	13.539093529336837	12.612501744401214	10.069980638339384	11.26466795993085	12.559867024611778	12.77567629695329	13.852567802769572	18.13985268060778	16.303507312955624	12.781503312625512	12.845564592493494	6.714424583001185	15.856559753241413	11.5918253968955	17.50233423681177	14.057584318156747	16.92345650418192	19.38360867246895	14.68675143936125	17.646755432476343	36.143397558671886	12.779556781841135	18.418514243686808	22.182500932351008
C0_3910	13.609688601903809	31.862477210674125	13.17165121383668	21.708229020666412	15.357697615064842	9.038710970278508	18.94084170308803	25.154406685805075	21.07273845182167	14.540087098227264	14.972906030590629	12.145936962427921	12.10057332139856	16.36493205151366	12.224971871037928	9.838611392631684	10.090092375166437	8.159124571502918	10.521515149545483	17.517537189416423	8.56579082548472	13.29007800025535	18.48939033822775	9.369873968612985	14.321932945135497	12.859855256371988	11.725550724380916	14.998570802934829	10.304279819660715	13.151862598228927	10.082533608393119	11.54405844840492	30.72214291318362	37.25052177249333	24.067516011767303	24.29120583372721	27.578242205754453	33.63373937558679	18.280594514714334	21.548894800142673	13.418460274107751	13.443804893271151	51.858442392372176	21.951435329496217	17.554057068571502	30.61105010149455	29.48207632866128	17.00358173484835	13.22848518465412
C0_4039	56.83422253618226	106.7153428589143	42.03885648826428	88.01077553221624	45.835723900264156	34.39302142376297	62.918741017357235	111.88003599046695	86.28227474607176	56.38878939584203	68.38057993463552	48.56981576107265	55.08327909734697	26.012496824176303	38.45687972913964	23.068047186642858	37.26916050129168	13.476309167078968	31.4027951172129	76.76260361828945	41.439162758406056	55.35440110031602	78.92186070892707	48.3281455764985	94.6677411682746	77.67444060627084	43.03707436859138	21.364820368959187	21.842109747647115	56.0338897728528	45.29770616515982	54.597561835500805	123.26780235698979	145.85600769837433	77.37196858392537	66.13447195761489	77.37233902395056	97.97097609665579	58.66098937779708	70.48817132184818	37.201831841554274	48.76183434220824	140.36665999107018	71.0075785857453	64.63297034066827	134.66648826357925	67.60675257561074	62.564289681495744	53.2947824316757
C0_4220	78.26027865330018	95.8438956990151	68.98016283199456	97.81963530519037	72.20203660120191	63.68964328561855	70.42392543818129	58.23672288440803	63.50680517815728	70.14370131576315	63.982309973617255	48.83641859008932	58.7786800501056	38.46287628502011	68.51589896430451	50.77889387592538	67.56442381139476	29.782531566032578	44.531284849731804	68.12496800635721	50.94253968410103	82.16349100811469	85.52862220373682	78.24658827662687	90.08274115359384	93.40636385471126	78.26331529545897	37.84882759121778	39.335246499796334	56.88418124759849	61.97280810146425	69.61575580363112	67.4954340866691	93.98989999448858	87.34437192446629	61.05886090813414	93.97685379831415	79.90584781144906	71.67341911935142	94.9008434240701	78.80668211348609	79.4274208519007	95.82058414168208	101.2651816865594	70.09840302541596	128.18887285153946	81.41235589312784	81.5426214405985	61.557284673190416
C0_4247	62.15381621279243	78.02712464447684	48.86065748470838	77.23898496262646	56.8933423491811	38.073787313323	51.64926235512573	87.73240257959517	73.14612198127995	58.2003808980604	88.36648825252361	43.49031524677094	62.42802481906932	29.03342420332865	43.458237177853455	39.48717330329853	50.91202793360588	25.593525351162967	43.39347320495789	53.423472164502996	57.714878396210864	50.854238017760075	52.51696846902412	54.84453510005529	70.81057615111197	68.02124710043266	55.42914559011225	31.886670604186786	24.837430200987463	50.638121730192715	52.256291912614955	49.292981241639296	88.57297197341458	109.89497755782071	60.607425933511756	53.27028544281516	54.69093397951344	61.73650478527587	61.51277031875558	60.9319146747306	56.102852159334944	51.75322333141199	72.91716748745988	57.91810756106644	68.0959610715873	105.27724360421747	51.87844999553978	60.82955854893978	56.936166927255975
C0_4306	35.39205424667709	52.13311127181237	20.629344675750918	54.17567706900501	30.216163742865508	23.996179806350145	37.68278636460939	57.347832959461925	66.16638391712381	40.055454001344046	38.87442445564823	27.1993435295731	36.94338027781168	20.27366087065102	24.952796081917523	16.585893714958914	27.49814149166484	16.183641200457238	28.612720206753334	37.384495335779754	30.045862341812285	31.62566996465046	44.167835183269474	27.451337819602394	43.76899393089829	41.2914935189664	25.691379432141893	16.80993416021353	17.68427653077269	39.094484160949	37.28881623361986	45.45042329567509	64.9211495692905	68.19468410346497	44.73715781772616	31.671079035501577	41.09295689582419	46.963667700204766	38.73362564841471	43.00998887726093	26.712543853879044	34.95784914732004	60.071950113216666	50.88432504801497	39.602764196562205	73.51930143204376	33.73111267947477	35.36126461258311	40.88492138053644
C0_4388	145.06947132812692	144.88661858184474	147.17862942958055	149.43998791070297	153.83982620616803	99.87856353802735	152.0058631301039	121.11001209591365	135.44470346941927	157.3333402750626	228.78604533504986	163.88903720879583	193.61869974442465	177.34466484334968	125.40891218609256	149.79904822231092	114.54394503810202	133.62913308522883	123.85082584759077	166.18924033904844	200.7660515528179	173.16975112949132	167.7182738366801	203.5498190458423	192.63169816172046	186.5063058121996	166.03263087920595	160.35179658092343	152.9228578165058	148.5255624061468	168.58411235033935	129.1496717121053	166.856078072094	159.41298045404608	112.57791671856806	152.75166499183052	93.85905729121643	122.60721343050857	157.14546480399224	177.73591566127186	171.92377382431525	178.22582504444696	162.73577227900049	130.13253920332144	183.42834599705998	147.28083563990566	113.20016220027678	181.08776427297477	184.08309098873264
C0_4685	36.32906120097712	51.18958994952519	30.93335097495953	44.47565953767988	45.152343511324275	17.73395524143497	29.94536726315639	44.16784606862688	45.086887097095435	37.38645194895142	43.12126232733608	36.39858381592913	36.555966682399855	26.301800269836548	24.70341778717556	26.317373154451744	28.00016012832734	16.96909305196816	22.607320077438203	30.35327705616327	45.83991123704822	45.529277240246465	41.71827558665197	57.71204132296695	55.51029644243575	50.74748468035798	32.52770762640248	22.814415618636712	17.555013015903164	25.26870599231993	31.653084950980322	26.583001872918015	40.58175043514449	54.46281601577316	27.767483933558378	31.27505453913728	21.628583298845797	35.22471700089526	30.821178162743387	42.94611997286637	39.782733246995214	33.325588330416565	42.08082154427158	26.047346094446024	59.45445421335806	54.39455525961268	25.144236301124828	46.92150472884564	38.92425697542191
C0_5070	15.45525270000781	15.398840948676071	6.9496038127677675	11.678684409127635	4.5048265881236755	2.23716290821307	12.190850746694675	53.21820021933748	23.975002311548753	13.361753356631025	1.505282228348444	8.092612000378162	9.857693696163436	18.43080132967081	9.74011785546113	11.268810069404307	8.190170480699715	9.241688246109646	12.403811156185085	11.949048143510625	1.911505482673725	3.894586296695527	10.825851282840137	3.4775020338717204	4.547513332161916	9.95187706372997	8.70104827801427	8.929519157431713	9.555625944616768	22.352462003042465	15.138686944545803	21.18967098554075	19.170546185279708	24.318072152083676	11.522181949845342	12.253807717431924	19.922035590825587	19.174102414715822	7.956188932788807	1.9489658438367403	2.986306947568352	1.567570527256925	17.773368268741883	13.25937852663699	6.08572456665271	4.419796542431167	9.73089429912566	13.464233574669848	13.622219278043872
C0_5750	8.78826151239488	10.692406864540423	5.524635233053532	10.392193796019194	5.394381621217002	5.163969408937295	8.179215743060068	39.90149099667114	36.04661565049085	14.266673990402625	11.458553817976808	6.472671590164281	8.642232170292901	17.377842943499413	6.051429389739271	6.679434205810144	3.479523915687799	8.29539376623949	11.831809914554219	10.285244659453403	5.284937476230711	13.832894753252333	7.5509300884984984	8.644216073710384	7.831452667943241	9.476633755853912	4.756073604183324	6.179898301121194	5.967843420213631	13.667983273994789	14.175162664519473	16.214102231761085	17.623521976486042	22.215839791453178	11.478338009441384	7.219834980457653	10.400567843281216	11.223974851402302	4.67697215394936	5.226614786595685	4.537997058624604	5.795643427467688	19.195681004997905	7.257806774053733	9.086919725950295	36.67427773437948	13.882170372643996	10.134944395125261	11.175537493589523
C0_5921	10.026125886744968	24.329744925442295	16.05947548269558	27.28207820098617	19.818182794237345	11.914755386270913	17.571367948278027	16.533012224997147	15.136640413429209	22.568526971331547	11.005968459324093	6.6002340919746985	4.914785521445848	7.2355931871314905	13.765580822864335	3.9861069142896364	11.489497213746308	5.2461045441423435	7.061787977349094	17.267513687111105	5.698776403656636	10.460377068043131	7.26017072320047	15.304170576204967	20.567263167576847	7.026204795249236	5.212769674940631	10.165116059197297	4.318093936369592	7.669604951713901	6.968290054219956	8.88968694425456	23.46489203291711	30.780425665061024	18.47153933841592	14.933250266639178	24.241081044549144	26.05410860481546	17.555905654874564	28.620269285385184	20.85366226512345	21.661314634495135	29.111491328300847	22.211601792959808	21.606878183861014	38.80933189615608	22.115702632066363	19.38615317742288	9.998981393118108
C0_5997	56.834093873717514	24.718816043373543	9.651476879741832	21.72658924096421	11.181658694731448	8.90495834915859	19.95370781979003	134.9170307022766	174.19249163575356	59.778061313377435	37.25609140108326	15.273682409779662	24.215805599104787	43.626251280216245	14.064166560677192	21.557105211299184	11.401139277538608	17.02551466876625	57.215994499889476	17.690571485477406	18.869603996082766	36.15213194719178	15.736770658676747	19.409190014899703	24.61601014739618	15.38578458497483	26.14001858727168	16.76576820243958	27.938460957193566	27.078309280133308	45.035768688120974	54.79112418892446	49.05742898021958	34.593245409560595	18.46137043718298	13.675238012515887	20.10720302450861	22.984134824571534	14.086131409993346	12.774407009005154	7.479650764292687	11.69137274127802	28.939107090828823	18.399999225979958	28.32385521053199	165.96217395084497	16.696311295107932	15.781791859494092	40.85000869732775
C0_6331	21.876420362867627	44.52192282316	26.61357705536117	39.03617656369222	26.34827974359198	22.376671324482484	30.043066782209117	62.575524601030416	39.791544428736074	61.97456416582196	25.828291268422056	16.93822158878049	19.12490570199004	22.141594279543586	23.223290483562458	14.304364553270037	25.900574351082227	9.449830905099516	19.244302252261942	27.14659041921336	17.090043288806086	25.999066277967906	24.594614292992404	18.934113961319234	20.210487132047362	16.364887645281566	18.258852037105644	14.247213380365112	9.02765062859348	16.85564830253672	16.984966269471105	14.51707241183429	75.99785605244071	117.42107021306799	42.553922399513915	43.39455874056655	62.651611987775915	93.16649328701514	43.64430087338087	31.84333183676492	15.747816979282279	15.699136007890866	90.05809993765524	40.3136589473473	23.092171783143705	22.234959367158755	69.6489069603264	25.83032622011291	17.04670699272263
C0_6883	397.32346680164187	455.40306663376543	299.5196245760099	459.3513833765155	409.4226664770771	182.3065149464573	321.04625210962683	512.8996734668864	587.6555797134356	475.93440470827045	509.54019085390127	425.853907542619	246.75282997457992	290.35961114200074	231.096256224997	234.65405085360587	344.34262854290057	109.5743062713352	254.7123456075021	121.16102693528173	395.00502698055135	603.5022264331614	396.12248102015616	642.5377967842852	557.0695600250845	381.17067762367844	357.14382533353387	115.21759373397472	136.6550041155486	178.55089830201982	359.35824469199247	402.96373253034153	686.4383314455253	382.74567087937317	254.1282590089747	337.5953348538182	164.72488993383132	328.8892641526349	328.74603690263547	606.7493864148097	362.93516848810066	553.9533210663569	389.52019098887087	361.00432727720965	559.0339599343375	891.5879510303229	220.16346476333936	417.06780500768525	568.6960591248752
C0_6924	244.6750549116276	279.22507909029684	157.2098331741969	214.88023138234777	403.12674657176103	200.9253356169443	253.42614935747613	189.1401955581629	203.35447990236133	195.84462684089902	223.97410498435812	261.903976047495	165.324237465452	256.18031611993763	249.0860373927447	150.45009469706486	210.4101091727852	170.44194880453	267.50670180417586	61.36639658713146	194.17420989473794	348.67143317191767	282.38521921058134	259.30203400660764	220.93290228825907	158.80022138994363	254.6215127068882	134.4854250307376	156.51917260090903	154.9866645886172	184.98131797045724	203.91909594462916	355.3921610502675	194.70289694331967	166.01763630195492	188.7568210261868	91.93234470306354	199.62842774795683	209.52314731412847	258.89332269214276	195.85317879705815	303.44902142679183	212.00119876720538	144.04027590489366	201.46900735235445	248.25255947352272	160.72584396969933	376.64479649310505	367.3269006732121
C0_7053	141.32213122284233	140.63876817274553	91.93991056811637	145.89389247817593	130.40871584679547	70.1672689278721	106.28776192512451	185.7334955810452	184.74446501539504	162.6074283699493	171.76589314072112	149.0564236640652	87.41190768474733	110.72408133638561	86.56688387512517	88.88538814961612	112.64507301884993	56.358588309495225	105.88197629142395	51.55488776688267	132.48636676418246	163.0108722228541	145.3588635900272	172.59570208272393	163.39061632056712	123.19522205320507	119.2931445502839	59.38600279410666	50.10548560345057	69.92374343534544	123.84165211262297	143.78536536365294	224.34052198607841	151.76212868816813	84.73311048277736	106.09012974694237	68.82617344972319	129.6059200845396	135.98945708105512	207.2575172059633	115.67557894515191	193.8916635968775	140.3174034733445	129.24108318378188	164.18744936855526	279.3846469207814	99.10440112857306	129.99581355031486	223.51485451189356
C0_7094	89.23726940469217	98.36443200175694	56.08044411677294	87.7510683256347	100.49594519845172	52.116538586889604	74.96673141924518	105.8549610003549	109.78694860179638	94.98561155904338	97.11771827524835	88.70658345372611	57.06112635583167	87.17790508648686	64.84090259406558	55.407162686696346	69.89551533145044	43.4218296315109	81.26660701655408	27.254393304196334	72.69907306471542	119.1577021114324	91.93933766801979	108.66114775928393	98.87552525861591	68.04481936178797	74.06467372727634	47.79541726643555	38.08329993501216	52.51476938528745	76.2293162291668	95.41760641306176	146.01285185171164	93.72043353268434	61.61844626862869	71.19442908715831	49.25888724719052	89.39472202412935	83.51667247581312	108.41938152438544	63.94850202875314	105.95312913668924	95.79953446682354	78.02816870133077	96.88738006369036	165.19968518099085	65.91204535106186	98.71746689916898	149.80153801234246
C0_7487	137.6456500572012	27.1100458160528	43.74095141029367	40.2927309714011	34.26730603986707	66.7380221889554	54.86982308213843	128.74050198302308	116.46085780241545	86.11309215759465	46.37039846967961	61.6626860629722	67.70703234740832	78.82355894210725	33.44152211058364	112.67359779053194	40.32842773913941	110.10636994284675	143.3050389915627	46.20901132521232	34.01011805190388	99.66490577755711	38.12871617089666	73.82850413114672	58.89084065689825	44.02211598114044	123.39834836618051	147.82576700611384	109.62584906194839	64.24396690362403	101.57408918185394	114.87803866592247	44.05679672293543	21.473112120997158	38.81153217883836	47.76916636398617	62.58011205962039	41.27423039848079	41.660986757338165	24.55068636658366	36.628115579908986	36.85144183473857	33.00599031310665	46.493721534354755	87.63581308564312	108.74454311783786	53.05418375981231	33.16430265186483	60.32807419276427
C0_7553	57.97989383049882	35.893310048093795	35.55919540200761	32.52221963591093	30.364393946908027	64.7073891620679	41.876029532604726	59.2921113738931	45.567708742378024	41.09211007128601	21.198783222214896	64.30100221442305	42.44011002943601	37.49880382141583	61.93374681556534	69.06234799798256	54.79596379909028	51.612666198424954	63.59961762738494	49.28334538908493	33.97804123618981	50.74492152395156	43.11975737516772	43.573647046192804	48.09466297273712	49.04896424546902	63.05344914844847	70.16721316631696	61.62758155878484	52.874073409782575	57.16543245255909	69.46594810939801	24.735680036313312	24.974530521685413	37.937089329441676	42.37160403786809	49.69809179180025	47.61070510450263	39.5498829173745	29.154617404045865	30.49751547772821	27.666247184241282	31.73762460069678	29.63439792532002	34.576178896899144	34.968557291248324	48.742396178129475	27.766108908536026	24.327536634703918
C0_7929	79.90317548288863	107.04304568830278	122.39415183541203	164.0507363958005	104.49813934894976	99.13938082449023	125.63583813762598	62.430622400639486	58.06550740966491	75.935274876858	43.13590925577828	91.3798237276331	62.57781422545583	29.07846766485807	71.15677194215169	77.08976140175541	110.28183955459363	60.859640844217736	70.66712553325588	124.08493585347148	93.17343008702738	60.89718972037865	101.20161380936213	68.29716268717411	109.60669567217273	121.35250832801505	83.76209722811369	71.60179756148112	64.62644941654057	71.70898618332168	64.72902322446419	74.2532429991777	65.83926751302687	83.97261358041439	104.53909632276776	143.95062302296353	118.81760042780819	98.49873076980232	111.19931755174487	144.68307728061575	162.0278020844527	116.29309407737792	114.69773941069725	153.33717193511575	92.65470955884325	67.0778930134844	113.60074226165699	110.94082407246948	42.17730315660787
C0_8176	45.16937528443353	111.91768557834186	45.918641162192486	88.02319495626767	51.64678699056121	39.98792643731377	41.39588853683353	104.5885475350529	113.94289269168043	107.91310887878178	69.93556098633238	46.143174870528476	40.13815968512598	41.385033871025854	36.634001052953195	41.88787475402919	50.298954770941165	21.115859272371154	57.41878625544401	44.930174696590115	62.219653432369796	60.756474506819686	47.46489367395854	50.97361774373492	76.2601827357162	54.78734217534324	44.64262616901804	23.95264632679776	23.107292973798007	48.93152507116816	53.87065785402675	55.078747983544424	126.71351752090881	104.8287390086437	55.664163515417755	50.77755001875873	62.00074817494075	59.87892030458654	79.55148596461906	149.88816956206807	54.85377065513032	49.15707437435529	82.63720614774115	50.91132574959573	92.00793265053775	310.4459474818541	50.08231480536605	67.71934731197481	78.23773928305039
C0_8365	49.55438240294009	51.43797040564094	35.56641251663553	48.72505620943531	35.37781364688664	32.74861126236395	39.79383626023353	75.9856348674074	68.31481963755601	62.55351971858846	96.11167524353168	38.254081907707146	55.52500698578919	58.6680620801836	35.78067241309519	56.775743425091385	40.76707206465997	28.105940570317173	42.10655701558414	39.50697120290918	53.42708766323417	47.05466104823406	43.72710998451058	40.19487003817615	45.23346128294119	43.57257546649677	40.64544009028631	30.859406248420154	34.89511387926894	46.57437942126223	49.69749114794478	52.74076527249748	72.6050667138013	58.56949722379193	52.950311086411354	37.439693828971166	48.79050593199292	44.00512811278291	44.170188567205535	49.991387210046234	40.30279937876572	45.75400214799155	56.646543452333276	42.08570595907888	55.39279043795793	114.64920662560613	36.40654901926711	43.40292025268111	55.212239833849324
C0_8618	76.17836166949249	59.9578	84.83114877545455	71.14955992146805	75.410067609183	38.88268328477916	79.07468237800384	55.391781489428816	83.40899610837839	89.06070647780983	93.45449920535525	79.81947895751178	95.16262589846032	96.18055290107164	69.31835173533393	90.61355739047228	67.08855794891734	67.89912497536673	43.83582473369822	81.44034864727669	99.49603540664646	83.90279454959281	80.5497634439763	94.68767948756856	95.03289113866647	89.57497404293895	72.26195954937306	58.621011557613976	71.85358587503609	66.9571518614666	87.632051992183	84.44060857289382	93.1195579803495	87.55838348491848	50.73222824541245	59.02592316971284	43.836246890456415	52.53815696084216	64.33342696883199	88.11928443346764	79.01164031916726	93.97355143028207	75.12927186082345	67.88265365636546	100.13145692894355	64.72473248377865	42.22381566923217	93.97426420519506	91.9089513309719
C0_8680	129.77672087184277	122.8161883866987	188.5174413534921	123.9483736280261	159.82040800050464	86.48069504881312	154.08821962974824	113.37956423782902	150.5927041731234	155.4909479361643	193.04107328455453	137.578863467573	177.06466308155842	186.46644339893734	127.85529242049405	176.77468223353057	111.42147351522715	129.89865234449388	101.8901643049183	136.82756665047447	171.95313494191083	162.13752422115076	158.56045036610286	186.99151953862096	163.08699267041806	146.2891201287754	134.78828073647477	112.50951768844212	141.08258544559968	165.66451304386496	169.5648230694186	145.502613038224	176.0574258203368	165.3104827909111	117.49521431687063	102.56901268498747	88.51369593589098	121.19115670078818	108.03195767586519	165.16127595084194	136.9228209982096	200.2177278492437	129.71622232736976	117.99808296568231	164.81840554262104	108.7747954931904	87.94030704136745	181.727056465251	177.18475026533827
C0_8790	1701.1006038006515	2086.4876477287853	2307.087309283381	2170.347348227353	2434.1358490740417	2087.4358845587035	2182.8319952417028	1737.6116151496801	2132.954419031152	2029.1187371110955	2665.3523773593256	2624.6254929846637	2412.9982360363465	2450.237044353014	2033.5023018811876	2126.557374399701	1987.6559089194495	2080.9007924647617	2022.3145210264574	2257.391055013758	2989.891003801889	2098.732545046542	2182.6479686453677	2513.4434165431594	2296.1617219440927	2392.322839124841	2420.0461481238976	2331.146681992611	2246.33636932678	2147.4089620010823	2187.616620477868	1682.9579001556087	2373.503311401338	2182.883666682197	1950.6069042615186	2317.5854077915283	1792.6407577385717	1676.6087243331503	2577.5955406099515	2553.934551713991	2458.4964328469523	2852.202100928317	1945.8573210925276	2046.1372818605644	2400.108521112337	1793.6101616393682	1729.3516812477103	2287.090612143707	2508.416990140421
C0_9002	279.49644976436855	279.55893855504917	347.2310115304692	292.1511118691788	340.4417897806665	256.58016945092845	314.4586036862698	222.68759177453614	277.1332686429884	307.56869596325583	411.7951009166348	353.074369006454	386.0679861332256	416.5968060403554	303.18156651530484	323.27509454196024	284.4128768715074	319.3372113140503	275.3979824799773	355.2509261048252	418.63608804145827	311.8038423258549	330.1129893187308	391.53219210886016	345.19136287688855	342.12483345317094	340.1102823291238	317.9201766032444	331.59799620987405	333.02031395547766	337.9962778952519	271.5785099996878	338.02059183742466	328.49179155085255	262.5553780042786	298.89739981902983	226.81328309064256	252.73994999668363	336.7930358298142	336.1955955230701	343.4538239522136	376.49744696662816	303.94210178669874	299.751986020477	333.11636547993373	260.4516981337634	250.4463287698038	342.6029384794637	388.961933746106
C0_9380	332.059813027442	453.55516649703793	406.7538823194467	419.48170759013624	469.9131959084377	216.4716803214757	364.84755992430735	347.8187719908182	357.8864580199216	385.8179656867885	269.390299165094	477.2430380245452	346.09535008978	384.73347600941594	320.61776338134126	345.39763300131517	345.12567009721545	255.74299430603378	268.9672004709744	339.82684537371136	516.2709074836819	513.9511529976102	524.4833198968344	640.3116827662358	503.707696448552	538.8096779905699	331.2429395492907	267.2559232392429	242.4663626148132	295.30173734619945	281.0380718112295	227.23750014247477	319.07089361885386	325.7771718909118	346.47110870778346	380.17266952895403	245.92587122865615	278.25053596467126	360.2478019294931	463.7189272520883	422.93382905103994	423.69097552466513	359.37081461904944	345.8866012622277	495.5762453753	390.21603905108685	304.3442789795839	468.7237760304528	387.1538778239568
C0_9588	46.56755488317868	59.30023882022259	54.808365841483706	55.52017222307372	60.54984382482197	35.506996913966475	50.91609305064948	44.67639662564575	42.603435989075294	54.604244892594515	54.87301120394978	59.12053002669249	57.13043919747275	62.60351379625537	46.26299550815433	52.08389118258805	50.63699871233747	38.829011103194524	38.87870819411937	47.187949503837125	65.20863516051116	63.09549844170449	68.65542591821233	78.46549494102176	61.38667455153028	62.440568089342676	38.38416237121571	37.061350845055514	31.860647572088396	44.610287694798316	38.38280379518608	51.35409918144714	51.21645220453027	61.69018604313292	111.63212484629446	49.65121567130925	52.70063962913893	55.683879519418234	50.419738774993895	53.20607965155249	49.145080697532705	49.81094521051246	60.11401475355577	50.86676450115233	59.85489475163139	50.96715991457829	51.39216383538849	62.959953844820085	72.75554603139435
C0_10833	3.8067657263664407	4.100168681224805	5.202414349117325	4.366920988997265	4.55120926805478	2.8896122174934282	3.4649302978578667	2.89749771506848	2.279830093363559	3.697759109742027	3.2931679085187744	3.8578744191728114	2.793472570989721	1.7537553810148296	2.8205666043884827	1.84866940792003	2.8659710322508967	1.975411776180082	1.8468019852138478	2.6182667336938765	2.617102956512747	3.834442150449823	4.021579437005742	3.5759362968956103	4.656242375149557	4.445301312267602	3.163997840992847	1.5862819911214316	2.1932963935512824	1.4515522132960779	2.6745519097856865	2.236531345870815	3.5446124877583944	3.7255632555440874	3.866215904808627	1.995060488315135	3.269259819711869	2.1502631140984034	3.83362140165781	5.9386670937250905	6.233863978410035	5.163640137619201	4.013894551531179	4.987530057543508	6.068974511914606	4.737785011283292	3.2849808425860494	3.407540396416871	1.563649876179734
C0_10963	4.128874432034973	4.006309997688998	4.49928254714369	4.804457897184162	4.052181724137685	4.499838292645297	5.5968843666290296	4.180464041353561	3.4496750941446326	3.676310122006707	3.0677373112822917	3.6108541159833347	2.7251691133013476	2.2559254984664325	4.5381677584892195	3.473206730142208	4.618737278710235	3.1871019306442316	3.483182474052	4.279261201625404	2.627722922850555	3.3513583187157825	4.920382096623437	3.1825790744602873	3.7230773663718644	3.4407628153977647	3.467460818542135	3.2594643956707388	3.1314458793619675	3.1257462670698573	3.3030031677506915	3.675544933131152	3.3081899355343842	3.747469259359786	5.404040112389989	4.026194763907515	4.671477673203812	5.268058660161934	3.854565064677145	3.5835895671788585	3.934405427962908	3.7159462141625914	4.3918469908186095	5.500559705910426	3.3498171517652047	2.4191706717707753	4.589713988649368	3.3666833586825584	2.958424847636129
C0_11772	123.77340119345378	222.23254229767906	188.56342515225936	267.33775606647794	189.82912667668234	102.5151576656751	150.79026631116858	120.31128049678672	131.39600818968435	188.99797719472164	162.89424693393863	147.602749730192	73.3169574457248	66.49832506823573	74.19771562219361	60.24986563026212	112.08664937238514	49.01794314532634	89.11402077120394	101.50221812103977	122.08028485433552	150.78981652640212	144.68782605114856	157.48576625175818	167.62977968792217	133.57993759024873	104.61452203977575	49.974956245708256	41.61304093900473	58.77773967585686	76.96686019191978	71.35810389021366	222.60295121933584	200.730268348359	148.17733873422756	142.51874501571803	107.35250146616946	177.9236635757736	181.2908011947839	343.7274515463842	242.4929607449704	240.26039739585752	199.4093440408851	225.28580284463192	249.0268796629447	326.9629228487802	159.50640096812776	193.34936623093293	147.35853965759333
C0_11810	59.33513766561326	94.95245021162452	72.39271138998703	86.7826387595631	103.10992690569321	60.89414089349752	73.1136983210958	44.90221983046815	46.869683857041274	70.50093872255157	68.60973885283893	60.05472972245432	36.7838939265461	41.257070228483215	49.68179178941231	29.93008373090776	48.321115963049344	39.79070005615964	65.10325247726308	34.69698705393541	41.92871911217089	74.11672514409537	60.73578534861473	56.42090354858811	56.88195988713224	42.61099625996536	50.918034044512666	38.397714838933965	31.241179583411103	37.06134598287888	34.60006949381356	37.501394952969235	87.80783683807968	85.0277141038878	69.90801976831915	58.06289799030605	55.001007036044584	80.19935000087789	80.98267647061135	94.15414895320326	84.35282174118666	81.39442873670073	80.56058262286733	73.99716855550675	71.71733814486838	103.43598269359805	79.59604225299803	100.34828354528535	82.7298703657573
C0_12002	31.86934966442873	41.22489558320459	40.74737704218825	45.265395026274646	41.21328203584419	27.582770781434768	27.754842679297997	26.476865123307185	26.95094854206633	39.56504890585307	31.744572588232625	30.708146650146528	21.462953686012334	21.585392690493922	21.78724525256247	18.803356134154292	27.689278296705062	22.6288132473908	28.59273812429277	22.386409950685927	23.91064875167448	35.475585236187634	30.101838979182585	33.621814604491625	34.90980239661731	25.956111796628097	26.375314249350176	21.258367377942676	19.510566198183085	18.010309604251617	22.682619964419455	21.819706097635652	38.77604213899854	37.718248802219634	35.197965723779625	26.758712568542112	24.962120172323182	35.864286695475016	37.04079166184383	55.00455882913242	44.909764595711145	44.87629557198069	38.4483198294428	42.07616699670936	44.93453709639994	58.082223167256295	34.300097271020306	38.27138480398235	33.302480769191206
C0_12229	9.036598583836973	7.1106182382430925	8.17040353674609	8.235970287157409	7.488450067004757	6.146150496517949	6.480680117559524	4.390253882457663	4.5011778995482965	7.296401415796502	20.86473293093094	7.328204140160311	6.7873607855488745	5.333798189036115	4.103867266028962	5.85530267625291	5.028721158091481	4.723702477487751	5.309268839964075	4.527819007070352	8.955882216558283	6.565195977292067	5.625142346949158	6.654584026554363	6.715198546336242	5.094705006294296	5.369644885358369	4.441580390083977	3.9930465902036816	4.1572803104911635	3.406255045051392	5.127170306199323	8.10285157435076	7.241858180662709	6.759836531430264	5.552021994501527	4.920775983515512	8.084486700435766	8.498015343539505	9.071966080711194	7.58868369912856	7.480944279529468	7.424142646051808	6.771898899423357	9.97291528402894	12.270103560341628	6.469559459570941	6.415679938292915	9.252988126574232
C0_12351	9.936140608743868	12.094950457811327	13.50055071208075	13.079387429714318	13.597658836655095	9.673272120277227	10.572846344962047	6.140068121095053	7.2742158729843815	11.47568486852362	7.971305759762324	10.786696056355428	8.753623247866472	6.384599879871064	7.113582540466525	8.14212484328387	9.809595246160214	8.25512608877088	7.6263650521835125	11.650336465633954	12.391675181212033	9.314880258106118	11.287539073558191	11.122926220539647	11.81364770779338	10.755648285807991	9.7150374063154	8.850926419495643	7.222524379073228	8.111664081410579	8.223109796657036	7.324672548188945	10.807734324993124	11.284245435055011	11.375870368317752	11.635088201523555	8.343576876073561	10.407716227638529	12.676117028060283	15.751463833814311	15.246995425178255	14.703861119606662	10.93440122128422	13.429047127641708	13.383816651763832	8.642755895839626	11.10932725018276	12.301310389155317	10.060713940206284
C0_13314	9.473066973613207	5.65387660622102	8.795288947453871	5.99520254340601	5.539550275724401	6.372253513665563	7.846746162998248	5.5157426152304465	3.8674148726312683	5.324890463741784	15.385754287499	7.665654369106741	7.114978266524959	7.218168297583204	6.128765374215433	8.430920859819047	7.150809370546632	7.461610912135038	4.747576458962367	6.218425679164846	8.689828836838965	4.732235503466006	5.924750834516825	6.167972177335769	7.762254391855745	7.845376985234987	8.719341039467288	6.320425204820338	6.222694723175014	6.034155132976469	7.484918909933313	6.523713665195555	5.236909988790085	4.8885074175671015	6.689581561215564	5.94731631450263	5.048238361505454	6.525427390626951	5.849524731633919	7.5340079425683	8.197264946374661	6.944014839276045	6.99122555440306	6.7086113636681075	7.5737347318624995	8.40095265520437	7.331112397075521	6.356947278725273	5.610726235175362
C0_14050	15.058967867967114	8.723039210706371	11.096246593265866	12.497468983222765	8.934089074793468	9.269803119261026	13.164411106112864	10.166784415343596	10.041437473585663	11.08992489300613	29.048539006045914	11.985791438536419	17.664657804575562	17.092228200369664	14.010812663327366	19.90804533057527	10.66754594709276	19.141757072855324	14.126018116383452	9.867008692324202	20.721260502468002	7.943627312547321	8.744525054810461	12.088411429840232	11.4024487246806	10.995380127241976	10.642917304279795	11.653468713201452	13.600174718137204	9.56430850990613	10.976431409780036	10.33992572451457	9.76446617979324	8.533956387439195	9.814024483182902	10.022348425242539	6.833097123557984	10.294617191646966	13.241097262995623	11.203378879144307	11.601300438585785	12.900681390251965	10.14448077719119	7.719295465186871	13.728821266235181	16.50870699024184	9.56365931747976	11.679851477183377	12.894453332712699
C0_14155	8.47433265229305	4.451165252674823	5.722628466709304	6.0338252120214495	5.262547884333962	5.928980409861734	6.240846384633145	6.290445773325945	5.433707235533435	5.623872957351256	12.014427312203885	6.056276655733781	8.709142753479062	10.330476554654046	8.13206608327308	9.013617497274808	6.236589463469648	18.401517483595267	7.487209928273708	5.85690207228793	8.64298798114646	5.059154393493816	4.814575476617477	5.859635802279196	5.982964473126043	5.888278947939525	6.656252624144723	7.710556360984507	7.697882867518075	5.398684452027779	6.051865315410242	7.826234486578549	4.62601081004645	4.119502698960175	6.035197640314135	5.05645196272068	4.151937686633193	5.996770675180426	6.670909382786375	5.457289477266639	5.885985781533654	6.3520725651931045	5.1459258201978715	4.315976270092316	6.130472213603701	8.05035065210323	6.401966503457042	5.658830975572516	6.05735062116856
C0_14901	624.1513519343991	126.25494762790348	154.83111583685053	145.48893214563742	108.55522248097886	193.3723950260438	222.5235633600655	647.6900317024323	613.145078845361	427.71839580115267	210.63356535309887	309.94647438943315	319.1297924049948	391.80123948509623	181.23019634079316	527.170140470668	200.88481962296726	491.6866943003419	644.2490404583822	211.6722625356756	176.11407774682107	416.480751100842	147.39099877207906	345.66295297876894	265.86041148796966	191.45993742576087	551.6678186928514	577.1926184163557	485.47713811834495	299.9683003967667	535.1756082210703	487.29406401348893	209.62453178726133	95.1411372663268	156.03117075763487	166.136637605086	162.54293667100387	154.5189498833939	129.24144847503914	90.21184944458096	155.34479422806314	112.5449605238133	121.72519199567712	136.51540529691653	444.8603128669096	495.64276368724705	169.1088920317437	115.29661029260356	286.2775153998949
C0_14928	495.7280741173925	145.90262527185132	177.07248162361736	183.6971003268172	135.02475067525745	247.48591967383535	265.5643611588758	447.5089724817097	395.23343914097364	332.1968431868846	189.35481164834928	284.97012324113376	306.67114563239875	335.40070668911744	209.33041315024454	416.9362501045017	229.36768182275927	509.543023301928	606.4757511482255	233.4962867805277	161.5922428908254	368.2881576520022	171.37516495333128	277.5121492597823	237.07961392852934	205.02607099784504	482.56293922311	598.7858918733001	486.81116396861773	313.4867344925705	417.4949901067199	421.0801073578584	192.55974314300082	109.91441327665518	195.82642847315574	207.7783499157488	203.0884047055781	181.07728101237194	154.9071289593859	108.2304870708397	180.98769560562815	134.7628182925645	146.07904728072202	198.0561667749836	322.62371257990355	319.16734829113005	205.6088654259439	142.58850937814546	251.06266120692442
C0_14962	294.9878360028004	163.8524406213929	252.3946817935418	194.37974215088448	169.31225361120536	362.68551255912155	230.82444644279315	253.46648305812172	217.17367326421885	203.82713768325527	126.4210499463754	197.48881292158703	218.11582788229907	214.37532819839737	204.63371813206936	258.6022482246284	205.7361251386606	388.3375445476558	394.73324292417027	208.13515043130397	116.97011959485202	249.19928646259007	196.67489719354876	171.28978615203067	167.42984554169269	177.02016712611024	314.6788078620267	414.43663502960175	379.8230808323334	246.76810021502385	268.4126832257222	283.6837752806887	136.64563176619765	128.72273798000325	234.67552535788786	236.1444850683688	341.3977217929046	232.38547607069322	219.46668739797275	146.09080663798036	151.52715365370668	198.2065477479607	176.92442305926153	252.38730761519093	188.9367047985195	159.54278115178286	277.741067544657	166.54389567216293	160.60536538703596
C0_15052	255.48424593337631	203.70600345265572	230.51560277337924	186.56673533223338	177.09648811063795	360.5154903429035	220.57838751838383	259.04750525277166	199.87877629777262	218.20559066701327	119.54404355459934	294.22654998060636	217.34817698085644	183.4561323457461	315.2089824155835	268.54360411727157	295.20906283286985	288.6034543664917	283.97387304209	263.8694260993664	170.96844156920469	227.23686905445823	232.48799699297007	194.3922748085044	240.17652753768218	257.2705722627369	285.20320142065634	290.7466647485479	283.86667566121145	257.3862746722126	258.15511941900456	271.10470322974436	140.61932887037455	142.20638906659192	234.7366766630439	227.92333781595283	301.0091975772564	246.86956032953742	225.97515651866638	158.71657167595433	172.00047752748526	180.63865196991802	183.2506830339608	198.0718074633991	183.90280215708427	132.45641374935843	270.31016568610664	164.08720391631985	133.08212415829053
C0_15094	268.5177545894965	172.18005363133506	191.019169943772	154.6716664429827	156.59697969663623	334.54584123798946	213.54687356501177	260.25178573615455	216.0366547185241	206.37062877472692	115.86891352381849	266.879456165334	216.23815975514879	189.84581789194664	301.39154511759483	267.1384265262631	273.8600811170266	304.2100146311969	314.4839129722536	226.17982788227025	139.46557778579472	218.6604965847038	201.51148802270458	178.62323333341084	198.32254583300917	210.48637829522156	286.265501701709	318.9210590273538	299.2164097519359	259.5041624049113	258.26641727856423	266.78384731183036	135.75326296650718	126.88128238849437	212.16930594926978	204.08627696470123	268.577063023662	217.7518402443632	196.5317290404418	117.76612962111386	138.9504933308423	145.51107670689274	161.86800084399925	168.32494269550912	177.28254370030038	161.68329109631284	243.15252684939216	142.47492010883175	138.77785934343828
C0_15530	65.77452846905668	47.8321402588701	59.92308347065911	54.808399627911996	45.75749887794741	79.87037848027208	66.48095856127779	59.251579363897214	49.852238436536254	50.90851237962974	31.40881883237272	55.163606602819016	54.478063428918624	41.19235728860335	75.8552715732215	62.760894354505425	71.07493584737679	71.60060423245399	73.14139091182093	70.8030670211435	37.52270413546865	49.631382280464685	55.387892800220094	40.19026715845882	49.67730541328693	56.11225617614947	65.04158092935845	71.14667739905171	67.23174099720113	65.33388276656372	58.38905960997935	63.789846664220946	55.54296095771549	39.03156303663254	70.37005277064092	65.01022683442352	81.48862106058165	66.1715747009655	52.793769960738075	39.54394376843678	51.06643784954532	43.30864243243531	52.95868656099697	62.07330304724677	44.65954216125936	34.5354860374617	75.67790231981103	47.155918082786265	49.1184521178931
C0_15802	401.413142940763	561.4608470401897	642.218423284034	761.4938897684156	531.3087451192283	520.914471981374	645.0052473365199	325.47759707837884	295.8757956786564	375.3707708259892	226.66137151573685	515.4348174890441	340.3948665592442	158.15037146635407	389.33855650434964	340.28838135549853	526.8941038725728	304.56888342946564	361.72104912815223	600.8648898173627	466.27422501264897	291.796788100783	516.2500200185488	356.4333724488022	491.4750556418787	566.8775741098024	411.2089582194529	317.0814057339966	299.4398483063313	364.48992497711123	321.7179295081274	306.7027013614033	378.949324272739	429.3412702332032	547.8405875001348	655.9609279999135	574.8121722322818	480.4910221392047	542.6387825325323	708.9186425357242	751.8074135743354	623.7284691910897	563.9312686503488	805.4390223921141	450.27161758691614	256.5031536210657	528.3045146366316	549.5721806814303	238.82043035876225
C0_15832	355.0488608081344	459.58548311967024	512.7162103764458	568.396552890845	452.0167326536931	487.10222691393074	527.5584421578056	270.96986715799324	246.31770407106603	332.18202389416456	206.7389139635762	391.6459454447894	307.6387823400914	158.0072201234053	396.67263334564626	297.6393385383176	482.92399448408617	324.29902934274946	355.53975083072186	468.56623138567863	347.89412261693707	268.28727308012	416.98266256511107	285.70201672870024	389.0610873711307	458.5417459126902	377.441951721332	336.2711715390051	317.1723378489874	360.40542126743503	285.97671671732445	292.87781603223266	303.3285446586393	373.32556182398696	487.5568677810351	569.7770329135536	541.6478947726353	437.31781440225876	495.3170162031301	482.4849368052646	579.0076539758778	454.79256107730896	444.01372041787965	582.4035491432335	338.7014250954471	218.35042860592586	508.76864631663375	472.5096102244097	220.3633003789071
C0_16006	178.31870236097885	199.0653883604676	236.63295922808558	245.1341656931017	191.89337931951238	229.18295687471866	234.60120042991707	150.58225069724884	125.5631746206206	155.67934523199384	95.6724625088235	195.1298932784499	160.3071278166418	96.06677305353735	200.242395940642	169.6176120774704	232.04277538266135	183.9481626782572	185.21157673312683	248.33926111326983	157.8577525536497	133.32940917644882	194.32701543055393	139.39895765088866	187.07288728604843	206.96138413155194	195.01102929957105	192.00063126614657	196.9641819806494	199.28425099431468	163.02720288765443	160.44936544663827	139.1899161046161	164.9255482602161	224.5654855653273	256.0306522996822	252.02947901864823	211.15623903521035	211.7716943276428	220.75761898001034	243.9819558871995	202.8459359933366	209.16236529344758	276.1048763523041	151.9287934799501	96.78384267662834	233.23281890024822	194.88488813200746	97.74432465322649
C0_16454	45.773766602925534	51.915434539694864	62.714973991996814	62.682210202683294	48.48708252173931	66.55945804148668	63.669231633368604	42.35275046195269	34.534742154417565	44.8042136822045	28.058023524159342	52.36030336349887	46.35562480505216	29.977877207301766	63.6985403893472	49.66902542567297	70.85180302834365	53.755371074013205	49.94748339268824	73.9417108457801	42.642932638181094	37.737279721333685	54.55944362647068	37.8108159378594	50.034607164855956	57.58499535686117	52.33530269776643	52.12609748392237	51.55509624883493	59.07541416494763	41.795723048301525	44.22665113936921	38.65251141820559	44.68491270526437	68.38411426650869	71.12257202561663	73.08965668098021	66.25491539311842	55.561260252066006	52.849836684713345	62.96424224689822	51.78507738102676	60.13742037128843	71.91895384404093	39.292327594981145	26.09985745424349	73.8436514660489	51.08801964183074	27.05755390593755
C0_17539	42.03910882111702	35.17151198100132	52.08822087178087	31.631404850868925	48.30350733772867	24.636393539175113	45.26290832175747	20.138859417334864	34.65384469193255	48.80088760883408	65.36124672453002	49.63914417426842	69.65443917560977	91.23289719820129	36.67814866116779	55.10894224756309	35.669364843565546	54.361672880858464	32.92753756015451	48.038565947229884	86.51843077562569	51.69050058270641	51.420561765801665	88.02326819690397	53.52043427246023	48.871875884272875	44.70962205592587	37.82801138921319	44.420793234901495	53.382201498521354	58.342926969002434	35.01456517433076	67.47022941382494	50.88080247525993	31.393695878952048	34.51626069187096	17.6038146939706	27.2489121784646	40.761882611716125	52.37430517396103	49.11483454334573	61.83865492179275	40.79510336636003	36.88749379810811	61.24721495797343	17.499940849589574	27.412006743801015	52.439917171184476	98.60944451100812
C0_17746	8.623920721923966	7.726996926153251	11.309100833768065	7.068676588077326	9.37978824189444	6.499447695042476	9.330347010049817	4.549477399763463	7.447292619375916	10.352691671815	15.511921003765124	9.944077312435532	15.191554615448116	20.511019347883014	9.428129720258957	12.123457509136351	9.056922202150378	11.899840651613706	7.647645561404452	11.519067068023988	16.87203168749512	9.776888450066343	10.5949284986899	17.715090068071458	10.409087631497579	10.045457796813997	8.90452292847122	9.200301689870281	10.203351722939852	12.021073893591444	12.6626665627708	7.7104440161278704	15.675194350852925	11.904791102949037	8.058335916222138	8.014675747693348	4.877899935164123	6.921756285207253	9.502631329899145	10.877914077624995	9.796048442594332	12.124479515829188	8.823846629306145	8.329309976497376	12.034552642953301	4.726425073339584	7.304078551689796	11.193254773627476	21.85997876524354
C0_18125	7.729739378782445	9.53093526348691	10.346693482442847	6.980897244737165	11.397293400981178	4.519108215810123	7.855380792104612	5.267061773619718	7.226009349480415	9.537932833318571	8.22734839925558	11.039557284032558	11.373915226120253	14.711864122209075	6.699023715367258	9.877784177899091	8.0523223320922	8.178934771535285	5.459061438097707	8.31951748356788	17.673565286438503	13.32590549633157	13.452458772519899	25.11051557712523	12.83385736891469	12.78374156352197	7.348657650968511	5.962428068373362	6.270327503886967	8.409787943071871	7.965482170392829	5.0068629255948185	10.867477664032977	9.021336827663324	7.754839988686758	7.171190793612985	3.420678522559389	4.5852370119192	7.536675050043225	11.967173063672973	9.37452698299398	11.33319463814141	7.447615809979147	7.100476076113536	13.84235269186243	4.128679714798962	5.853281765170037	12.302204301179387	18.32071649850719
C0_18836	1.0681651557708038	0.6494698442102098	0.9309324893157885	0.40189889084386593	0.7277121279197515	0.14596174607986637	0.3683055481754367	0.7693804212105563	0.9973183635355471	1.0411199275400242	1.2697714754078282	0.6827106188750763	0.6407004026075885	1.2593747629998864	0.45967189889734944	1.013950072135067	0.690167001605944	0.855764504140507	0.7622262532113674	0.38282193499856454	1.5998825878440024	1.1058553490739786	0.7070039612454583	1.978950421373121	0.9091228921281872	0.6051151731193329	0.7203439342659855	0.17315010179427626	0.34251596130565753	0.2777331317638633	0.6257673729641743	0.5970149737728726	0.9318114639479981	1.5205217319166255	0.37206810754460634	0.5726722083222044	0.16069206040636014	0.44290240774289125	0.5806205583819728	1.9446235027324932	0.5764250680292489	1.2894642863302164	0.39752034827223454	0.40228155178420594	1.4545347893011014	1.6091660067756564	0.3294401645452951	0.9324272870552506	1.9589708009735904
C0_19358	0.9292216241332053	0.468889378342096	0.3277597857574869	0.1752464239918159	0.42330102499750005	0.8749317885105261	0.4767740381407403	0.901949692176556	0.7062936383641129	0.5669790548198	0.16581628095953366	0.6034079536801981	0.4019751387724232	0.609628325705598	0.45090488127900713	0.8392316207439646	0.5120006881198225	0.7126295739850517	0.8369044672335798	0.49770833428406314	0.45868519549138737	0.5932305445012593	0.3107139505094603	0.7793447618099485	0.6083701657038473	0.41991956433063526	0.8937617228303338	1.0398078237552029	0.7695374083082849	0.518314576337226	0.7107126025337794	0.7001815778818807	0.31537476856606317	0.18842586525038885	0.45665607941354597	0.5670524188439782	0.5315087046247023	0.42745016384326534	0.48579664327994393	0.08280433987267811	0.04072918926730163	0.24914628278404127	0.39372655948492996	0.42731269539149597	0.7888183019827023	0.10515699114637622	0.6878769494243522	0.13269442648607918	0.4360581651751484
C0_20519	9.321350061862157	19.09732491070942	17.652545632785472	21.02510500708469	20.960584709111867	5.988897327219318	10.920235769931692	9.702749919053995	12.787027713991131	18.880072005022164	22.079598833023308	12.8211789551973	7.276244867302326	10.20792119423644	6.984532961194529	5.210602985227236	7.244510574115936	4.331842560315765	7.629206968204575	8.890320568467287	16.369745420615082	12.58667345872716	5.409122970273452	14.606067472614484	15.832192750892254	61.93248423479126	12.126921422600091	18.863093395198128	9.555750030594618	27.384676911738147	8.195081810904838	18.32986308823285	32.97049171847681	29.267815478478543	10.92545967537991	8.539982533204544	6.417495963419366	12.375517086716995	16.637810399677807	30.98375459626181	29.41694890488593	29.713846304834693	17.508009008371108	12.908323386632196	19.81890952019301	34.10995203977805	13.482506083519775	24.486247102534982	26.07992345581889
C0_21743	18.88367678544841	9.992206976687497	9.84255628378409	8.611120099480013	11.5150951509836	5.15144978182686	9.452670982016961	20.874886676142648	20.699743737263788	20.764606259453448	12.977963220774692	13.049864863013923	9.630650592417497	16.2252063109876	8.387978276663771	10.512975825015653	8.217693830529607	8.328544446231787	18.056673501934544	4.736329306521188	9.536335093021767	21.154472017049457	11.240658423588583	13.683619504532244	10.574243987667456	8.834935223793435	17.79061323802384	7.125458571380348	19.455312559969894	33.11866842124312	14.20103693251403	35.11457972187495	20.7099250860083	13.614497414066367	9.14439373977239	7.112634048983005	5.509356114095141	11.035143086896776	8.562407972517837	11.648081737292216	10.129415032035771	10.820544053946321	12.365660100988807	7.864510496414078	16.031160234888837	27.83362581268392	9.271119580641537	11.556708956464202	20.39568931288325
C0_21939	18.06076560237796	13.738811551243835	12.293928833013869	10.983449891387147	16.075849050617027	8.898773472053268	11.659392332454953	20.005360100414773	17.165925156251735	19.06524582635364	13.68973554828875	16.564366229979452	10.228034937510913	17.967784501111655	12.23350079833925	11.51875903203925	10.398853455892624	9.795082176004232	16.9315019698211	5.521005890509373	12.042587189262122	17.231490554932698	13.558333072570875	16.752404905838652	13.42103947843997	16.18466948783012	15.774264207314904	17.629465443933398	16.211098158225855	24.570707153318697	13.797072183491121	29.87105811680083	21.677513856568492	15.93719153054972	11.661487547722308	9.785071367970568	8.446579403316388	13.871539007218807	11.891696954392785	14.804401423079163	12.702500348039448	15.84249817315727	14.965653007157938	9.449523456954838	14.96356680767704	22.10177950672724	12.437687844852812	14.985395915142703	20.408571605727495
C0_22662	17.326793119263748	20.901877709518523	20.957063014969847	22.44028144227439	28.573878185619947	11.934787930140843	16.5764680734929	19.85592535309886	15.417946079687669	20.853778983595234	14.202375009491265	20.31045875114404	11.675453378160382	16.144460662660183	14.284152313389086	11.986240888530961	14.914973722510567	9.78850609897624	16.080649254974713	7.049726237935162	17.660596440024566	17.460231024447896	12.60584581419358	23.5909220513632	21.771489560983188	8.736924240369015	16.3419540593119	10.409459868717853	13.642894542118057	20.424959366185885	13.836729268490343	26.241413299774944	30.484791723553588	21.63762113303936	16.081385417361417	14.352417549497305	9.59079044590742	17.89859281437951	16.955570132072644	30.58085870469853	26.600074859727616	31.193866078524813	20.092601049451513	16.687482075491822	22.24283821905757	17.129839650988433	16.993711265579712	25.67276612383775	22.439123469864047
C0_23617	104.9730636601484	54.09152296265729	56.36280309906969	52.556350354114436	53.78545530394428	40.63482555286301	61.417685459828476	112.77046546903085	139.14559043596003	110.91979673740296	85.83962620150066	73.20052839882736	80.48856004285975	131.0828812134598	47.1413604896245	93.51515474180098	44.9905156333096	89.87454679667299	98.30989684697725	55.132496811874375	67.23796328311666	119.1272427982149	70.47088414881699	79.06461893942459	53.22887380374803	80.60406425674458	116.11698683278084	49.95649658988758	116.9522287422951	170.2865647247071	115.962068107516	142.3189991605871	111.09090711083297	66.0473260553664	43.71428100434627	46.21307961031745	34.66283505735757	52.375306363940034	49.89219605127783	53.27435332617986	56.10980301996112	57.46931600600962	52.0049762664443	55.22902553268456	96.48217455855519	124.01443743966261	48.163044673079334	58.418070080155026	137.76510246920657
C0_23741	68.2735020430568	65.50809840820956	65.40042618351077	55.264493595233525	64.57574246290127	56.14877746916829	56.24468245091813	73.97130051348131	83.56342169378216	82.19073669877132	67.36518670139245	74.93548972709291	69.17335203883253	92.92756391139062	63.54361753172109	69.34754594025883	55.76908274692255	66.03700547980986	63.81263159659437	62.908436059905576	69.91618533142635	78.88063659760685	70.19738667706764	78.06796008808331	64.10596297677279	96.97728909318973	84.35989996358137	100.99259934286299	72.32432993662843	95.20855443835733	74.97644511521165	82.57350314598138	94.29536077988514	76.33064509232796	51.401570492541445	51.07150407777579	47.240663507735135	61.57943865623637	61.75006642579129	63.46491406975699	58.85513389792937	69.69246895439709	59.59637136845473	51.38069605593579	68.24353321551186	70.8200859500622	58.96307883861366	64.09415758622389	95.17984478531928
C0_24192	35.761549478642124	36.53309398394265	35.794481564709876	33.57517215911589	36.76546488433785	25.191078659983265	30.686808878987993	39.29126980534138	42.07483735298787	42.510690594073445	34.74669457454082	37.43304756743821	36.608175384810785	45.485397065580585	31.58797393456467	34.698250567410156	30.027607087292107	29.92859715458424	32.96711558059048	32.70804850352618	38.57634384681914	42.5481020831459	32.17492573368819	39.736030644074184	35.48672114914933	35.22347893565959	41.2214503973219	29.87277651881713	30.126674571705884	42.24589272990339	36.98156518059784	40.92174665662114	48.54714081856019	42.91045968854555	31.208599969985357	28.444516101764087	24.48968746311324	31.90285137021868	31.450247577128273	37.38352194082695	36.439736235958215	34.00977975010344	36.95786980325286	31.09956372370229	39.59560165735482	37.72235447415828	32.27946678232106	39.752516517368896	47.043473317559794
C0_24519	75.5320912086494	130.3753452320277	122.50680178192006	142.29145303499416	134.6099039739317	70.77376667357997	100.11494233551551	68.66828559989062	83.99953693252775	107.59565163989241	92.51269489557836	96.633292199607	89.88853104342294	80.67957545359297	80.20469379280644	70.73119498353381	84.25801620662752	66.8133078300023	64.53832025063221	107.94616354849953	133.68625513429785	82.46979468032666	60.01522984862273	117.33461583848917	113.8792084474761	89.92609116785563	88.80697862645523	87.14113778906838	71.97677156097451	97.17870368685821	81.68569517116147	78.9556793333893	150.32433260667983	150.55318163194855	94.32181270799765	95.23388902961534	64.74661479724818	86.37180553949692	115.9511946383844	148.8654280262853	144.25435186365658	144.50625097779889	110.73470069668967	115.97982433193349	110.48384394301928	79.00649367823708	95.42492786729204	142.09344321869014	119.0072828488798
C0_25090	24.705598995232076	39.69886735993634	35.59903595824606	36.99542863251787	40.962178987568734	20.95455767226298	26.7029529326416	23.072072079897982	24.183732658055792	32.25683302089664	30.493747929966904	32.90147021363466	31.66033547980977	32.77479077129387	29.258626252316454	25.6878056578399	29.880754136646477	19.824486648483155	22.453900996670576	26.198615117194755	41.08087042116106	26.07119117525564	22.46489673014246	38.04092004287046	40.13041250518426	30.384507458255722	28.868702919851415	23.24169887052551	18.125909748213434	21.829217573037184	25.731535447154226	21.235571162462332	40.20102985331512	41.158643244450985	33.321990058253675	26.712935748811525	21.46861717681391	57.29431146838871	25.091301220901965	42.13106446677378	40.52334756137825	33.6554610077298	37.077438208134716	33.50224910005777	33.159215685855386	23.47560109596326	31.44334680790758	44.380112777078566	35.748123895319374
C0_26237	9.916931613389792	5.122185563994748	11.350864177382814	5.123698818832906	14.136396672824098	2.072961842026147	3.2567127405571465	1.9743886397358892	5.1034081759237795	8.326441348971299	26.745907714394146	11.828603780265357	17.99269226045777	30.249193300972735	10.462263202912746	13.766956067685543	9.523744831060567	4.984942640410186	8.022203400294712	7.219727365340818	26.991016722967498	4.894269067264322	8.089517315277957	14.847089578929383	10.494567218058263	10.846619149038537	15.749640626315896	1.534540346720803	4.119801138370831	20.247177587264403	12.693051492286832	4.860073121569208	17.95641061351037	12.354901914018273	8.108077733061265	3.2604616978197387	1.5688127345027816	3.310953184148918	4.080924060859023	15.801630159634701	13.72298672997076	8.690010781003167	11.835414617446494	9.223380575992385	14.580620292530055	4.435165640063836	3.7067903910984277	17.269069855433827	32.816883474972656
C0_26587	11.374366268114336	2.998089682131839	8.57958462436845	3.1455990415228268	8.588341638295283	2.037168769849085	3.3030247223967386	7.716477069037331	8.459380083206847	7.164795694987586	17.1838099988814	9.51537343166362	10.93349054319919	15.035237365402478	7.674096913452992	9.52303309432052	7.2539336651348725	2.323978860250232	11.421654159645414	2.062012415998708	11.887027820923292	8.808201888406385	7.858926856793865	9.959765795533034	9.028240127777947	40.28069541674737	13.383937227473162	15.091269161675553	8.670834189538018	12.858833681762373	10.861505605455127	16.633150211300194	6.664282825425768	4.039665819719662	7.476904837561498	1.7593619652039643	2.515168624388084	3.0586505360311995	3.2748197674791917	10.956635258751293	10.514845702075245	2.903999780508038	8.867033312981281	7.202156236121911	12.873607871059164	20.861605001986273	3.1515571974403005	11.358411519342875	17.082191078864
C0_26780	11.386733495170564	5.805314043913703	9.28015376735384	4.436710765143315	12.12537497249786	3.8064441605545163	4.53044241781276	5.643027045133071	6.627779983981684	5.8074023125904395	17.062513443164946	10.984984297217075	12.64541648971039	16.79071966216251	9.303861707062858	10.751411061988994	8.592853151849651	3.640722389437915	10.648678187399376	2.775492611816902	16.351344306394665	7.969638762921658	9.28723607125433	11.420385178265951	10.593695367669746	66.96446529178915	12.85365581889799	36.915329947949	7.742990724504861	13.623058475774993	11.208085362563631	11.144798263716376	6.515425926707279	4.976558630917074	8.413118850221592	3.2780691431059816	4.165213634537844	4.078730469098142	4.733272335856286	12.982369351023022	11.888363341442538	5.861225875010409	9.52980858795707	8.059459783094676	12.655741456931908	13.662997638196728	4.056939854337262	13.95854944593356	19.265277681474675
C0_27970	84.7262535046687	98.55961987811348	76.7034984565121	104.75728572028909	82.21999044942088	45.80869629232256	91.15883434954948	64.18917723924261	96.77764453790833	89.12768558412773	312.2963408353698	76.86171919718971	147.51387884468912	149.64003640989813	84.16388338022993	105.6396305431596	72.76491982215913	88.88816186324836	75.77089025793786	57.61114311572175	150.41424610076618	79.599646976011	52.150751617799145	69.86531064208306	63.343300459794484	83.44845367223382	107.99693706405479	79.80573978564583	59.85820115592575	191.88249864431194	97.56350727799388	68.26025021531491	103.43078902409789	101.6870391883364	65.92204791675215	64.39817825591385	39.49437939019837	80.61714813141917	89.05825779619313	91.15580248365471	66.43687322400208	113.22346596693662	74.32638190025231	64.30178522258021	131.87157192188354	314.6677696143194	50.68429057763173	100.35116955185867	160.9576356076664
C0_28157	41.44016677441156	42.938276193656435	36.492092623118715	45.412235620505996	39.30514531778635	24.117125621579653	43.56944338750256	30.865258225582625	42.16467138413946	39.57438710329291	140.09802386161476	36.84711987237355	73.45411903888343	71.9198279332167	42.43552845150503	51.12112733087653	36.66664047192596	43.07644398664735	37.429700085503434	29.218113617020954	67.00190914888172	37.33205803619616	28.360495170623654	35.189098821235774	33.74153323851934	40.07455133045927	52.04983260123297	38.30035252958007	30.76001297025877	84.38139963405952	46.468155655347985	33.46215853914168	43.1896961339181	45.52073478183255	33.691050213978244	30.580960053499442	21.43955963554052	38.628164916543376	40.39547782369961	41.29987154437072	31.674507403961357	47.85643695558238	38.26985127661964	31.381306541586905	59.23229158771945	130.78543360467347	25.408368933553884	47.54861584842336	70.76523233399469
C0_28834	34.84425857199752	33.54953180172661	30.085110065199693	41.023257226674986	32.02946278387955	21.203039773881603	36.855711314635464	25.880385896567958	32.10215770284809	31.42628197559112	102.04200844209512	29.556675063663803	51.44557497032844	52.414415608877626	34.59478363676779	39.69099501989885	30.33184466031449	36.69698612465167	32.71262594230575	25.068385289588072	52.93704778870743	31.279775627201637	27.43003547183501	29.72150019209042	28.20894159403721	22.92058946917155	36.827115806937925	26.40044885056608	25.425753430568015	57.15771471150539	35.096718557071476	28.005693095527494	32.41993757856123	33.08117342509009	26.734730102073655	27.45612253336621	19.073680088323723	29.433869452551065	34.38417520105049	32.74116841482331	25.67579656206816	31.702720414009928	30.781672875807875	26.611207749011122	47.2577808355259	100.641785761776	22.68927121095953	37.107438639622295	52.130836348025376
C0_29687	94.1133039967604	54.64907058299167	53.57568768988647	56.86257120242046	50.62307539405663	64.23707378830328	74.07875094928264	104.060050188337	100.68915486860647	70.60888005890426	46.28023609157849	59.394467177184055	58.12523179887157	55.76807420749474	53.35695736116109	72.78501805088767	51.51677749270726	72.83408477819394	87.34832233499344	56.86079529588326	46.73539819281336	98.7459077699385	62.98576209179584	66.12641237687718	50.19842704480556	12.728540465228866	75.91006527494724	25.290417505674387	103.32346295373846	76.86438463834213	82.16840306217196	110.71992663203031	40.1676325107003	40.235363454190825	49.76635139400469	68.44178296146363	60.6696000049001	59.558676577544816	55.0032261910375	43.57363473689433	47.471220079032086	46.54408085584282	48.46915847309669	55.22228795695211	75.89281564976433	84.71983206850182	52.230571593602264	46.92423960886029	47.82204594960107
C0_29844	75.27127464505308	50.48325930913182	47.924023832538474	46.21110601031466	43.942152033205865	70.22236362540397	63.07647476393172	86.23192292795423	75.29577966926745	58.81867812237861	34.75916024548624	58.751059956014814	52.78253652998614	48.85350894505757	55.37273980140656	65.00907810949342	53.387944897988476	71.2641450622492	74.64400972225253	53.39058766283896	39.39658485512948	82.97920795791418	81.41914356615845	59.90138997362705	48.57608267894502	58.34119396952043	69.68782251620028	109.01805868656183	89.30960930629588	55.93630149286995	66.70915465530334	83.29574440935211	35.72332324167472	35.99906257450914	49.836042411445774	60.52172370996213	66.65742239592957	57.472503196650095	51.0258681360555	37.58316119778339	39.22742856553952	40.29748502020891	44.976582301541164	48.006857274884034	57.65091836656811	58.42450700192456	52.75414465353294	40.25961936383827	43.34089362805994
C0_30600	91.66297363703217	68.01746977072368	66.41248572259384	69.95832609354747	57.24583132900343	78.08154625584962	86.24207055795763	93.49558813438705	88.87646842744984	75.96893320587053	29.545455121447304	70.53542775771193	62.91468554134167	45.9469577987211	63.28218251604541	70.3535843589495	70.21554506647551	77.7561952562825	84.51108846718309	75.17126920760695	48.19731572363319	88.8271971551911	75.82626825685693	72.34884308983509	65.62300197150832	33.45184980740772	75.08470554097777	58.32530642775432	99.56952194313396	68.89832973840485	83.02349450930447	97.58839881644377	55.8044827776366	52.27098641432702	67.80548377185362	81.11105229405446	79.1538676525872	72.55596414588264	68.300950656164	54.045818618189614	61.19945076084662	57.584215970088735	61.228496338116805	72.31483752201193	71.85752319224301	64.8049827574914	71.6631743660211	55.447336150737556	49.45980109897802
C0_30712	79.94064024151454	78.84914002227657	73.8107930334163	74.4844987962003	67.24448490563361	98.07097244810647	86.43346110182775	87.89044693771213	75.80297414495541	70.99955489459909	27.881664205136726	78.19079835572217	63.107927204847485	44.584748587797456	78.40911050549198	67.52760953540435	82.5545011217528	77.14493394412058	76.18706788408066	86.15522215246378	51.56229733378557	81.4563782264077	85.4507995298507	76.97908380404212	77.95209245629243	59.75848303920791	70.19946415604625	100.26710968162905	89.32180330511936	53.46831899792968	74.13841053898298	78.59064564006334	53.893196568853	59.70529106296866	79.10142521458823	89.87052581547474	97.76294937681898	82.91082929661894	81.08097370252545	63.24392493352974	65.74074209826465	67.1651907781071	70.26341237609273	78.222924224073	62.69664661559173	48.55675433491118	83.62196548227634	60.42763230136258	43.84100294048882
C0_31525	52.77674330447192	81.6200118149488	75.49995804424371	94.4510294561	74.20873232779645	71.88500017092267	81.16362638781621	53.34437699962979	46.807133427432156	51.837201278778316	19.009348477230922	57.92897454107483	44.15361728598975	26.450085204720185	59.488313387447946	44.41960343101441	71.19254976536287	48.39912060523908	49.78899369098377	79.19209054240035	49.58571077461557	50.25461460264901	52.19312408995806	64.72928518545977	77.13812176935188	40.083424908409796	46.225799677222895	55.83446261352652	54.41547213532895	34.229502103091555	51.76398980188738	50.49713733258586	50.366898703248644	63.17504567053557	75.13319784077865	85.72002202220975	76.35041875246178	66.82294535007577	78.02915025064263	80.80955300209696	88.35750587055493	74.82452492836883	71.11448527358777	92.04286968438353	52.91315492976065	33.15045863405057	76.82073719763112	71.1265040998628	30.89780082263032
C0_32058	25.603869582334287	33.09419526386276	29.697000686469774	30.653418745698936	28.13580257359861	37.92604365107501	33.0384734447326	27.524601717927645	29.415697032428664	29.84534558002935	15.807127000374043	29.051292923016813	26.583575844195014	30.982116820340504	33.81896363861324	28.449425938546838	36.91840151957603	28.73732934345	26.207544537927348	35.87955145074673	26.822598587776007	28.223985033730283	26.9382120975548	29.997866077330237	35.656286684835976	17.374219988029978	27.306260104830514	22.426750904991007	28.217807173830415	29.535652237754803	30.78658808014629	26.982641051224	30.693600897506638	28.36402549418246	36.45841133011172	36.5754900793619	40.09405296521896	36.36226149916959	33.00167958871398	29.128682391042705	31.553671933746607	29.167231716824137	34.112944509940235	72.22813337640368	26.728308281617696	15.619549974811331	39.207064675193315	27.241525073308775	29.56047011159735
C0_33210	10.202434275582382	16.621908928537508	18.31836795032157	17.612436100074262	19.722579921105456	11.226841596419083	13.276201163394047	8.852932746968655	11.337379123700696	15.082100405899663	10.416334392109597	15.399268905548636	14.159983010372363	14.579789115007541	14.091140798825581	12.05970944247504	15.243590175754052	11.293678202784092	9.302950101136517	19.04147856028816	23.454571725862966	12.010714504969913	10.079250001133742	18.07622473617566	17.83210374554964	7.234310001694853	12.763130492719133	6.581221410475653	10.539103367170192	13.627178664624115	13.282986005025359	9.555857085767489	22.198129430112143	21.423507576138498	13.804970698609443	13.110756369008584	10.47721077695622	12.962966183534215	15.231244011682627	21.562001469232094	21.254993377787276	21.068803091096992	16.617513488283137	16.96016417518743	15.522671992490205	5.264004535136706	14.721733006295928	20.534646848801298	19.685592168180587
C0_33979	5.857496380121336	13.026852833020156	9.71761834442275	11.089103854224303	20.318889798631275	7.125630723546568	8.860461123831133	5.801545537654925	8.893641987728133	9.069236900491601	11.128615047283365	11.111094040175018	8.550627041961976	10.264062514294078	11.542471948220452	10.059654307338764	12.40243694724681	8.660111044229508	7.851031787934601	8.223023224451977	12.973610107498374	14.068262696587896	12.412922634170567	17.54917296312304	15.220767792746447	27.5616720392908	12.936728093342893	19.497738841815472	10.173935138576892	17.749163924156587	13.459991517235368	18.930278882384904	9.378908011522979	10.839874682339902	9.221029367919646	8.74713999401097	4.631954069527399	7.397764341722606	9.641054899891586	15.175575548402055	11.276845014918209	20.25003447360156	9.74670186022654	7.532568818162131	11.854308301245162	15.171907976494179	7.899573988770998	13.760581074263108	15.250217037165124
C0_36737	6.465551080296443	6.352751216844587	5.390365689003588	6.8568827490405315	6.185441392963879	3.659390225103162	4.782460668162093	5.503198717470784	8.296197137777142	7.946600091617404	28.77146812167	6.113270631856055	9.772546062239341	13.593725018419317	4.854802224362027	7.2983442038425625	3.9701305143919794	6.8473362743661825	5.862091410151709	3.7830597067912204	12.37783894368401	6.914723213557601	3.83842757140878	4.503501972236629	3.9928068789852285	3.7003164400481405	7.304705171211503	3.3271963606146024	5.791697444230457	12.11200445273161	5.791622717753719	6.443554716302492	10.711865837729059	9.847623857569445	4.809850650928072	4.636395577064299	2.8666548755240613	5.535344708515317	6.927338495010841	6.2074007569239384	5.234236678787788	10.207425220499477	5.530612826484039	4.417117551908315	10.447984250404998	10.217132208914789	4.450537354010371	7.073806492714182	13.50351553670767
C0_38521	15.455712470565837	10.068918332009355	10.381434888735674	9.369748328988496	9.491528604803536	12.921226622700411	10.65203021120917	15.994311838448287	19.448477586508428	14.713509737095707	6.138049291852944	12.243363727072174	10.536659807368626	13.163705615680698	10.31955913223941	14.472828090558044	9.838402580042219	16.160281880258523	15.652312866920022	10.949982758954118	8.79185873278445	18.007245502843716	14.882167481811582	11.496297146351635	9.942099588136728	12.824882876354199	14.456081408008748	15.965236475224717	18.726777946677117	15.199969348392463	15.63126672951682	19.30394745226431	11.633159610181972	10.23540323726874	10.149458881856523	11.208533812046097	10.899803567041298	11.356591143958829	11.056524558399305	8.491548510446314	9.080961821351497	11.231857462975979	9.413146323003193	9.632580814404129	11.858760287018788	7.360606399472465	11.666638473078967	7.97093159078655	10.750612958173592
C0_39439	15.917452638524331	15.41219682246816	16.081318962765714	15.114398412669914	14.653085974463984	17.069567964626454	15.064127787641707	16.17157358470881	18.597330194418983	18.402281685976146	5.345145544118474	16.057136666739886	13.602111380107845	12.42253230049782	14.383256779028239	15.489446046241886	14.701909434177416	17.065882378510214	15.757522978138043	18.14577612009784	13.330156927570757	18.739705056860622	15.19461784573087	15.122227620352863	15.53479411019076	15.55561016397775	14.836768391936353	17.954336718464415	17.73656706600539	14.155164442421725	16.161984607830437	16.91186185345215	17.007727516919427	16.84343164704631	15.310867480629714	15.972105129127593	15.589418595256763	15.707432011105853	16.997353112191004	13.664005478111454	15.602781074707643	17.17214838560825	14.73206991693205	15.277223826947626	14.279517926275824	7.078086595299302	17.67979156116636	12.791587056450751	12.507042402388114
C0_40197	9.213339914679652	15.559749428825622	15.88298584969065	17.199120410155537	15.157430593242365	13.314669055863003	13.129730104312873	9.969369860012453	10.245610894667148	13.260009013309574	3.25613301331186	12.137142299080136	9.717382798874734	6.996238989348582	11.643044475840698	9.796474089655584	12.943352754467844	11.163762318929283	9.293645486036954	16.539754439246096	12.937172432870799	10.896972952865335	9.543393281178018	12.767904323683707	14.932817578698362	8.24998087866864	8.990540227674154	10.73221552162676	9.69550673669954	5.408586072478735	9.923976274799308	8.173201074748782	14.13694110412426	16.40644985366088	14.820584089216293	14.92169698589314	13.095095694261818	13.166893607524477	15.710608634246654	15.724897183533034	18.371659363667344	17.063855637003314	14.358352733501686	16.690455709238524	10.264489164332259	3.425709154132899	15.786396380345733	14.263504478531665	6.302009647985834
C0_42724	6.760278622480057	8.239872726056726	6.318553987473736	9.238159909343253	6.581020384202056	6.740290307534191	8.851613180649087	7.327740321473674	8.732721344368642	8.35197089510666	15.673888542243208	6.536739045339059	12.253011892548042	9.167367858323635	7.204537942907025	8.536149301233351	6.94975622956288	9.01206679528339	7.52268853946848	7.1832414354936205	8.859116288944428	6.667770337821687	6.584171157707613	5.2912752965089815	5.707708702432239	9.365580350143697	7.495284076753544	9.334936237093853	6.6537339077158855	11.894708713459467	8.241174965776047	6.746853460324073	7.252063978641511	7.028645782967768	6.922723528413074	7.540607578082403	6.4465387634526286	8.080957525101145	8.383168414449832	5.999553823131011	5.60940547994443	8.199583998071114	6.612207971909388	6.2766900666123115	8.709595411808564	15.663396621960631	6.526496145514455	6.180021292980905	8.423263975906362
C0_43753	7.084335793303551	7.874501181572771	6.4966872744273765	9.153599502000766	6.806233983796264	6.467988519545896	7.699805554240093	6.319816757215239	7.414958625325509	6.588839262998921	11.544286386839696	6.173275937064055	8.803045162949605	7.141013618993924	6.655580429990483	7.6770385008973365	6.389938931315476	9.361648060723043	6.8979708808831015	6.045015085479571	8.785040825163712	6.2336025261395	5.775579438472265	4.290735940421841	5.5958855456995265	8.844936627641614	6.161528140211866	6.619841422496409	6.329862635260882	8.269425603880594	6.326784901470059	5.510337690105593	6.2523235760777185	7.48334802828349	7.046199062124059	7.67694037144335	6.536073066601924	7.316121279097076	9.290046458358642	6.281853783751189	6.324208044639182	9.31550419815704	6.262109512205956	6.725593922326009	8.615067108860863	11.080606700359342	6.174045106205516	6.675530631721173	6.279826252316503
C0_44691	13.49152526706862	8.155899464200719	7.478747568866295	8.167092693425788	6.129487489768318	13.968841424054768	10.381234811255428	14.593016016935483	13.216711831604869	9.601516732081757	4.641055090392772	8.934857897540054	8.941657754399257	6.927579911072573	9.811597333055506	12.246866487689717	9.358065892384204	15.569714810174318	14.572275240715273	9.2007548449317	5.966302101241956	14.278742710336418	15.393806542770925	7.100592909838027	7.006439747555886	5.888075320727479	10.102776029560037	15.792970567482861	16.931669123304857	8.269181327618234	11.03726368910816	13.659013333665612	4.486004898860523	5.70661841443231	8.86989171713629	11.38694418844811	13.65475780576023	10.08347090604192	9.694329323909875	5.0097654953821245	5.622629375487309	7.0336708423365035	6.749480887351414	8.045261144821588	8.257125949831476	7.770197033555625	9.536639576493437	5.080713386525738	4.380338363841228
C0_45512	17.00282404676698	12.369811317607448	11.90600382524688	12.11701333245913	10.101994163108108	21.901149710833028	16.263481323188415	18.290688530531774	16.441877257670775	13.225434300404924	7.05832258325593	13.563484673955301	11.75936328482714	8.655713100406967	14.785670305471054	15.397074311430975	15.582828269806113	19.125212615685616	17.97615885657725	16.03932187075965	8.655143660143862	17.737307180074776	20.515864804884174	11.295429826692272	11.853853647265174	7.399394945537952	12.717935430872569	18.35705480611542	21.33893232382314	10.015860783149696	14.427691308424713	16.175444834486683	7.716875073434973	9.055471775388915	14.561055098826433	18.133080712474765	22.303891586144346	15.317312338446264	14.54520722037529	8.110713112999061	9.802398469966121	11.144985231070033	10.946606515334746	13.612292165731496	11.348371072579978	6.770218960463734	16.055599442840727	7.942132855916457	6.56733564739669
C0_46386	13.466988599882425	13.667452833372558	13.376276662607783	13.86193758666392	11.159476831733704	21.758445267398997	16.30687597503711	14.797592209523838	12.720486087747446	11.966330782008692	2.256582541449543	13.127388480602946	10.116293836822427	5.662882353144129	15.202657217850891	12.81893432004227	17.078610548310575	16.07691513381997	14.378099678917401	18.28778900798344	7.9317952807206344	13.562014419007864	17.1690533984267	11.494866860917979	13.741433708517397	6.080045309831685	9.964926321312252	13.574402263599092	16.08515748094983	6.344150170015561	12.323648292348096	11.770936255662695	7.991116147633925	9.708986069993376	16.71711916056688	19.374159510625123	23.165345373441692	15.774059327289566	15.795384061676856	9.812996885773963	12.518476777422899	11.948704082686575	12.623196489134878	16.183998800377733	9.380350175874936	4.104959876297558	18.160866099712283	8.737139454351857	4.230650379887377
C0_47112	10.156722707676476	12.2797551082461	12.048489556350376	13.029810321937651	10.401797049222282	16.668638629068806	13.422551762635681	11.538883029353823	10.577243722973932	10.06344564045762	1.2038231454249635	10.993870660041113	8.544158631120652	6.204106260137253	12.489713097769766	10.933628132033977	14.22083343131823	13.035046173638516	10.966995230383652	16.376744236574222	7.3957708469791275	10.895419616487509	12.82491594135901	9.907353805401675	12.145173818118117	6.346866473527018	8.38246383575382	8.640784273616907	12.067585393577355	6.110137157335399	10.560093015619419	9.026674092963852	7.4877133224028	9.19646527348668	14.337867501126077	16.508968925509134	17.944817336484927	13.043743507941075	13.150839777996566	9.945601745491008	12.890258908149685	11.299429585075133	11.274250752028678	15.449753427995642	7.8201937171217635	3.5546220639349166	15.501307281384882	8.48301711853717	4.6382569845183514
C0_51507	0.9298525936492488	1.3947512878645842	1.3125350540959384	1.3783383659922708	1.519817307167117	0.7329495539296235	0.40765366413387466	0.7973225389551696	1.1870288011090488	0.745583218128457	2.4207858998086484	0.7178487232947003	0.9995900805999425	1.5763228084227505	0.46249513272183773	1.083129480856483	0.3121718063338462	1.2532165176966388	1.0087020528992934	0.2409775114906916	1.6751810240609342	1.002402608626916	0.6354278302657792	0.8726853675947208	1.2406681745248518	2.9681875611635262	0.8854121193245034	0.6061356315065766	0.9534839646521484	0.9934343190894515	0.46388529851592014	0.7533240476197816	1.255534235511158	1.6387399946388297	0.6985231785547261	0.6461226882366841	0.5366052387944138	0.8290807687916862	2.110337979785025	1.8264509833017952	1.5644827218374557	2.113118108982898	1.3455134750297357	1.3000673596504184	1.324704626089644	7.622700316140272	0.6559647793473227	1.3054051785647685	1.173070611830093
C0_53423	3.362618525556419	1.5646725529803729	2.1893947228837476	1.6761192213644407	1.680345230853952	3.748880522181319	2.1327776081943375	3.815636441607275	4.140672040979872	2.751398713514955	1.4062778063300316	2.4957821715171296	2.10916220482363	2.070918456740782	2.4105227274729706	3.9077882862686724	2.293916713538623	4.919940648457415	4.360748476692609	2.0905213215339162	1.4491155599046668	4.287780785449942	4.146081399484804	1.835805246391311	1.7476412208285097	2.0310468390819287	2.9672866486529506	3.689289296445252	4.715690659649626	1.8664002451991737	3.2987761758744965	3.651266430118897	1.5207581298074453	1.616856511962538	2.5417146104571313	2.7747325741761113	3.411148008059073	2.636399577735172	2.5395830262313672	0.9684510559010587	1.3265915762992173	1.9025105633116033	1.680625723084487	2.2241745941583173	1.9296357462607399	0.8255244257261162	2.7267773022596757	1.0564554812705715	0.8056809533176723
C0_54346	4.6206926944618925	2.9577477967847816	3.755467500409623	2.830753089319216	2.9065323602869344	5.804917709843951	3.7336855703462852	5.040092525326053	5.254874125954989	4.297527849822757	1.776115079448204	4.068914019942049	3.3976846533856273	3.178013043564033	4.111532669834469	5.210578268023349	4.250265864239195	6.108392386486543	5.225226208350086	5.2738814019063485	2.6929210009782514	5.416078889385062	5.3782406666781055	3.141393298534253	3.2319821358222964	3.2540414485347524	3.880027009092689	5.008353601337745	5.683850893273656	2.6266650887759195	4.437294565390192	4.32573975225113	2.6872244561275775	2.9390661638984694	5.011088130621285	5.097657149754795	5.405004569091746	4.105805549655539	4.955775919876256	2.0020818149971014	2.8475907667944185	3.298355121524427	3.07105218035536	4.00404155297245	3.0806438723701017	1.1425700738655427	4.977589200779457	1.87113259698622	1.8803019088877837
C0_55743	4.071659124887344	4.489360678941249	4.938377057030483	5.270881180807724	3.9865769416953545	6.007245996545371	4.410633064331542	3.6771489949020237	4.974606478418314	5.034814468994893	8.334147077135224	4.293027012308932	6.054672084742706	5.698158894031333	5.157425211956728	6.011278631932998	5.373841552518732	5.979185222634629	4.29858276535707	5.576695188464987	6.174428844277466	4.290749810942415	3.740954344031538	3.2971050979430774	4.019582630034461	2.5738538519586154	4.021021454562708	3.4057641256537865	3.7946189227680516	5.86088858554453	4.635241330686665	2.7518029110401803	4.436810605263709	5.054890717833255	5.206914053043818	5.203631047427833	5.730914527672031	4.979158790708086	5.438653044416335	4.034313356421749	4.437910611123146	5.265966084254601	4.363652052412232	5.2299420249017174	4.4438949087644515	5.0106613399694115	5.054019387037962	3.795124551333066	4.4883044949869895
C0_59574	3.2309278750409787	1.8070591006768517	1.7706133795100303	2.157359514922736	1.4063744250210808	3.9214112109526096	2.6752516562803184	3.210175382042041	3.0791586932610873	2.2198956172904634	0.9842032843879172	2.2519249904159384	2.1911864273544106	1.4357388611512185	2.7587947210979116	3.524813024058039	2.645814483803077	4.597955509991924	3.9035125284995646	2.2974791869943916	1.631533006326201	3.2165171916203064	4.036649067027175	1.1551730208210143	1.2169990021364478	1.5871573805749286	2.1826941374518647	4.14433654443326	4.231535218318357	1.5394566899414344	2.5602714223755796	2.761383966441326	0.6967853735296405	1.384620469702836	2.629182453443803	3.1630668233393364	4.178669482457967	2.527327635975791	2.7059031656546018	1.0128286561884954	1.1857674094660848	1.8135560813637874	1.4778175339976305	2.3633898774903255	2.084614329799074	1.7246933865224383	2.1726018150481443	1.111538331221473	0.7231408705826212
C0_60371	4.053354518103514	2.5230173123530215	2.6537011336342453	2.4521143894969795	2.026281872412753	5.902893541668346	3.7779887323108827	4.470233568890495	4.0675107636901755	2.8324156351968424	1.2830294880045976	3.027974522066771	2.5513287191818	1.6199803165865072	3.7391682816969145	4.272153206863512	3.888008175833804	5.7050941118986165	4.963750688271736	3.4828838417475154	1.5438931665779434	4.3242634046924024	5.714425637368506	1.9026748692781206	2.1715246894658584	1.4970175714935834	2.81885685170736	4.971363726856263	5.644036895339779	1.7811731512598374	3.54721817058313	3.8224831533608237	1.2785001871690913	1.6093863664654875	3.567099596502804	4.617929384952763	6.233776191696082	3.338786343070677	3.3336169309088612	1.4476212760999434	1.856080976198437	2.4042023857755153	2.2048825719582505	3.334150594401197	2.31389279673809	1.8167428183501688	3.4530700515426065	1.3568679676038329	0.846121605529672
C0_61334	4.007717602117256	2.9426207752724096	3.1364685200319373	3.220138657995956	2.4627917246569453	7.072163321783471	4.5008665338530625	4.5596196591166835	3.7661250169863907	3.109370527834126	0.99909004505465	3.580784035357596	2.573736680954766	1.3345598696600858	4.525786889729499	4.233607819459159	4.903416228913601	5.789467767669605	4.791591057202126	4.664595299617194	1.7946740369149219	4.303850667554226	5.871450186054253	2.5164127376532446	3.099786631975952	1.4516624569037362	2.75070055779413	4.4101975521590715	5.287266952227767	1.3873526937980716	3.5920227778996305	3.403324913506685	1.2204733931428853	1.8042538868858484	4.437146379817272	5.595176821042009	7.550659247480292	4.000299507231503	3.89410477709602	1.8197235445055588	2.6343615648760137	2.866871750110778	2.705671295406935	4.243975291772001	2.3634837688336217	0.9220455543610886	4.628419817819602	1.6524059768102957	0.45169852176265135
C0_61884	3.565091781898311	3.1193043608121904	3.420145633005207	3.3112960773395894	2.6843208678405452	6.609413788770852	4.3726835646062	4.212544877103161	3.6068803195198837	3.144590108659628	0.678692265484184	3.534331472043966	2.507235607301651	1.620054757310729	4.403312028045219	4.45108021010821	5.102103207596221	5.369403430395151	4.537486189689533	5.0048436582254245	1.8008419463598229	4.107555745565914	5.384039065944044	2.6599515763617236	3.3594440708842637	1.9519538671831296	2.9286830334120753	3.726108372805097	4.897328851081835	1.9480500547090183	3.89150855897246	3.464066192495186	1.493668900185572	2.0576469926211214	4.668478788993182	5.544444179959577	7.198331040011041	4.0843005207497365	3.839407514200759	2.1638611775777195	2.828721498841242	3.050313233183524	3.077788285400862	4.6530548197182675	2.1879513116430855	1.0641492189430957	4.72919433440369	1.8952437708155585	0.8520377199219571
C0_67655	0.5088257773453699	0.27483305336530023	0.5246189804393737	0.2695069924937276	0.6442140518279615	0.5595334906334645	0.4574233692786198	0.5562015696712637	1.0305780748586033	0.3924323915009346	0.36396241616079494	0.39348223763971474	0.24231387737077995	0.21115654864170028	0.34411847368457793	1.0995558699690617	0.29340006625885046	0.8791909014373573	1.3624774560446116	0.16203902988699945	0.23934235508394539	1.2958332878667143	0.7103118330263969	0.5132157411555417	0.5216752768611204	1.0062534250588198	0.7608641533552456	0.5291121048530744	1.5381943462085812	0.8088198842072931	1.02762146276593	1.4014161188066843	0.2350763596337796	0.30639597943231006	0.4217419255865669	0.5006577128613587	0.6978469433301187	0.3079023976663511	0.6623885769478028	0.4682335543626059	0.3964465460591587	0.8444684940090771	0.34355098409975743	0.5961246113607103	0.462670537512658	0.43187317656006113	0.30717973519003533	0.3227103459620075	0.5410812805935863
C0_69127	1.1386796824068832	0.2925882599126563	0.7461449819136242	0.30112464645983367	0.38058310158037195	1.6180858113004517	0.7791760331081587	1.3590004804172773	1.2931164028501478	0.9099760089344316	0.15499977022537914	0.8282647487138225	0.4220250010284608	0.5332129289833629	0.944004437851192	1.4385221877747378	0.9642190308374221	1.9350325042256196	1.6886909858177752	0.7775312115465824	0.2746993280323017	1.4999069354237833	1.7915416825504233	0.5862506967793105	0.5801430773536349	0.7533490071421151	0.9845000290190286	1.4714458863140616	1.911115100020152	0.5648390943551054	1.1911113612268163	1.2210205455170549	0.22866360734963165	0.21089971971927854	0.9318162940283068	1.0317893702125205	1.7981793608815	0.7634103810077156	0.8754969156724428	0.15741793635412912	0.26751613708083294	0.6555008036765034	0.41440343411581165	0.844432263805997	0.41943911333673756	0.019366064188927966	0.9644439312574405	0.15280615689408397	0.16376847676711007
C0_70004	1.2353420883525	0.6317445010146651	1.1984882297835528	0.6538811231185209	0.6371014522091069	2.1603997707397027	1.00474768698746	1.436129088679322	1.2479668747491393	0.926907455345752	0.1134633166121071	1.0335334319591345	0.780711307046869	0.47865657649503635	1.2870669745868017	1.544471627799327	1.3783514933689924	1.911924150362151	1.5341756523903523	1.455324931431352	0.41256634370739564	1.4159500510761518	1.7393762556489247	0.6251758398539915	0.7503987912714077	0.614484820363829	0.842688769162875	1.5781810789504205	1.7374962956582682	0.5212817774668692	1.2137776225689783	1.022361409728117	0.4600086900110874	0.4657714401403669	1.3492531535659298	1.3443303693353919	2.1672046864471115	1.0873331311486076	1.1937607184047898	0.41940486881891575	0.5848468440999419	0.742216962787964	0.6739508252385602	1.327189595793948	0.600363140667	0.24058276639967577	1.4087443363629264	0.233940318364455	0.226006864282963
C0_70701	1.113721596503916	0.8275293114689097	1.1551232083414507	0.8464820759784126	0.6993454516642759	2.0103793727313564	1.1675252194285628	1.389685076657795	1.282875853130588	1.1034804308322408	0.7512327850911755	1.1108731867212926	1.0578974941767827	0.8056546283716541	1.3367653581104584	1.5845767537780129	1.52767549928846	1.9617989806849851	1.5016595578526937	1.6224911996206275	0.8055054451190797	1.3092239006851725	1.4792748421521351	0.6219638476826742	0.8910451078928383	0.5341188620869366	0.9716804441951779	1.2921738629303137	1.4149245178626366	0.7890167929409486	1.2779022049461835	0.9038390763240733	0.6263981792903691	0.7232453426320368	1.4212183048666687	1.56101976730707	2.1139531818220307	1.2237760060413987	1.2582116997421087	0.6131304436065547	0.8281875453367222	0.8855806526224435	0.8600966386902952	1.4591823305421032	0.8343452559175799	0.6147219262163445	1.4273694547743374	0.4558019599091348	0.3401431869435038
C0_76935	1.28201693649957	1.0342584185800776	1.0246655252438353	0.9608161382169871	0.7156650098982983	2.6511592945347107	1.6552060556994443	1.6683095416691787	1.4111026438751562	1.0830632832641478	0.2978471762121665	1.199852835359759	0.8384470988515126	0.4876445087042548	1.5822301401938688	1.6369565415263745	1.8633910948939263	2.181839242579295	1.7791951188436776	1.7548120517284558	0.45484131792979066	1.563039231986542	2.0915356272909005	0.8413522421943594	1.0733581803625896	0.7190362643805489	1.0891717845889848	1.4716715356531098	1.971672413959832	0.9294783427649609	1.6570679550563234	1.3554258936046577	0.35996625442839325	0.42913086540209183	1.3543293606495472	1.9318534134723098	2.692327120176064	1.296475233950806	1.3196711526682536	0.5973936608272309	0.8038450009318343	0.8646151296447718	0.7880767873356707	1.3808566797561885	0.8069937734639958	1.0191959641217263	1.4455464347664566	0.5179071336931116	0.43669558615170945
C0_84048	0.44144989023349457	0.1914354233401959	0.2573945077166127	0.37793773806100134	0.146830982769832	0.7080465504581889	0.3112392306088713	0.5108539021881474	0.5906080522191112	0.39814092732232337	0.7238833188120205	0.29124851631738324	0.4546197430548917	0.43785648029095414	0.4044336675361131	0.6539464434025669	0.3920084016094084	0.8406685418120657	0.7150812462514975	0.21889274251443103	0.36072340718025353	0.5799205059413443	0.6040632809271466	0.1324090050807031	0.17293415603541196	0.29603431523359697	0.43459350937658503	0.5948187580001814	0.739137854057691	0.7114414263429972	0.6271499264587584	0.5766750284664651	0.19544566421942816	0.2089107898115923	0.24694776644921715	0.3403532220967008	0.5162698145436774	0.2689085080839942	0.29321528187926205	0.12046097882380907	0.08989198189351032	0.2682575003932001	0.13015597840328397	0.24699769691563428	0.41996497388900245	0.318195915214186	0.3575903678121741	0.16876881835466073	0.4547196267538126
C0_84753	0.48851243302569974	0.2910504432746786	0.3899872584353706	0.3519539607741117	0.27632567212395576	0.8877695772129277	0.3685428627513083	0.6123652187999602	0.4803798134650566	0.5072579368808541	0.4967529163795017	0.3077795833787348	0.4080644542463418	0.3440948613768188	0.4986253473213801	0.7544578800719297	0.4873656485638066	0.9026419766719623	0.7309321276659098	0.35987619684662003	0.3242760498115164	0.6021761300040509	0.6998124799093844	0.1995354602732242	0.2553999606050066	0.18627439627506437	0.3930353261284311	0.6636298664381084	0.6753996538798601	0.5738819005180587	0.5399432746877084	0.3939077763600818	0.2166401477406869	0.26553820871806905	0.3630432194959918	0.47926306973026545	0.7309320388359583	0.3349815475136139	0.504360434440882	0.13768735989455044	0.18275290587439452	0.34534977080411494	0.2282238588962619	0.3569933898234311	0.3043788027472339	0.3884649642679562	0.4282262198248376	0.2191786764718524	0.20116454871647924
C0_85644	0.4177277820613441	0.4287914315078605	0.4609945719826446	0.4412529856927836	0.1738681352676272	0.7556936440542996	0.5181494769692158	0.5161216169940971	0.40799218770592466	0.5099813667936162	0.40042372818318533	0.3857215297592854	0.3600867288533136	0.27194513832792505	0.4861668308280016	0.6569768088249887	0.649508199524172	0.8567197583959767	0.5722760368714782	0.5644810675354597	0.2761826630255239	0.46483749039133987	0.6745588049149636	0.2814132368931712	0.3216071226004104	0.14280333227890424	0.2973220102768446	0.5418829540513503	0.5895517994168058	0.3769615378381272	0.5901029251257667	0.30744846563108363	0.1978708991091199	0.27305058822424627	0.4914399563237286	0.5281989758466845	0.8964263880627148	0.47302159920527403	0.5292984298329133	0.21040070638638803	0.22555107030236846	0.34199152109721576	0.34902579200495676	0.4581964662048935	0.25389394376554575	0.21652822869234262	0.5602404971170961	0.24036982570001708	0.14287370620234421
C0_88535	0.2787822851752977	0.5570491575759968	0.5293597088254075	0.6400903039730464	0.5373388244990374	0.7231644256968122	0.4709004276674203	0.33207356240582636	0.23896252590891842	0.367179701353079	0.19735219153747424	0.3888117413962366	0.2921627613323215	0.1462336787888037	0.43857565812602767	0.32029355013038185	0.55775834402847	0.6122994017116098	0.3948856911169739	0.541540130697025	0.2984320248092783	0.4989879179292465	0.37017037835620603	0.45002970435738177	0.5547933912460731	0.33339831840702594	0.2918943804478055	0.49957523942773313	0.2813718974493091	0.10353447150796703	0.31614856651514606	0.21317017370835778	0.3625904470636232	0.31424370199135393	0.4592831939742416	0.5482198810612224	0.7071044032431322	0.38057512464073157	0.76270142487537	0.991388659477786	0.5417741345702957	0.5331868961994901	0.42483833436473056	0.589761656500735	0.36150195786595757	0.3261092684252416	0.4238247825162992	0.46520846308092006	0.2458657610614132
C0_91847	0.38914914291339425	0.2037441207687066	0.2619924094409868	0.25032177975170333	0.1756838959700079	1.0007450638032427	0.5906751674514854	0.48681497765773546	0.34527091852064695	0.1863871931561389	0.10722890982993707	0.3237224950136812	0.2427829144872509	0.06860530027179357	0.4043843549559756	0.47120812104454757	0.5796043621018229	0.7368840211546569	0.6454727101095525	0.46244620345457055	0.14380389496647522	0.5570579045445117	0.7219668301013953	0.2113685100455981	0.24050253583129716	0.15703736257340017	0.19261360882879122	0.38501618912296953	0.6550838193466005	0.16876330850512808	0.500221294793319	0.3541349325520904	0.1862272532680675	0.16021042978926614	0.3871504138334157	0.577128797508869	0.9713855488025338	0.337123978059529	0.3672317455134902	0.1578831581022625	0.21565115996562104	0.2760707109555609	0.24912771519904084	0.4312402456828917	0.31734293001163894	0.06756922599310838	0.3842558673504803	0.12469767495728011	0.12909226952868502
C0_92809	0.30491097679111756	0.23148961343520888	0.31944098208575505	0.27831487056860904	0.12649574536722202	0.8892234666416008	0.4942873479719536	0.45726741603019766	0.3534006022994319	0.2885705176469209	0.07808546116791074	0.36983349153326983	0.21560788252734384	0.15767570959532334	0.46348841700560345	0.405521576840049	0.6758249215171942	0.6537943615812604	0.47665075471817003	0.45547383389515916	0.09944313666568957	0.35856493624507363	0.6250120717745122	0.14815438627115063	0.24099245077593118	0.1377548261514101	0.24944408151716613	0.3841792657603384	0.4989054761225764	0.2680367467950837	0.4346456576007691	0.21504201686719873	0.1194025767594725	0.09881209584964595	0.4173902563999586	0.5607302774314972	0.8771896419501249	0.3175513745631756	0.30567407979680994	0.10211331933814018	0.0710686421474997	0.148836190688345	0.23795746088498818	0.4497773429708344	0.22089325767457127	0.16215004254183257	0.4434783894863653	0.1331420685611521	0.0972342427403306
C0_96593	0.013640196474969675	0.10772187121595697	0.06791172533108147	0.11743797653581407	0.10387779165277325	0.05443178966399312	0.05160762127206006	0.052333182023655715	0.06648304626664794	0.1167813734552725	0.013716969126565342	0.11732571042347598	0.06173908031412184	0.08388034764514807	0.04557959510355005	0.03436814006942016	0.04956864126410012	0.015507003198639851	0.009559342265726075	0.047732348683620855	0.09435256256008093	0.0985811373414521	0.007573517647119692	0.12049788116114891	0.09206184448321815	0.09902978153545142	0.0876679778463523	0.09546392706592237	0.02543357865750456	0.06897124331743677	0.00440845640376413	0.07718068640849624	0.10485852727860119	0.10652741262410335	0.031708690083518086	0.10164551039523628	0.025306094205483454	0.06597182624808222	0.134866939756279	0.13275172800078072	0.07441865283529511	0.009478703563233357	0.07206774696912269	0.035247426697413854	0.1299818413735148	0.13454837238871079	0.05921271609785118	0.10086460339373772	0.1247536877050026
C0_99436	0.14635228677229106	0.04495324090827958	0.02958416295441444	0.09423019544116207	0.05395984985538445	0.24325803128247817	0.08620545557507095	0.20457135641465424	0.17722695740673078	0.11454495490897078	0.15258449315703448	0.08363997201655447	0.1394287027009677	0.1498470495065693	0.06853270598361683	0.15326072337968114	0.13821680948554074	0.26237955605556257	0.22248960846507762	0.025669480263156724	0.1001693334275369	0.18265021625349565	0.22756042549193314	0.1402736263797079	0.06659472900856568	0.10259997165144305	0.13773957861303887	0.24712403244373277	0.19366997962774682	0.1467270835773035	0.23476777044227826	0.22925599841315553	0.16909892469951235	0.159351951429764	0.07084243218721321	0.12195037215489966	0.1593950757683218	0.07977989034872043	0.03254866899482808	0.09622878831655408	0.03193098863419086	0.08241136034269161	0.02636715364008455	0.08869601169913258	0.13414173953461112	0.3868887254010977	0.08276149620939327	0.11136274663009631	0.13813119472198165
C0_100326	0.15853922589006056	0.10345943550723323	0.10443922880944838	0.11485770832709669	0.14170212017335487	0.3026855270459507	0.13184518504398698	0.20201767789341576	0.18983775164548505	0.05458063676453929	0.08039963003131875	0.14004089970155773	0.09645721224203577	0.09064338816818258	0.1133356873271009	0.21574017666172643	0.2354574861946457	0.36001382157088274	0.3045934004270839	0.06723932889597209	0.06065684063608281	0.21649468973506472	0.26227693031530286	0.05473051975191213	0.08292154857569983	0.09320436402656548	0.16890876829842058	0.2431490166570311	0.24414291347544206	0.17157356331553286	0.23644129961095292	0.18221696871723575	0.10375952251060097	0.13066740718121775	0.10295717829016639	0.2519506442480918	0.2730494707920916	0.15545080065815797	0.045920924883743705	0.011072523480628368	0.10065956112773154	0.12121594482541664	0.065702066660775	0.03682560183690331	0.18965448164063756	0.1832433742626935	0.08152105430783935	-0.0023746275329626985	0.0881062501968611
C0_102045	0.1168484503900145	0.09157127688027955	0.1368396521575923	0.12378200472126258	0.09666204736560552	0.2644470108219551	0.17258666711826814	0.09208977774956376	0.10894388708986413	0.1370970843445114	0.1385015124967519	0.15174693376945145	0.1415459997080203	0.08533370138923413	0.15549470999461065	0.24015054979669864	0.2303037607179652	0.31308098432455383	0.16931078098947094	0.15471006986882474	0.1192096790796657	0.2067644408510454	0.2050094593250386	0.19680502635718364	0.09275394596828483	0.15693980035166014	0.13873592615586358	0.2754873078577434	0.21080946664541023	0.0781566237712066	0.22302036338537956	0.1268413986330736	0.14057544956337792	0.0706038576920908	0.20270317412845318	0.24424599730479565	0.34187334236109557	0.13695208984188537	0.17645393447163094	0.1665099089001167	0.08869231900301502	0.19335249331018314	0.08270359753917991	0.1121095147952941	0.1609945852701709	0.11131949266147975	0.19946334952820954	0.07415992587180843	0.010612028974036961
C0_104089	0.055482256232472583	0.19094721337612916	0.15208285862831838	0.1784654283172898	0.20965965749691026	0.2976185681663431	0.1829787860000248	0.09362850626681647	0.11760878945453626	0.15275447961404592	0.06821697448415366	0.14531081355705744	0.16556952043179338	0.05317320104474372	0.1485310383468232	0.18050754237323266	0.2257994174736366	0.26190649404278044	0.18631995445170071	0.16511448321535635	0.13796571592091078	0.13082302276849764	0.14255653769025786	0.17920713539615893	0.21678632977408885	0.13334822639751318	0.1268404494592156	0.14546143058947397	0.14657794003533456	0.04808371859771445	0.12532116230918047	0.08040349893828826	0.13441073600091336	0.12950411336604725	0.15574190530673754	0.2486736976860389	0.30570658286278435	0.13076424843422457	0.23793002493677767	0.2776004992546448	0.1826551811490878	0.229661938369297	0.0713323769480379	0.18720443140178147	0.10179128087424191	0.22676104965433042	0.16635072342279703	0.16432141296897865	0.06624434782891554
C0_105172	0.14540629770112706	0.1534729569548297	0.07343823905682201	0.08818259542540766	0.21129510961401407	0.2615256284968988	0.1955189827810853	0.159750884710344	0.15029244615499868	0.1502603892368266	0.1065818954833914	0.08644616626118061	0.1002247868092307	0.08414749523873644	0.12212837443766507	0.14271505153863678	0.1721368560045825	0.27100240053730945	0.16657457803945727	0.1428161467655542	0.06148940964707096	0.17192741398987207	0.18202025969585445	0.11502787654117719	0.13821621688159802	0.07201253842163532	0.19264151779623823	0.25030157827528055	0.22653285810784762	0.1340807456526261	0.21432929418964022	0.10300564173618257	0.07791301532451184	0.09345485884246747	0.20570580537851138	0.22625484206790142	0.29109106040151295	0.12807343765973686	0.1261251342538599	0.19488689266009515	0.18887677838695677	0.24057150981225203	0.11647457182976184	0.14250136303121533	0.15047179452621628	0.18191667903378825	0.05457863977805694	0.09302840255404289	0.15561456524693815
C0_106720	0.15830229754184383	-9.372321115225252E-4	0.06790753335932043	0.08428109709822804	0.1113849976134704	0.3937145954703201	0.202624041698054	0.18155573619890875	0.14579304578703076	0.12977297341850616	0.07518010232192815	0.10169815984574052	0.1077669069978302	0.10292363880918239	0.16062366194986974	0.20756359290474302	0.17756689211568003	0.33256905185326213	0.25505721747807825	0.05922852127486541	0.14320442232335073	0.20619180275064125	0.26216979949367375	0.056891320681194006	0.1483377533602081	0.10981798280435663	0.12594527709615053	0.2148225652196476	0.25520754303257537	0.10815763736508148	0.18327935455618038	0.15032142450176542	0.13946613459075743	0.07013065933115593	0.09551624761025546	0.23299856706188116	0.3509788188193881	0.09310708522502055	0.06112425569182575	0.13000388646311448	0.15800726522473235	0.1795958934641629	0.06319800588229356	0.1652101268941407	0.1342154670873444	0.21871440806702905	0.11178757777446353	0.11357564207302402	0.10650728361508678
C0_108564	0.04910925442584958	0.06657396735792986	0.03143643668489375	0.09886145043958244	0.0634594935765069	0.3098531242704219	0.15368211908023188	0.13638498868495344	0.06741280524425718	0.07120251249848106	0.054624854399707316	0.06861234633711216	0.1394721136765815	0.04068188167382342	0.16122534583150225	0.0838827212785404	0.17855905252723292	0.143609073459657	0.12330303449231352	0.18276843962574665	0.05992306110931126	0.14631380996972512	0.17657810970159968	0.09921467073397379	0.053159399145976116	0.07478016367761034	0.08465015637026521	0.1801973933493599	0.15087513057247967	0.0472397888756199	0.14814003698576692	0.08053845204703573	0.01870374268980201	0.06588428875562685	0.18115726162931423	0.15974109754253996	0.3328625654489	0.09693470011187884	0.05051235316710031	0.0439111780629615	0.11173295154363395	0.08807532060280125	0.05465983680106858	0.14043520711527388	0.0882065057135183	0.2141756964705175	0.06162311492339128	0.07077333606723579	0.06227747551553709
C0_112750	0.05976227683205054	0.07637851829404915	0.07230352106254793	0.0770479586896939	0.07007326686703139	0.09681057853204428	0.06170954434236132	0.04566438294517918	0.06084198764762825	0.08186917019574094	0.18009840576001568	0.07596663295433466	0.10508039613124259	0.09188926562816445	0.048395571668141166	0.05393140188874911	0.029394203093026663	0.07095685138702522	0.06961948369891725	0.07155511312087577	0.10723392318497582	0.07848720501342038	0.019319213890125975	0.008034775721130314	0.06218328526909154	0.08149450219027045	0.09689980960437716	0.10041258835352114	0.0084385119901336	0.15632653136680072	0.060047165903205614	0.08089100596023716	0.1150790167188051	0.10616445849624008	0.058775119379090315	0.03052518983781184	0.027203896257415653	0.04234565240708141	0.04740510936387203	0.07975952876214887	0.05054761093121258	0.07127794762260213	0.07579669062397812	0.05594084340803379	0.052616578741257136	0.19874329549866174	0.027013646734782307	0.048252770990922754	0.14759859875885512
C0_115355	0.024746729777050613	0.06714118348695444	0.09332645310875444	0.06826478462928555	0.04017168753777752	0.2028710895545936	0.07414915336874926	0.10414852794643319	0.08055295989618742	0.055691659884058435	0.040896964843404576	0.09353205206227452	0.03814186120491001	0.07195777199281218	0.05678137429161169	0.09877208636281651	0.02388205540001529	0.13401854011428552	0.06464518744064235	0.08810876918582695	0.02715376924306144	0.04718796462385713	0.09370899271518848	0.05011938617280403	0.06466510509904312	0.08027113728134228	0.07670813281156183	0.11430118341757058	0.1093963821986944	0.1130773762106885	0.03262080892860151	0.05073566911320338	0.11386032852672884	8.693160710159595E-5	0.03266814861447113	0.06621756566750477	0.1106671030031383	0.056301455907330926	0.0968605486705494	0.03523788797518164	0.011604518187424228	0.025851644611062086	0.061732396164312114	0.015516298319131958	0.10215375108640355	0.07643877041435765	0.06241045911169768	0.041246717687328266	0.014268930485867231
C0_117158	0.019764561186685944	0.10476464220944023	0.09383200915053429	0.08488242067586921	0.11390516031063727	0.19760823581424292	0.04510964403384695	0.061187515133439146	0.08313872132491264	0.0868324394782691	0.05544759724756395	0.07179059406711272	0.060510787215789244	0.05017544627765459	0.07014971527537929	0.08520013753449014	0.09693076145060578	0.03827900736942486	0.1021805331635417	0.03816392178256045	0.050588817542260224	0.04752693703589476	0.10909738394085645	0.07687712138321219	0.04744878820454063	0.047561786122476114	0.06794344863418501	0.08448522038542974	0.09597941953266434	0.09464683989632167	0.06643301849604408	0.003275177279057059	0.056219445868813424	0.13412613810343904	0.07381084084720392	0.15532436446188413	0.07702858337992381	0.0936320519735879	0.08972259643439362	0.06501348955867965	0.04245363274192725	0.07098855506238907	0.07786813245745583	0.0729971552195885	-0.0025088506015054236	0.011083454728230505	0.07856264538615274	0.1045802781082595	0.06719380984617555
C0_119875	0.03996449251634992	0.08647031778368103	0.06264384678224223	0.04635995179373105	0.04706974010130003	0.14581974514346477	0.07467394231555814	0.029285622521349575	0.05541071087879182	0.04632244165522048	0.05469428525573585	0.07788400781558807	0.07385519661534488	0.06228456621925675	0.06633614321478332	0.08025187522587846	0.04105286074417376	0.09407179683548206	0.08708669987127803	0.0843560653601749	0.053523805340950255	0.06042103568149811	0.06580396279875653	0.09166809617528855	0.0782113505582838	0.07420991514357904	0.0428566867117061	0.03620140698940187	0.036698299304371115	0.08846401398154306	0.009139841516584184	0.057508709707808206	0.02257394373096017	0.06814441624200217	0.06541727240542837	0.15283524372942645	0.1047776742458753	0.016221482281297175	0.07544889724268602	0.1132448573656787	0.0894760668276011	0.0391570997890001	0.06489058293941735	0.08842669894355791	0.08425382966108456	0.10391130130838988	0.03694076432935926	0.0785059753078674	0.042262404416010625
C0_121525	0.06540654712856923	0.077902504770627	0.06752656442631393	0.0970858136511571	0.08047684459395978	0.1788841142634309	0.05330633172444962	0.05226688629114189	0.07523878090797481	0.08827526848747638	0.012004433908990135	0.02365894798527501	0.08091489160098769	0.005385239972370604	0.07600995881986997	0.023953619666061465	0.07398614113651024	0.09077250926823112	0.032915353187147986	0.03253748774938107	0.04055396791305958	0.05321895670005284	0.13285345041742838	0.051289396377522854	0.06374334274216018	0.01839251321175918	0.032020285178476	0.13973291223621806	0.09339941995789458	0.05291212332463828	0.07464430763796005	0.05513640457499042	0.08076211561487598	0.015238066438659196	0.0529513320805217	0.09761489738307622	0.15023714061457208	0.07291186025548194	0.040535743567124145	0.10905719573812168	0.08216359707177948	0.10138006873415897	0.017232945505810223	0.11561913140697984	0.03263284508269332	0.08393293854106205	0.007140926426040603	-0.0019468025679062497	0.07439893105472384
C0_124652	0.014612787678294764	0.044964589176581825	0.049296410913333664	0.06951712819606806	0.04654645753455451	0.1656908447518931	0.01826522819949492	0.05471542027907407	-0.00592237917541736	0.07483774291315883	0.01611446187511426	0.046056604543223	0.04821779999848631	0.05436070690707469	0.02757125428025342	0.017913422507271036	0.07963197610876484	0.012233490991059564	0.06424181368135709	0.05972964884822265	-0.0012967132882572342	0.07163101408980453	0.04868802819248815	0.01398334982244962	0.06162342190641304	0.06847177067247147	0.046204500715385705	0.03105196532450726	0.09573494952833425	0.0034470535387363457	0.05616413714949764	0.0445673535215734	0.052258053993261736	0.0402664150930305	0.04347474084488924	0.12071485245137367	0.1129465615860089	0.05386627281841937	0.03220840077458389	0.03493343404000439	0.04959388146187433	0.05592406864885613	0.05968373539158939	0.07717415372047834	0.08595718683595203	0.05191879378879041	0.027831602776759286	0.04359686561028241	0.0796866839239932
C0_126365	0.05633137503919436	0.06890856084099958	0.027616886369034675	0.029844401922248093	0.08463992649394296	0.08141372191333883	0.05438924098574747	0.012131630378476964	0.050786446777056765	0.06505844747045629	0.0649491546814607	0.010286346431077238	0.01284852112851803	0.07625177832804082	0.061268626273390005	0.036785184216181266	0.04522110154047351	0.056480238527896624	0.04783413423458373	0.030009425654440924	0.05755565711429181	0.05519231231164474	0.019799464887769628	0.0309350096583837	0.0037778404466532645	0.017516948975827062	0.027025201272411977	0.06470424758493233	0.05203842278212529	0.06217395054182262	0.03238536195869469	0.08690014200975335	0.051978124618866105	0.05527493535415837	0.012764514663286913	0.05294439324220069	0.03364080537450639	0.002535374929546027	0.028213640363461967	0.017643075728827635	0.014715973774851987	0.028468935383487774	0.0471612109191184	0.058124631196855125	0.029798958365237986	0.12293613853538242	0.07428792580115356	0.058620336433478644	0.060528437328388786
C0_130266	0.014501494468910222	0.04299573051620861	0.042552462753914555	0.0792363948113715	0.07634275991207985	0.11891965620699099	0.048010683634345706	0.03037802964074318	0.050422509318376975	0.059921688962502745	0.052895372370737735	0.026387929345395283	0.04724778929578993	0.02195639127792595	0.03425991475486438	0.06811998987096438	0.07636014676489612	0.09801785832435767	0.05192636642900872	0.036560337171158995	0.07337289046989887	0.02942259718437061	0.04508495739238121	0.0429532343994249	0.0819898746104254	0.06126656357517698	0.0692261936448759	0.10196354882432206	0.016694724878276244	0.06993644633231498	0.07040422730683113	0.07985744465902332	0.05027027947322453	0.010922547955593082	0.0010183979346455937	0.09007762779000177	0.039156855947032464	0.03801568609897554	0.10000049844808534	0.04581637470359584	0.00813855631976678	0.09843915240191867	0.048463209338024386	0.07228303007702627	0.07865336597369621	0.09643722086778782	0.06479053553768485	0.0760356788218712	0.0710059078930843
C0_131976	0.05402329553428563	0.03724479624856477	0.06435601542005472	0.07277471237860769	0.036610771937426546	0.02876262979117228	0.005634803797075173	0.01584115616958347	0.045445906241626546	0.051216579976913874	0.00525909360922633	0.03843894448834465	0.02676046818781977	0.005316688365502365	0.05885862829727105	0.07025780678921599	0.028580777215885627	0.020777695561676475	0.03229168215355814	0.046826094464605755	0.053876366160776616	0.021860622670935286	0.031186239213944627	0.07328854754344781	0.08657792062023499	0.0479424666926897	0.08445004247726465	0.05710970570533757	0.053726580578348185	-5.191731840403677E-4	0.04936141778241971	0.059732078533686755	0.0064912341597933455	0.044908337575821015	0.03691929765912477	0.021899085241607153	0.07648410283441943	0.03526671101418278	0.0401098146140875	0.05105044454881959	0.06126173873740036	0.03335156176788782	0.023245800403905524	0.018132813365336998	0.06367389241756931	0.09983234103859237	0.02761508815840719	0.03258445800335999	0.04791437834391162
C0_134972	0.07268494755157763	0.056927783654590995	0.018190112914223188	0.07969707052887856	0.07147885635263408	0.07922454893508747	0.05027968452986742	0.0745158909260832	0.06879947430055137	0.10391441525486991	0.03927553045788924	0.06543910129260701	0.05323767953531	0.05733353746889154	0.06441793028773589	0.019737311789684835	0.07761926038392546	0.08169918430169587	0.05459006429146411	0.06591715499607226	0.03434112876759666	0.04521723159493236	0.04782619290232254	0.06433744382224632	0.03128454969871909	0.08616991045736506	0.02186230954831054	0.07567413280450475	0.07365504331214566	0.08625173570243046	0.052041717306248896	0.05525884876524132	0.004580928151316871	0.04411285972483271	0.05611973685897984	0.07804215672446611	0.10640702381017993	0.05968209694458085	0.061159098904650766	0.06657076635145658	0.07421900589333828	0.07220903087397347	0.0635698442935337	0.062066518979325656	0.02999887671896196	0.10683508454241841	0.06195628074618475	0.0525011999948343	0.00946362421258183
C0_139280	0.038650918049831375	0.04447371215527426	0.05445535151316408	0.050809589179757954	0.053842710950734306	0.05429239759019472	0.045989265048573084	0.05519883179398907	0.06413375905535744	0.03992353811885863	0.06821679993415146	0.04918008605426447	0.056765274943093566	0.04587416959239251	0.04544623207924076	0.04337196094454728	0.07466180668711198	0.09569827440591114	0.05824179757340875	0.04983539141498527	0.06729541780628726	0.03871966657737839	0.044623194179734926	0.05126412985158529	0.05861391282079473	0.03629013023327269	0.05821872380137214	0.06268576503456805	0.05931004460990974	0.07357540546490597	0.08719625642497521	0.04760603555965784	0.03670423223620103	0.06074715409861767	0.04378755296543308	0.07347910762097491	0.06188120925639403	0.04094574384650359	0.07850128496541608	0.06365621622420377	0.0481404672320482	0.05664629885998543	0.039046753315484156	0.07522332820489983	0.0665245986362069	0.09603112437227448	0.04492404709135427	0.0385250769286968	0.06996073297174718
C0_144000	0.03507528940468672	0.05378021076179209	0.027576814188386638	0.062345899799040407	0.04813629967823038	0.014205238883896019	0.03453635921173985	0.037538072027948406	0.052384656064481984	0.030018599697950312	0.05515873669737895	0.02701809407206826	0.03651912955614841	0.038184278828082376	0.030160656756090393	0.02150415578914674	0.036552461346298804	0.041650834694436825	0.0485843203276654	0.025283934973008376	0.060604802223165784	0.04198579144643361	0.036103482512816004	0.048985863514472	0.053293574456376676	0.024842786601306618	0.04680835974059901	0.04025831931662277	0.03202081452255699	0.08509831669399899	0.03666272005880978	0.03155770121854876	0.07685887137130619	0.05679299925998127	0.0237655788627703	0.014188043047272642	0.009174274066042138	0.027681123249598906	0.06428699319744258	0.06194563486001257	0.04701653160034798	0.1045781361505838	0.02516348677245785	0.03175448556945523	0.04129939334854893	0.1136086694962866	0.04789782179592117	0.017065749283256416	0.02172671369004728
[truncated: 205 more columns]

## Sheet: CTRL vs. IR IMAC-Cu
Supplemental Table S1. SELDI-TOF raw data for CTRL vs. IR analyses (IMAC-Cu arrays)
	CONTROL GROUP (DAY 3)																																IRRADIATED GROUP (DAY 3)
Sample Name	NI_1_J3	NI_9_J3	NI_17_J3	NI_25_J3	NI_33_J3	NI_41_J3	NI_49_J3	NI_57_J3	NI_65_J3	NI_73_J3	NI_81_J3	NI_89_J3	NI_97_J3	NI_105_J3	NI_113_J3	NI_121_J3	NI_129_J3	NI_137_J3	NI_145_J3	NI_153_J3	NI_161_J3	NI_169_J3	NI_177_J3	NI_185_J3	NI_193_J3	NI_201_J3	NI_209_J3	NI_217_J3	NI_225_J3	NI_233_J3	NI_241_J3	NI_249_J3	Irr_2_J3	Irr_3_J3	Irr_4_J3	Irr_10_J3	Irr_11_J3	Irr_12_J3	Irr_18_J3	Irr_19_J3	Irr_20_J3	Irr_26_J3	Irr_27_J3	Irr_28_J3	Irr_34_J3	Irr_35_J3	Irr_36_J3	Irr_42_J3	Irr_43_J3
Sample Number	1	2	3	4	5	6	7	8	9	10	11	12	13	14	15	16	17	18	19	20	21	22	23	24	25	26	27	28	29	30	31	32	33	34	35	36	37	38	39	40	41	42	43	44	45	46	47	48	49
C0_3230	9.735570141094753	7.928661921932075	9.188878309619362	10.499393792599843	9.058992959686462	7.4899996115178356	8.976268749934896	8.14930955889802	10.010626726058579	8.240209965794659	7.828956363250526	10.837782935870807	8.01072894119129	8.64102468815993	8.917833802830547	8.085067223187865	11.204393354208136	12.119717660654642	7.9603636240110065	8.610132659435022	6.475823260597818	9.12851707131949	8.233666182901487	9.736913495084304	7.238292729615815	8.301064334249963	9.156166221454459	8.792429928921889	7.867200291217007	12.152253028774794	10.426016811284647	11.256486624387433	19.800097964668442	9.942160537612578	10.192834146117091	7.406619191908612	8.264797933253229	11.224159942262993	9.698113795503234	10.10154519441351	8.746990732148985	7.572231010327333	8.674767823827102	9.20010608233662	10.028871293401874	8.852528498678799	8.913042732059791	6.219080462810025	6.4661807767505275
C0_3357	9.331439312100917	7.971661439718655	7.89172848773966	8.001797413215222	7.337570414480155	8.479245692768355	7.788455720142823	9.673994598036899	8.536635125719144	8.369956507040332	8.640197191555146	10.789270857286235	7.6993105830908215	6.987827437047236	8.540138995815362	7.520401306586228	9.624697206521377	11.096413692753755	10.703259080350694	7.961328481335056	7.059910310566004	11.440808223279303	10.188652016243712	7.750553405648727	8.633577230572573	8.419855701197807	7.329112739508797	6.374353003518415	9.382701274955677	10.42671653209041	9.08795631191934	9.750453340897517	20.804805119155848	8.64105725736045	8.604214666321422	9.182264619005466	7.736243225055791	9.104298144259229	8.538580851293254	9.303338236864452	7.878833088220766	6.893519664827481	7.061935125446894	8.26869084043983	7.44819951497186	6.606023611092504	7.7142326563987424	5.702406567010232	7.36194762407851
C0_3437	7.281563415720125	7.933361944614429	1.597913256151729	1.3941445755834105	5.850529231376597	5.41784543804224	0.6630655237986073	7.808905240892992	3.5858008951212024	12.37558457434307	10.602663196139018	-0.22494652737960252	8.892110837745756	3.150425614301425	4.625724326707775	4.35433536345064	2.0722836157046194	5.323561911524211	4.899968699485272	1.9161149463519016	3.1855085106797167	7.823291103243797	1.17354973570414	1.8436326025196845	8.256836420052242	5.646762163515866	7.124757905996078	0.44885273326141456	1.8734769273742697	2.4997078570331217	1.7567002512994816	1.1508522934313443	14.365587304991836	1.821074152595465	1.748265792046536	6.978175429141251	1.7288273110857408	1.1569563592992353	0.7209791178145634	1.0781022953901667	1.498437767326368	5.9396193127086905	3.9561973725110278	8.710609792802057	1.5420104109445585	4.117622599805771	5.791192571003328	10.44868481061959	10.620621594501682
C0_3510	8.507251902268457	8.133310873848362	7.998240294266049	7.42547899930451	6.615947017136192	6.655752599895664	7.644192084787972	7.923332094153567	9.03427742997458	8.568490954060394	8.972081738114346	8.8952231488427	8.653733683399278	7.494729649096039	9.32709480509928	8.269641074593965	7.892948647150381	8.72180116183902	7.920447748549407	7.217323383745073	7.80690950045423	8.50038675216477	8.941002955018538	8.325828089988978	6.753771979096987	6.871920918019249	7.851485820993999	5.607617394996713	6.366485378985289	8.072688425337617	7.550846471986555	9.009586186066938	19.2727152956686	7.856812859073687	7.145595859665242	7.593980792453446	7.8802316824990255	8.736882056990597	8.026783290976526	8.802456599909712	6.157682372333741	7.038935684932778	7.1059115877242895	7.8379566810022325	7.743124295465086	7.105406202766329	6.351561916895354	7.393395934650839	6.718278805565886
C0_3670	8.817057536429177	8.006283729403798	8.111928894516556	9.091069877984992	6.426427930328174	6.097124743557595	8.2943528470236	7.833902053336305	8.771567638412549	7.768249126092373	6.289446490280638	10.501545273789459	6.761592753353389	7.109811122894823	8.06103076898935	7.401372324848453	8.617493056861681	9.705423962600792	8.19383018016775	6.9779152828472935	6.31709359747137	6.843259834644587	7.464822094921868	8.340851996759563	6.3257181742165365	8.160707920588	8.488289532591851	6.364801833764973	6.633982990387648	8.622119397089799	8.936340533129762	9.619575335900862	3.7692679155002553	10.00692191972667	9.847473736608624	7.342502090639975	7.983665363284207	9.19723173871753	9.995015283390131	9.44396839087418	7.788500432889481	7.98844668714382	7.317699230120066	8.032967529910922	8.555258889181458	7.161903232673772	7.97924101336191	6.1543123986804185	5.909796564502268
C0_3914	9.215271564268438	7.889410185369321	7.053779055022422	6.730266611980435	6.97062480122624	7.641602658687281	5.73403020300264	7.119798192060391	7.7516603669145505	7.459544934512636	7.625177931490021	8.863991397776996	6.822993269629083	6.659746380289075	8.323020571125229	8.392553989055868	7.606432576535901	8.06631819114557	5.586382527032674	7.632821965090776	6.8101189811757425	6.786589099885944	6.602556304881502	8.949332284365372	6.553378563613741	7.949992726018328	8.128217396938282	7.71289183712598	8.166598535391026	8.815874924512615	9.302447885917434	9.164225057485616	6.939664021775617	7.777141632057418	7.3895413659795155	8.085039901339314	6.821548655358357	7.960201539996386	7.671669935315983	8.60918713289829	6.476949382224978	6.679904912609462	6.411883255458646	6.270140744771759	7.49169005040479	7.574196224383302	7.6025994751238395	6.662781804363287	6.720413197193775
C0_4249	43.07012289818921	31.5213408498231	17.546469864643708	11.80445790235999	30.222229415776198	27.300034181867016	11.434167455852815	33.44106179463716	30.651739005738197	69.24473991399378	68.76610568400994	13.26786210130656	67.74521523299298	24.860367864562196	41.124874686072545	18.903928278302086	13.358735505346628	30.78565072169714	26.3296205143441	16.13036121373791	32.19102590875125	40.286473601285174	13.495374847305213	14.515111177210878	49.52119655098429	46.48075264519471	32.84448015651479	12.888615096143118	20.04990645763967	20.628569266991367	15.795605529332805	10.85447059644793	36.22944258968491	11.51048692291975	7.270036671233895	36.70479744853381	26.729457696193624	13.60878258803035	12.168673748099812	11.782263682924475	12.609750403510201	21.973797518679866	24.396846442112356	36.958058070988066	15.06369388042323	31.522780008100955	27.728790047472295	60.93338768372859	59.954384238842536
C0_4425	14.29637867480582	16.93105179376038	10.009973317106068	11.677936153455153	17.409342001526923	16.87648904668111	12.546051061572955	12.055364793025303	12.171128654529175	20.374428540733806	24.67593326614876	8.04745208331433	22.932424611469923	8.794367565321183	11.599010317116683	13.520577802376796	6.499504538057588	10.04822826202855	11.622127376410912	8.138511331376002	5.0924883362288655	10.138028769072784	7.130653974274395	1.9666901970368855	14.445195092017105	12.852266283656768	11.98083461567155	7.769073687170063	9.235474206996967	10.34172799908324	8.577991046082216	1.361485367051267	13.759802243278905	12.578246380227574	10.076673222890788	20.885127793985436	14.941292556981624	8.571019889905095	9.178266811426566	9.249165323146604	11.295702604450899	14.465530988264586	13.488057310362539	15.108668100428943	13.369423128646552	22.375024817455667	32.998119241373	22.399969760155958	22.854051858462096
C0_4685	13.146060878692497	16.862254265205884	7.949561246769817	4.500985257417799	13.171690750847768	13.35004056420921	4.341995506486345	14.347163340220616	10.988081637254883	33.95369192699742	29.820576308869335	2.055287930628884	36.368291867735124	11.607783212997244	18.4265389951605	10.398320133726894	4.512215480516875	11.492822716704795	10.89611744139716	4.994019106562826	10.180113099081833	20.742274284822884	3.034497786288518	5.567139060704213	23.082111263515642	20.564832690713363	15.356910851775721	3.8767232727868084	8.159167368514298	7.2522239294931685	6.034532211864662	2.7814908845409425	20.894493364645093	1.961987625702883	1.1146925792021252	20.373941435866428	12.255661340680765	1.7635477335080172	2.1356728884502285	1.4486979042808972	4.176455460468012	12.286431918934074	13.202479812618567	16.797273702068065	2.9276153208208884	20.443889684117742	16.59556416588841	24.467090458420707	30.727760491479174
C0_4785	10.782227555426536	10.024841075700316	2.68935741404119	2.3150919615811647	3.929065776786231	11.120019331278838	2.111356009482389	9.210687374928408	3.1900479807481923	16.59571883313597	15.965850725107044	5.4438578746351025	19.541387873706032	3.541316571247362	10.088170547722816	9.554575414197254	6.45399226080924	8.89760881133042	8.947665314139439	6.104112745565121	8.337051045198217	16.63540834243349	7.379753949764965	3.651394186858727	15.11540486461106	12.112465233404587	5.910095769890586	2.071763773333668	5.610882117754756	3.6947746204859797	3.6722766567134424	5.97383816220488	18.253745211488457	4.923937342014995	4.732102638785789	11.170770682704887	3.4476967776838863	4.89645631259506	1.3616800732830927	1.6991791000637537	3.248701635027597	5.855132629733801	3.4178596964952557	8.338716188649444	1.9651195607501022	10.559197999235732	9.912268598226488	14.741167824732422	15.106139007952896
C0_5085	15.006470805291501	8.69503277629271	9.596405661304736	9.905229344014405	7.913138765841578	7.982814712840685	10.10956222812417	7.652401227564959	12.007426444663935	10.21399624058339	10.128896716199415	12.302069754370397	9.06010754788782	9.878476974175303	10.547793167888992	11.119173380266663	9.555720617569262	12.370705715798858	8.402633186735473	12.664815182817023	12.084425366905313	10.56825167748692	12.234009123852216	15.622763211072074	9.691803122272916	9.790072628014487	12.36289269108503	13.1514591234527	13.161376904669053	15.026161639897563	19.33586033925612	18.37706109409828	5.670111528667475	10.648053678405962	11.286114057926982	8.648863839441445	8.81375263347845	10.412289588699704	9.72993801191297	9.937403132168166	7.451977476636466	7.27285892861058	8.119275440640111	8.090641758469957	9.391646418669948	8.96812260492066	12.782205260708858	7.027579350053571	6.020803380269122
C0_5288	10.470559075911064	14.53599592584794	10.455499286725933	9.87831955419512	9.746342951275977	11.135885023829989	7.3641584853499795	12.02097926720508	10.989394504837431	13.338042697565838	21.103186554407614	11.877370495600319	11.147380953460647	8.323603503595832	11.550717417183845	10.338241603274062	8.920406197209855	8.314220351426313	8.696639135313422	3.992419820417676	8.882589759572443	20.43655796767208	12.606779543178686	9.012983872022135	11.264269406062134	9.372018014855328	11.14607545726616	6.194068153391991	4.972609664854939	6.737450453432503	6.725122923395796	7.864533384014249	42.86045338897989	10.639152220390825	8.74710448607642	13.221068172039505	10.916027817450097	11.025782148293292	10.301168782936818	8.196513237232612	8.737618691996593	11.885303449327758	10.891663852979802	9.345158657436931	11.180430682115231	9.468548343417572	8.704191447735521	9.284652990713532	12.293272747045911
C0_5894	14.25441028540307	22.37003629030969	4.446759749902189	5.594158800549355	11.420516279065987	12.31203724045614	4.462569614476138	13.501159958390854	14.680002175705042	39.71620591133338	26.247711511132817	4.110770147677872	29.06580028238629	8.433365754943766	11.741379672621635	15.40242980406734	5.94430877183188	11.851687356890368	11.854105545249435	4.9967983661840645	16.372744565346686	17.007089732854425	9.636677140498103	8.43170682111551	28.49618380505909	13.067718164352824	17.332683448466494	4.097042405298504	16.960409174490096	10.018903969637632	10.11218034291426	7.284871967097192	47.620781616819194	3.5126476986196633	3.6086763477028194	14.740921630733137	4.420030243586054	4.421317432045288	4.716909887655615	4.947408854104938	4.759241128646852	12.859051878010538	9.799010639305076	15.500745803284785	4.700265068642615	13.99265116308631	25.896277904918648	23.665229009336667	22.45410343666938
C0_5995	39.06103094678352	34.07678829740931	5.0618779727754015	4.806575129018392	10.713159588528573	13.90346031034008	8.154769077056852	21.574545725646036	35.81771927710174	116.30270045344274	51.55316081813237	5.315229183383934	35.24230902730285	19.054842446173204	26.926364337968863	37.99482453918911	12.855571337552993	23.973540163045964	17.310131182348613	12.389569968497012	43.38684459814485	34.25230062164588	16.59779779948051	27.335915073024776	66.95721896068302	23.886950713958807	62.699691452263714	10.72906734660295	60.475937773563665	26.445322230525594	34.35848977345075	24.440019422866957	80.36808260215936	3.2204853142322523	2.8564876337013354	20.30906309364326	7.60134983664054	4.390678843229088	4.169179924465002	6.348713167335738	7.649302066950686	12.527180391252243	7.546330949620132	17.49080855431322	5.046994043807897	17.939498153002493	37.78477718501873	24.69761323457928	27.832328806134676
C0_6074	38.88907078618773	43.73727707022035	9.595727765395392	8.829810846389567	16.79417473232406	27.114012699501338	16.43538332034268	30.350378593587322	32.246799353975725	104.06834247349951	46.433683226732136	7.675505949432061	34.15927445722428	18.934627588752125	29.046632409156977	33.8404416076143	13.97746427588157	21.222975347193564	22.313126834764077	11.314201497859068	42.998263115369134	42.29986712342627	27.5206543800713	20.639699989228575	70.16210503524604	31.025237985471353	56.83323496421243	11.008136632779854	53.9364887438295	22.356069207071172	28.183068211865738	20.554977517096997	184.68897642297242	6.46305946554726	6.389727400429323	22.498877529722098	12.924948642402686	7.2090888870886065	8.808729378898823	20.066441110087688	15.302869158739428	21.08173362940379	12.175628188300438	36.61744599100137	11.366055525731957	21.09381760312815	24.944733464486127	29.370296121120997	39.67552376790991
C0_6142	46.20847711522328	47.48812128123197	8.311286595560796	7.073187957837281	15.251866347856874	17.47868446003404	13.844665421371035	27.15859821122759	57.18063297770632	157.42997056538974	72.43095308932803	11.291508858456838	43.08657933020267	24.359926959869192	38.50896363379757	46.11465559237911	15.335118953696107	34.847500710867784	28.34329142813264	16.91299164439887	66.24156049571178	44.59209363494684	21.977817099540257	30.98546931396137	113.73020352383278	31.96781771726395	84.91169279735551	15.513292933574006	78.11466134709342	30.45014644205707	39.03425366369935	28.730575216687516	134.2059340751171	6.6451871996239475	6.749245238042146	23.113408347580208	11.64666112736032	7.84549144854922	8.980283938857186	10.827356573374852	11.778335296672273	15.443633975224287	9.027511508010567	24.490645434947726	8.222013603933663	24.011345879206573	33.569504307588666	30.271127886100416	32.997873332104255
C0_6333	44.50048714612092	93.2780617413732	31.03717990683284	22.815904766553157	41.702478514168135	44.37155475202695	19.727174832128316	54.100809208624305	59.75782307841602	97.82411518009096	169.94066579143916	16.28899281895002	61.241194592014374	30.567191893503455	46.24369318635612	58.14934137101768	30.70208397816186	38.26275858053673	46.58401468593039	16.895564461589615	47.75806444531756	94.9633692857432	39.77242027011741	17.152604913353066	70.77804222812695	38.949350733227135	58.97863773528781	16.94708058848172	34.79675796372783	29.525467068881248	20.848353794685572	17.669420521329535	223.63696407651892	32.633504908043385	22.97864355989115	87.59073807046855	56.57794037960794	22.462074607027795	24.134127775627658	28.88838877841655	34.333553896726826	44.31569912712708	27.759149289911488	35.857812294552105	21.72360239720489	30.198661105386954	29.392605907295014	57.19847520152167	71.28052634430993
C0_6462	10.716693288710129	20.62313929808927	7.355303446974581	6.4859596398549515	9.522954051015477	11.473064568414413	5.4781582234631285	14.579897521466622	13.395299248866593	25.236155398937395	24.111569424234233	4.928980454869095	13.132383153996388	7.156886404924271	10.586485102102504	16.935553457296937	7.567388488518089	9.913399942600323	9.916973476137258	5.312260359562286	12.628460532379457	22.99269955747009	8.808458346705883	6.173469328031939	18.803241363571356	10.087728830391429	14.834749386677158	5.679889350583436	11.886787767483948	8.018798793820547	6.963744751518766	6.656911520117168	55.15681358639957	6.780334677212954	5.563698623765051	14.876702780261526	8.85219569490731	6.44048443620565	6.740179123714475	7.288041809340109	7.526339962327126	10.843284852321782	7.845806913522659	11.413591290191663	6.923609924909214	8.46259764998612	8.805363022049699	15.28953572121207	17.248030714899205
C0_6689	10.820893556759067	21.22113912329051	8.014729936087479	5.606893837699626	9.602169224879932	9.857930675792298	4.601406636699365	10.862790545676555	10.650174762213128	18.88180081770176	23.851756310454114	6.967138769952822	17.01244041468882	9.027829326152597	10.293031514851874	10.67146645715677	7.8760806838111534	11.98162033663412	15.212399146763687	5.350559157811252	9.75026106530292	20.65828313101338	12.218745467366084	7.5496844073928875	23.750965000923994	16.119981712531988	14.034706738545886	4.871099334877127	10.411626038384599	7.405784715888934	6.8452115972004055	8.002045225916472	33.34098740761223	6.705975327133439	4.436939082745203	14.030047965129667	8.789909892563614	6.783133900430829	5.5569175655027605	4.950042831918346	6.746014065082106	10.58060183676435	8.53141770271371	13.80495143010631	6.992493884601003	8.504039581999102	7.803806526687152	13.546011714048648	15.636115403322295
C0_6885	34.17765672476944	58.621773402615005	15.29001310775647	10.107962196793453	29.699496313983346	26.141395348870002	10.64413308744367	31.23792742635057	26.235531347112612	76.45152214920121	77.97902586760439	6.531584619191419	57.315376468608484	25.202457984345642	22.10894272384949	36.294166435768126	12.199452119124594	29.205360042845857	27.930750201765527	11.427601288902036	16.48902925036503	24.949273053906435	12.638814147126034	19.70012579223586	43.760834798591105	28.888729387719614	31.853059261153035	5.1996989818930075	16.908179931518436	13.899711399880534	12.556226764327391	12.157646745951903	36.659662322029064	11.646632637590246	6.868482911448702	44.36979465204124	11.687421790365097	7.40918202051384	12.219265859083134	8.373372755110507	13.746292904606758	30.198304035618644	22.941808634291597	50.02572122109975	11.864787470390423	26.82632442628093	36.05485276214321	47.77548640679239	55.00453986206
C0_6924	19.23729201468253	34.891257379140306	11.707651407515588	6.746993661335823	14.907974479434998	21.620727157443127	9.418920106517126	22.223046542833497	11.178858679264113	23.544898670643143	26.195720925569702	1.912988883524954	27.64209326222666	17.017411253870854	11.938046310078697	36.494672355862754	9.887660697948983	10.654226852293082	13.517169158818268	10.592795707549891	14.227980201250887	13.820833481140516	7.371979432885667	9.417863432493311	15.507176588629944	11.16394888817704	15.503157456115476	8.03980138943731	13.050677614473274	11.12919301059624	4.9377090975210365	6.298673859839869	17.7393784451257	11.085080508954787	9.41631513293008	29.64568380627602	10.358026193167873	6.099492212076794	8.733378458697446	6.899931826775754	11.563331241446113	17.805815984659592	12.370506261391519	23.758777159831222	6.677836759312902	12.514334809054894	23.633725887286744	39.77431479026109	40.57754991843429
C0_7054	13.36783911209226	21.10838563887452	5.58962520143386	4.525593175833668	9.43754848741732	8.133994885832593	4.349872935982094	10.374767078288897	10.615021819526287	27.57245963357971	25.75307502570574	2.259741272309549	22.317055358737168	8.236130027699641	8.26100654239164	20.830381740304478	3.916667194174209	9.820884279082964	9.086714049361113	9.26666049104463	7.5434728582262665	10.809137995409051	5.637662395036893	6.749874989230666	13.272342593491052	10.855239779477651	12.021424904063458	5.878019317405548	8.69405346020754	6.328697331317338	6.622476025427108	6.74981321197922	14.632929603411025	5.01134777131766	4.730921338451998	14.91715008959321	4.565274139380129	2.8731998390545965	4.314919711366739	3.753358302372799	6.108304460434263	11.73219759384877	8.148098903394331	19.179788126711863	4.865803477449771	8.248855195740818	13.003673469596281	14.989877653518027	16.66747681988016
C0_7490	177.14629248090773	118.40216146636826	124.90937899245387	113.01727816479496	121.83803177529691	96.90159117332904	125.1235687936325	95.36012611022227	127.72810907147431	132.12754222444042	109.17687206597297	114.06155794494694	73.8768186533819	98.20749379690959	118.27602399781591	120.01992015235747	71.58208333648895	120.66250082636152	80.16055940981458	137.10328173846148	147.20002056006683	81.50243875647587	90.39596654657916	179.91282238222567	92.62926297795595	100.2451055851828	169.75012708515257	148.52476242440002	151.35288506445923	131.90518966294763	222.0699012681637	213.71256552322882	55.40906340808423	112.82689554076251	116.1676238299806	113.9742684076135	97.92792362155573	105.54579024047364	117.07929857109069	129.3807988108448	100.59864327716586	98.23435667006981	111.46760920297814	103.22041375162469	139.88157018236657	138.70597036620617	158.1103956274382	82.20276813132143	55.5831246782787
C0_7566	101.58194698733212	81.98798493526347	86.28729453489119	66.9605099117261	75.4229884625711	71.07384557973307	102.05788262843713	63.85157209770908	117.21870873488957	84.89313605498405	76.10298029403587	94.15848420808189	74.91399772860387	96.60709170299383	93.69744503634435	103.01901023693769	98.2693785973591	119.3288948570196	90.13222166674784	111.89952078006283	104.89790426653455	83.40415177820617	87.60028186054497	118.91309300890696	93.56342066784822	89.26783907110894	104.98424309433804	116.05360883358797	115.8380821786419	120.89219750299218	142.36044348800286	130.59789126912432	45.780529959050455	89.38543298046304	92.8388422303668	75.8659562008829	83.5499175149429	78.52200986885049	84.97294928945314	78.3355457443373	83.98657588743183	62.5804270855647	65.80542283482978	69.85612055440006	64.00366472849623	85.5052342850091	96.96854339737817	61.836530844513604	45.84704446426581
C0_7662	35.62195078702322	36.64357490861945	40.471866042277576	32.12630545952164	33.3527828103897	32.01546251913818	46.39186518802624	29.607089787919527	47.29041499732658	40.81205150404162	34.89319057387587	41.47905216644532	28.27976705978977	40.07615230892246	37.42585225791323	36.19644873700129	45.13597143493225	44.174535070754985	34.548730000699685	43.84649222557897	41.612118465003896	38.10600740213349	43.842986211412864	45.189599516369505	46.48012203643061	38.14893605722057	45.92280579753794	47.20299471861627	46.90770240713297	51.28996468683571	48.7497208391588	50.16885264185669	38.06067365961952	38.81018511790663	41.42803781038659	26.999985831122977	37.46563008535637	40.440016425525215	38.82323422750322	36.66287630561468	36.18423508765138	28.674355634310185	30.894427548509256	29.38465342183119	30.386724801278987	34.817120779642394	35.531505152974916	24.881993136542945	19.80621019114342
C0_7929	99.52056391745695	120.1392482298187	168.26203831179748	166.6164767986051	197.71358406781636	186.1784917146295	130.32561825822972	144.95769858984863	74.39522831658627	71.05940867154202	118.92799965274462	157.93640077895063	157.2571305825146	125.89338286467608	116.57125201131923	45.9171173537914	122.377371678295	102.14727438824899	165.7487839284728	79.38516293989939	77.49315141909162	135.16383731782722	182.08787411166034	97.25643448265158	135.788677923686	168.58579611679036	97.30746895250084	72.47978277899693	55.12748016531209	72.27543093777945	63.74182904244097	69.1012817392138	95.73246822800404	154.61523816260836	142.89143966785258	120.08034637056963	136.52076616304825	157.19653892621338	177.9994268528922	125.37679209560383	144.8121981260495	218.89560323841823	213.35566188358348	179.33675571274304	228.85352917776774	175.60272346739245	82.51209443205319	124.2996394222199	145.55550808519556
C0_8034	51.756370008185485	52.5576656338841	66.27673791961847	64.81431450549911	69.2503556062091	71.29240407156234	53.882507243034716	62.56163115858157	49.612227622478436	41.99972458387024	51.88749184700796	72.55045547054343	59.10447402563733	58.23587358808914	60.72838715334018	38.65709315712725	57.5188004550728	55.648548259736096	64.16008053530483	49.36947039586265	49.30182364196298	57.79638419591617	74.77995067075659	57.141049825628656	55.391055537607215	62.19708659995039	47.87247214665956	55.5999144863471	37.07260286478786	41.08054390714335	37.25550434003678	37.80657607070035	46.73109404231914	58.900095076363556	56.2094043663317	54.25197164405977	57.32829090321163	63.95852372217692	64.50988388539149	51.7357914768028	54.50593723224566	74.92896657070618	74.89017975035564	63.92480554361684	77.18270217050382	68.16589294260812	47.46950825322149	52.030041931312304	56.40322416700595
C0_8271	14.214525043898	26.54305853617671	14.60239451364669	13.755836473495274	18.106273319310983	18.697371157679658	11.10387548474199	16.02633426385354	18.43023600338885	36.85262772061988	40.725077628819996	17.0415013401347	31.917822355796183	18.173600483610965	20.661062231435167	13.204618576208658	14.509061357698732	19.566666462555304	16.749910911865282	15.957635555663483	18.203184961482368	19.933081418793993	20.24616281659497	17.729482887854882	42.047178018266365	23.098442714811387	28.203738040159987	15.99921182116566	10.776304933294782	12.067472458942431	13.107882592532183	10.905637548369416	37.77956418953035	9.866091504500806	9.129760358766928	22.149680427204572	12.571329598721402	12.566324625388562	10.715740379104583	10.359495475262564	12.546427455821345	35.50339376075705	20.155087648339205	19.17695983528525	24.35936713592232	21.49606494028235	22.8475111549808	20.549790849342344	19.873986472372998
C0_8359	22.032806721042235	39.30063500237682	13.483279313826834	14.085135329412616	25.19042966557058	28.90101705972708	14.088240025571292	25.318791446189262	22.117987909388344	58.930535292616646	47.163492143294434	16.827403672827312	27.328355975820692	19.751966658127042	24.516840930681283	24.128413485327233	16.001834853996556	22.16358046852432	23.917341482201664	17.514657833560605	25.308331527562785	39.54403221478615	29.937725576254003	20.121031318320348	59.65686537796171	36.46924306196087	37.37242061730094	17.887163908492965	24.787615268997204	15.610770584354055	16.537161421027164	17.96535811377864	86.52002846515575	11.378775439714081	10.679550034904187	27.7834121278148	17.34556519463101	15.713941594744483	14.160400260668709	12.63996855650685	14.837762134527093	24.891359685203042	22.771543600775395	27.260083908044773	15.601991450544814	23.4462313152632	26.992058683981316	28.588527839193347	34.38006398649602
C0_8794	149.15295447112862	225.08790203538894	142.33886707956637	194.3459313231274	297.5188576537726	264.7078642572257	206.22991324533393	197.90098966910736	174.30943478534573	224.95065759662657	340.78815234799293	96.68101639610977	288.2856614970257	155.72371244316204	183.34208757516996	225.51542890108513	93.83138748063266	147.98225443230442	178.42273873238662	126.62723198814138	82.21312928312972	95.60967983870862	77.05400231540722	129.2755321880176	158.70359069892464	168.79571868230633	157.6211353500263	103.24809221004304	121.6901896464664	151.8355352439628	101.10110004330366	52.02865860753508	91.82764524104658	184.39041279839668	187.0570331729338	274.2988255003462	229.4890356635067	120.22045522621758	162.4921760181084	168.55623953179463	217.3192430332838	219.04518127564145	246.32026708203173	284.9389974866795	212.46086797131795	295.1678329115947	417.8171432132622	352.9698023315931	328.2666507866841
C0_8985	17.09371951290831	33.878182161554356	18.542498238912465	27.73502894180918	35.28096035891584	34.15311402552816	24.115783063966774	24.772111002899493	22.201558699299564	29.263752417155363	45.82880171241604	12.728094546810825	32.90762609997917	21.758141471364986	23.95451932001417	38.64529204378502	14.20950988027554	18.030718874830406	19.41343316861303	16.18581201254601	12.248047762212202	9.18940434906563	10.98780467960755	16.928438657544863	22.860148227673438	18.079034081736047	20.01028470465314	17.90639195774976	15.213157417002448	20.238169271722153	11.597665442826813	7.146338755671175	15.279087802644193	21.896653367450305	24.475398394540118	41.16435164301716	33.62149512957813	17.163934758695365	20.450887879073704	19.64024553330401	28.190992809138333	28.968309710344833	33.028818585975124	32.62589300872407	22.803394452384612	34.621668782842626	65.90471364319589	49.03454087063634	44.51820982938869
C0_9381	7.962716164414793	20.6619451331529	9.453331184943854	11.787702594063173	16.153979540485953	14.829706570731423	7.183045145752565	11.316807941222025	14.294318875055916	19.232710982035737	24.444241006039352	4.776533009738121	27.987847333712033	9.585256027177273	12.805321821855083	19.709139341009312	6.718349234799676	10.46402246701335	11.035523761453506	8.082127890084841	6.313167924864242	6.725574466189139	3.3734700603039913	8.196064283700522	13.597907485608328	10.350415091012705	9.184835379163838	5.343832894231818	5.4835751996191116	8.294074459122408	4.9997398454022886	2.144840395018834	9.217077951648081	7.583206249829798	8.376725164700899	14.045603224540157	12.80373805997386	5.925632357111539	8.576618122810844	6.965481392896308	9.476936816586056	12.471555383327829	13.13923578274415	12.547678576637498	7.563801194684347	16.23117249114106	32.08860038199727	17.24283518425281	22.43516276790439
C0_9549	26.083853712518973	69.65770507602114	25.98297776862862	17.842358586619866	38.0961948235324	28.02709491128681	11.440049460830657	39.196140275333214	33.23800709447396	48.644876155093954	89.01621481624849	11.03074326326974	45.919047762897	22.33101555465051	28.895415501399707	34.59528382982284	19.544579908319204	23.72944468579658	26.73778519234055	10.33968678280728	21.523354942875823	70.6893615644616	24.250985174591474	10.249077827829526	49.371302246179624	31.216532996444542	33.3330425713927	12.201174977629336	17.276601042109007	15.013717367661904	12.294595699161338	10.832562755326775	86.22857580929706	26.874382916016824	16.263449179498096	52.81276762072865	39.40011950690897	16.37292754816408	13.464475112660248	13.311625269671252	27.908302408759525	39.06406336109241	26.498751784272557	31.9635008372355	13.82218133850617	25.557522192593126	38.807411228724845	54.75846080573223	58.605144126700765
C0_9707	7.858705538356739	16.90618802704213	6.99044889918566	8.420093411974802	12.350016947156622	6.946048434348801	1.9648068832133898	9.524282313013058	9.287225104399196	12.32383252832193	18.91778664509814	2.6076665916597896	19.244409747512357	7.435673150343184	8.806023892510035	12.196151234685145	4.905119422572448	8.023050941158509	7.718533660202031	4.5693365725761925	6.276461598080567	11.605876873384236	4.4773506857355265	4.035168772635984	13.096301698502076	8.16107639571307	7.813518525987962	3.750090776907283	4.669929126133134	2.895544257926921	3.1295236161367628	3.6401889833945202	13.616004602046774	4.736664061356233	4.149111013672565	15.814982911131535	9.114070700284364	4.20968235556408	3.6935161097955787	2.432929056273388	5.59557381681922	11.4051727147187	11.260249684707665	12.1944138441086	4.474322955028879	12.164438840690021	31.551525428816802	23.17948327331169	16.50857911902153
C0_9780	6.608045356141388	17.06444344736379	5.235138852234523	5.550749517015649	8.73318016764326	7.419838630840371	1.5903715695634033	9.532168031362104	5.876958272186703	8.114214179794756	19.753828813323114	3.0863691472761663	8.895943366563282	4.290159499082178	5.092775693621596	11.98297869780346	5.048666159597783	4.741820454820393	4.550009296180535	2.059431124119503	7.29180730127938	15.321866378900486	5.393077310352569	2.641596504529905	8.98381150502595	4.472819233086296	8.427097537024531	5.339433318050032	4.939132130249512	4.337917285299614	3.863438592382961	4.932434995566107	12.572552300219302	6.304714755899531	4.3661690771562585	14.927984578932348	11.211456159526339	3.095854923316172	1.7117547793649956	3.9675372237433275	6.435306981726604	7.303699281469449	5.9127414560806555	5.534019887983847	2.4162744829100324	5.5142935630286	12.642598137978482	12.867644452669515	15.65759052393068
C0_10002	2.2964444114204006	6.144769429535424	3.0745628310988624	2.6390736146576796	3.8738933757831875	3.9823908966021975	2.6425649180531985	3.3049145578152053	3.492130268116884	7.436116406248623	8.711887475781962	1.9755056042457115	9.258029951492796	4.002865390445285	4.616837340971163	5.144713943558886	3.778761502358459	3.565098572446303	2.6190603272644313	1.345314885933488	4.358108767060817	2.7112306405108715	3.4066197455304876	2.9449015508244596	3.759715685638849	3.045855872193567	4.576659210318631	3.7395834766407763	4.66651119014468	3.4506102751241885	3.7419347899046445	3.794412399653874	3.6032072368524277	3.4171916844966974	1.301253911094991	4.918846668394125	3.5776087485608827	2.80637397163226	1.308789746817439	2.6999061662504946	2.9267815443783234	4.820664387132948	1.6086534043362937	4.418113905884399	2.7549642643502548	3.969081950911574	6.991811642005091	7.062117100237444	7.181354422712399
C0_10830	5.550629533064704	8.608836728771342	4.693277043908217	4.390725217707833	7.412492401295121	6.064447188027502	2.4327629468640244	3.8546500704723066	4.075744891192458	4.31568537773648	6.2179856036545065	3.168144744885414	6.158981312180449	4.783877172727	4.6021664597106415	2.7959327501055147	2.913022958285537	3.5941645122385224	3.4144735727615347	2.428387056622736	2.078212912065938	6.34404528741408	3.6032530288801303	3.7771426132848958	6.975495450815954	7.94631416381076	5.871931552556207	2.1436110080139654	3.4332707176853727	2.980238583987604	3.470881146921539	3.6600865452315454	3.7953750813818625	4.31617235845296	3.838120535278669	5.818416199606615	6.285387498514429	3.2889321426875266	3.3859653888262726	2.8298955640062893	6.214975908172711	9.416480223643118	9.287650297686225	9.573602573279441	4.684571210785204	8.286640896880675	7.2320918389687865	6.815318322555971	6.1127857524871345
C0_10972	9.229300912442461	13.036498896668123	8.849019562798745	7.878417338017864	10.7913793852069	7.245895741962438	5.6251219408545285	9.555076925624912	6.800110661886722	5.726480642371366	8.539160212151423	6.840443154351499	7.884945876494691	7.130116245990441	8.514488465784375	6.842633852350329	7.238183997385104	6.887618796035194	8.10750198427647	4.708469436245172	5.499123643688596	13.331807427999093	7.397377701438879	5.501310162641769	11.657869663995275	12.148628429915345	10.3118105286297	4.88754961159636	8.327558274472935	8.607508137113395	6.523219124364785	7.203277941996468	11.16271608856727	9.216522776829693	7.1415555696033275	6.724572139015961	7.842358569260577	8.567810514163513	7.078286659972193	7.393112512734108	7.442812202659484	9.378483403422262	8.871608139218502	11.74149949255615	9.17803009760111	6.1260357391159275	5.118937162343426	7.182158076489574	9.008021525968372
C0_11311	2.243429418665168	3.8542129731460184	2.056977089924001	3.295784637437334	3.6191132146401563	2.609846917991912	1.020626653333959	2.2259422706566725	3.182987374164188	2.100408990547672	2.875986760699681	0.9787549928461654	6.395109256664091	2.810534130430339	2.987233121282805	4.4310476458028365	1.7383257811239337	3.237142097843939	2.573148530994536	2.0734474551411815	1.666075294049244	1.1382079675720815	1.828449649637852	2.5600746960518976	1.8510072924791698	2.3343934845636394	1.0602428041967726	0.8721229005039293	0.9416282884081585	0.7381105815795843	0.6209253044993734	0.7372138860588389	0.3039212925259114	1.6685157572213543	1.1863677257157585	4.24486882459399	2.985561409620825	1.2737758150965628	1.7599607688260772	0.699136352568458	1.8991523218660065	2.82400040340972	3.845019717505534	3.667693920617735	2.2609734817138416	5.074954714682055	10.1470352673973	4.579018395492093	3.1489692406662555
C0_11774	58.86130930161097	125.57225459227669	34.407021165803066	34.42006139238715	90.95746955932074	62.72628126079816	16.991965969807847	63.92980983194407	45.36187789217411	89.58912714856821	145.58741619622566	15.114532846652548	227.08074204322978	57.9817312311426	59.47637822064842	81.76980013763472	30.25425790208482	53.125318784862024	54.790652577720856	32.59104484019055	37.69461448039319	49.64134643736103	28.745984821402047	33.628219334967184	95.56671406075007	63.394002118843055	50.245357400546844	15.079466346940317	25.93417103488479	21.699571243022202	26.449394575243478	21.032628109971984	57.86243805415891	26.37425838678357	21.467437074767425	123.35892174064136	42.45599925375499	19.489111469326982	20.74676465550338	18.03060251660795	40.30416279235055	111.39044131068846	85.15030873735566	117.5790246140936	32.06220084126059	90.9249786087491	193.30277588196248	170.93724365116051	156.69653956895746
C0_11821	28.488406561363497	50.80150140765724	17.718186583344046	12.799378983175082	22.93241470282901	36.98092585384567	10.516558584978329	36.780982020342734	19.631592590161794	28.312726298317056	36.31902509070766	5.516487059231426	59.22137681341372	27.583676421217454	20.41948630708189	49.19939585169931	19.64085761244646	21.190100457403428	20.27959009791679	25.807852928417127	30.39948913421747	25.426761368993578	12.301036367373142	13.799292406283742	30.42414856993106	19.723483646469194	24.448053804342084	12.05978474906496	22.39040976676747	14.244625834635855	16.043259592364787	13.764297496661277	25.498559916325544	11.389956831477507	10.187417533002016	49.32420437223688	19.79845028769187	9.604693712815864	8.052835340415157	8.191791525587123	18.175031933644956	37.500484605168424	26.513972075120808	38.24632043585549	9.4035644106191	27.859396935465828	79.39638088836867	91.51133476514414	98.81328676282268
C0_11978	16.858173336264922	31.3848205851323	8.083004132133043	8.95753976944431	17.45616314774318	12.849141903326254	5.354535024908557	14.301084538127752	18.255536568956543	24.72913899252388	29.24797130888244	3.9171004756390366	42.51706740917508	15.970239271298103	13.872010914998937	32.25682249308037	6.8463405767914916	15.708258807028658	11.98715745673174	13.465048339345794	18.335503893943752	11.363265446457826	6.686254878215081	12.397497888351005	23.43017965615851	13.382401079084062	17.052901068091614	9.909628329176686	16.072751756658707	8.50232508265313	14.66997416934306	9.743799081288785	9.335901878174665	6.329280174953987	5.963883701025396	27.995854180025027	10.429358939297764	4.983476841049674	4.850540910388216	4.663831656089494	9.665298735431284	20.99954664154374	16.139851407177073	23.339605088922667	6.170512630465536	20.25887040925473	67.06222062955483	42.5466558056131	34.04139084436473
C0_13576	3.7278871549022554	5.804044309014078	3.244874350847647	3.1804563859526924	2.619920830881458	2.615511367491497	2.1017257865768184	3.073608335087061	4.053266564840554	3.4273601678396988	3.6586718482276286	2.5811113631173677	4.872197671234727	3.3473103469565624	3.518118510877627	5.039945092135236	2.848392831861634	3.454612922683229	2.4225121508560936	8.994342103393677	2.8255775875914217	3.1157936638641592	2.5792162325920756	4.1820951592505855	3.9046126992061794	2.5055564739088356	2.7943933383587307	3.0825353306461256	3.164985829588625	3.575746539372728	3.498372539891499	4.8877576112121535	2.7273474493781893	3.5338382067404037	3.005715773717189	4.532804946535775	3.8371419829151034	3.032975016030441	2.5880244044669087	3.496031792201839	2.7740060138656304	2.979990619843712	2.809771918797232	4.448086003928334	3.0129617677486316	3.5979731022183308	5.876874571923073	4.5095540078311345	4.663786876987701
C0_14054	6.528276939229486	10.620909307560288	7.609022094067257	9.668126657773808	5.683368931617622	7.080457585088598	4.977997016267382	5.7925811778564	9.626158697711462	6.755259480846126	5.023348135392897	6.1334688926936325	19.504967195587454	10.618213265192088	6.957150133947917	16.499723059283195	9.82016716005691	9.075027826847052	7.009323856306396	17.09470644203218	8.921467136048935	5.394356943376054	6.083316012642922	14.81264511116721	6.497578919147845	4.739626010301198	4.7880028804923365	5.554107389158915	6.094756387633176	6.7019366718106195	6.8028734692396	8.084540741861732	3.2660773249148676	8.045720540914324	5.707725426271561	10.140828685919082	8.155839121833196	7.459824878744438	6.692720883951192	5.741672700309396	6.593411159147547	9.24237287639643	8.351590971961443	10.401733886314075	6.147511832433811	11.219272036325183	12.840639320558285	7.809703998612149	7.740214441632371
C0_14155	7.028538781709189	8.564961252850393	7.422076209247901	8.192236524241304	5.424725064267457	6.474304801663251	5.021540651429638	6.2660011937695215	8.440482945095852	5.43561632727291	4.676048216241416	6.038691541111305	11.355276373269408	8.304498347375635	6.486516093540504	14.05089917622841	8.092234104864621	7.293554754654408	5.746942621743825	25.67970936428626	7.41366657823459	6.0922522580656615	5.651048655219165	10.284659632465333	5.529467130186586	4.949247103320173	4.913240393985532	6.588845059274662	6.861603503730533	7.1036926217719305	7.205151522531221	15.437999318956232	4.128424678322748	7.99857437573888	6.425930575279445	7.85323260529268	7.264221150831464	7.014077976154442	6.411154052427547	6.260669154051785	6.259884643234966	7.4858130189556045	7.016876052020581	7.757780131710226	5.660582461666291	8.292104351460013	8.879398847325165	5.769093346090685	6.341565087476272
C0_14492	11.307873474636047	12.157147479139656	10.69996866185283	11.356235436267252	8.546470383602669	8.523278999205738	8.425180364787556	9.599964281641888	13.164614588312764	8.856945768560289	7.737281782081234	9.012710951928405	15.075160066203992	12.04117556704901	11.03660632051065	15.40829728055255	11.50508541742788	11.628858069821405	8.773450404891028	23.8731592405004	10.681897518113574	9.87545225389133	9.28323745834719	15.181296399662417	9.414744435603104	7.985851620711541	8.629272782526565	9.389738832166229	11.940426408873208	12.975281243433999	11.64383340618418	14.954851176740554	7.110732962064918	11.12312495416332	9.0400083192481	10.815900012083915	10.380319901344176	10.234458825974357	9.591450004695718	10.32119858411596	9.672842607502396	9.897826699168291	9.670804679354653	10.027495577314312	8.670360445226622	10.807361640250036	12.011274098272645	7.896265923258745	9.584949918768702
C0_14904	626.2431698377951	387.61223243983557	248.88276413270108	253.24784280771792	236.66019616485178	177.64992422624644	225.1768540997136	215.3068694444527	522.7724992650119	530.9258155426248	408.9450851514831	282.29328542467744	255.43719577816316	320.1613231286213	403.0903097939007	450.3710322129146	220.48671540364228	450.3556986643963	228.1801727320185	489.34097903122915	512.1240191707682	208.82216088772336	195.610562025483	656.9239924614418	319.4121182702351	294.0629958720317	588.2765908567578	521.7949632961403	550.0092698049375	462.82462020878205	770.5463931057778	759.947559060304	144.78703886104236	240.66706427322524	236.80710057782264	401.30348973556164	220.84484059647622	222.16523574655616	252.3133846749403	267.9807205178676	237.42976740252539	193.60988575408393	234.43168080956212	218.55674964628187	224.2222459368569	461.4841497525956	585.4826318084305	269.195819742091	148.72844455850228
C0_14949	580.3924836417656	438.7112859187013	499.50647558459855	525.0352870692828	522.446710971181	413.61399495429663	525.3812918254755	408.1712619701224	435.450546085594	372.3078548903291	364.08240463813144	464.8177346192825	308.30383076342656	421.39815681699275	429.74231540473295	456.9455180915204	348.1514936266216	399.58482060387536	363.6232742004129	554.1314525172719	569.123908415333	337.3754655386975	370.0101952847155	611.634415515125	356.06109165316974	425.6308207860743	558.1535584764188	588.7245464805416	598.2939932964252	521.5216887261334	685.5695200669049	692.6966287983906	279.5954332476788	487.5272141106856	507.3859922925506	408.74938504242215	431.78116826457904	474.0505465958484	527.6586576773499	608.5322257395509	491.62447794991044	427.5623567599781	473.47538779324566	455.499117889303	617.6984473988408	465.9702508097659	411.78359861451685	349.3438724088815	284.053438124919
C0_15054	367.77433110943673	334.56447325322324	355.81943861289375	313.64494133911245	334.10339261984046	308.27649246091215	414.5239523781984	281.55316360652245	430.6442278174708	315.9064833378778	305.3261835706816	365.1787839359553	302.1185317153759	387.77864116854204	342.49661356190296	369.6271531972311	394.9538556455904	424.1580143243338	364.4302058730204	415.28941866698455	378.734266277428	330.08846293703846	344.62788627644784	427.6736893386943	370.9486834651004	381.1396415336726	383.7689624615495	415.61833004761826	420.3267122085299	445.4019757213785	466.9476587980871	459.67388410597545	246.13179257546224	381.57645309024997	397.62681685934433	315.19127697845147	363.5682383952271	344.8400897205851	373.1892019311866	376.825680696967	400.5601940554327	305.20927195672476	303.0189124029465	317.9329037661966	303.7853001271722	340.51723353659327	322.55033219335195	269.26031060859236	231.37344269002975
C0_15090	380.67970095992143	319.7413516205339	330.6593201043487	248.6727320924552	300.1163506652058	288.28073572735633	409.1032024953223	275.8311785681895	436.59667566932376	318.42978292407804	293.16380411838486	349.80810388232726	288.7450332186815	399.1131850672753	347.4483771556115	408.05922369147913	397.8118836494565	430.6436333926891	359.41374216116446	457.2569337150851	421.209979296012	318.8004381523195	321.35404636095035	444.5790746899977	343.65648571141804	347.1781008545122	402.6078768214107	464.3140693329992	454.69994603531904	474.82742925286107	495.9281828233317	488.3722549017033	217.622034565198	347.78498299884006	362.01934286498425	310.2714029236117	339.099179057115	330.8909909307317	339.81344613419293	347.86785770064483	364.4036815298879	257.0709287631627	264.47368978546973	276.807816418993	249.9232581497204	334.07537446472077	343.91852223348724	277.5482558680108	219.35438958155936
C0_15258	154.4143903427884	149.54915309136356	262.8565050804467	164.64961586781507	234.65227374052134	216.83014318840986	207.0387290402835	151.12998756836845	181.82071705774976	130.1295824901751	129.83569756408113	183.14073481753616	137.71557489333918	182.41869140133846	163.89232083541552	166.6305983229346	214.19913229005093	187.53687603310658	176.54340718573215	188.25888319984395	172.36533291901208	179.985540104275	225.70029049903343	174.61171232988144	160.64737596430624	182.56482712567896	162.5713343308247	192.8197537411579	192.27608282143117	218.04423559027387	190.48785201986135	195.29582100512903	120.87694473468022	259.67035226760936	201.61502224098876	145.1940632252474	246.77582038045108	194.02684632367863	188.1742228008977	296.737563574364	270.88026930839374	214.06687626495355	216.9442891125749	214.97551361290462	154.41819722639877	151.017973663568	136.6850202080833	137.45655232433552	127.11367614380408
C0_15550	92.28562204068481	83.82964201215665	106.29448960537783	104.49207613511265	99.06055457858939	91.94687975897271	106.42613560114006	99.28292661669033	98.06832154626244	77.89814609505082	75.21379797104534	108.24663086937697	80.68333641505492	99.49804527292143	98.7899372443622	89.7937398959971	111.21773011111507	101.07799428331411	100.25859342268927	102.10204570726847	98.24611392530844	100.8124177363497	93.00441790268344	96.62369173539437	79.16699747393267	98.30987017843063	89.60906052485521	106.30428687264936	100.608909528759	107.01133081863728	100.28827263456081	105.74431149302428	71.52861239706617	110.42222750478686	109.72979604020612	88.701904416451	104.76689424130117	114.0951291869922	110.98849622555862	113.49217441260791	105.01363796564216	92.97329282435383	96.11875106738671	92.62927634491952	107.38445316832878	91.83893298476522	80.02055027340462	78.46355910608854	82.78846845954594
C0_15800	415.1722881801941	501.2334015363199	623.253893900664	682.1629015717679	856.6650012796607	735.8642795043496	550.7987644838855	602.8964887842525	323.54897889418305	344.657310391307	511.8302602785481	622.6818716098402	697.7249544399345	545.7154431042412	489.52119235927495	227.81541707335072	525.7727881173489	440.4518738882072	707.6327558987567	342.22431424641377	325.68779184320226	525.746452673147	710.9191470063782	445.49349315044253	546.7449611950367	691.858698233712	416.10572034025387	293.28391576218587	229.14127094565825	308.44286006021474	270.5471953981664	293.94388778084226	473.0363826642366	654.2495507735244	621.3867910790102	533.9968568818136	577.8882208817614	628.4658251653356	750.4668669567573	565.6601747691934	660.873715499509	873.2141089731354	856.8454483812895	779.0910491476671	981.8569168664804	749.8278387090287	329.9053230796823	550.5582096982247	598.1430861789179
C0_15830	386.7140740856924	412.32217347996715	601.2772264718033	584.7758941817875	615.3884503601373	705.1032774785714	541.3348702991757	584.8510861207452	300.94460913998444	280.45113451949027	398.03751771795316	560.2633508775092	582.102969496959	536.70903519544	428.983945576114	245.32838620330293	520.911690218351	379.72770908947456	615.5253729470259	368.15391497342563	355.7771799398187	497.3423714974444	684.696377425102	402.8780057053104	449.7289785012982	570.8269156104793	367.7266465491548	315.01348641864604	254.27840790230454	318.8007067708562	284.1857961827345	290.4095820440846	425.18425162313383	575.4171564621537	568.1319769313724	455.72461052555275	521.7186671713328	592.8806012526209	610.1095329671524	525.9033013125356	586.5379178004893	701.0865268661994	680.140836183672	611.228461159582	684.0254647390066	556.7369455028194	306.05632308802893	525.197735219574	587.1714915285213
C0_16010	205.59682190844404	213.94602670943968	264.87250769885605	281.0340383135288	290.35773530980686	292.73418436561445	248.0444393070458	272.93144285935534	206.12894020590667	169.2615919433315	206.6874739548586	286.68913101437863	265.1161303257654	261.83395797693106	243.83083945028454	184.5917608007357	256.6802440785117	234.9207413355874	288.9827826885379	211.90820824745026	209.01573322953806	236.7680859285429	298.8930731207154	232.71883865297875	221.47790908702407	270.052022147412	194.41113694665108	214.8068482763831	168.00627868321462	184.70728754285295	159.10774681547394	165.98906466932385	191.76185928212354	264.790504130277	263.37643686785026	241.84099183858655	255.01014650847407	274.18128351265324	283.4260432044756	244.60670161424682	269.87057608727986	309.69448816403013	309.42834965708903	279.24146840252274	321.36264749900016	274.2562819455923	180.0684709914663	248.44965651533718	260.38250997845637
C0_16440	51.39276060463759	58.86482601014993	74.48101878021974	78.86252715571295	75.9054646219884	79.10851230676724	71.91972808121854	79.37511438433687	68.80364773087682	49.511140049152786	58.3487354908645	87.9133680853452	76.42203916674431	79.483522467541	75.64720994824705	67.11120572462183	85.85789543123991	74.59504771334015	87.33532890448006	65.61820762416468	60.887051268470096	69.31749393656698	82.58624244239387	59.847301422836374	56.82301769995573	72.85458735656287	49.00665621925976	64.07560753597625	45.97360168807029	53.0828665864847	37.486943389990046	40.83500626781299	48.881932873910074	75.9422848320656	77.54585575159042	74.38992139453342	80.95812978365294	85.17576430381597	78.98157179659832	70.7657499053819	75.7967303358126	80.63224951365454	84.92672468406607	75.62465839173767	82.12847720259789	72.9113482316306	48.61748157319493	71.2569398803147	75.71627250465788
C0_19103	0.529899946575608	0.5147742648959234	0.3130535904588346	0.5041614817674	0.39252940650533763	0.20060969466980189	0.4773673801257949	0.22031691019531885	0.417686464696782	0.37967682296596067	0.4107701760773734	0.35043678994428545	0.6512691566329829	0.4480762078234592	0.380559853125244	0.8705451803946723	0.5706266677937766	0.5914161609270245	0.3163930634886342	0.6198807156138236	0.4452347087670069	0.3751930007528138	0.3390674227956456	0.8124253374822651	0.3147218165490168	0.42347297189398186	0.3957968583247857	0.08673812180597243	0.31049827601085794	0.2557649845485342	0.298705676491898	0.23975085379866384	0.49932078673917635	0.3404069173216447	0.4261801030611434	0.47908758338459667	0.27745015909895954	0.316931717991035	0.30919587287445127	0.18943581946270965	0.4598705997705663	0.3560942471067957	0.03801666649279818	0.35117213397964964	0.1433800440813009	0.7359607475663644	0.8915196453738896	0.5407842528927549	0.27666779640803846
C0_20924	8.071816397018766	7.407031620631319	4.811418769781194	3.3220161943707986	3.77508551826307	3.4413635041361825	2.547130667176345	3.8591544751221294	4.309660458626298	10.31851457672653	9.084422345344025	2.7711098172493043	6.348191494839195	3.8009198598119083	4.52828018823643	4.416973154402131	3.320058999382008	4.410398127788561	2.411064687499567	5.576136860836155	9.75288516703054	3.748330212421928	10.674843940733162	12.915753755323806	5.829921052683934	2.4000721174140893	10.597603609139538	4.38259817512865	6.729490184364024	10.03747911245142	28.049297748254904	9.91491751560935	13.615858083110371	4.184093409928905	2.67685530101753	7.267090265791281	4.29476855112851	3.22076638930154	3.0394628974191567	2.6565673779582806	3.70046848294021	5.38503610453306	4.555255480404236	5.279133131161919	3.1829691593484157	6.60573257579283	13.533215745823727	6.077877850409716	6.361655938007342
C0_21845	4.7727189380331145	8.587991127573146	5.375878960030769	4.267177747297991	4.526994745733172	3.6744838974098926	3.3312996729714746	5.571636931388322	4.439894001723951	8.42609409689779	8.493891815714298	3.890566615546755	7.061347355199725	3.773979502494814	4.601140183160873	7.681746493987698	5.106750013839281	3.3014967513460944	1.5528783551018825	4.736810829499668	10.078313582510827	3.2517914889186477	8.901470391271927	6.510748077503163	4.76040825432179	1.981316401738687	6.489872018317134	4.854315750300386	6.208119482122035	8.251511818869501	7.878244654624811	4.708699353235021	17.445123478407794	7.282060071584192	6.835633367683886	6.161501461699859	7.3221997155145635	6.172161170599483	5.882526228617113	4.374444271613713	4.634447951820521	5.162348453877753	4.3306173511871595	6.155329361482179	4.423895693513576	4.335334036869707	7.345761843033799	4.51445124739874	6.63786469706675
C0_22903	5.425618910201729	8.598266300639642	6.771111918959027	5.631850907454687	6.46546765959174	4.66411287737874	6.843560627816785	7.177707003201579	6.0178522466125965	7.44135588707314	9.167472074809906	6.841686367146284	6.101599117145198	4.745619560110694	6.427315646958444	7.665284498678713	6.787547817119664	4.0728968514206505	4.338124463226732	6.499364808966644	8.480520025349636	5.1562404103188415	10.044759025594637	4.263616072082796	9.403560545055926	4.085598540134968	7.758485465386793	7.454959771964647	7.819452845629244	5.296800708235168	5.097755409729824	5.668240854840971	11.999318511869502	7.159343320378684	9.071342861865554	6.716939769121398	6.913234596782255	7.319916349379551	7.623042459852686	7.1358997564674	7.406502142000091	8.832353211850682	5.97032348552297	7.210937126703315	6.894894674307469	5.932036933440697	5.441064970486706	5.69510217330396	8.66148635857405
C0_23670	7.716646324995447	16.627762746665304	11.276717021759037	11.439028764987585	12.702392090608363	11.105256219762335	9.7376998865121	12.468336858595569	10.573461961341385	15.988025303528925	17.695462685332622	8.361363401308502	9.903207428152584	7.978514313921892	10.144701178733524	13.753973684373829	8.365488248930944	5.728525110559696	3.7161329024249325	9.224008521287201	16.094878928952685	5.798198896583424	12.286285779271452	6.518106065746291	11.76952641215589	4.541471493281893	11.406938321416202	10.176282339769534	9.75697566865904	7.936140100888934	6.1644083146159865	5.3351498583555585	12.509724411564477	13.132744511213364	13.201078690468504	13.847503015067344	12.847200640678489	9.985509795715284	10.512647538882025	9.667179169366499	11.102225147218915	12.788875827570754	12.118403457792153	13.04325212969736	11.367260477146731	13.58621645547291	20.739114141135367	13.467121807673369	15.306496216488652
C0_24391	4.477327168413586	14.541224584668557	9.855266082312674	9.569219006204285	13.668884698316145	11.31444786346849	7.478841429583936	12.06358869683624	8.440031200098877	10.429275614595998	19.364790551312694	6.54623689274112	14.295833314267439	7.751659492769168	9.316871182346226	12.243825412827109	7.098405282201966	3.2011774188177275	0.8690742634255035	7.817075247975228	18.883748321912577	2.3706186003358067	10.280766052233599	3.518098832269857	11.731847565562191	1.9424997623598432	8.783790707665746	6.789765856681623	6.5912216690334775	8.506049022086179	3.2203061581910903	2.109654539360424	10.86179339922689	10.522967546790309	10.317457131351583	13.37731239057179	10.865586797757848	7.6551442490660655	7.71152132446559	6.457708516009085	9.939298880270568	14.388702979827775	12.685951213263687	13.418269909920001	9.535386326702861	13.947569198321649	17.10574028338841	17.689045862300645	20.86212782060996
C0_26737	6.291239140964744	13.36371943463068	8.468786172408892	6.947375769904147	11.714512949748293	4.192555244908063	5.505203213026295	8.519995836992337	7.888754688521733	8.263664521354553	12.151851028515562	6.932286124557413	13.987665170401279	8.239025747812365	8.270394061981937	13.999398173559259	7.779751629858665	7.485858799862835	4.997437188952696	10.240965747183342	16.525105235817602	7.655086641194551	11.39130674198043	11.049914672924677	8.914697711765951	4.662366183108492	10.494799521229531	7.162247992119064	9.220373214291742	15.918124902678176	8.485065669887373	6.88569747032961	4.203226738674381	7.3011531404227865	7.307070221631661	6.564737494260183	7.464753172359027	6.599272216765088	6.2515796274739275	5.1977438387443575	6.598601447783121	10.191196325414042	12.633797914852165	10.835486822210841	6.359893306547072	9.664882562613416	21.729309445124915	8.706843171451752	11.825906887017048
C0_27965	28.562042572789892	64.35622682425598	30.248794030671533	37.72644736773871	25.9485038274113	28.103386237734362	14.890791793269523	23.507002284401533	38.89282386473601	33.0377965987227	40.14014117363624	19.616871720560397	154.15603102607412	60.62130089590292	29.37364791191951	113.92384740002001	41.80775707637229	45.50424069880645	23.640485359796294	50.52147186413034	84.2271072183108	34.47118812420666	20.674301186082197	46.91826488943144	22.463422518521103	20.242785982816635	23.638347056222177	17.830709456983048	18.964906069360026	85.54491146289398	25.72233848523511	31.93925053847359	6.413770207422337	28.05740097691734	16.317279306094385	70.16733439105681	38.93139270978757	22.615143547421116	21.19025547507519	14.426929734559996	23.274056093989138	46.58164756536495	40.07265836293027	42.95545542478939	18.565372267474277	51.03095001626681	148.12830319770603	70.44021388701255	49.41546835095712
C0_28161	19.454767978028993	37.089795033981055	21.167355264070252	23.987217891315204	18.00905490182165	18.41446400894767	12.664018024942687	17.599516633871616	24.75874881364359	20.795992525753032	26.634252148303382	16.09551135574794	78.16742914295433	35.13074846583748	20.426473505915197	62.2072033129702	26.676997045216265	28.343137096901046	16.15259702737889	30.030455973703752	47.565553091089924	21.486861263488098	17.714189201699337	30.960307929555253	16.56272750636008	15.842872217812086	18.42319811330505	14.977865835709624	15.534578121506337	44.27772375187317	18.14879319817603	20.792930323579984	6.423186063840803	19.4238912626559	13.900646792991983	39.373000076773494	25.14136717241824	16.873496460798872	15.687930620101833	12.121399523312933	16.383229375905344	27.59340622033746	24.665441095256096	25.836719475638343	14.453427265366745	30.442358997003893	77.32676532419956	37.557148639543904	31.017574047241215
C0_28839	23.72088498689468	41.068261972923096	26.226993963936174	27.945392158808946	24.22845895604964	24.97350781748403	15.857593414688623	22.11246976701124	30.389845091596516	24.98760389870237	31.37484514593889	20.402441110899602	103.07078494644023	43.17891742091963	24.301739105911963	73.07024527492496	33.429305717741194	38.18834364402942	20.634767317722357	43.720972528685465	70.92476834194281	29.405338040017128	22.323032914189174	43.01922462243796	21.591782752331024	21.96024385023095	22.468485228496338	18.54059879059401	19.700978356180148	59.71380242676662	25.18280397192613	27.150898636060692	9.670930227288144	24.339376340538085	17.46100943482248	48.25327690397807	28.88637373856612	20.70512807349229	20.16031353963687	15.342082148030878	20.993623112108725	31.88633077867621	29.844585548613967	25.85246053358061	17.876393402551447	37.73846099344417	96.24669126281238	45.77950660301385	36.73925970349951
C0_29021	24.835776031760332	34.56464222165942	26.660196883967696	25.463894724800106	23.737928126456964	23.663765654158116	17.171501414631656	22.568503946647365	26.638146220584098	22.644624396840385	28.132070394299404	22.19580405040557	65.44149425595893	36.37798759197568	24.75416476987136	51.225496806600404	28.579776688642447	31.398956550639408	19.956492186986445	33.60951512256277	47.823301292431395	24.598777845093657	23.546044622582226	38.038557611235184	21.38669141462339	24.283963544181148	23.33807672431333	20.29844544413293	20.282891831578617	41.545145534041616	24.58593472726051	24.803674066864797	11.26445967979883	24.106510088942674	18.905319991221383	38.09941976639395	26.496713684210995	21.640229554058507	21.468628196162825	17.03914420122067	21.034632291704966	28.66325951243546	27.666064925690684	23.442902633060278	19.11637724558398	32.46004106766683	65.46556014442359	35.97995290727545	30.37274040388025
C0_29711	131.37848584291035	97.04235945879874	87.75742433512947	88.16231714004132	76.57490597679734	79.23826225246155	86.05476016278871	75.92263934537694	93.72604716396381	104.23189732927742	79.68628316666576	73.46577794383373	54.08867950778338	72.47163412609696	81.76137141016359	74.71730120907647	66.47153178913405	87.75558222678218	94.32396806178485	91.48276625903668	59.84319309600868	104.11689345731892	112.2856804875782	119.03330012725945	85.88527421014881	102.3124052929129	125.93058906019166	98.33365600453556	116.86240482886218	72.32381974148792	194.97158639557898	169.0312248138534	57.017822337343226	87.51545479516803	78.42017149956993	87.81194657210868	73.97266795944967	78.60436309558207	99.9742088429752	90.62028235419999	79.68693375475642	73.62092225833165	80.67927972252278	71.06495312371129	84.36171090222136	82.86778768593999	87.83721456753122	65.84667056342086	56.99757801837043
C0_29869	128.80762490034752	103.11702619595978	96.37142106241726	92.97123450733382	79.6785209537739	87.89854521873947	96.58576238381488	78.68612102760301	107.79366018222899	107.969297729487	84.95883786118183	78.50926565784415	54.90040799534064	81.59963700376133	88.80303555795683	85.6375116570935	73.6953311426084	103.90024228714337	105.02668313972514	103.33206082445733	66.03756656658908	118.29233061563737	118.77630647078551	127.91704299272321	92.84207787180763	95.8612864196176	129.83877151901558	114.64894201807276	131.80904265390063	113.32373273162808	180.0105831750495	161.3085587625038	67.95171311192513	92.46613607332398	90.85594964632301	90.81194459223671	82.23095199910712	82.59275327763984	96.15835773185013	94.30278543096597	89.76575180908718	73.5321365986062	80.89644302670168	77.8706487858817	82.25700493327479	88.74356831827909	87.81604586609112	77.01770710296859	60.195808909858144
C0_30743	132.54840519892423	111.2990678047866	118.7929039856774	115.57211474979952	114.44779182434253	125.772728143374	110.56932637421887	110.47394664160926	110.20286711279606	111.33310133482112	109.54838158075192	105.65814535954856	73.0054441990309	104.51746587456142	114.9771374371518	80.89334092708643	100.53473777836038	114.039941070065	116.33064335783558	107.72113936816524	89.09143658660601	110.15463037248783	124.59575466396589	123.02744861856652	116.94822951025228	129.10741637632876	122.40161413019551	116.05751101981917	110.78144492128057	109.4226855076373	121.9690269607517	125.61240727465055	109.45003169986046	113.1324274724147	107.88784827059558	112.1849814592808	106.82527716875737	104.28133442142963	112.89786741949206	109.56619405624761	115.04584861523726	108.85660821916593	112.67436323132313	111.97315300897372	112.78501588236769	113.78120250219271	79.83960075530513	115.9146695307477	97.44058476843908
C0_31527	80.4044427611955	75.41283812820443	100.17682930506588	103.43797543519217	120.98566318937554	126.28066947969982	77.58340471963693	103.7423393399419	68.15149883070299	66.38085239195189	85.57243847616172	92.16643875580915	71.9013288361596	93.02039759214122	95.11790403667162	48.493024516339084	84.9680642233744	72.82773552269032	77.19801130657358	70.29323601493557	71.22733472963085	57.78978754048288	74.02419936021306	72.1374077644473	94.52487156654809	102.65641693290213	67.66417533925369	67.17429740196302	54.44921125562926	64.47730887600731	55.79263234106251	57.56018419835301	80.4473449448768	99.17738849781477	81.20883146202273	91.36945177649903	98.14709361118015	89.11286173850625	95.79501375981204	77.74844083603665	97.31364338557297	125.6616671166927	132.24862865353293	102.68652746168469	112.63615072126721	96.89611091167629	47.114836594597875	108.75377667645158	109.23631477340055
C0_31642	72.28716113189664	64.83578196266944	80.84930478021901	84.40770061585835	91.91892256906776	101.25863716885752	68.38423110519781	87.4611212806784	67.15476858937157	61.70421467466203	74.1015336706019	82.57053075050065	61.906831409224914	82.77300797788897	86.75128211223789	48.25953716083592	76.9180791197973	71.60521797090473	78.25854367137445	65.87491425732404	64.03414185324611	57.783015534999464	66.03161624363067	67.99624037200178	80.28399636388606	88.06146467943813	59.91075000937092	66.5454914546698	51.5924504091726	66.25071300768613	50.847532860015434	54.900748920850326	68.83836332709865	81.59527595242594	70.00936162995843	81.90460842857813	84.26936045373458	76.1520173939315	78.05083321556558	67.14781424097002	79.24138944968146	96.499595204258	100.78748272204083	80.97456015298512	85.53738938110814	79.85082636887044	44.63225259228792	93.54648231632493	92.79628600031856
C0_38518	2.8175294427559927	3.36427406133809	2.9362261058378243	2.796898804165514	3.3679267484672764	3.4876176750960597	3.6417946287960894	2.94223551854496	3.1913755370122083	5.022419783500309	3.8846772257949866	2.7744355346687803	2.0582091312185122	2.175602452697325	2.5821135574625966	3.2084700038863443	2.391399908191949	2.8916508344122454	2.1616810074352815	2.6742620114906575	2.8324962829457014	3.3147367744228426	3.0264122678202616	2.389364423033888	3.467199860368952	2.118920092251049	3.310394880001809	3.66691799896126	3.3556220467765066	1.8760644847879784	2.9177436203778306	3.0391942367220066	6.26460212246397	3.4484291935342926	4.203400243191996	3.7149738634069376	3.0533356936857317	3.0885780349767993	3.454507795701249	3.6217324259094785	3.7234273929368396	3.27619762479335	2.6626906753238573	3.5453328033699214	3.3648928602394808	3.2277539445136925	2.4040005521351953	3.4336581243325597	3.1967171940109056
C0_39501	2.738225719226586	3.6214100210107967	3.2045306821306627	3.3279544641040535	4.010015553794426	4.282418110184545	3.4451652225625473	3.48512219248825	3.2626653331265545	4.961634994569317	4.633220276146451	2.8264919746127193	3.2577612741093467	2.480828965962152	2.9565796380582294	3.8218787916199655	2.6153245955741817	2.8868936360379114	1.8555625535302356	2.7153683864053164	4.159915666125955	2.9731766835613764	2.9978265772445605	2.352963976456602	3.7810484565395326	2.0101884571005777	3.1116728597400725	3.2791390954344677	3.0063265782776374	2.1744727592579323	2.207222162230752	2.2519421054946585	6.203367853499034	3.675019686884676	4.374544830550979	4.711326210255915	3.6518999865539343	3.2569734807958968	3.3326967629989945	3.4077509608552288	3.9514698099000443	3.7942002627301448	3.322714014811707	4.137338724243201	3.5854883446787773	3.9964943687113843	2.981495123274464	4.808246260984945	4.515867974516435
C0_40430	2.152787744008734	3.0339573982723174	2.7719005673430384	2.625057610162663	3.6220227778645993	3.9439698081938372	2.7207955775716903	3.1262136156893776	2.4636280231959384	3.701623580521046	3.8607975377212425	2.6491132997824103	3.340583815881625	2.2265286041813495	2.4899179354525995	3.5061617518883654	2.2988364234759793	2.547489146079366	1.660171473785474	2.3968324798422116	3.664038726693185	2.6941433571981768	2.6346339815859	2.479875058743231	3.401093432311311	1.657569374197535	2.3754634327422584	2.4698190044411574	2.2710325202286894	1.972446148161269	1.7893252715773835	2.0569015064302123	5.305471566809891	2.939511283543724	3.4959862077479236	4.082643419167092	3.0210439775690965	2.623857099817112	2.624140919446006	2.47359425185017	3.1219592096422812	3.6451358567916325	3.070809626270922	3.685679986569038	2.8701102533983884	3.196417828199349	2.724034636725931	4.649979659433177	4.5411752833530645
C0_42841	5.998764852258639	7.722679431052729	5.504593082790763	5.362627589510542	4.9829781895893515	5.675317611743434	4.332902025232674	5.2612089606191255	6.303439774486599	8.068329217987216	6.026278447974514	4.644627741543446	11.44532037347151	6.931790556625061	4.781902649547843	11.779371703504603	6.54452999112032	7.892265988184774	5.56413291983404	7.4051366574373585	9.37936824254981	8.371032979664037	5.066707968821223	8.37754509702294	5.1115183332173135	4.457491319310561	5.595451746601711	4.531906198527025	5.539800092489351	8.365344620832234	5.730921106746848	7.01103598011336	4.774939238751294	5.286682450991215	4.540831652848434	8.461854572685365	5.642706556030541	4.586818262908352	4.56729589242714	4.0334270105218515	4.9856415452980904	6.244017347594718	5.524564027456503	6.749364250368939	4.339748458773643	7.257845713230402	10.951106659530184	8.898253399392596	6.335468561893191
C0_43654	7.738311701486823	8.861513783218808	7.361459198112608	7.072047394989994	6.820428609898914	7.565279636760684	6.14737549748313	6.522802362033111	7.827619056151372	8.990483145833696	7.239385071132104	6.603861510408967	14.679289358376499	9.116717619549027	6.523913876220939	12.681783088368917	8.965327943976135	9.352343636628987	7.396509728753302	9.640486880462385	10.84992538112481	9.978026655757983	6.369760722496648	9.965157506779581	6.57447156366744	6.55546983008526	7.001997435491927	6.318926295625253	7.201070272524979	9.180517636357097	7.320595446675523	8.453036983013819	5.9440903078698595	6.7218966117085985	6.218854853808634	9.949681721535914	7.131625688461201	6.534349382212517	6.438438180870011	5.855395546643776	6.865817256390138	7.9588515917748275	7.597868845815583	8.44478040760558	6.177598555401325	8.935014943045918	10.908291931126325	10.272800501747202	8.302856853767224
C0_44834	25.06283267301968	17.206925493460528	18.740038431456316	18.060678389759758	16.38489802768516	17.933295983595617	24.52226714971163	15.194639615371656	21.596206954505025	23.13364793154215	14.328106234919506	17.38340554410912	12.915910001944276	16.235272155061736	16.0176623387231	16.16604295239247	17.203991002922955	21.28232253633818	24.020252620986007	21.01307262389112	12.634397738979692	29.556408185333524	19.372710503311083	22.028009888845734	18.64021470692086	18.407330863557085	25.88573286661133	24.745487502280735	30.08375268204854	18.099802655252724	34.523409986030096	33.18199539071764	17.125352037289467	18.069986400023833	20.96846964720463	15.631174227694167	16.056571847111346	18.982567669147894	20.788934943257956	23.324707180732027	20.682480308369477	14.152242477159486	15.690769753820502	16.47970593908065	18.40326455735027	16.950520874928717	12.4993314784311	14.316021436052589	11.297179219714433
C0_45681	31.836647960361322	21.82701659061955	27.252356379538128	27.163570871566765	26.18165308130425	27.336774110628905	35.057172761774794	24.748943810547622	27.69764507108334	28.74369093273926	20.5676231815779	27.318130764713565	13.485822057955234	22.305311462718386	23.838109733700588	16.675473621687548	25.464267097173693	27.357953894267037	32.41433869501876	25.94027590026941	15.379642688501919	33.73071914169494	25.44957250063442	25.588045019904854	28.01074968864282	28.98728517055263	30.807335885120747	30.903098747833734	32.63747399065818	20.705597265691978	31.56524808523815	32.914092946677236	28.595125113309027	26.308784313625683	30.491655595715535	20.401744285648547	23.663178403628912	28.652961653118428	30.859331763180425	34.267167006658944	31.646226535373494	21.86743210282166	23.800463513550135	25.653226967072793	29.591810709656315	24.236042617149074	11.856931759110934	20.307737170997232	17.321333865330946
C0_46406	25.344890462601526	18.69108530911981	26.34888897651859	27.446145998627188	29.123462582719824	29.76312407386926	31.29555997206154	26.923811143934238	23.877027785985746	23.248100655140227	20.198347948751746	28.62661458377004	13.829689774999876	23.44142259052038	24.859135058867775	13.643960702283042	26.356637187800814	24.171368209865314	29.942783411425	22.370362908043152	15.488033084760136	25.19594141838073	20.964884582127862	20.584527687981115	27.105285827317157	29.612197564161384	23.16840669836889	25.24730389002761	22.97832723697281	17.100675049073235	20.486227860894672	22.867604178330787	28.40958032458166	26.460653953149475	28.67769298317677	20.069254830865628	25.0198478765427	28.705442614609616	29.38252185688119	31.369087271781407	30.82968392216732	25.434222396623408	26.581491984521485	26.70467635582888	31.15979461740303	23.923526719008237	9.375052071702086	22.45497261974184	21.18119887238509
C0_47146	15.294382373308952	12.008096694691288	18.74217988013433	20.978605113907214	23.238373333132422	23.585069979324505	20.805670524484945	21.001033988818765	16.667667161516533	14.589721268373784	14.579798720881968	22.135664600490585	11.401499920956171	18.64727963582573	19.007351279568134	9.991746655815998	20.482448319813766	17.072074035228653	20.92922585277568	15.078652865398137	11.667523467425243	15.163338281629809	12.868461391976902	13.298761440452033	18.573210759304224	21.929264147201735	13.153722457508561	17.020030702934786	13.207321585888813	11.485682091732086	10.867770729944045	12.59765013808376	18.72619408756489	19.64431682707672	19.35382599467569	15.065547812838686	19.8482398335802	21.216293416759754	21.306032295270903	21.04253047253321	21.436777668688684	21.62624085507325	23.75553719279034	19.774346439107937	24.35509861209842	17.172394422483087	6.185394577328144	17.640419264386015	18.495492993556976
C0_54572	0.9785676688045208	1.071599551964699	1.2057136450279637	1.0225502149337826	1.7317092045123252	1.5682826903037494	1.885511055514032	1.3303686228960274	1.2558631763331534	1.9125229471876004	1.5710497997357433	1.1497434573859884	1.444557931342707	1.1213712220335543	1.0680829308023614	1.862894736410765	1.2815214540092585	1.2646217887685005	1.016575688448896	1.1244703760839847	1.383483608586133	1.5024744041707503	1.0946677396199784	0.5589248301305817	1.5612695016497147	1.123412584011273	1.1913228314142423	1.4990551646184482	1.4043228267067012	0.7744801220155549	1.055380766313993	1.2249901320760535	3.176270882319607	1.4609182132415017	2.0912435746934976	1.2418174305545813	1.5194959274412545	1.6915944179589086	1.5698019050573782	1.9099356895708484	1.6878857739023492	1.502698175750418	1.1792302440308664	1.6809247782849526	1.7553436755860505	1.2627221012689234	0.5370404902093262	1.0522190683945831	1.5453501615703849
C0_55896	1.2549027049735952	1.7835483011598945	1.4077276496699593	1.6372264785968496	1.7794419676552058	1.7577356271210192	1.6321990717355956	1.574712241949435	1.6174130949129621	2.013902708667825	1.974119507919624	1.5323779194162697	5.024681431961874	2.141290425866015	1.3873808590103922	4.091176051325801	1.923443743940172	1.9920906981523967	1.1500109391657485	1.7725838324822336	3.0432808945002487	2.0311390562461846	0.9875880872984254	1.4811503961296748	1.6621794731343105	1.2202972940137575	1.0436438505631966	1.2878722290699574	1.241791880657791	2.4008109474716037	0.6724052168002321	1.511083941106084	2.4255063410478837	1.6035710153654157	1.9005470216120792	2.3679773889385958	1.84182691795581	1.7029067635613275	1.4117243463777158	1.5451935244447332	1.642200989556423	2.133113231691423	1.6330777654044364	2.0545658594878558	1.6011834303887271	1.8190774883298289	2.832850796990309	2.23617781351037	2.5162675893257855
C0_56674	1.6493165277193726	2.0730855920575046	1.6177383734084498	1.6449542611042478	1.774362734401174	1.7035934912176065	1.6112014388067237	1.7546589072272756	1.85531345612233	2.407234239455965	2.1030980481849757	1.758631839832247	6.1026853291395815	2.4966051245302303	1.5961694651386036	4.774962395383197	2.256682376865116	2.6661514824516144	1.628089529740339	2.2319505783371647	3.8315724050388225	2.790589804636169	1.3464914391740512	2.133249135535305	1.776059987290991	1.4579581964392838	1.4496342729232432	1.397750339158812	1.7354815525690694	3.1919273111638153	1.3633864920577135	2.1272177322482206	2.1580482869402298	1.6178403386600124	1.7823860090263253	2.7887251682863368	1.9365751593041316	1.8659453291881296	1.442135050222764	1.5228074832801306	1.6875705390961568	2.0752366973126506	1.697243931045961	2.0559388242266894	1.6349157111409351	2.1942787954568144	3.7351747882453505	2.583025824908163	2.634566053409217
C0_57776	2.5951016145785992	2.6913489778668636	2.2794380898734103	2.2500773621891934	2.2156081899668894	2.165237274432912	2.334854840647593	2.30833165968173	2.7365018730554747	3.4168702542986025	2.3451228973115597	2.3540900184393743	5.2105090522911945	2.952039744929213	2.0598882334440938	4.953129396479605	2.873664543138928	3.37589469694947	2.718308600713227	3.1627805026230207	3.871544947592824	3.9322425605323104	1.9371990087327469	3.0529065373579654	2.292133469928197	2.1953822909076486	2.270680433754264	2.158320662614867	2.685940184731693	3.249531945576806	2.222954823540289	3.2390349572560506	2.4455941916589543	2.1340859997148893	2.256902669270678	3.169770480839283	2.3781040715824466	2.525861084642192	2.1090922814226074	2.2178042535989797	2.253270860637517	2.428433920929616	2.2264549585157476	2.8235774947855243	2.228115796190653	2.7931594357446565	4.0238971447056535	2.878476038798954	2.706306307875118
C0_59498	7.624406631709508	4.977651559676875	5.640596781696108	5.752269291998471	5.25623683909341	5.153973035890953	8.16580091442358	4.858331579710695	6.704910564733739	7.370269258920739	4.241287787283179	5.913025097724874	4.984856405341529	5.397428586877441	4.913914587966847	5.532008014278911	6.017287810025933	6.969375465524758	8.123811562712056	6.814398482985911	4.075839215306585	10.5761810840356	5.407485530966274	6.312226581499424	5.862744995894021	6.335859340335113	7.583787839932566	7.6402372818523965	9.537848803974503	5.473584237408913	9.809607520758748	10.45325445188284	5.940042253354357	5.511869405493272	6.715804132868954	4.653199196466428	4.984933347650286	6.737663105818101	6.922711102208829	8.205869890223173	6.560673059091558	4.661312059045744	4.895903530888232	5.664177551184747	6.529670723632441	5.4024713272989136	4.287969746097335	4.336678343280618	3.9114403080827285
C0_60516	10.163407685046595	6.334887048062713	8.6149222512999	8.652139139076052	8.417828894880154	8.061134924333514	13.278410682611723	7.7011493303986045	9.084529631746587	9.29849285984885	5.994117650524683	9.487508283283912	4.641290712520331	7.52301695805107	7.488322039988861	5.550127985357994	8.793846726004505	9.152051609317969	11.714131762427385	8.776636611192801	4.393162513541367	12.930377343263736	7.419330811746056	7.635664476588919	8.944445758605243	9.919019505939206	9.838965742917852	11.060950282970133	12.092777506912899	6.239041447687632	10.348139800633842	11.571484470325787	10.326866183565388	8.391403500928172	10.903561197715357	5.555767480012391	7.472667690047951	10.526260518775329	10.686689800086146	13.338396143245907	10.77390251967871	6.782641699907765	7.144759149757297	8.30056634132429	10.371758598717173	7.309492499139058	3.828798765077748	5.48107666259738	5.183605474624541
C0_61195	9.933471581911475	6.190651750637567	9.506661975412598	9.991758508322098	10.313408782632962	9.717602734725896	13.987832972440769	9.3066271373817	9.175959833581468	9.089341682878908	6.537287611569528	11.199539893345397	4.296248156258701	8.43579288118613	8.612936310877188	4.913007339187295	9.889134604641317	9.280426342044915	12.35911283389691	8.6482656558827	4.534422848819222	11.618101931671452	7.489060349493096	7.141735275723721	10.082713744873695	11.552322658181975	9.043807355829458	10.813566721490012	10.548432978331492	5.8324289766891955	8.294404749727104	9.89817568935103	11.815963757409932	9.484689665749967	11.593137486597884	5.771839158208904	8.680800262412248	11.910915389251349	11.878534740777344	14.2905201393654	12.041442735402917	8.155130587510241	8.624892612146322	9.679216991929644	12.291828471320745	8.044762321893833	2.939716790531094	6.272769047039567	6.24659923035646
C0_69208	0.31446275308194843	0.4988247594135481	0.4791236038694864	0.4117664855392823	0.6123982520401513	0.579722591929378	0.8866057306918596	0.3508285055938954	0.44363256138665025	0.682820561203569	0.468609224097641	0.495903781333355	0.23393369656677696	0.2594594547636218	0.2737169596319451	0.6546395685016163	0.3520723406123267	0.4432246755217464	0.3407888092456932	0.39783641954366405	0.5671429146144339	0.7218167426290573	0.4223522428904297	0.2541307883205637	0.4594012220140495	0.4666359089713722	0.49304481786271864	0.7043330672128486	0.5653873973907191	0.284677256708577	0.1780193208683225	0.450582403058596	1.6187305409421828	0.491035992503874	0.9641432906893701	0.16111510833123463	0.5146262327627255	0.868296666852941	0.5540992714141221	0.9059677004957382	0.7390949839757933	0.63519729838421	0.29895329685324357	0.572908960096036	0.9143979091723595	0.30048578214907307	0.5646770612149072	0.4236257317143111	0.15590030521278947
C0_75655	4.138713684611659	2.0868058659905016	3.200301969809198	3.3673109019721785	3.398094269547074	2.8741680415009556	5.634395319640712	2.933782345646082	3.5844152042331303	3.6500777654700873	2.1612166944720466	4.039575009069811	1.7326314456836363	3.108310634517302	2.926037866416551	2.0484149090121933	3.7100349630199023	3.6265015366012854	5.090307067920231	3.447553946706062	1.6132022331408944	5.648811946292484	2.8619685946426525	2.700196887883386	3.64276592429881	4.095676505552279	3.674441138318402	4.567779786457045	4.964900335693583	2.1460573549132906	3.8011882604367617	4.5422622550773255	4.47054712479758	3.188741801958649	4.446880871916027	1.742992839578634	2.8202340861535937	4.5062455910591455	4.8191006794100035	5.955609970653259	4.329785411036709	2.4641509492472764	2.5737520063851327	3.3031075500526756	4.569387985801596	2.8931207671759727	1.277130974398231	1.825754557848168	1.7737395343009534
C0_76247	4.035938807408354	2.1845562159639664	3.5058693115480595	3.836639292504128	3.932294184822988	3.4738286311988156	6.267275868529624	3.464257175658976	3.8765944106191315	3.6242877308404893	2.2885294466614687	4.600274509340349	1.5851880820399424	3.4276628661718624	3.3317621709079224	1.845071319374266	4.029081613322012	3.77917099635955	5.545142334009631	3.6153685262517903	1.589468740926619	5.4118410040379334	2.7819521042272024	2.6916196373802013	4.041380875166038	4.815756751135833	3.601024802976152	4.766142132150537	4.76183258623891	2.1723953618365623	3.413106900662002	4.0719868839415	5.081943782811669	3.590586053950472	4.8942083627437505	1.7668774880008506	3.218965025212718	5.001893100098397	4.796697801722017	6.463784019431438	4.855186598933622	2.941819257891538	3.0154587726132958	3.721730123957162	5.21308533982272	3.038274404578952	1.0065783453563688	2.174032322845707	2.0820572415879273
C0_76833	3.5914027633502825	1.9154936215349898	3.446055299871101	3.925670282617992	4.198735648834058	3.6774904054994013	5.828311316587115	3.5856188529440516	3.562486733225029	3.134433608938486	2.2901254271249876	4.6922436486503525	1.5165641182727547	3.5181252128959226	3.409071259399742	1.590409276972141	4.068123381271613	3.564086322103186	5.3687362475429685	3.285451232318144	1.5691536090156306	4.606807811379929	2.424666929720734	2.399140351550246	3.9916668874539356	4.878493419737599	3.0916847000753163	4.401995082588039	3.918785892488499	2.0673667318067306	2.6151510736054737	3.319516209541708	4.889136562132988	3.593252199287435	4.633797088450768	1.6451155218700682	3.3262528763205754	4.941744640793674	4.799129386143167	6.144284532966329	4.781046321257602	3.082824390761366	3.271242595968312	3.7256675160412907	5.370864459223986	3.0394217549487372	0.8198874275518303	2.20127492739108	2.1801620823219583
C0_85205	0.2575919920451154	0.31965768939557365	0.2301426905795344	0.2987596095791661	0.4278798513222424	0.29429739979205766	0.5173314375959085	0.20095840218239658	0.3653976020591578	0.36246908666935734	0.4272719611809012	0.3689509992390716	0.780994592037752	0.34570467043385406	0.22834618770742043	0.7197349729937973	0.3191440617043013	0.3544466111170778	0.23268955217018733	0.3647297210310463	0.5844429915412398	0.5034160384389001	0.21337602915622814	0.25451464259119894	0.3300718272606349	0.24676600548314576	0.30483447617070386	0.38261417217294297	0.3357572949839664	0.46525978784417543	0.1729215813789931	0.3218969623850892	0.842573690757071	0.32093996269302216	0.49652294372925765	0.27587809612498015	0.23037470101253518	0.4256577042550357	0.3167347555904206	0.4698294560930216	0.41120202375545334	0.291476678130578	0.22487552273964148	0.3850344567849705	0.40289333348371403	0.32903410681930206	0.6580111977461716	0.3836164147501059	0.2534627787145274
C0_88832	1.1215255231985153	0.676171146166725	0.7416763225341363	0.8525864617359258	0.8123217090592052	0.6452270085529155	1.1878673287590178	0.7654719215602157	0.9992268196521221	1.2123574491459812	0.895905098365419	0.9711885180087797	1.178816254964956	1.0492273110394108	0.7165343269841983	1.007871346298417	1.0239124559646853	1.0289926242877534	1.2948184237445843	1.1328578975649455	0.8922466898622725	1.7477965233803987	0.6606649184785061	1.040471345633381	0.8679086875621973	0.9812616708642293	0.9492715732465689	1.0402483399085927	1.3238048444468786	0.9832836825483812	1.1426723433009396	1.5219874308160195	0.89752054800981	0.7570459053837372	0.9504487757313976	1.2201423261422026	0.7289371720187959	1.0453478340875797	0.9603999855501774	1.2106754097372825	0.936148358289692	0.7597842388274544	0.811870296097152	0.956714407401056	0.9527234842226331	1.2321354373556754	2.1127251369796456	0.9109075498168584	0.7594694058835642
C0_91502	1.921793969283688	0.9054259715411572	1.5828790105593227	1.8414214802475977	1.9115905472267	1.5880505983505022	2.93160487125674	1.6048294277702821	1.739611155962083	1.6453504933511578	1.0393244539895414	2.2953785384511964	0.7986855192567044	1.695075704234272	1.5257635367519218	0.677917751869165	1.9258422212263613	1.7357540789749772	2.7387829403023893	1.626476156704898	0.665672891989909	2.785520582687402	1.275004913249208	1.2855655820986507	1.8745329588846162	2.3652630144898463	1.6732954901559518	2.3236277839164567	2.317146789448096	0.9710071736447988	1.7643017803137384	2.1369472838449037	2.363870356681063	1.6524273066010138	2.275651383932382	0.8921841006303993	1.4968587710044963	2.302162329383898	2.251815011282727	3.153258061307298	2.2624200105021304	1.290617213924349	1.3702539437978394	1.681170758244968	2.6170069886808767	1.4108947700461758	0.5609109088932286	0.941715157023838	0.9451585197282888
C0_106449	0.9781977293022438	0.4186749015583475	0.7499378269924761	0.8991150318167154	0.8992088696032278	0.6712909514557097	1.4634835874133911	0.75144118571928	0.8024851908720315	0.7286314214539517	0.5238259386420477	1.1210614075001823	0.4838150954755722	0.8181120745756546	0.7146444002119133	0.45944998018166144	0.966521098991755	0.8546731295776111	1.4509428818864085	0.7789470005809467	0.39277128831173685	1.449384214731984	0.6175847709053474	0.649388153468913	0.9293151894624283	1.2634067602581447	0.7784781271709511	1.1845399977464528	1.203465682750008	0.4314964102440037	0.923358871918782	1.1215359876851585	1.135436288982074	0.7672285599917955	1.1157710101168081	0.5180836538382113	0.6797862564949347	1.1673645881528443	1.0950446572841603	1.630041396116365	1.0741404673264463	0.5747526575912707	0.6446877998837179	0.7973285678878109	1.3328368092353384	0.6674651575164385	0.6495242101659502	0.3989784958276849	0.38620438943265034
C0_113294	0.03700644376076463	0.01836886589893946	-6.43598817090216E-4	0.005795893715066419	0.05283098903863221	0.03655003742307209	0.011291140827222693	0.021358510283115934	0.010129777758011266	0.014293842105190802	0.11622290645052069	0.010642451325807578	0.10252051511850876	0.036033719228834936	0.02519285936407895	0.06088874569758393	0.03738179997633099	0.056549079035131775	0.016007166575635112	-0.0015015881934463764	0.0908550337067785	0.011681724390071584	0.04669767179745471	0.05137538470299322	0.004696372188301143	0.008021773582570132	0.026728482363780098	0.025038761042245516	0.029096676462413016	0.08095557977040874	0.06449323187038826	0.06062358440342633	0.2177903013788756	0.0018381925660803731	0.031770817769739175	0.03601800260063644	0.021401253582792323	0.002311571791947492	0.04356925635952478	0.012900390239210571	0.0027698704105390834	0.07169694862630387	0.04229213201562814	0.0734831604605335	0.012221878594634026	0.04304477100665502	0.12771191427899406	0.015308773396306659	0.06393008121482087
C0_121589	0.5127472277571635	0.17101103795174474	0.35251375045103717	0.4344936291513844	0.45782889731468585	0.32872529976890186	0.7811067295722949	0.3589177391622359	0.43428956494190535	0.3658001443566072	0.2810709248994474	0.6252017086879956	0.17972934994706322	0.44986581321280195	0.385022112383372	0.16998510703814054	0.47603576637230405	0.41755251448520053	0.8261745042055549	0.4214672099251104	0.15218473191165469	0.7444447656384771	0.314264009209718	0.3286388623319321	0.48227054648122847	0.7259665374622514	0.4032238672091752	0.6212679198389167	0.6370611158447637	0.2622773655911247	0.48796631510140936	0.6430351872273675	0.5603864138342866	0.388269001874005	0.5481614288206299	0.21492685231672826	0.3218370203028166	0.6044279916935367	0.5986497256916556	0.8770542358706122	0.5444835880946026	0.260734712665788	0.3345439729772434	0.3579508073227581	0.7142112724794633	0.3541658346476342	0.15198763627635242	0.23747881573922733	0.18204507241802073
C0_136159	0.275434787099476	0.1064543515564565	0.18338799431584563	0.1766710112701738	0.17939632378809653	0.1562955180492222	0.4214157992927194	0.1489489720611485	0.21507818704729897	0.17826332216881127	0.1378512283466057	0.3122505007229855	0.0796390723258269	0.1989238817778433	0.20621736328614446	0.08990309462909578	0.21238925375537215	0.21934012400609781	0.45102165901515656	0.2243974992409255	0.0902819937653747	0.42832467658103246	0.1732057876921824	0.17294698835666159	0.2249408702135722	0.3336887986164929	0.22890620083220023	0.3923475947892327	0.3153263843903117	0.11730074766162149	0.28885397708510663	0.3709678403347761	0.30284774729674246	0.1642369231480278	0.25023501896621136	0.1029699771003803	0.1349746139604969	0.2593942444304412	0.2807648795860876	0.4729530747646576	0.30064733207618144	0.10281926830262682	0.1273263913268661	0.15931551730856994	0.30134863278199214	0.1411623446077746	0.11780597347406936	0.1421088451300303	0.08035416691709661
C0_138539	0.1920278265267578	0.05318994761423095	0.19607010823882903	0.2559105977680645	0.23083830284738774	0.20568050520096165	0.3675722844264227	0.1912205917667211	0.1573906511180325	0.09930484921873338	0.12308858898077076	0.35312099370317696	0.056267969844730543	0.23313494779942612	0.19634828127993503	0.07365366189690407	0.2375452177159677	0.18047790849867898	0.47864641198029556	0.16545183892046922	0.04076756473946774	0.28578690659304007	0.13802403694660215	0.0994506512922582	0.24861198022575604	0.4177479449971069	0.1502709115033499	0.3094848102817059	0.20476474877985112	0.1717726620588652	0.13239364840369922	0.24133066626370903	0.24572839487748066	0.2142033971218323	0.29161024149356535	0.04282814115935175	0.17226890630275374	0.30474875733590756	0.3377869228879438	0.4174901548051149	0.2532060257989852	0.14078726099646663	0.1661470002685121	0.17591790332035295	0.38330439369720753	0.12967366080919124	0.09405112032055891	0.10312868273263372	0.05814335311447103
C0_144715	0.04459469492561086	0.018949086153841218	0.017685048304817742	0.018665701257889522	0.021148790718281758	0.024452574513838803	0.004232129981632144	0.005557247453198954	0.002279207572044416	0.03245413829208801	0.01541326440111107	0.002124526523433562	0.032174929548198804	0.013248983092238223	0.017455831847688945	0.03846474848189331	0.0029776286185773785	0.031612530299279226	0.016953484273617554	0.011829873269286426	0.04211353711992197	0.009131856563775654	0.02294527380009971	0.0065720694989745395	0.0040282908196841456	0.01718881967866494	0.03707419643818235	0.007356280082849744	0.023885252446052236	0.040258183623284476	0.0717809245145845	0.029147385642546507	0.03183861284027441	0.013130578456921027	0.001714227737025818	0.05493896041089534	0.027424526593070986	0.024533027347382323	0.017782650867595805	0.009984818865904018	0.0016594053653721094	0.02162793465390315	0.01496908075647083	0.024223867594414708	0.021651149699063774	0.025120701838703456	0.06363209126505455	0.060702593478204586	0.012067686863370845
[truncated: 202 more columns]

## Sheet: 20 Gy vs. 40 Gy 80 Gy CM10
Supplemental Table S1. SELDI-TOF raw data for 20 Gy vs. 40 Gy vs. 80 Gy analyses (CM10 arrays)
	IRRADIATED GROUP 20 Gy DAY 3																																IRRADIATED GROUP 40 Gy DAY 3
Sample_Name	20_2_J3	20_10_J3	20_18_J3	20_26_J3	20_34_J3	20_50_J3	20_58_J3	20_66_J3	20_74_J3	20_82_J3	20_90_J3	20_98_J3	20_106_J3	20_114_J3	20_122_J3	20_130_J3	20_138_J3	20_146_J3	20_154_J3	20_162_J3	20_170_J3	20_178_J3	20_186_J3	20_194_J3	20_202_J3	20_210_J3	20_218_J3	20_226_J3	20_234_J3	20_242_J3	40_3_J3	40_11_J3	40_19_J3	40_27_J3	40_35_J3	40_43_J3	40_51_J3	40_59_J3	40_67_J3	40_75_J3	40_83_J3	40_91_J3	40_99_J3	40_107_J3	40_115_J3	40_123_J3	40_131_J3	40_139_J3	40_147_J3
Sample Num	1	2	3	4	5	6	7	8	9	10	11	12	13	14	15	16	17	18	19	20	21	22	23	24	25	26	27	28	29	30	31	32	33	34	35	36	37	38	39	40	41	42	43	44	45	46	47	48	49
C0_1967	9.336551672483287	5.0881005303597	5.154037779537506	2.878176704381701	5.612962458393765	5.711723405222578	2.5073057835979244	6.138253047805276	11.128146558903966	9.143586517501594	9.99686040571641	6.352643289717637	11.490614767141158	9.040105112455425	8.002575489395909	7.019458071749799	9.6302741557723	3.3014711699399104	2.2810756598912194	5.70135022871907	9.272596486965508	8.857415449868405	8.846375780435082	6.549558491125949	10.994539216007395	11.499097341055226	12.898405066756677	10.661093722994037	11.273911221302575	7.9953875083925245	11.718164877342131	5.860748855531812	8.735317646925724	6.569028483349771	6.832522419922522	1.7378743680924202	5.001555590161156	5.543999201646233	7.087606946299791	6.673250470863939	10.830939660135275	7.413017538997504	6.808937484548778	8.369426383312042	9.014195788557888	10.776725057772046	12.056493922601415	12.582100760239983	7.701317544683256
C0_2016	11.039693276222817	3.9916644885887	11.574296350577777	1.5903031348220624	7.530542844536329	3.3202695581436097	8.682418781226094	9.06418816343191	13.04120809462531	13.488153038453948	14.313165249913853	9.809555411176154	16.59300762216747	4.396857448867018	11.516890964117044	11.137342446411235	10.291906757169382	7.820103927090486	2.219392489161389	9.871782849463184	11.751805338973032	11.703060317524397	13.287480457820132	10.206292207924848	11.761069316536345	9.46991638708427	12.649776360746579	10.491810443534888	12.563327214953492	10.975727294427596	17.55153361596926	8.791731073945968	10.63760517359183	11.102937228108553	10.721148648362272	3.3460043621876787	7.396926067189668	9.795331724051596	11.740329130790425	12.559846414379562	14.675851229904511	11.913029928203901	2.3101030539289065	8.401643718713382	3.9989663941504103	10.246799438287434	13.890606253947384	3.846462182975424	6.2069069738956975
C0_3439	15.75202759023325	18.020268226800535	12.760881995964953	17.386952534605417	14.589931074830044	11.753559180439156	26.530322517968287	13.918342962493421	13.123921903450565	17.998012175001193	13.08241443399325	14.67381594611669	14.220337995406553	11.192589885836613	15.163840821204488	14.852560932061694	8.49791622810394	9.956159874626572	7.7679228182765145	14.590731981400237	15.619220887996313	21.468343641039038	16.872069689586546	14.405962480855578	14.54822621047596	12.125941987241116	11.389473653162653	12.263324169564246	16.32265391828592	14.936662406583713	19.255824930410853	16.196028710373227	6.834427644195634	13.964911650294717	17.530421653640385	18.297092752313453	19.893336663229547	16.06245084700243	12.806794906252426	14.345328036678204	14.326460903535933	11.379505701377168	12.230357930424946	14.562412903535671	17.426619016546677	15.678178407763815	9.02908446676763	16.464161213954522	9.599608148263792
C0_3910	33.41201363042544	30.519611462418936	24.13106944049999	21.406836710686427	21.80672354763212	11.883476009148728	19.358965819434616	16.0151717262526	10.949571822037557	20.33741140730725	11.802831165362564	10.2783501004562	21.555858367576498	8.463800116474639	12.967972205525049	12.485621709766715	8.458251029535099	9.105514557529688	8.820023868716516	15.64192589352787	14.484887651905753	11.558293858986843	13.139828344181804	13.757790414629314	11.142751047351041	9.36878209686307	7.009622297294408	8.935221359645345	9.964176216810088	11.446179542455514	51.516572829373125	37.00495289282097	27.396436482786	13.33000094254279	17.438334390796367	16.891487989086983	18.44063676155808	21.940747343407214	11.416324082408453	14.999826628718264	14.81916862725774	11.504149484759473	9.717666014286149	6.868721958444475	11.085696813214247	10.068753417289207	13.29791648455782	19.17930555535422	9.466192383998534
C0_4037	97.32511607387809	122.45517652830053	65.69848965686903	70.0234878640599	70.53947100786904	37.06582301197161	93.36441912999635	58.9834075689212	39.311420614396845	110.16255142514444	54.75747866745887	55.765703376959785	119.09630453260804	19.85062052274006	30.18020166366604	47.07488241071412	23.837906856294534	15.271921298381526	14.50084054040992	75.20374305397266	66.46384160660337	42.29816363868999	69.52676145352233	69.50556323227958	49.21960564673292	45.28138192721459	15.404226035942534	21.960239279184297	42.247588836360926	43.99320141381688	139.44131232351583	144.89447227015324	76.86227264883277	36.95658394347419	64.20688648032956	62.151843310451156	65.59318464185287	85.29585578627747	42.85552584424865	54.190480798203644	73.06061655851285	29.277700866613934	28.375738777349536	25.701199179683584	43.037364146958375	18.13158670005025	37.0394642562446	139.08299164263434	31.612361679154443
C0_4220	79.37907963230325	67.05047983252757	60.65633886672871	94.27522282358714	100.59760507196954	60.44988037474118	91.66826847834498	53.85253627971391	49.599413847561436	91.03692544510326	41.888078708243555	52.312815219878765	75.49951617272349	72.33676176916137	41.3843532051077	43.86517523813326	50.84106855187916	33.11515612792858	36.83316717347994	83.10450215676715	93.33577175906983	85.5319638345368	83.34977609018665	89.44522352507691	75.90324521138221	72.2801858745495	32.0490542004321	48.23851829322849	52.85770619394389	79.50624250701449	95.1889002785422	93.37028466176571	93.35732447082357	78.28716003120493	69.63628906086784	81.00506305913437	84.10535705356607	85.33320689538554	42.22968878335984	52.16222814450244	71.63041794232969	45.71344380168213	62.51345216534844	52.54886266604003	54.388797092242164	41.59479249662236	40.28245500469856	67.03684815759992	53.95248024606653
C0_4246	61.32951547093551	87.98906698465751	52.91910850102856	60.53022950869852	57.66854773182203	45.05832857237828	68.08283125479541	70.12664392329607	64.20566923262437	79.26528496833643	49.29810616336519	65.16816925788427	85.15115553023755	37.73387502126979	34.8381593554915	45.10964305419988	37.24698071986616	34.28156439094798	26.21968463900247	61.15414461895272	62.397369932750806	47.37751027133173	59.31166491811087	68.23838586664353	60.752645574603285	44.24369335921489	24.57527575905471	34.475657810401685	51.11149479425633	49.177679750854985	72.43647121055562	109.17051021518013	53.581921635876974	55.733001915750826	67.64704792688845	59.096541046541006	60.74170680031539	55.255639932479745	51.41947614893444	60.392459295361306	117.82187003135803	45.79548428468048	47.96945869524535	53.09651906728649	53.000694255872034	30.801951526171173	46.12853442861095	88.57032623229576	40.84199031386449
C0_4306	46.6540662580322	64.49316592750041	31.46229185543834	42.726451512393496	50.54887721801565	26.20350669668892	59.608201698286805	45.55812322179715	32.02932319977728	55.68312238803745	33.33837801178845	34.186429805044476	61.860120782001324	20.2881509056602	22.702532352198283	30.423271489876843	22.58985529602332	18.75287605428321	18.472181447553055	45.43703981755859	38.75627906061329	30.268307762229227	37.478426884632235	44.34893873113836	33.046276965102784	23.76792418848444	16.318106974226644	22.07937551936214	31.774208455609063	32.372360811883524	59.675934143852984	67.74512014092029	40.82205729745175	26.536445126793833	39.341688486131225	35.12815039776097	40.44864130227701	50.488419800266854	36.59663430855635	40.82240817671082	56.47449976726191	23.32688802088393	23.87375686057783	24.662003460701392	29.75520432583978	18.783413688645183	27.51025842875889	98.43182154007872	23.3741711373609
C0_4388	121.79894244236597	165.75610260305388	151.74467090274823	176.56421637735176	129.2746585525146	160.59390380769696	155.86599556252253	157.52285938027492	179.37457559506578	126.6223669009406	196.37217279064032	172.56557207036667	155.0949485818448	131.87681196809362	157.47200562795408	143.24935082896783	181.6684910945045	128.94835170406031	140.4655587983787	136.53574329172645	110.20555144905701	192.4078472836461	160.13982019334665	178.15291740789735	182.2387248501051	179.96409518649162	183.97382232956193	158.71705810295484	188.9795914013526	129.75381578047498	161.6629593523724	158.36207257000567	93.24030452080213	170.79039027643006	182.21912015851308	179.89396839364494	135.36215162105447	138.30452065836155	121.96194372589748	145.75561954397196	150.16460766220357	157.9741455125793	191.2836920367804	200.89390497493167	197.24917968121443	189.2313265105062	125.67525117020962	66.35809521785875	129.14618558684435
C0_4685	34.99250295719633	40.31422089420634	31.068878095441413	42.66300365486088	25.875632590997203	25.432013686214702	47.5074012057715	30.01523317826965	38.61616087495923	38.022577225487964	39.527872813204574	38.99287804524115	39.99509980585974	24.06526184395947	29.781865479239574	26.203310958445748	18.48089756076207	27.37377882874069	16.984717122709814	24.829957047668405	28.08887473328014	40.73544257944027	37.420866091266035	44.342690367635775	50.483974267667435	31.973370968395425	25.615622937941165	21.008431891759265	39.35313205637497	29.342555767079308	41.80340958571076	54.103777482179474	21.485999874054148	39.52047111565017	59.06250899976142	46.612181240192854	38.83133238267776	29.972615151054587	37.79448805962089	32.203253206063636	59.617924891971946	29.00969407388842	38.28589949770535	41.98993632253271	49.506907920395946	35.88330905143028	17.282417033033006	36.20248942015601	26.25516306787601
C0_5026	19.047699813499595	19.044167028011024	12.17302619573221	2.4674112680016242	13.171967919348734	3.2384918809345318	29.1214649577254	32.30372125584628	14.105888499003857	25.51539449670951	8.76460706847476	8.788227851400565	28.08313283766874	4.269426251343095	8.175703889892747	4.147046334992146	5.436177367547119	12.053772816230602	10.761858365230662	24.84918506481799	3.7311696985387344	2.5157575314142138	3.887340222115984	3.9616983559478047	9.5915545942243	9.83507407156417	8.1172953514115	7.458464909249284	13.135382109869592	14.92877558934886	17.656199812406804	24.157758646392363	19.790702344254942	3.2313121414508843	4.8556338197949795	13.375472488992378	9.588483030800088	21.620363839274912	10.398232511250626	14.052923385989935	20.086406369499727	11.589145170713364	2.2720695274789833	5.743746723288801	2.788705293618554	5.1734296567981595	12.524058453295323	84.87064856834557	7.297874321036494
C0_5750	11.149982359523573	17.5073413609747	7.172239223319036	5.192159056137405	7.209960693151345	5.727495533381754	8.836158423486724	28.263063867237932	19.671611034275205	22.42315808527295	8.637399724886153	13.529809580114994	14.79300300876021	6.058882584379762	17.158964500419913	11.56131813270116	4.302324542734485	7.45926740755556	7.030246856398064	7.7130811849477015	8.035426152382472	6.8817146726435805	9.660130562924188	8.574529606810193	8.091740047276545	5.420210043504076	4.757021433802786	5.437119821005602	16.330052290485032	12.124185469996448	19.069136149928887	22.0693849599776	10.332003547488801	4.508080944685339	9.027015472517204	10.068131184941171	8.880519988833006	11.957238721070457	11.249587638756863	19.563501051189885	24.245990848492415	10.950319871666823	4.152773248449236	17.630396640544248	5.182055936067295	10.316440928783104	9.288573686194503	50.69303065261671	4.814368136040507
C0_5920	25.882350520458342	23.310202998402396	14.83480489290072	28.431594143939968	22.065174899899386	4.92560268910152	12.344819152978024	10.818617966309853	6.847281455261952	26.779330455755314	4.417779991687428	8.530764895908021	15.16324217818141	10.015773930915737	8.092454796855801	6.327098722454087	11.578106693762322	3.953602804703595	6.24643156486308	16.97006881767514	24.50338251046456	18.461519351481815	7.96312650570305	17.155266132914427	5.404282530408485	12.256099421263894	4.482386835275789	5.865023823986345	8.248851559996574	6.296848253433146	28.919577873913703	30.577509993367293	24.081275092017425	20.71618739938093	21.464437847018644	19.25835266107006	24.906737597431352	20.97841522531816	8.352750799822065	7.638957862982793	16.811909007417125	14.626032214356895	3.737767054276635	15.388066187663544	6.837456074773035	9.269929054999395	4.590607289635171	44.90143893269706	4.537065200515912
C0_5996	22.650252434647875	48.73402470825111	13.585085909452829	12.730388510789911	18.278699792283625	13.188263758185963	29.845090169973368	113.53209471875431	72.73232802266982	65.60604123386956	33.92101323980246	73.4904383068489	29.422697434096253	5.256919799060614	40.520092974492485	49.82530084243025	11.42477318631726	30.361724035979897	24.540332008487084	21.77221716129359	10.295725456453514	11.298133738218704	29.681110855463125	18.003552208165086	26.948861468714444	25.20775241695751	18.447455871310282	32.97467189893549	57.107942067023224	42.165575484150615	28.74833005553207	34.3651942544294	19.557151594194295	7.5795229938442965	28.13713413761567	15.677752593418086	27.08710080117089	45.26731649015793	38.19274506009548	99.28580585260245	95.12572293009694	42.1248797693109	14.584650830054226	72.41723866275647	17.927409365551995	41.7177629927846	37.56380537744348	212.81124958455285	16.16124667886085
C0_6331	92.55230614839661	75.49685076499048	43.108486152405746	31.63340910408621	40.04789676222526	13.51140257738398	26.089226598070535	56.546862221710775	25.44748728244024	63.622065401504855	23.402620841602435	18.44226741897287	31.53162257087484	12.863307863186106	22.917419999042956	28.36680900712637	19.52196457399577	10.880266119448763	11.145744170385106	22.25780617211133	48.18379909872034	26.176745754658338	25.819285653485014	23.512117474897426	17.83354067095833	17.886312448436424	9.0116927611592	9.849912262332525	12.19957522143521	17.872632130283623	89.46440444951733	116.64698815219748	62.23858995658207	15.644001687874912	22.93993985499456	25.660043389977393	32.77119497870481	32.55277776520283	24.331038432670894	28.71365323951678	35.331221704606676	17.933667788213146	12.072006885287601	7.064681761321928	22.80917344628977	7.553389672571439	33.3526596981303	70.2777113504317	15.708469605899632
C0_6883	326.72110745868304	681.9130822947411	335.36978460061647	602.7494755417812	358.624456499888	257.3301942665238	852.2033067813458	371.21687987691047	462.42987294553325	434.15369875726526	381.15004769673476	414.678442568778	290.6724608747688	244.0520351143777	321.7081670377642	329.5200219144001	148.76598018393602	180.65487813352465	146.34000644043346	167.24796307245205	353.9767656546935	493.9124309441248	433.48718589701343	395.1739940041635	375.417380085195	320.81655930798314	188.62059945599987	240.79681199451582	392.64932991823616	476.73120641651496	386.9523333493159	380.22247332065604	163.6389640259404	360.542568908861	555.348606368599	414.31834355722094	563.2231754678701	403.9134862454459	265.5274120084488	447.9776394870679	489.36537436131505	367.300821921021	359.3172935129367	415.7431297765605	449.56123935236315	316.817675234003	105.62309158852908	429.29258167086005	227.3453714284916
C0_6924	198.31240512544903	353.04928769760755	187.5124679577112	257.1866044991345	143.09071043577902	243.22707605708314	584.6369948446466	143.44063204410165	175.85309782727322	151.85413424764474	178.0093826315221	168.902969204354	160.07026990456677	220.18862532336917	271.9355805481504	268.63223263107005	83.31602206151524	169.98543011606796	187.50272304792557	150.97667844511588	246.7585245340792	399.6334722797691	256.90023303839905	169.46974994772677	161.12743141568862	207.19725613428446	209.9978490136864	284.7385918683087	347.9061712511995	258.5559305477573	210.60361037398977	193.4193451970287	91.3262935171965	194.56204397776065	200.14085096500543	374.1618180995638	436.2870599064317	294.4773162541487	137.63375575997006	169.0477643751934	177.092648022593	192.94300224409085	235.7235235493274	267.13676979963583	324.03172996784554	351.28504876367344	85.47226903814983	165.41326447228826	163.03514396720493
C0_7053	128.75151109697026	222.86158832212328	105.3907453338765	205.8912008731401	128.38907933269704	88.43759373318714	261.7309667309179	133.80338947231812	174.01586664702364	143.84565052318348	142.59159607477807	175.95113313652035	105.73475310606769	87.905146833374	125.3648055351829	126.05427327318088	57.60062510609299	56.082094999185124	59.72851957469286	64.79484438475235	115.13373402688026	175.27658927240617	124.18793842764924	135.25439934171627	106.38954092232298	103.4209490212945	77.463450249066	94.44396158366806	128.18002601613065	156.7791688256322	139.39238052252696	150.76165797942852	68.37244648156391	114.91300379250023	163.1050664627815	129.13883424434388	212.73487836615283	119.28932504481917	82.4700263452901	112.68167168095273	193.15172757248203	114.20334862188064	106.91538350480835	170.70768729796268	128.289922867745	109.1510283130558	45.96868593022457	171.8175783754604	88.01698487302922
C0_7093	88.80960211418893	145.05028245024172	70.72508972336027	107.70464184319864	77.51377886035354	65.63297768808322	191.9045636909348	74.00873092752944	89.42669443191335	83.41994522057249	77.66753717417393	82.4144985003432	72.17347655208822	60.369269128872716	94.18099923210994	87.25425568384618	27.688671529165198	38.19675516065493	45.62490343362735	52.770119568482144	81.0646211918657	121.16199322844956	85.7260395262265	73.53079720951324	60.29841780996496	61.43282383070937	54.0047083923536	70.21983375169503	102.00638389954364	103.45105274560191	95.16798937073516	92.957266154269	48.71282467278715	63.52693043048568	96.24866349692806	98.06668573968402	153.4281464667725	94.72666646285401	52.960101254260664	76.49880266871523	97.4837960110505	67.36724584634587	63.17147848984462	94.41904270207505	92.93674173801115	80.91971149471733	32.768376281279814	100.54109285049982	59.53911943634047
C0_7487	41.002135779774584	43.76635842305655	47.454254783994585	24.388839384062155	46.187218146866066	46.20676290856675	25.32720350535851	110.26729024487835	100.21500268450224	38.55114866672672	59.993998833484824	128.70475851631565	45.23707952170769	33.98634732355827	107.94239161333161	98.99079180589484	64.46438415967324	138.42715085394548	153.85615405677078	67.59013283310091	40.892992810881104	30.570658474979783	85.33292507962742	34.63552473760312	99.15664335744685	121.14438639354893	82.55493529365502	137.97004727574935	94.2157719193663	125.95222318665138	32.78840291625973	21.331553618304554	62.16756138175042	36.38664982642496	87.05808618640519	32.945671602961035	36.302207127703625	52.40501942637113	71.82264104551254	105.95454389789694	73.25684298118308	142.20884748497826	77.63174799441329	25.537260868597134	39.13582633728665	71.30581782810141	118.12224089238042	44.63205427811204	92.7030929243531
C0_7553	47.29683815830706	24.57261350877445	42.09227513619392	28.962419647007344	29.439037281978386	45.97108845207757	33.2530740607655	45.660486851265745	39.655706718228345	44.856136806800215	40.67181311686033	58.091009236395095	43.407315429220425	50.05881897995649	40.39862516146577	55.55799748557724	54.84555715995569	64.95216362176929	56.889157379433364	61.44543360813086	62.67259897304174	44.98514491405859	53.78148613802637	46.58136230471515	54.06915175920451	65.46119578234031	40.46208496909806	64.90652167446557	34.13618956084661	64.94838254829281	31.528398728257848	24.80988940556869	49.37046403942394	30.29646485206458	34.34824025037708	27.583064700479724	37.44153486288685	40.44954965369678	50.542242109948006	47.21446323736677	42.69969291963573	64.07953042493754	42.93633102607593	71.71279531198093	42.048616144571184	58.60295511040677	66.21760787988181	34.34809450882872	62.09472786125435
C0_7929	97.84939159780309	65.40523130649078	143.0016485779937	143.72927423290685	152.3263179730099	105.01462059875257	80.32757358130222	45.93424522860418	44.085590320665325	134.87919639873598	64.740165869912	79.57866979229684	99.27511632320773	113.208700723934	41.86699074381643	47.90086912301563	86.32544614292115	69.76347433600088	80.29688105512281	83.93858483382319	115.90770067610538	92.76035034953357	71.68977578717644	132.68365168663829	89.40746579631691	92.01374364285876	56.893764370378946	59.59726345516441	53.99991983506133	65.37606319379297	113.9416105290654	83.419035814013	118.03431193588803	160.95965635278574	92.0438962832146	110.20946213225841	98.26730471757327	88.27565032698475	72.05371123412901	59.02579696969121	64.47542835800381	78.8371965041029	81.762131012462	39.23193387120094	66.05744775723468	46.869396235759126	63.450248151667864	68.84593274044204	81.04035766989448
C0_8174	59.48417685736734	125.87817629463018	50.442806088277145	148.90005266802024	50.57569992122962	21.403810539407093	115.42760245046688	94.11404816999229	74.16804526091347	113.66308289506884	71.11283351301566	86.31128021491536	62.69782856449072	29.400407488656	52.033363060261365	48.045683974610895	30.757263793543554	22.519586260622184	31.903535024746567	42.149270559974156	48.24671415756601	61.443416590386576	49.408730947444994	67.97179847727024	72.16909002900016	50.59412929743873	25.43535029857065	46.38684447799134	51.905277931660635	65.21588523476426	82.09243186895668	104.13767013843989	61.59201687283557	54.49215480749588	91.40138316164852	67.27291694106319	73.04788143496653	71.25600766824907	64.15308933094174	69.64301853444604	95.46223998026	61.47335525849087	66.85792705490194	99.98295459227005	86.14566956793686	66.90818545825081	41.26204832443674	169.4413840370602	43.89167602935729
C0_8365	43.71503043102441	72.12642791780434	37.192877858848405	49.661825948450605	41.808261800693344	34.37791074150413	69.28196192493226	71.94522065050023	69.76938510888617	67.96048106094743	66.95518919875055	44.83094309507002	52.14139467174784	37.847748771594965	54.883873916570984	45.444005375767176	38.693397052150836	34.21618794776261	30.709126913685886	40.254489519013696	39.41583688549466	41.75318513972389	40.41730106099751	43.290586289376414	49.81037288021133	39.37399050093897	50.99902009722114	46.08079907802899	56.5646909652201	43.79086364822705	56.273108999579556	58.183385965966785	48.46886131306533	40.037108783837944	55.02762117743444	43.116792542415574	48.2273538012583	56.73282014297064	46.81988817805503	63.47423430465293	78.66891975273596	44.68745272346302	53.86062804693325	85.93638209901904	56.48278279688894	50.28740768464844	43.38170754118301	107.32001743854222	41.10822301269043
C0_8618	52.191806474163826	92.50568025620699	58.636802987371745	87.5383703166663	67.43514671111	80.11450696724046	85.51142779207952	91.54164908637107	90.0786992196015	69.75655843447224	109.69398145323412	69.4412278020397	65.93719458472782	66.81122758932094	82.46091590675046	76.4616525627279	77.89758560282576	63.0070317163081	58.58110748498015	51.92171734524067	59.536210709242056	92.01897529630621	86.42575773592245	93.52172246734389	86.76723205407195	74.89597799602019	98.7744438974678	72.72004972508547	104.43912885091912	74.88494253909187	74.63399259375325	86.98116702954545	43.54726253464856	78.49076707844446	99.47135423700865	93.35475194923666	56.81135635149405	63.394619136521776	50.62290997562647	83.72988185381146	57.745563181613356	71.49267316078937	113.49801451793239	100.11991261749213	96.30599644885906	80.41466107457374	53.55956860993741	155.72540872165303	69.11922515256329
C0_8680	120.39222086952725	174.89679174705452	101.89284074602816	164.072473228877	117.2201970285579	166.9758466420088	194.31125820932877	164.96704411833693	161.13236804409593	135.92705110229414	195.7655577236829	113.57884274503805	147.03699203900877	122.32789285607254	150.81948199668966	140.967882516926	168.14611166898337	109.49203752402816	121.91007573857257	122.87978503239192	110.61928540238137	159.72096816358282	168.40776158915398	168.17755936476706	146.40636473652287	136.54126657192157	202.17025765635975	133.20057663853626	210.6279417096945	144.73432925384344	128.86108618761813	164.2206964436219	87.93018171616029	136.02017635984805	163.73186314609617	180.52904614113032	124.3584402143102	146.51016394530816	118.9347280763783	145.1778287306102	109.53005845552663	130.62133148816028	183.00194733954578	154.93374581147964	178.62101911373517	136.1338996525806	105.72675039164298	109.91556159035358	106.45566699109033
C0_8790	1665.5559146947246	2357.856321202402	2302.3070485886074	2537.098093678548	2032.6484066434289	2321.0520506930966	2278.286712205935	2256.084651079412	2565.8064038975945	1826.5512186596054	2535.695544104217	2751.3290686823975	2201.607238441557	2047.6269307640268	2128.6674795402346	2025.0825120655813	2895.7223186782244	2162.374480398309	2419.42084423492	1839.483457598689	1573.6550453136815	1863.9492733190202	1965.7393122410515	2348.6085691661733	2259.2151485405548	2773.423473697315	2294.8249552798766	2287.683036534598	2396.181864761537	1872.7412807232756	1933.0295275582148	2168.493309957635	1780.8230230710817	2442.2891373255634	2384.286139771712	2272.0132856363493	1909.58087565807	2095.0076022964236	2224.987498926065	2254.622819245435	2210.0963924435787	2478.7593340220924	2351.6548642206267	2535.464749550301	2420.755435439247	2511.6621413846706	2040.4656906558437	1092.2908798035144	1949.1093564211276
C0_9002	251.0737970566471	335.79223813675253	296.9269603159584	333.9792728565687	297.7759127768273	337.5788475465249	313.45639456068267	359.53071804148345	385.37552113387017	257.35968872491384	404.5539106123742	316.0697488650424	317.160718328463	304.5940063457648	313.5744524827724	327.8134437739123	380.2130219484537	311.17223638934513	320.98053063376693	275.487693613123	222.82955686079418	341.77894477411616	297.0747823647825	367.46643585841264	349.54352730224423	363.65368028038006	396.0208124952569	320.73015318906056	348.443118583645	257.620249986374	301.9384057881063	326.32625513970146	225.3180480933033	341.1896524251072	330.92034220887604	340.34437629639683	276.2315566748071	303.24754958620025	307.6408495272289	336.07296979269626	291.04471789770434	325.0149493682759	372.3077815364686	403.9518501886408	416.27631666821844	373.31255845601004	299.64750437621774	168.2412303956727	315.58205114620046
C0_9380	276.41620803760486	316.9674631659709	377.6664341234887	460.6619247718639	343.6063919893372	307.37528030461056	426.09877237966975	284.1440653096043	440.42560900034675	320.39607779456185	475.02437616341604	398.8909022311357	254.55162567312655	329.51037073716606	321.63712838011645	306.2003515269278	259.8520865264675	381.433508775857	238.9157622701509	201.36371934108857	278.75233798084025	465.3516601541293	343.3403915686239	537.5171103022507	534.3303119949925	380.6646041468855	374.032603794792	249.4842432364354	305.98485777281496	285.27680860234506	357.00171254654873	323.62953123200543	244.3046391544073	420.1456966535952	492.30922795975033	465.63377978131047	392.45938333863126	325.82839679947125	446.13032058428684	356.91349835173355	275.7128681172918	355.266633051737	406.71528297494154	467.60439880332035	531.2898287009953	413.51451834872995	179.5534582366874	138.44971045603268	330.833451916249
C0_9544	54.87128343475589	47.4063948987874	35.13749717487795	37.875823971337994	40.27615665596452	31.138483785476634	49.657355275660294	49.18212021866601	49.93727924022047	42.11307371666663	38.47559886430729	30.7223351791523	32.134316390622516	29.31477711101268	33.150213903724705	32.53632171563936	30.382045200726353	27.62252546100312	19.265469688793246	25.00440007668569	131.97568618897992	37.1638645846941	38.99908030898003	37.25005482220647	33.38610719959952	27.269494105080764	31.91046637407803	21.48800873377136	24.070390240811356	27.77949061155589	49.825498741521365	61.283502078652766	52.353217998086734	31.334554611279675	33.074589928514555	39.31508813501884	42.48386561324659	39.09012069224417	70.49895004308848	35.19048876784819	135.01356775684846	25.0994463251861	27.158740530943394	154.72924547466016	40.92819390556944	97.00075162624185	33.672389454045586	37.74717162950463	48.01385846939217
C0_9588	55.31679129464357	50.8788148724823	49.32389694323232	52.855325977507626	50.53143243661385	41.65175868420332	59.25614379486473	52.92749888814024	64.1158944522212	46.789101333071265	63.91265060584249	43.8691117403755	41.95652003786524	42.557557278004666	48.77089662330303	46.56719340544411	35.05226699055419	46.811361067163055	30.567972475227208	31.480382359548003	41.13826184641466	65.53244067645869	48.16649903903255	65.55789979957568	66.72109475797939	45.0653520562357	52.8592056010827	30.53020274131071	38.91506133084094	35.19274697875579	59.717721478905865	60.925302939780686	42.59732481703811	48.82109859381858	59.460309689525786	62.544899112853535	58.00822167556709	49.86257346417394	73.62299772681875	50.09036353681929	69.54792941560368	40.27179021199157	48.43629572515535	99.93753181940347	71.40279135987103	78.37136765618253	37.99537213627524	27.99415464964621	55.490324776047586
C0_10833	2.136087803826109	3.521245123327697	1.981908329749777	5.899517257546686	4.954650459881936	2.411997352196335	4.963152179574173	2.695812655400533	1.8367362301172654	3.5107151306255973	2.0748132365948755	4.114168986059289	1.750817787793185	2.016482975839237	1.8070523774640206	1.669330835250695	1.3645059030985351	2.114801979569689	1.5176725956001846	1.1687381477106593	3.0785651927251814	3.5359970938709804	2.8311360252569964	4.401703722565357	3.731622839593649	3.5303691232918	1.5746201396241826	1.5170323215891344	2.0598528167614014	2.193406712653107	3.9874335104171075	3.701002998364333	3.2477076794173576	6.192768097859484	6.028965642220021	3.3850766606684948	4.288928208730467	2.1706068428857814	2.665202363607005	2.4982754781238805	2.9175436980123495	2.7403037404349524	3.9528640020513905	1.765158234299067	3.0183191456883716	1.74756907356004	1.6948791584835532	2.613358522155303	2.520871693356615
C0_10979	5.233329716735978	3.286381153870219	3.9996526353554906	3.5599652517775233	5.464298031703521	4.185822680926401	3.086476803558757	2.8354171093209772	2.368544861590668	4.819672954076072	2.477473466917658	3.422930376062922	3.8108987348659995	3.828875116372496	3.0922853960319645	3.002412039189204	3.226816024471792	3.1477273534235497	2.987758660555901	3.4814813787650207	5.731453970363765	3.4472188000525357	4.057132133883214	3.559363799285029	2.9081220255962883	3.5538312823035607	2.0185155157988675	2.418757291113438	2.9395639804517923	4.1880962790272624	4.362894350857894	3.722764589899098	4.640681606892864	3.9084684078314162	3.327733948472367	3.344488967268321	4.157599352441595	4.651147313493544	2.906082372000612	3.2056921337176103	3.3923863093115254	3.5340021705572187	2.6651341837274947	1.5839808192021383	2.555209513796429	2.00402962366733	3.417822211045623	5.024842329232666	3.4501002069478552
C0_11772	176.75072658986085	221.13547224879807	141.57921002719968	341.4614761674511	223.8006375481958	98.72994284356969	205.4771081280132	124.77428053482737	111.21773237799376	169.54639204786744	109.84122366012171	110.78958531205119	104.36471922736698	78.93718614728114	90.82051963460908	68.17683292252757	66.77266096680805	67.6423495346285	65.57901935571665	49.73331575779655	125.68397481133667	168.918664461037	104.3777124691173	150.69685120784862	125.62473721911128	99.96180927217131	54.36721342870784	64.65956229375156	73.87660776730516	94.04932815370843	198.0947656972206	199.4069819950645	106.64479504326131	240.89435965523882	247.38520462223988	192.07473744745766	230.00417017445363	142.29424021440354	102.51452865493415	104.6079563534375	134.13594230375872	119.86108127586519	128.50365515408905	139.76774899966983	153.56066546897844	87.79785056363832	39.78633784728075	182.39901548608918	84.31558444001409
C0_11825	52.672095908243236	87.22897589619878	41.840712443856056	65.35175186161592	51.941336991712575	38.65245437771876	103.15016456989754	33.551205566632554	32.94534678115284	39.758882147356694	28.687033738566594	34.435324386544494	34.83402402513065	35.7469756045466	58.796139579035696	41.953127144079296	21.608369685962266	40.657901031626814	52.035160999313455	32.6328640498292	85.78500076753602	83.14650745371411	44.94205294165205	36.619729201893364	39.004709631388614	42.63812334573489	42.03100329814664	48.70183427310649	53.10021376056516	44.19304187826163	52.30929220813743	60.78274429408386	41.65333180507572	63.36562194659421	49.39551955445614	99.68675145406355	124.09385215989496	80.74341322756689	49.57855323828573	31.245768745140385	84.17330634431191	31.711494919588482	36.75029545807931	93.11303689794968	47.67539562157296	60.78439349202395	25.820883939094507	52.139034850196765	46.60507972288777
C0_12006	35.62785637758992	38.52041647865588	26.58230948063197	54.641948931449946	41.79878572260546	24.718875973297482	35.52453973021514	26.72124905615045	23.700507634985904	31.952847265048963	26.4931310781876	26.932289327507867	22.376566545561484	21.567550773145665	27.470104476057536	23.27176177486374	18.429137987109087	23.110864517304254	23.507335101214814	15.535137648819706	31.629439836672237	40.427492053316506	28.954949503456906	30.397094732196177	28.53722207021107	23.38940200695972	22.28354184426112	25.31535778022564	24.84157179253761	27.482654011064202	38.194854632808344	37.469596497209395	24.797560869707162	44.613703223860455	44.638312415286684	38.019086026874646	50.65886859668811	33.352066634213436	28.488258080239113	25.413490277204673	29.583448350064035	27.134418738041806	29.877432054059494	37.25201085867827	35.88416526928597	29.195568894530233	16.170808233483562	37.34705360723092	26.89311123053101
C0_12229	8.031190847189004	8.049434653229026	5.5154210623204145	9.01216040710286	6.727256098548179	5.226463497417998	7.328484970197417	9.920734411794044	9.269240565614814	6.3721202100562575	7.494914084714352	6.576678144971813	6.083457529260733	4.692334292466127	6.221982268239686	4.138667971484312	5.947815588306099	4.511120601344573	3.9244344869318715	4.169817477985953	5.840298622002881	6.963658927154322	5.252656523404999	5.6241941710519505	7.190812981850909	4.904094236396783	4.435773616297654	4.31471027092943	4.184847191918748	4.755838570189181	7.375200019066512	7.194117238642276	4.888336452795088	7.538656358154264	9.907170228205995	6.373385461334838	8.85592100852336	6.070455184025857	6.836124145462005	5.965639039663363	12.969156290845934	5.446026765693121	5.9155608967092865	10.091107768755762	9.99674464718473	7.246942772113269	3.9005893590976006	7.142897965388209	5.133069504725386
C0_12351	10.339104807117264	10.736485840845852	11.558385502109365	15.64762450102607	13.34051800371847	11.207053447913072	10.123060875301574	8.481155358590508	9.262759783218437	10.784295549439275	10.944873236628778	9.880888823258157	9.584817448292947	10.631603613919104	7.106370382773447	6.849802810762075	10.286929656484729	8.448951775321797	8.592512033860611	6.737149233204254	9.869359404414766	11.60390907200234	8.685378415922228	12.88226835679027	10.74605489486165	9.486224836446794	7.508498873023367	7.347598838418231	7.79234895099685	8.233457999952684	10.862317703254638	11.209855617742956	8.288573006908146	15.146481730154107	13.295585703456931	12.220215712704434	12.430869860957085	9.846479722646349	9.101287522134196	9.399767727169127	11.102968299962733	8.951529703100153	10.19349995716613	10.153369546387486	10.708907801651634	7.831359243648663	6.81923797546914	9.03797687442452	9.305231119085768
C0_13315	6.482409418865736	5.2023863886443875	5.908109459540183	7.484341043908497	6.664385777063043	7.617587100321416	4.213168981723222	7.6074834451624875	8.032645914957484	5.6877983856088585	6.6560184904623725	5.770049936483789	5.531555541653128	5.934663861021887	6.51161121073816	7.461791438130366	7.751474588860069	8.074672332296542	6.0838719092174305	5.402566889726862	8.474149869324464	9.342735390664147	7.895761444977209	7.695568998689124	8.169850219317725	6.155612565974946	7.281617991286273	6.159391249063398	6.651007990215313	5.25066658086285	6.945136873084257	4.856280612876048	5.014958552800348	8.143225618239793	7.523805939874074	6.315039988650061	4.219176905798235	4.078971313110777	5.870172859531825	5.471378977207833	13.335728245884043	5.739809732183784	10.374872037285598	11.639126700224272	7.405426616225529	9.049458548832881	4.768500475636419	1.3400283752705626	6.170615953881074
C0_14050	10.226751360777575	9.70009529567475	9.956277488317024	11.129522163345818	7.668407084325434	12.175639219785534	11.832603401313014	18.88355770333818	19.688790413842355	10.61058882781781	19.162652129276037	19.31384714344294	9.198107501230957	10.1806213539461	16.762781581313533	13.416636526757816	12.854917367234584	19.005936046964266	10.140299594819808	10.720997331400987	5.766231141921825	8.162899008794334	10.23790137042232	7.774295171762134	11.701715742271462	11.126016565102264	12.712427179774627	11.49819517370199	15.168968612575604	9.367936306377011	10.077604699735751	8.477697467845115	6.788050881908728	11.524820480295649	13.63831592303054	11.602853682105254	10.29400797156579	10.607518323309598	9.60974176792056	16.6041296888675	38.800963125986435	13.726866273848714	14.90680875273227	17.793280147577995	18.176459746059617	18.36982479601228	10.680549408587241	3.1046855017141377	10.677886766530658
C0_14155	5.9446137547728135	4.593162507178926	5.023118006992861	5.421313056019039	4.28752379729711	5.968169479562335	5.816792782003781	8.843736561587505	8.053124649468602	4.771052758984423	8.093260162564626	8.733191945151873	5.0098332622090185	6.185489590505219	13.277023849997162	7.902829976010779	6.451914083502631	9.793545041362794	6.374721295992628	6.2316010480910835	3.4451412110782282	4.413458657193709	5.618414604763469	3.7953159223003445	5.8099212030419425	5.703919660129433	6.7198272779981405	7.313651346360052	9.996115699065975	6.541370022690123	5.112002020519011	4.091567892078313	4.125426641207465	5.847183239572859	6.090057928870946	5.621525920051044	5.390482577457417	5.221527366307743	5.040632627711345	7.3419923929171444	14.947986441132858	6.92606945435995	6.6661417236702265	7.20294131342545	8.8541989533656	8.943660340476216	6.890839021813139	2.8107169976069395	5.898147980452024
C0_14899	152.32978647884198	208.2426112402892	160.8887626595758	88.68000642269116	131.91533146286298	178.07162360239403	101.6956478186299	624.7619832526526	548.2373777214392	190.46913602831393	324.81925441923556	606.5951345821853	194.4371453955382	134.74589558806318	521.2966428739717	482.3149511753867	305.5342146450175	698.1081584558286	644.3284682124943	281.18195384615797	150.6043805775079	134.05840703858885	420.0739491606571	149.0035252702805	514.4824255916659	509.87845202982226	368.7730926349155	599.522994388527	401.3452265329052	609.4727170656198	119.4209007664145	93.5536845123887	158.5355018732266	151.61052975603315	441.92763317698126	113.26437616394426	146.11185427413355	223.70174121501677	434.21822659917024	561.5557755875428	376.01759250149445	676.5642653107086	386.7079981738779	182.7458011534739	191.05710190862715	329.96383315803746	542.3525638602028	266.04775434750354	424.885703473054
C0_14926	178.3512158397283	191.29031983982063	204.224319661563	106.42538630622462	193.8523850836558	222.97787351260646	114.25686087632356	401.2546024912096	322.9861452760018	191.6328141332514	261.2051309125771	451.0619624326308	233.1906389590579	169.03075121778502	479.72762375701694	440.552899674926	303.41296910169314	593.5949997753532	649.0397439974533	309.81071226737714	183.19502875058987	148.7570645249106	379.9619762429864	163.1646650745947	416.092034269937	434.36317661830105	376.60439188989886	591.9517775020691	400.8160811781173	507.8977627048112	143.22068013638741	108.22626496782009	199.28221386639424	179.79455941505867	326.73527310759124	140.36434302863788	176.74953538310535	259.41081793706053	348.652212135039	423.05158318975043	272.22538797042637	479.2753669326915	322.2801037519056	136.13670684782016	183.124612770158	307.79006219166286	529.4681938733268	225.72342168203787	395.91106800364446
C0_14963	230.85350716675833	135.33323900052974	234.58773542085464	145.12772333043293	250.7234794209681	241.43629972022012	126.97173445984932	210.22357215576528	164.7528864139804	165.23287093833744	161.92258314743967	241.88436650977854	200.82067352663657	230.54919063477965	295.1461783220566	310.8531528549651	213.42459501630034	390.0368302450479	445.95949075219437	248.04545865475632	242.35934224590113	162.72338217082748	254.83116254056299	166.72491643868034	253.71888985721452	275.102823639997	272.88965366355274	396.8406038404871	273.5537384527425	319.99412234698224	175.75807342736388	127.87415124752287	339.14710483308284	150.08448284980298	186.63801546080313	165.44597822213984	168.17409718381074	212.6034184907699	214.05255279617614	241.2801015600405	156.3439824434471	261.6164707128816	199.01014161315072	83.0636106056796	136.39000761996635	196.4837917150317	388.78050602063786	162.0551623526975	262.98007084524284
C0_15050	245.24210711624852	139.69231551840383	226.4207849373518	157.67025476984637	196.76604664344237	235.6645652397605	164.47681542970807	202.39857698541215	163.80883208693183	234.07057202480883	207.66528071381487	224.19489377985923	232.82072257528128	270.38312746327233	225.895447916157	263.11899470847084	274.3849185014986	297.8784390563247	251.80937871470712	282.2890831170113	282.61616797163293	228.67375148432336	271.6358706683731	239.35487736100052	267.2558667366763	281.0281590113164	188.22093267532563	270.99339559646893	182.9294704978797	300.0644910321264	182.04262841376817	141.2689132411896	300.7473354755036	170.86658832111374	182.69044853234467	163.00548186473623	186.07676225655302	210.0303830244465	287.97587689608616	235.70745556647384	213.1123261105508	272.897934837838	208.67916273918806	371.1064407308461	204.27516540587345	257.754348864663	313.59517968788026	212.58670977327913	266.5344322531035
C0_15094	216.31634154767409	134.8583284766722	202.7408665917455	116.98977280412662	167.21528394089876	224.59873090215027	141.96111022862738	229.22055806823388	182.72641733453813	192.3029869979143	192.91726012530674	237.91183746521466	219.2401038002031	235.7752455129958	242.01672231516454	277.6265650037806	249.8000975833667	324.36710940410296	285.6276140815364	288.38131296691313	258.5970504128333	200.01208557859977	264.0977451833913	195.88749786535365	243.47112832675847	274.5990861425744	206.49302426598223	297.04321735864835	198.83833803799612	291.8632368328652	160.80090857976634	126.04483519567832	266.8065061204533	138.03448154487117	176.11383320792558	141.53567402991183	173.674471603015	203.37366337043625	268.4554007096623	238.78108362975016	191.8465754917494	275.4642385547347	198.2142527913884	253.82987745411629	183.6903266007552	254.3124381343349	334.1328261849644	194.16548162144602	267.71729425722407
C0_15530	65.73534780554866	55.17680171894361	64.5816559631622	39.28325582349066	61.664093437245235	66.28757446715882	34.65134440506196	52.47362387117019	40.96361854312098	60.670560942133235	46.637940740685785	51.959303797166754	62.276839207216845	70.29934847860851	54.00922201778386	60.94822247430813	62.581234148665054	76.30377018500354	70.53105782743971	79.94281192624628	76.72903469238156	49.023582738257595	61.81994354537266	107.01844707617235	55.77269500340645	59.27655791158776	48.33227771010367	61.31724990185743	44.782619090466454	64.2976200824685	52.609563791465526	38.774252890339646	80.95141866910616	50.72978946625123	44.3651303459779	46.84504925672696	46.18558697415699	54.782898389341895	63.21795979245205	56.25691245177919	46.173748322965814	61.366531089474066	48.336960249490986	29.388262298673002	39.32234138540999	41.91886184712678	79.0809342257057	53.99868900433314	64.08505199166827
C0_15802	477.3234519580406	376.45115360059094	651.6365968890206	704.2451950632407	800.1292777506501	532.8292656682179	415.01275472523383	275.49436491568946	240.79112214360973	650.9636095892993	375.9251858297737	396.51622018009556	499.4290400252718	513.5648604561328	216.53323641411956	261.2853715715176	454.63029806857134	392.0019687872933	347.5652610217612	434.2865184771485	506.66419318914586	431.0125580609181	369.8208125799739	611.1369050845628	430.8424226290659	475.6451628753621	253.83462716400103	264.991112588047	229.18327062648603	319.8475732889104	560.2136302585842	426.5108976716534	571.0228029982285	746.8512278487128	447.30326462385153	545.9492025783774	483.44394275172505	456.7538988097722	426.0438547339456	348.7761013849352	345.4045677819955	422.4667040721743	373.7007648971645	194.35004927714718	348.90291236480294	201.3905448759342	301.06496160632423	449.9795149372761	371.2626113589299
C0_15832	434.43485758357525	301.32889345000916	566.0208571345892	479.3042220192089	578.5641348135817	471.3154600314518	359.1718220635844	226.5862728207483	196.54369850593784	477.72550580600534	286.5952553835025	321.8747814414591	452.36402786358286	473.8326950146538	222.45551995536727	263.0546224973147	386.76816066434424	370.8611474533456	368.473737204727	414.9300575572952	443.8767953904412	369.4567792933341	332.43843822672693	469.38282765290063	351.4549879661901	385.35412903294906	276.0945054668813	290.13803783955154	245.0067824376196	300.2310296142322	441.0866217708295	370.86446502297866	538.0771564214094	575.1906266124229	336.4685830962905	469.39465639031556	451.29093046749966	441.3073575709322	363.23758996370566	299.1607679262237	269.8447665600536	329.80237607601885	313.4832189344925	180.2774351573245	302.4425870559093	207.38023965863957	316.9848430149683	373.4859315262411	351.0944230691515
C0_16006	209.7642209214132	138.27232595733554	254.34280586276475	219.30230510539795	274.2846933875656	225.37748796881047	144.72072478594077	120.02499691106573	100.59143441100393	235.01586458899243	157.64330568440062	153.20478606885277	214.56048391784807	220.58537225277226	122.03945723255035	159.10469103423017	194.53762964559985	202.9274872710398	188.81304112103797	228.73009401445324	222.5004386782996	175.49984652673282	180.04600315093535	227.06649645755195	170.09011787904947	195.25393898488574	160.54146669645928	151.9693281580194	130.7570267258609	160.79361021526944	207.78349151475427	163.8382995402393	250.36800975963985	242.3735388042545	150.9272240567697	193.6001366341374	190.78865908192105	194.66491915181345	198.67483498190145	152.70917003615176	134.73216894241992	174.133355409475	157.0499171937708	81.92400661496113	147.26099284638963	108.67196554869417	197.5289882353479	195.63038299803156	180.45200958148718
C0_16454	65.81813908578923	38.39770011694482	70.65370636949461	52.50143149283987	71.44483815163387	63.83551250445333	35.47621273794967	35.6882633274721	29.065248435723177	65.42479650209273	47.97306979125114	39.6719534632342	61.37839458218908	68.08878064684043	35.93547213399801	45.43643205535553	58.702583011102334	55.36624952660533	50.89880255092641	72.70359796152445	69.77495900967767	50.3002808973116	51.00942444437926	62.30727326727164	47.68611427157535	50.69324539496513	42.81365504161517	35.875309087867855	33.42438770581816	41.8052127418649	59.74097279836158	44.390333638203025	72.60782329307744	62.5491592442379	39.03329839463464	50.751228983575096	49.984827285833425	52.09906812809806	58.394134358141756	43.83865146228518	37.659564503431355	46.08163197106222	41.89090206973405	21.24189135646452	40.308852256281476	29.90542094935321	62.52427068074001	50.891172964320134	53.31701580340956
C0_17539	27.06927751785973	67.02544131798074	34.28871704777519	52.029034857380246	36.644318129824946	48.5210040742359	40.877787094546775	67.8022804211554	81.75835545991919	28.8468121969861	106.2397333362863	40.6319485031849	32.93017640304452	39.81007931155692	61.16422538647808	51.496173466302956	65.27397115071004	39.85297463035567	47.47032370181576	31.43106029020248	20.42551633687186	70.10525636427484	52.17852493021623	63.29634987980397	68.89718055654536	46.5698157843246	82.10290554191504	50.96474518190459	73.1229868684261	31.84528662265893	40.526167325920646	50.54537786733116	17.48776399597607	48.79105183319295	60.84345121871252	52.0942143166449	37.75816606005162	34.88853641893197	38.293078049988466	53.77744228961852	37.21571955017539	48.613149963268555	89.60885572798628	99.64400808909565	79.78600847530757	66.13966254322915	38.659723071964784	11.575731547259675	46.24002930111361
C0_17746	6.8761255703758	15.571857814014724	7.961840113435154	10.806202943227218	8.274400159881527	10.786364527679932	8.495938222141731	14.79477790428393	17.306068464345607	6.52372537920534	23.57225535195826	8.257245212888405	8.992971510249193	9.530132072152727	13.717828230100185	11.870607683384815	14.43667017698881	8.886737118929156	10.632395075797307	8.82860189015127	4.771385276408976	15.087538080860648	11.09721076060883	12.50184369773868	13.806707334975208	9.33758495840902	19.351984089982388	10.62545731423416	14.55436232023803	7.0887919472967145	8.765676648644032	11.826310424698686	4.845743058824295	9.731469356804439	11.955216529812722	11.119464799585373	8.533528041240091	7.663894640685523	8.820607203732761	11.551348171465495	6.755547189110059	9.527426759180498	18.49459430051834	21.74844458837057	17.155551609445897	15.14209373898305	9.918494648487641	4.538258315361306	11.076762512975806
C0_18125	4.555009475163441	10.795835330239102	7.1239157165050795	11.888281141029852	7.053667175937561	7.388068345576233	8.940604444993575	8.014997493645346	15.105025228277661	5.559960539073315	23.027011090186587	8.462160029318856	5.375254373024753	8.14168577304204	9.926065862317248	7.870407195887428	7.546595317880587	7.903455073795805	6.8755860063795335	4.624960234494971	3.9873251703255623	16.65394303983694	10.365797500726918	14.838651283344621	19.276311385734097	8.0708983599889	13.794526481117103	6.727961256751108	10.371864531720375	5.942071865041514	7.398518439428023	8.961864920358332	3.398128175543189	9.312726718752524	13.751098908537429	12.221103731737914	9.48727077201513	6.40271567524889	9.81119728752083	9.14194677837534	5.027180376088357	8.494380103928776	16.07093504665969	20.684660790735915	19.073030755112523	14.172107505901598	4.462318091072612	1.9074428057888384	8.990138979101067
C0_18836	0.439982635269961	0.9256686265760786	0.5688969465023545	1.931803842973977	0.3996295666499345	0.17675199068453817	1.9490319250286827	0.6095275050029424	1.720670088034228	0.5641320365848876	1.8890164618155505	0.4123618589848285	-0.0027295838896024527	0.5351282138176702	0.6019283360464988	0.6535285339369948	0.1370161514449245	1.0674383518623887	0.530445034923811	0.308794880046797	0.10526242828408612	1.4019238063012758	0.5582743033708834	0.5818384183438907	1.0106127576421624	0.8190608702060788	0.7274267480865135	0.4690963908078996	0.7913760882807594	0.8284375210269233	0.3948997507093766	1.510497904049066	0.15963272036577653	0.5726250660041622	1.4449459711676356	0.9262803899552163	1.7973184941542693	0.5656441581618342	0.8292934490237498	1.302895033614018	1.1193934780049313	0.8184999271457344	0.9930905489561437	2.4284551134442802	2.269246835941958	2.488465233628152	0.40940935678872387	0.24863817343193892	0.756789487701728
C0_19358	0.42463225813735733	0.313295704303106	0.5633142047040128	0.0822584637880763	0.42449569592722125	0.4922844168257455	0.1995729499076303	0.809938784907081	0.48138213258011747	0.4559071858379664	0.4596854545460481	0.912012857133455	0.45863735123876104	0.5512983875310281	0.7395913321578851	0.6820086042536736	0.6914310186026899	0.8447819181293497	1.186865926017462	0.5149681977021776	0.4348384316494802	0.39316911628174195	0.5289531059416581	0.4358988659556132	0.8196907357324039	0.7796582516581833	0.6484590607193823	1.1034300363253005	0.5892125470410021	1.004840258635813	0.39113097194657326	0.18718369396179763	0.5280048074731951	0.04046068775638533	0.7836181271270044	0.1318196569499645	0.47844223052365914	0.2940080815890816	0.1827650745190324	0.9369108148053593	0.5685872798086238	0.9374319889821575	0.4644346075730508	0.4954623542660066	0.09565173151519511	0.46914188163598336	0.7135278539860637	0.7570893451290416	0.6438756723889519
C0_20519	12.360810328532773	32.931310402211736	8.529833829345687	30.946934269216605	12.8929834546293	8.608000940738313	25.803792094075007	13.538605306318633	16.008161971588997	11.7254313197805	11.883810482810148	8.332462357141	7.82036037358142	6.98669586318424	9.201352161285454	7.576909296136381	6.2329835395510145	4.813203769581501	7.009367650812524	3.9041152627948654	10.116333849818963	21.818969926706348	11.668962827070468	17.668664669804976	10.714048458962779	7.764901295220815	9.106063820422145	10.892065105335606	11.614647065764588	7.384041317578867	17.487202923827812	29.233034331007588	6.409869570063768	29.38199053094242	19.7953572186814	24.457148252567528	21.860386137919814	14.285331086108693	8.021012836729835	9.271521535980373	13.68525594237119	12.193693955589087	17.187486345370477	24.304800303986934	17.399531116035234	16.02733488971248	2.6658009995528817	16.559379333301333	9.712025392391013
C0_21743	11.022029195996696	20.685313923652902	7.104181570732741	11.634239445271605	7.8551645068043054	8.602182660107164	17.07220307659716	18.419217090892253	19.020891663423598	11.47155012768647	12.250103752098664	13.952381012207363	7.709606586576416	8.046177178392822	14.635243820352537	16.466592888331224	5.824723437705729	13.388918813243794	12.317590526294238	7.654240946614716	8.174213780116927	13.568694755270236	16.17414174471513	8.193813399585682	13.103879275495604	12.541818919256787	16.727968563644584	22.823456353066856	21.51873717139259	20.538494105895193	12.350965056602444	13.598318282328647	5.502808931657995	10.1173774859373	16.012109200872647	11.54297524959465	15.32007715245677	12.040662854249039	12.068372225411077	17.035795283374576	14.639402326487383	18.909393374060713	17.14467888867292	11.963622316842638	14.277121721223683	18.52276628031275	5.7283813099569	25.237326003062428	12.106420181846499
C0_21939	13.855054413614138	21.651752835668137	9.7734430313592	14.786808238869911	9.438293877175362	11.383465516936878	23.578754915277706	17.920480785130998	16.71717077952869	13.43859509245715	14.370919278775505	14.274828014801106	9.36011491446421	11.07349675536483	14.520700167341694	17.56002947247685	6.81683474820044	11.535745129660095	10.807629778834707	9.302102937279422	11.794872453381798	17.905689560829558	16.667409721725317	10.29687805172832	13.683885619436413	12.569793875651973	16.251618578368795	20.927407149873744	19.387489106747022	19.780749300563294	14.947868195557504	15.918252166615828	8.436541697425154	12.687405011041037	14.945784475264428	14.967587641559103	18.488093210382164	14.615414470198726	13.357837710658234	16.86675214972414	16.395814730103567	17.54205215594724	17.27117050940959	20.264480143145928	17.60368623449404	21.797385664253635	6.774762462787387	27.721120300350034	13.445825050237058
C0_22663	17.87732256970897	30.448564351635866	14.33536149173581	30.54451716915829	16.667651084845687	15.997792482404497	38.48302980716956	15.511168868432147	13.361756282349942	19.046974918773483	14.748880780248653	13.197313133325808	14.534367572633135	17.01624460371914	13.563844484912906	16.17910889125678	9.024268604274372	12.03519578573527	10.005852782781037	11.133076092697696	16.422521535236882	27.549327751792138	17.77514086236762	17.68714678568175	14.781957615019106	14.607555419871264	15.230759877845916	17.982856748628894	18.923099143595326	16.40188652600016	20.06872349970101	21.611907519664207	9.57868671361541	26.568463989175463	22.21640538067787	25.642257244034376	31.17704064712572	19.994500184949697	14.553487619228893	15.871252676390045	13.50566779673819	17.581252690113253	21.45358283100928	13.81576694888326	21.907946576318132	16.655347041988133	6.1980221150695485	26.205454407879234	15.2904811781352
C0_23617	52.313064846262705	110.95888942657004	46.15816113038528	53.211043403346025	55.16339272578301	53.85536874937876	62.914233788799855	141.92902753924446	171.4506688858409	45.89872509525261	103.9356805018219	99.10055335835605	54.909408883127895	41.36968474641882	136.09179050798627	106.0864939734338	67.68563042466995	88.33230056637179	112.57912513767997	51.35632528596767	42.970219818766985	64.57231219093318	104.3635909670147	56.67269533409343	97.82959615397485	86.65663345304102	104.23511458735477	121.94018873291041	129.5160459419222	109.49332967268877	51.94317483988835	65.96883704790073	34.621642602157834	56.043123518894895	96.36751753045867	58.34864749164923	59.137937767066965	70.84469514801835	70.83531732970935	106.34747700699486	80.01138897159058	111.0852801266062	114.86258233217912	79.85589231270244	71.12425595822823	98.71154677454247	80.71466940287792	57.58740712076301	77.93834902567197
C0_23741	61.50625917556567	94.1833025071547	51.01081196646333	63.38949393677459	51.31963650852968	56.62643687727562	73.05781105830053	87.06410594704995	95.71030446715035	51.67859457917008	89.61029928738304	65.38577089328498	56.963056226064644	55.30958052170465	88.75237236117957	78.4942083436557	67.59460962469376	57.84633645376802	68.08738982461858	51.94373352007168	58.00624414700814	83.59253892272396	86.7648087050121	71.44221641433623	73.92349274686737	68.30059013009937	74.56740786808174	81.27238151698755	82.42159084954635	76.60046103839953	59.5255485158635	76.23993564305384	47.184523872534264	58.785191913600826	68.16243428981811	64.0179896758217	60.38368243206976	64.91660314790612	63.55532812077641	74.22977523396135	64.97286625943745	78.40834171346683	87.56819175256067	140.57392842654198	77.29424277250045	93.97335761433914	62.144951173434414	55.12542919155838	64.88691760464563
C0_24192	31.864938811316996	48.489448598061365	28.41071334289393	37.33909628867797	31.06260577195657	32.36646310459226	36.72144592425419	39.735000260174665	44.57904470947927	30.86176642445888	42.7619538649822	34.482910799038734	32.18459924418848	30.50385746986549	42.4698674570457	36.540799792649125	32.84385555357932	30.337266146673507	30.390196171100868	28.06562226660462	30.69284672896541	41.229612668424956	40.945514211533315	37.21007512702115	41.04066387977448	33.30597406201764	38.08773783864297	37.42553429521999	40.08233704568947	34.84057481941539	36.91394998556834	42.85946596038121	24.460584524706427	36.3964321553801	39.54854722442462	39.705275610703055	36.225516796819704	33.90287623904483	35.172446956911294	37.072307086186825	29.52547053420897	39.206869204269	42.43116979867919	44.5136219391247	40.05791651435377	43.074848819087094	26.426935680268397	31.721097152199075	34.404706882575006
C0_24519	86.26916342368848	150.14569089067237	95.12071543314359	148.68852003637002	115.84199677945661	96.14647281613573	131.88697605677385	80.91308598176072	92.52793363317251	94.29515546602656	108.48619480370621	76.37140412134981	91.03083419301834	88.51716425579242	73.85923464334863	75.31174004481802	88.66885374137634	59.013960557153304	65.56186451934408	61.378102778925154	87.31005453108013	140.41355900276434	100.44936842415105	138.34192128536688	92.51317567761895	85.09837037467574	79.16389331652549	76.61972379344384	87.11960703374429	71.39299046758934	110.60310631931242	150.37426795742397	64.66967152284619	144.08292356251857	110.3525476775988	141.92458288789854	120.46800009481572	118.78973356815224	78.87779949726867	80.55142956280929	83.01915043675442	83.8453130184164	124.33440957267494	108.94926649008455	112.2198840579442	86.8881394360486	57.67605907814857	74.97838306771182	83.7420135717931
C0_25090	57.2262243268016	40.15325594450254	26.68119075717234	42.08099695259922	33.4624358564826	30.22718196969621	34.62561670550191	26.450976377192866	24.267687431081157	31.06766304009098	33.399765053972594	24.82352906765555	25.70656471706849	29.997267493813464	27.448033749303846	27.241452679592843	25.551900639990183	20.087213739291766	17.39052483015104	23.97999393893359	29.429951955253443	40.04726460921158	29.728295634583283	40.740360201731754	32.212568999099425	26.5130382570729	28.50246316761251	24.162466316000035	27.211649005036524	20.49074242535218	37.033376298317414	41.10973133158744	21.443104403557115	40.47519061817949	33.11981009469882	44.327372549561005	37.00868529063787	31.473716331789433	30.230865977234796	26.826671794821713	22.265514109382185	27.451091858803736	32.42542045107609	33.25234521302206	38.93071807614699	31.760179191299834	19.34107367068916	22.243589916988714	28.424684896818952
C0_26239	3.3070185293383467	17.935071659598467	3.2565870458417447	15.782851893478561	9.212419738815106	12.303799200374945	6.669807201791568	16.15187340275774	17.5655863960549	8.154028773195995	18.90137019688542	9.971450235763115	10.766888721707192	10.27896187023978	17.737873463864215	13.857696563028801	14.80146938479365	7.449842097205871	3.6584133131388445	8.522033351481117	2.4804424643003657	14.887700020559423	9.208654752400234	9.134602705511293	15.582339568350354	10.10719648211725	18.60132606779223	12.879759081636102	21.95859186408611	3.247770787284034	11.821349703668014	12.340219654395012	1.5356345079901255	13.706678672215373	14.563293044277266	17.248547720265606	11.944234011545873	4.849547908059755	9.039167117538515	11.112948552316917	5.587924840077246	9.935117384093521	18.462079099946955	40.30013490312909	20.903453697933763	21.326922945115953	3.102898282533811	0.472986708853883	10.195459283774388
C0_26697	4.0738834067663365	5.3363976991364765	3.2741735668758327	12.966941424628846	8.049882120578042	9.171742780692473	6.970968981431798	13.283030503696335	9.148105221325707	8.818085722584454	6.901279654703756	11.65810577953264	8.449350366237672	8.930604899542152	13.521953101555312	10.33753460702875	8.932625033564575	8.004171832946756	6.348015787771675	7.343870895955796	4.3991995832270145	8.06673772270963	4.920555152099374	5.331991963800293	13.784922439029371	9.101917793291177	12.794916504325437	11.791533700290818	13.077557227658325	6.1454776599936265	9.518483599315148	4.227368120136258	4.160263797752882	11.874235504711061	12.858309194115687	13.941961451277228	12.57043259730262	4.718343585817708	9.580500357714163	9.91987047116491	7.519771355522406	11.243619245019705	7.064015025147576	28.356775702717517	16.026366797954744	19.113208169216225	1.7065325914509155	6.738612181037348	10.227144239409446
C0_27970	80.52134470803391	103.30787443456424	64.32164905487299	91.04747518429244	64.2253705726342	88.44454032958139	134.41964086444344	127.45018156250117	184.56255081781688	81.0640645463986	128.13128616952565	128.55039456791707	91.12084885763912	64.2103420822126	115.7034391916488	91.03976456579726	80.18910597654603	80.04483766099283	46.960681219627446	64.8273137918592	39.536747345704484	77.89333078431471	74.00569194672813	64.87532798101225	100.05866125527241	78.49627999942201	100.96489647033472	76.85167562310805	104.19982149467863	56.88225615280188	74.23805426774568	101.56619682794584	39.447445247304984	66.35792128832338	131.71485900992693	100.2319147058784	106.67198740560369	93.90077799326485	69.14245838455071	106.66875773051291	233.17707764351113	71.36856671668612	143.66568121344233	228.14544919673244	158.9154469278285	175.6640806956091	74.45537497223764	19.618666276661248	70.32680614653928
C0_28160	38.58226016148974	43.1383705680738	30.544618397518793	41.25079179929127	31.344013773650172	43.588747064423416	58.07359683747872	57.69520458068062	76.44469152930249	40.425283450649	55.43319189569062	58.67412463176672	47.526657136861026	33.75024902730663	56.23498390939937	45.0022573788291	40.05246202744035	39.573572676090805	23.232355379724655	35.42390162414052	21.085918161055588	35.975331357276346	35.231401130731335	30.570752439972765	48.547520007990485	39.90860922150434	51.22981364805751	39.26138281298574	50.62824810894489	28.353755193354147	38.22437233262663	45.46663906735747	21.434462513652065	31.67615637276509	59.16190139852785	47.449436531880316	48.29138461492343	41.406245816319355	34.40994358349001	48.61922683880265	103.02511643713733	34.89801000331166	59.67768692291044	99.69885799049699	75.38324471398874	82.92229041561752	37.649160845716615	11.347178292139636	34.35738130919772
C0_28835	29.39889097064753	32.381410527208594	27.42349435694779	32.70225962069604	26.57958364840891	35.99790410026367	41.75401108797482	46.91602317199884	63.38997402074056	31.883043161538595	40.316143035316514	46.59388626485077	35.52699781297854	29.879314882583138	44.784228298280055	34.749193150870504	34.4250939173881	33.10179518209423	21.0905845536005	29.40456393590622	17.547898249792308	27.696788865080478	27.725006438898983	24.505030563280137	40.30133407190891	34.03903887438613	39.704007340089525	30.592568251885716	35.423426199330756	22.10612140517871	30.745092697677283	33.041860577424494	19.051013399022857	25.645284080967	47.20162085851638	37.063341078034796	41.107670164904064	32.72556037709276	28.856811785651516	38.18025850834395	70.86307309411882	29.278908094785887	45.92720313229492	78.05860576371973	59.31931727963219	61.51026515021572	31.15191387123284	11.416529921771541	29.487447266466486
C0_29687	59.48789852051006	40.11989829046303	68.36044844067892	43.52185290791759	55.156663156818794	61.7242944298363	55.64668522394213	81.2519860794825	84.53711816831476	62.482943641804574	57.159713748513525	90.95033356252411	64.24782114077709	54.219452320821404	77.11825775322635	69.80192206790703	56.13745038317342	92.77638349376346	98.70030136617986	63.875820681681404	52.26432744810376	46.43478773758395	73.05703940752174	59.40813671779539	85.66056016662831	81.10729090896385	59.50339073171835	79.78986055948931	66.93479175749927	98.83364882202012	48.41155892488698	40.187548744176794	60.597501753962106	47.41480645610867	75.8026265061625	46.86847600398866	49.872363766799445	59.59622788339199	62.452007723671585	80.83957375437699	58.432998000915795	79.06529388613737	58.89961882706908	22.952299464976427	44.33697867862164	41.38863244451389	78.66473859165487	44.16062923770485	68.23173307424216
C0_29841	57.40420429642376	35.72826879885123	60.44980119155278	37.538498299282956	47.9498071139753	55.1865588809305	46.823600805346786	60.891331240582545	59.52796405958616	52.59390017085859	51.01278219552514	72.86676373312405	57.84228208922284	51.89367486490622	66.4977083150406	64.91978547929891	55.938222739558356	78.85250473327403	81.33729317767349	64.02441624041188	59.37406954557048	46.34067137926122	70.30401198506375	52.82902613210709	69.28338533829627	72.87902047229687	52.96213634754027	69.33002525962134	56.23612212481499	88.14955732171006	44.92313324440469	35.95628217960263	66.57820836507405	39.180811660398525	57.58240744217002	40.211775828701604	44.351010759649725	53.095206609608304	64.87481901192483	66.69060088544808	55.812549712105785	68.74731532364768	50.44117620617442	46.81301828375223	43.13578755759241	52.635684086744014	77.94954022532715	46.7289563218897	64.89867738782179
C0_30599	72.27161950862461	55.73512824871018	80.80480198888603	53.78994776244389	71.99155502739085	67.75794906227995	58.39317784389599	65.02660595602474	66.3514410015297	70.19742437552607	62.00337984510478	86.34361931855508	73.4074238625315	65.83845639788134	61.43936731086829	70.65990885602999	70.68958949717398	92.49592704496402	95.01651565988807	80.72934247260494	74.63135122561788	62.573786751570125	81.39731047980582	69.69795130926889	77.30114374774774	87.82912026367701	66.18518501010735	76.13952615882154	67.18107686031261	94.30549684450199	60.98435345978546	52.036106004243855	78.71723935218522	60.95203846164718	71.77212949031522	55.225542377334726	60.16651097512528	77.97447640999818	74.10422238597327	77.32871467622734	60.09699511174112	81.84016234506629	70.65325421020135	29.505529422608088	49.077405166083516	44.917425194614786	85.60846972689238	77.17434503786785	79.5964331008729
C0_30712	82.81230011931066	53.82915122802733	89.76372590709147	63.16876741856685	78.12996603711684	74.15320725089653	67.41683457984136	56.359090706920924	54.18329975787903	79.17614874191695	63.347237173742634	75.56469404355958	80.4717795735797	79.00989382698509	57.69003984413407	69.93589704674288	76.4922376035674	83.64369991151867	84.60797606057892	87.58916388093373	92.94749156873127	73.84687945507898	81.94755602022505	82.84761208874528	71.11432692874398	85.17191093046826	62.71218951411051	70.57172384299368	60.283409233459196	87.98853033317565	70.17991307600107	59.634338772908464	97.64677030763049	65.66261742758498	62.62213947263552	60.35582159885425	65.94285073751851	79.58781979774398	78.49740673760057	70.39506451749115	58.97715870315659	76.19716347277271	65.78331114033364	42.15206296665693	53.447235169411805	48.39638113101046	88.27721083688914	82.20273146266155	79.12689486279729
C0_31525	66.74353461583858	50.30704392752272	85.61815446980017	80.71352092952584	91.93348821631682	65.94333291735789	65.46714674503238	33.86610436681063	33.029235193924826	78.06790546097254	45.26749179926597	49.949078946484555	69.2278011848554	70.55834823610432	33.40680148995781	43.75915649888207	57.56624084311694	54.00357282155652	54.431437332590946	64.549069817999	80.455632836336	70.94344605669257	54.179724053257516	84.29846220325672	50.248084082702555	58.232160517449984	43.75082759626368	43.77594483206537	40.26048814859248	53.6735647361553	71.02997457953069	63.09997000998389	76.2596858046594	88.25250399762359	52.85027424616066	71.04197912293006	70.66029986849523	75.90866061459013	56.698610910527044	46.38972363188649	40.505288095517145	50.39458645801624	53.7656391270871	22.94004414482467	43.5601432275797	28.83500101197116	55.51391659834449	67.56125947004948	58.40165413620467
C0_32058	36.319049487651	30.65712538193508	36.53202467227649	29.09406658588901	72.14229925050647	31.608708400353553	24.547644403503213	29.578117209395774	32.92094433997301	35.76837491655537	32.867835473193665	24.809115950602685	34.91476553106746	34.48489472041312	29.591394250296243	29.28306828052481	32.6803377480469	26.00342744129119	30.285297839511493	37.61080343496054	42.91180626833318	31.142140037907424	29.752744163976306	35.14612625644311	27.690886958248893	28.00034402168973	30.691180458691488	28.10621083743742	32.398857793545545	27.387236926727788	34.07240553105604	28.330318388358027	40.04640618509227	31.516174331044258	26.69654502164103	27.209151919200128	27.273535965054947	31.15049249109038	28.38520643179066	28.3543123792056	20.8998461216065	29.751422748796546	32.183613440673106	23.513360821534924	23.623483041571365	22.85520598758113	31.75071079330961	31.62459430106902	28.604534799202025
C0_33210	12.94756131538401	22.171749722550583	13.095175870660098	21.536377720393656	16.940009135883507	14.65507283598979	15.483211133959886	12.768619837014173	14.407864368553811	13.406313920360363	19.83766741038061	10.480530412412254	13.809237388973758	15.28684024319476	12.5667680661242	12.316684000251737	16.754412071463936	8.953768554977161	10.701453706214364	11.192633115378118	13.309125094445143	21.319332967728435	14.116689448646085	20.773623493090653	14.730324533874033	12.345818927914554	15.66582413033619	11.508188605402113	15.9713538726378	10.019651255476493	16.597765646574164	21.398048410014578	10.464759919003207	21.229734469765578	15.504225233315061	20.510243982764468	15.838905085188944	15.299240659491725	12.003532521801505	12.461928215508983	9.96522612772662	12.940069600251915	19.182592218776154	14.950205356645682	17.91315123892276	14.3783483333786	10.821319401403459	8.074417687944903	13.170005281790905
C0_33980	7.38897302169006	9.308947691674925	8.7367451093533	15.157541270049656	7.523617299826498	9.402658841351554	24.948773011285695	6.209737420698704	14.711852135536073	6.843887979680916	14.552190386342742	9.759653155421566	8.116050072884063	17.53304249351475	10.635212853986259	8.465237113468275	8.843399115127367	6.610350501260631	7.16546330005524	7.028738401782858	14.044853836753589	22.409305726030304	12.197453672902139	14.700492596992163	14.20799534362919	8.43031454977913	21.515269747422142	8.289129185439101	14.940963698068204	9.361117488554394	9.735119120988445	10.82699284357847	4.626449569962361	11.263443891429532	11.840220934680515	13.744228340319511	21.195505383488438	9.13011280192538	9.46185857358127	7.15903210916724	11.02877836121622	9.5136309304682	17.713848913152194	16.287833572148735	23.603751054774126	18.597515948663588	4.138764039234606	1.1905033910227663	8.452588328449073
C0_35189	0.2766758460563469	0.7428275935825855	0.005851235515851442	0.8195334931604533	0.053732857025625184	-0.020626359445980947	0.808592162820578	0.6644965053774804	2.7959671566446245	0.13507519670016674	3.0344538972732003	0.3596471593062341	0.07966615454024807	1.1692238392719714	1.1492166663470431	1.1048245953183666	1.764408761969136	0.24677715817003573	0.8640944508650819	0.14466054010485913	0.41976006242578356	1.505164422580981	0.5641562147395015	0.36229360729164467	0.9856568329708444	0.2674339859325951	3.2516636878524094	0.4503865631688077	3.0479271730232393	0.7771478148098914	0.036041632921281895	-0.03994814482222332	0.1083948016432802	0.1616071710398245	1.1126846207499337	0.8996358253583969	1.0789267705499703	0.1316988352510696	0.3611044951097431	0.4097496937832454	0.43819265030384763	0.502417819643954	3.0796946726751018	4.5058444395073876	1.7206678384235958	2.1447125215260887	0.010318710846025135	1.0632328960507087	0.18640636619224468
C0_36524	5.528766641875837	10.69913612151006	4.630885799321641	6.200024035511416	4.411868358743132	5.676720532611991	9.896674461744444	10.422058129423624	13.788117015350627	5.013390793866553	13.061450681285223	8.47465911395119	4.530776247681084	3.9804673559694597	8.768835123569843	7.17439190397424	5.07673223531486	5.01936991697435	4.915516180703511	3.079613174498103	3.0604285447062165	5.811568027761397	6.302397077327904	4.652289002298743	6.037592677987184	5.266234254857781	6.864570470486529	7.068643042273445	8.77672252610534	5.770631959365389	5.524040383096041	9.83592118512775	2.863248213826086	5.228016441477742	10.435568124532717	7.065400156170719	6.854929374786131	6.519683223894298	5.095034675379022	9.24324372442467	17.591029897901908	6.716065929432255	9.94432112372789	17.32678574795572	10.222359649571127	12.252005946517574	5.040181016149562	6.483907701915402	5.305228117452903
C0_38521	11.343095252144291	11.619335051247864	11.195213867900057	8.481457364381253	9.621133693792139	10.384147543765954	10.323033243043495	17.525215882702362	17.883330096295705	9.286633275356182	14.791393280846	13.86267610707465	9.234637044507892	10.091297398560851	16.328713400784263	15.210170300029523	11.5325302845059	15.308937822210492	20.52314118204664	10.010928209476281	11.203043714606514	10.540654516532687	15.232063005417636	10.90647378064557	13.022858644434013	12.950609267094713	13.023793224198181	17.140819793804777	15.681111161563505	17.973291610428355	9.40195997290929	10.223239737410614	10.88685051027666	9.07017023109705	11.844667629824446	7.961459132982385	9.111281752652921	11.437374070827554	12.74277369793458	15.166548066057093	12.355347336377784	15.417468436347148	12.30182593251299	9.356828057793004	8.054008004876277	10.702569931304241	14.507158263822822	14.072326376589924	13.332305587966074
C0_39439	15.688765687697808	16.98751595451749	15.953124274737343	13.64776751221586	15.259068752297026	14.46903178673661	13.841630257448912	15.530490605902735	16.311482604601576	13.773108523673587	18.53666265679806	14.283185238069322	13.196176402858635	14.833283951854833	14.148669307916157	15.782713245187168	16.095054482862732	15.652687126089281	19.443531541705863	13.474630969528116	16.721990383116	16.072284290635327	17.736396930777374	18.10314187507191	14.792135648655286	15.558272743181492	14.906952538562178	16.644147537191525	15.69288253404925	17.690953765644313	14.714562689694338	16.823415329789434	15.570892516071021	15.584239115882072	14.262548500622136	12.77638585101316	12.697354333897225	16.89924979284969	15.950980973426388	15.822604433237998	13.52879581542071	17.201590563015404	15.67484806378282	9.878924454755843	11.310128978847517	11.148503720314261	16.09781798498552	17.90517982529811	16.48953799752581
C0_40197	13.15124639707126	14.120141113236924	14.903964410540366	15.706210104946381	16.670621184799646	12.72555988729229	12.660058276395883	8.387066572475009	7.446261674516542	13.463442225871114	13.066017128654337	9.141118362971238	11.578064679258686	13.558826960899534	8.275814740277994	9.572489756338848	12.573645730035924	9.208692667764574	11.338975121506996	10.419368454767707	14.656672378716918	14.571655038114171	12.15785748229773	17.703872172055487	10.043680534108736	10.437091145508822	9.304576691713802	5.801871641682462	6.576897219569564	10.032877894814229	14.34128962251443	16.386952834750993	13.079533806671567	18.34982693841908	10.252291099478352	14.246554082862911	12.923433291038707	15.37636150075225	12.578899461917276	10.18388396178272	9.46249501712243	10.805705048005548	11.877203768604419	4.9946750998368055	8.859881796001165	6.775723168836161	10.598952519423618	14.062133552995657	12.59701346104261
C0_42724	8.071354315200026	7.2434458053140425	7.531646506683456	5.992424101869933	6.26923100349922	7.816150212005566	8.743591413770526	10.216611966293677	11.94649420435492	7.842493670353943	10.212532389615586	10.535166794838874	7.922523951520066	7.048696486453721	8.212000515459922	7.3277975294542275	8.073118850259991	7.882008702920783	6.325063122285934	6.663772001784706	5.361188513563031	5.860796150683506	6.413461688001888	6.743687227379862	7.1376912234696395	7.508277182185413	9.091606373796962	8.219436141930988	8.0619983230829	6.380897977191755	6.604350187622458	7.020293114293938	6.438877856352345	5.602739401317352	8.699245144203072	6.1726771086456305	8.066367179308564	8.313886330629975	7.355130333389553	8.825934115104593	19.33088923531646	6.59190610031346	8.986219562140063	13.661321743628672	10.80573147527428	10.969140970564291	8.991711637080332	4.46764144631629	6.929380337828554
C0_43719	7.307426981659306	6.244893469498853	7.667817285527313	6.2743885842044635	6.717601392982159	7.351238478668343	8.31828955457527	7.569625243688355	8.893411428939642	7.702747827007473	8.548518233552032	9.72506644503739	6.66330645522632	6.365784383869478	7.183793059456864	6.45078335640981	6.597650361924219	7.76493893846909	6.34076658684564	6.1897772775009186	4.962677796278953	5.282310290964954	5.701295022311711	6.178288338346314	5.7595605051306995	6.2003497991781575	6.303189140377635	6.110430949843519	5.983054226609772	5.679081563407539	6.254667776262819	7.474455002716221	6.640005484781805	6.316692512337179	8.604829176350806	6.6675975963527	7.835817056366372	8.119110365976033	6.843172153789856	8.0560310384041	15.261139581736012	6.034119216659271	7.555877152682691	8.670823760429625	7.783115231539799	7.629091411907432	8.676988471249544	5.584034573267709	6.45288248698593
C0_44691	10.07148795880556	4.480673841677339	11.37341222582681	5.0038120140702755	8.035700355615228	9.446617437719787	6.412307623063869	9.995892698710017	9.897542786489659	9.005739252184407	8.878996326803573	12.996888017374513	8.964604582623906	9.178384479015474	10.964718461402816	10.769994169824626	9.68061580603866	16.238374433593638	18.12512018275883	11.420706558800967	10.336117052160679	5.917303417019967	10.87629430170763	8.269517311123058	10.194047746311478	11.926441279495506	8.299765040361317	11.896543446123426	8.492890431745925	15.53962725366564	6.741459971329583	5.699836810360124	13.638530829569557	5.615947581910089	8.24731338573497	5.074675592496173	6.515422736936831	8.823537765212096	11.128143626507574	11.772110817561463	11.288830650086824	11.242246880502526	7.1475147342012795	4.434716355364569	5.45177157602537	6.511744453858569	16.16747230858057	9.308593107927875	11.378164058427295
C0_45512	15.299109623600875	7.707704530107563	18.11153180819023	8.101074542293803	13.596115654656316	14.112624515033847	9.63930152705803	11.783285719119167	11.794909635848663	14.051618694070777	12.773503652017897	15.899053303638041	13.684707323737781	15.128329347439742	11.909826014461245	14.348470756764263	14.57756844684802	21.032011359305937	22.674584610412953	18.303276024010437	17.496939385674146	10.128524212949598	15.141629483092377	13.770441098041895	13.464117164777724	16.54605463327757	11.949317269390049	14.590084279624207	11.76110993462011	19.997736146324684	10.933597839104836	9.044710476874153	22.277386193454408	9.790749542255625	11.334884949294803	7.932694621815979	9.478720048997339	14.090068824990817	15.919680010003452	14.811174590935169	12.611169813342944	15.327085378799222	10.680547382227752	5.532085817644504	6.946777503776079	7.3133159054267605	21.66278086998792	16.56050114497459	16.319716009735348
C0_46386	15.755313825628143	7.981619703002015	19.35113573901633	9.801335363168457	16.16476613679341	14.292319422553339	9.840222655218138	8.208790326591272	7.936015616716799	15.69454461747213	11.225884026653782	12.362585488238699	14.181928063617617	16.572512872547843	8.750252487611506	11.907039071855882	14.734335552826826	16.818889651197082	18.174161324387736	18.39482236157002	19.34234545055661	11.73093791891664	13.20173991521503	15.303705342678175	11.060298552648865	14.43458683950264	10.624853870213009	11.418226656574502	9.241020587844242	16.04931639959774	12.608195394879441	9.69744815126684	23.13781625039383	12.503600129480814	9.369202799910502	8.726756454087985	10.175964007625362	14.614714954323416	15.3567013786252	12.234898130433852	9.42497909506993	12.793502512911644	10.114867201871801	3.0457899858171484	6.197599064389925	5.009101135847314	18.727458292167118	18.292827675446002	15.39477108451728
C0_47131	12.936205927700186	7.478815109228052	16.489350075471837	9.93378263855248	15.43139332343765	11.989142550892735	8.125297602145833	8.132310519249545	7.864260712907543	13.59225209906953	10.16841572129848	9.340265974944696	12.218400294561851	13.998198633949873	8.260357570292728	10.336537800972646	12.740829618007105	12.557631772000425	14.608265401482047	14.632454997057536	16.160127160750353	10.453515082981564	10.81521024275943	13.796276910041296	9.364959853552634	11.159423217531662	9.343948871498654	9.692678252557744	8.963781881664687	12.102401236858078	11.260852711497805	9.191657248416849	17.901516135839987	12.874940443525881	7.810900392475562	8.472936110967085	9.107560181660611	12.52792653852481	12.210157937744256	9.839177283248556	6.861314751711835	10.659299652819193	9.149967850639385	2.656467531262979	5.245024593509489	4.278902594820771	14.95880100681033	13.85388449837657	12.436925780925426
C0_51507	0.8280955097276512	1.2540421897029477	0.6453548520269604	1.8242804741619725	1.298522391779775	0.46325301436173244	1.956825705360191	1.45136436628357	1.6190866856463038	1.334261405222685	1.2181262960228372	1.276110766614701	0.2678812692312605	0.5770632285283359	1.1310853218348573	0.9298555290896466	0.4912904865759923	0.9961267372927155	0.9886264004831579	0.23487111573194835	0.36717429026913034	1.768700183297714	0.6363733771239842	1.1915578954966761	0.7531031000347423	0.6222217527813483	0.7711856747623651	0.8851682268699267	0.7952464205410648	0.7251989180483746	1.3439145001204682	1.6367925565916683	0.5359675504108062	1.5626235292952586	1.3231303799013914	1.3038538673622504	1.4386706569471157	1.5565678245747234	0.8061114073614044	1.1405247566708805	2.2498668014694694	0.8611814493632444	0.6512709020721972	1.5138243145266868	1.1216920209814127	1.0715995787049049	0.7566668402253314	1.4912435799266712	0.42482556292232265
C0_53423	2.6332665457337576	1.5189508984881357	2.7714351506657766	0.9673001726375483	2.221531440123899	2.2762674772564915	1.692565741534538	3.6072431304504606	2.8892865290284178	2.1226165780217117	2.498967337024086	3.3440966843930737	1.8659766502230746	2.47491174528922	3.530576707654107	3.3603155514468463	2.487008045261571	4.343948253617309	5.644122935629983	2.5245442767214663	2.5068992208343697	1.4670052207472903	2.954837006221004	1.8561777120087408	2.878168115608383	3.038501748676601	2.6599793844206743	3.8642734167245183	2.79951696915365	4.624389155012879	1.6786285090744064	1.614935079704524	3.4070942841998124	1.3250150877060418	1.9273426149026696	1.0552000157262578	1.5885746561101988	2.391185825865509	3.1832644350630246	3.584803443094704	3.0866281106033777	3.448009836468433	1.5173746804506305	0.8122764837357317	0.9161951048154316	1.1806355422262482	3.9006095153595246	6.17406965185794	3.031212148578489
C0_54347	4.102198300591788	2.684325353515877	4.639667110621769	1.9968605257433383	3.999283249099851	3.837108402684477	2.694545797739845	4.402599784497152	4.040608568984961	3.622271460954195	4.376671094924932	4.415524505344634	3.3201852912086647	4.17969581598911	4.016840567073444	4.746857033837632	4.291784831493824	5.706058237910405	7.100545036428321	4.132238056044368	4.524402277705381	2.4833301561438583	4.485053051352024	3.5583395575791275	3.993666051005932	4.441759637751457	3.9219210301779395	4.806187913038331	4.135536949800386	5.966721986625496	3.066497106032699	2.9333378625669404	5.4007425975400905	2.844206760411379	3.0769829114449796	1.8696376214993677	2.6388715695278036	4.253218153858712	4.798720434768604	4.657652928783921	4.1180161092470415	4.687859163263262	3.107199938998043	1.7080579688922175	1.4860807684097144	2.1570563347507252	5.476469450114752	5.767347792551168	4.8048064212152575
C0_55036	4.5933693535552065	3.1163701560953383	5.091599220176405	2.8411900316571237	4.8596186749561845	4.119904809477859	2.832279671158456	3.607565870570105	3.2814257894503043	4.371117901640377	4.155930816216755	3.8521929181579475	3.684351445398433	4.765778078287064	3.3300694102099486	3.9630338154036604	4.664175660331009	4.772170249693837	5.72755787133444	4.269952185200035	4.81946233009833	3.0485117413481393	4.002486438049233	4.384669581595248	3.565843281709021	3.9964977848129504	3.5501196449323302	3.7416829001766128	3.082560755507205	4.4572970116321216	3.732080641291157	3.6424617135505586	5.724104050700254	3.805425683161637	2.8480858470017165	2.509555192409923	2.8823707672073935	4.729236503087956	4.787987927979861	4.07564077179613	4.364026395293518	3.910674908519929	3.059069058656602	1.492699509450162	1.8959501330324908	1.9567961162796468	5.061315221635765	6.167280432013582	4.670392644405231
C0_55743	4.973241681646487	4.4315380093613665	5.197447181092538	4.029519078287226	5.223726891252048	4.910618227674374	4.428058705015173	5.599044726969332	7.284521889696619	4.966268372496872	6.262535088588987	5.545218330766401	4.696701196253321	4.786145489667292	5.207916273707406	5.0581297404442145	5.39393656921239	5.088180949601834	5.065958006883311	4.594101996290679	4.372314594278653	3.5332354825111483	4.074563973896444	4.440910901245662	4.468432387332013	3.8963425476366225	4.764298527244658	3.907369031532791	4.554225189895111	3.689684857546613	4.358466396323261	5.048883610823995	5.103350578303455	4.432636708001068	4.438613894051181	3.7906145192540546	4.175177128917026	5.326553968470881	5.033630470889532	4.975038680460941	10.806706759884959	3.9853829581252995	5.213525466831179	6.028400102478262	4.592823076846511	5.012429225624771	5.256550723804548	4.580560985611943	4.909895271509748
C0_59574	2.5243242223701894	0.6959573310387291	3.1593079130194344	1.011625035683248	2.3605812834590836	2.5163814955915607	1.6668133178915256	2.3140326498699135	2.1584342882892233	2.4403406881742855	1.822817317533769	3.551813361995704	2.243807841698453	2.642450705156004	2.3415095716835426	2.774178502802823	2.5727729647076445	4.938167892050486	4.975938489793251	3.3560531146128234	2.3393856980373045	0.941913945884559	2.147393567983347	1.610593714947988	2.318213548126158	2.7911915294417695	2.0273688110788997	2.810878754448528	1.6495508172075355	3.775452529729547	1.476061332219506	1.3829750210090839	4.173703655076398	1.1843582728270619	2.0821370257283918	1.110217406581701	1.5539839809350016	2.272172276046022	3.0722427868493773	2.9989741580021962	3.1893278505127607	2.483745718717912	1.629052259239522	0.8134512060048896	1.547073352357459	1.3280260104450066	4.747640755649577	2.763390756554269	2.9219927822405185
C0_60388	3.366505045624412	1.276980849192389	4.666075924246905	1.457432418263271	3.3536385974107286	3.4135428334561273	2.025519454511281	2.7868756045576664	2.4378688466512863	3.3994265381830715	2.5545204817855174	4.128223661302388	3.177478341327338	3.8387770857664143	2.9263127893764924	3.553137605885621	3.6647599762580607	6.350907891640647	6.873821015984323	4.723435894202039	3.792602137384751	1.7628927479448633	3.2706148453511803	2.6102970236600354	3.094043547482538	4.0090828104663885	2.671890332095122	3.494761016886998	2.5656858200614625	5.379684048773427	2.2177128049806067	1.6316225635296493	6.290685526912339	1.857818647150753	2.3111430238124506	1.3681427201743581	1.9506707745442027	2.9669204033691985	4.212880483036528	3.7513085720300894	3.213318095038915	3.369444654593842	1.9621288204511176	0.8888890288164489	1.1564069002477273	1.507552585075808	6.179937143152253	4.680729315456741	4.098956018232655
C0_61334	3.995545650313439	1.2190230127719115	5.588527651400981	1.8175610300874825	4.2389318565831084	3.8955247556675023	2.224667675759221	2.3036309580709915	1.9280826794591266	4.1248377757251955	2.7942925742534492	3.9218799100618917	3.736776212405913	4.905340195546428	2.713191079381466	3.5751509847425247	4.321139411743532	6.197126736678299	6.560583359614502	5.608977893678409	5.196757365298942	2.343660536242102	3.5221002882478563	3.365845702089403	3.0626413484437185	4.242489782501521	2.9079466652773847	3.3389554893795688	2.563720354141759	5.256710359288321	2.7024559426108694	1.8021097562259785	7.541686230926233	2.631230954798636	2.3606750632242313	1.6504422984481857	2.338246331373474	3.5872108543617522	4.4411075364642585	3.6251088170091	2.9379153879212705	3.475535490236826	2.0718649046019606	0.5242072212196406	1.174718286192385	1.3203422044806226	6.440758748791905	5.666690568136798	4.7141958606
C0_61893	4.10549169241085	1.4918938610362265	5.537855299733466	2.1612896985146737	4.647525244543994	3.94480638079052	2.5104117812857667	2.5369626931977933	2.384059001032986	4.111160551051328	3.0361649911337327	3.641714589128398	3.857484080580651	5.129353624994824	2.8797356225396733	3.4814830872484914	4.393007851971242	5.581514863541737	6.319527827733774	5.4281546145403015	5.172126064658095	2.8099781065886082	3.5817198230378833	3.7463913388300845	3.15503456609116	4.044802018173998	3.336970591974495	3.3298705650551694	2.8781845024542148	4.879054273835531	3.0741307179846125	2.0552017358664396	7.171009705691753	2.8253599162291816	2.1679831010551247	1.8929915100298293	2.716186650521056	3.599861470603018	4.4029967079007095	3.4927492875918644	2.552506104363925	3.5200413085298847	2.4899804786271105	0.7734843605133142	1.5232644918905367	1.612349724570619	5.995982056857919	5.505852338519828	4.494017718742582
C0_67820	0.4134840738462135	0.2347970007066547	0.584697529055415	0.4676771171964256	0.5954161916279822	0.46473275383903745	1.0488788158406788	0.4095362127523093	0.7305794210724224	0.4244548931620284	0.5296593805840718	1.0145924861021993	0.25086781749808357	1.0063528880363437	0.8722560698202173	0.8381123871976295	0.29650307728308367	0.9555664851629376	1.1073334183250214	0.37654578934065547	0.6683342748716911	0.6463582702188588	0.5457728040605756	0.4524476967871594	0.8005550238055488	0.8394804345180606	0.8766002888957777	1.027755673375707	0.8374878488576927	1.0637706432693252	0.343142716613906	0.30603186603433613	0.8399905890337831	0.3959754187967577	0.4621207112980051	0.32232684497466674	0.8969985742945261	0.4231873071402449	0.5967102175264557	0.6225399323902946	0.7104148263132207	0.9011185636540228	0.48993327061773906	0.30284416541817505	0.6926109663124204	0.5305112698109978	0.6241706981849716	0.8874531583422767	0.4547221722578016
C0_69127	0.7625031630070346	0.22839186917859133	1.0305632172640469	0.1572308647750107	0.8434287614052709	0.7799355831511704	0.5311484245848193	0.8989120750118851	0.7190445437580061	0.6672629419174517	0.581043033634268	1.1525207587968078	0.6340135502815019	1.1214205064969485	0.9341462204382679	1.2475602792872498	1.008351648018399	1.7572822431912545	2.3841218242909954	1.0708929669353524	1.0090142136459908	0.24968011504302481	0.9226720303376676	0.5039812247962682	0.9014953348132932	1.2659169742782312	0.92882686113123	1.2950673664671173	0.9505129555874231	1.806955104672906	0.4139109673321172	0.2106490917126023	1.7960424490379758	0.26719822752514677	0.4189406622765012	0.15262456583952408	0.6038584472414756	0.776082121730314	1.1527121253359094	1.233032653846094	0.8535671594092076	1.2185224614616947	0.43907457530597405	0.14631325220086722	0.20445317170886904	0.5268201937536389	1.6720139197700397	1.8700282567684785	1.195581532224958
C0_69899	1.0326027242863118	0.3726981970571164	1.3516069289272783	0.4040434347976814	1.3103116803870714	1.059393479540283	0.5605615886193852	1.0003524203071958	0.689017150372145	0.8998682629776312	0.9602398018824964	1.1597435958982725	0.8224618654207398	1.6093263066909413	0.9293305773649043	1.244199816885825	1.3535474918147516	1.8326810961018685	2.3269652485198016	1.3009329972947865	1.3464627331485566	0.5283011584544599	1.0810409693801983	0.8609401447366692	0.9571500555089102	1.1976941967275592	1.062139774980659	1.1925078155674882	0.9440932436664772	1.7558604316218347	0.6674265849442302	0.531523426656099	2.1646292340408846	0.5841518265866766	0.5996496839709574	0.24642044571118624	0.5565730669334471	1.191286917888536	1.5387332785829466	1.298183816503032	0.8628284459827837	1.2915090014761974	0.7378497284809656	0.27678669243645276	0.22434155012587761	0.4113705678866233	1.8851918502573217	2.437905279975975	1.5527053119274226
C0_70672	1.222321700927003	0.6256537831988517	1.559164690054321	0.6124018145637179	1.4574482743785024	1.1318933334865036	0.604526209146999	1.2191316221964108	0.9454681471598266	1.2193603821549492	1.0430700556298231	1.2162517310607233	1.0298278175490183	1.5353685690061651	1.0808500894475295	1.309863084907833	1.5133208477208808	1.678902678273233	2.0915743873552692	1.455817941509123	1.3056674587473436	0.615493762529237	1.080737390712148	0.9616676469191457	0.9665788443245783	1.208098003778237	1.1930697672408643	1.2446519786240546	1.1314270633681356	1.5210097820380886	0.8590745211341847	0.7223858557687872	2.1114410121858067	0.8272033477573318	0.8333537406673523	0.45526029614209335	0.700144388273056	1.18528452867267	1.4746615595753534	1.301379202657512	1.5723904806011129	1.137551494317184	0.9723867158593242	0.6379876067196756	0.5140200691263924	0.7682824021647688	1.9117618844043487	2.0989729225794402	1.5252475325807675
C0_76923	1.2949345348734307	0.3595384794415978	1.9295576466934174	0.5966837329875285	1.3792157038572472	1.3049485133151013	0.7150220974255206	0.7926740217098717	0.8626961165339126	1.3621807243798356	0.8481864814057477	1.3410419544358094	1.313763509255526	1.8049624956529213	0.9369103882066365	1.2825722172372682	1.5867009095359825	2.345404258400849	2.6886373360304234	1.9534220042684547	1.6575598215844765	0.8487093699208191	1.2350921879838972	0.9882338265444315	1.1349905362729815	1.5962193625176213	1.3204462562707384	1.391137126876007	1.1828884033242395	1.9499662339519663	0.7871402563882581	0.42862089690359345	2.689127625267544	0.8028897314296825	0.8060347620385059	0.5172916656747868	0.8120667790843034	1.1867986935006596	1.567264921783689	1.3832608554789523	0.8880446755460004	1.3062551464195358	0.9077503321820003	0.34550176053719506	0.6290408803304232	0.6720972528996045	2.4197519932184157	2.119133915319844	1.6748098170919061
C0_84042	0.26511139850389853	0.19521340142978566	0.34417200610783166	0.1226036284039613	0.24397370984810515	0.278493079765833	0.34136178949038026	0.5186064856134992	0.7178990348696173	0.264033649353027	0.389125823465789	0.6415015034797252	0.26313735233176094	0.42343585850078663	0.4122819907953993	0.5804150004676927	0.4155368960947633	0.8351633691307575	0.9989906229697497	0.40361822711538575	0.32126920431286854	0.21343727378311256	0.45923335144031746	0.16496438645514513	0.3668877183636021	0.4757694015822385	0.4972988913366866	0.5444832526527247	0.5413959762938214	0.748969768390305	0.12888131028157923	0.21247249892816103	0.5144981804214509	0.0897673480296766	0.41946589790910194	0.17142068919607986	0.3149418498694944	0.3544804572737943	0.43353794673399637	0.5729664073826469	1.1860684118678728	0.4837859929949651	0.4882320052297001	0.772290236354434	0.4149015796651103	0.498381465695327	0.6775799044719075	0.7362533627039048	0.493363677114724
C0_84687	0.3258595574666596	0.21638269795143844	0.457865568666687	0.13036447293351264	0.3707202918143953	0.35279956842626475	0.27216370113658905	0.4909056326375536	0.640587310815782	0.3401129426758234	0.4432267379229116	0.6456692682620324	0.390835151815797	0.4802973002038102	0.5088265817447063	0.5715523789742898	0.5567492452834285	0.8728412434433725	1.0739127338400312	0.4508230453443409	0.3862645264803716	0.24211035451443733	0.5300523103671752	0.2587780673133076	0.49604726107522107	0.5015834302374409	0.5433359452901843	0.572108639467868	0.4862196269648972	0.7355916533888872	0.2352232340394727	0.265222649683491	0.7313456341236645	0.1751047384516857	0.31088513345955704	0.2189182099578941	0.2668178390122691	0.5107959696229617	0.575725269741179	0.46311971024677073	0.8326826171163675	0.4457266138557661	0.3935833461266899	0.5417443588726817	0.32696127157555444	0.5030300761983086	0.8619513808094723	0.9727602347715478	0.6371965410972757
C0_85800	0.47245947204511746	0.19961665038363655	0.5275712772578904	0.23439915845170575	0.45765195686583954	0.4159488771161438	0.3198716156927912	0.29790226097664896	0.3890711339876988	0.43112323038271805	0.37000977621409437	0.4676761827677881	0.39032774537469656	0.61422969111479	0.41173721120137596	0.4426073265751642	0.6032370963838841	0.764440635903812	0.9162268767462711	0.5530516411419201	0.5256917914579295	0.3003097570111803	0.454387682783531	0.33027838936726023	0.37204061886464385	0.5394905540347086	0.46722506808845976	0.5340296907433199	0.43236651300642825	0.6187643925471218	0.3486110183929044	0.2727261016638113	0.8953610971316923	0.23884546908978824	0.2483499496659171	0.24008417614884422	0.23225798053239402	0.38961415992404863	0.6451974288462187	0.5436854418212602	0.6822334056388919	0.40568133975500775	0.3289539217863095	0.3339643863001057	0.34910179128105273	0.3198820225065107	0.8485070749343822	0.9151840011174082	0.5241322433199029
C0_88736	0.3801228585826911	0.3621595535512546	0.5475683901242333	0.9902105177339419	0.5890607983460652	0.3449713279730971	0.6432107172516645	0.10065354706810559	0.1653082129286593	0.463212901576603	0.18149126397910562	0.41446888369587465	0.34577799747894633	0.610220478801838	0.19254173691978185	0.27069306998076065	0.5263415626475166	0.48084000589759635	0.46982449979588975	0.35989733076868696	0.49575035523431976	0.7959352917209683	0.34395889059463775	0.4874531667374062	0.3095679395159257	0.4243257855193466	0.2698010818695223	0.23954661015981435	0.24588618162670595	0.32290591108693656	0.4243334670038673	0.31387026255413947	0.7062640978727281	0.5411303035988898	0.36107235788720893	0.46465562085834117	0.4539327542385759	0.4291778237902552	0.4753399883053228	0.34914722352788885	0.31488375174791344	0.3041688339768023	0.4565018735912436	0.11549228477579346	0.43528482366992677	0.18229342385592498	0.486156538723665	0.4416474738740418	0.4263844393013458
C0_91780	0.35104721101157893	0.18600594540982338	0.5764429519311336	0.14666571981275162	0.43072777044907956	0.38770627615598724	0.1905072120353197	0.15642494706436347	0.16559665384258576	0.3623365076256195	0.1218357371926934	0.34056366443177805	0.4180776848159927	0.5230859851370095	0.255549941592443	0.4207665715430592	0.43313285961362574	0.9195819750509451	0.9565259240787304	0.7340360824492996	0.49784927096541315	0.45549422105952553	0.33285081829189106	0.2712113768602445	0.3092764494376325	0.4331622304804754	0.29514614425900076	0.31780084602942205	0.2626415659430136	0.630085737077881	0.24883165798876458	0.1600200396800698	0.9702311782602945	0.2153948854649648	0.31696580752855796	0.13380443178102489	0.24581265142175027	0.35575031858343104	0.43640931794953597	0.41543886272889685	0.11329254134687744	0.40923502410665064	0.23153213741669948	0.0995495801723089	0.12371973381070399	0.10388858372704045	0.8958966908142569	0.7370136868611351	0.5274436719347257
C0_92785	0.3171740043697491	0.11926068169273148	0.5759964523870357	0.10144642147936722	0.4492428387094397	0.45056228142087373	0.20358893711500692	0.18164504669022602	0.19339376374342526	0.4163982140943458	0.25269678886053426	0.2358532720596308	0.3564087622390795	0.5796294694352402	0.20760254514505935	0.29167697697887024	0.49284553482473537	0.7174917572040665	0.8412326876031809	0.6595329736802218	0.5445720303628115	0.24494978387267058	0.27831992439572045	0.31908680805889	0.24306306147658924	0.34226209587748974	0.17543178931547612	0.3696085025265177	0.32517291652718633	0.508290820464454	0.23767467812845006	0.09869467000075785	0.8758386397675187	0.06571112773417154	0.20546981093060127	0.14111826820739443	0.14957876158832595	0.262390128808804	0.504462306837595	0.3263047214253198	0.2893363388233134	0.29748207332132875	0.12017822248261875	0.06430465536616461	0.06511611226595615	0.17033403976328984	0.774262959400273	0.7503480570427754	0.47142073963118275
C0_99599	0.07968508190176012	0.02460919354168138	0.2516512323388075	0.09611443240639571	0.08859060755425333	0.07979612918529054	0.1808572066416834	0.16858607272183349	0.09936126720835756	0.09150005982582649	0.13487450529346554	0.1213040957440907	0.037612758996025036	0.10515265328271758	0.16349362205656653	0.18986177306470117	0.1683367264218739	0.33777988083103266	0.43722516708114867	0.2119158688923786	0.06859845219357684	0.10942535811929355	0.1272410819478162	0.09825772443652507	0.12435604144609042	0.08817490864634203	0.11898338259303762	0.18066865448373015	0.1474936345946263	0.2662767573126759	0.028242338117924884	0.15916258151500084	0.182713901525607	0.016635331228564056	0.18942910094902699	0.11123040589847732	0.1275891951034928	0.08701577500594955	0.15979424796690933	0.24030680283417347	0.25663854791476237	0.17229213496122792	0.1063718740907581	0.1494360666887264	0.1602488312806573	0.17484707659193027	0.25026285080412364	0.33953615998623643	0.10860914707784693
C0_100767	0.15526606677440963	0.10363621726232886	0.20495176189724618	0.002021996593862935	0.03832704780343026	0.16280947652363922	0.15365673763534135	0.07161204952789647	0.17904813085722518	0.03867885314441957	0.06810817595722549	0.23699813553961058	0.16694289047791558	0.16840364172842398	0.15127774287954818	0.17141693510469605	0.19923959563761973	0.28111373909649595	0.368599238274926	0.2144867832627143	0.17444542608492447	0.05853734544323954	0.1560804935818165	0.10038130879502027	0.12800876118008467	0.1332556021339022	0.07415165764018701	0.19749869685503965	0.1867329780260736	0.21513343633090293	0.06562398795102793	0.13051212526883318	0.2988130297786629	0.10053993979683586	0.0826918878140681	0.06222607658333823	0.11663356736919887	0.15535915757063323	0.18993069571953802	0.19766130312681243	0.23077830986766953	0.1267336572970374	0.15209602849801	0.1249699980578586	0.013658525106625014	0.08973304328758343	0.23129448259495564	0.461101410936003	0.17534633082079773
C0_102045	0.13678933936818677	0.14040839317867254	0.24395574140723153	0.1663120326458712	0.11197628662287178	0.15829046787162443	0.1935885018859304	0.03686290336552812	0.09184967212379128	0.08005265601122373	0.06838372750782877	0.1116468351876835	0.11732433341723855	0.19993847834817652	0.11685941486796275	0.1099350304997069	0.1438773201574577	0.2174740170782707	0.30087211114536366	0.14162738329712568	0.16668079272134043	0.20643284245616875	0.1380354230270625	0.0967771946648112	0.09469218365647024	0.10313030334030153	0.12209452222373507	0.07025565534735545	0.1422542611030172	0.15354594812773942	0.08260531463096275	0.07051995381521237	0.34146706854316095	0.08858691924644443	0.09911762900774333	0.07407179605152586	0.07174034118259856	0.1255754849132767	0.12180054904588669	0.1903630334886353	0.10018012774795775	0.14643158016726554	0.1272627472699455	0.0706543224165102	0.07082026510598037	0.02718933731999275	0.2573271864629087	0.30346781153863883	0.16678354456849004
C0_104050	0.13060885143809198	0.1342510056092152	0.24837818001893713	0.27727060569256173	0.18698196228923059	0.11682823278021998	0.24720853928773334	0.006250190664801669	0.06630701011970314	0.19054632587985665	0.07478488688125802	0.14342086336090812	0.17436249291787337	0.21080216365245402	0.07681895004981522	0.07898538479589112	0.19308246001001386	0.18030113376762075	0.19297537037620505	0.13529433266076227	0.14089165154693403	0.28605114166740614	0.13481570487408653	0.1666650318348879	0.12587212061598851	0.19055169252119372	0.032036447287395936	0.06094017247904843	0.14770047877796016	0.11453768964895944	0.0637090121672044	0.1293502138832385	0.31135065009735663	0.1824381182529331	0.16080326329001068	0.1641261374691276	0.19122363326360195	0.09735722530237383	0.17929380568974052	0.16952984085328646	0.1063932619002494	0.11340851212478978	0.23745282450442273	0.01476038765157967	0.20974533242486318	0.11493815623841332	0.24422390145018005	0.13069175537856173	0.16126424686787583
C0_105090	0.12792123835652508	0.08928512247374566	0.2259859664138996	0.1910548470830895	0.1382846704092854	0.18108178718814666	0.19453652588378834	0.07638363202140135	0.13851792894491508	0.15845027350056606	0.11844483915052183	0.1845804608207332	0.20366634885641885	0.1769375438238574	0.11202099692952208	0.13757416831855104	0.15922389927594985	0.3132338349845096	0.3625875051227696	0.17435206850281282	0.1835210662336987	0.24745194660487205	0.14330445456399005	0.2139721910309947	0.17547256873502973	0.146515213292442	0.08272538981563676	0.11756091140918681	0.10906077080923768	0.16717725888420434	0.11633615633160466	0.09334379940143515	0.28140673434769403	0.18865232189864298	0.15029297757011367	0.11916192171110734	0.1243294908308167	0.1995697418584654	0.1076639792692762	0.17233068526359804	0.14211707750398786	0.15464915078566663	0.13286419433590385	0.1116818336478802	0.16266249876146696	0.1706752200279329	0.24272941603267617	0.24296862913304362	0.13455935881006462
C0_106720	0.09299643906954702	0.1393003964885075	0.2327216773320187	0.12984939306232768	0.16501379526865861	0.09210053749989552	0.13375289246686198	0.06818048899709865	0.11668965094954628	0.13683298274087158	0.02377723735363158	0.10729077060327444	0.1623297657095423	0.1797544463130065	0.06780537883055104	0.13340234528607295	0.1895966516173881	0.3765353923101396	0.3947547748048574	0.26038763159175493	0.1658800914375561	0.11841791856238075	0.1309616386071262	0.12155882609300477	0.14216802070470702	0.19405186192763793	0.10831145848684258	0.0916873424569663	0.1201474097897894	0.24525152288601593	0.06312290293639457	0.07004731779149692	0.35056172427861126	0.1578194933017713	0.13405596874838976	0.11344067159123478	0.06015516407347381	0.15077920493045244	0.20701500579383172	0.18005362936582725	0.09765032416606959	0.09319462195867416	0.11474477566645151	0.08603740370499494	0.16702070692229068	0.15881617979917073	0.3551603843560844	0.3147919143809465	0.1271941361534059
C0_108427	0.09786368966968759	0.0028663342441605645	0.19456873136853495	0.04385899510585101	0.1402683173912225	0.09010998097161975	0.11885455523265705	0.007926809085151356	0.031382714815246376	0.10858232819883179	0.08193855375015112	0.11172212770875975	0.09234835392937163	0.13005628202505096	0.08395033002655575	0.07467904783669985	0.11889627352121042	0.22696343215390313	0.3597201729593943	0.21228398084437214	0.13853037588733133	0.026004247039537406	0.09151544644686514	0.021815914012487482	0.03372092444904895	0.11291059730846624	0.0270830326394755	0.08647965241393733	0.0721440606737093	0.1645275866843136	0.054594880403967	0.06580599349765266	0.33246699981521105	0.11160017086965911	0.088101683285436	0.07068923078645133	0.07649360930168862	0.0703879648025373	0.14593911472546198	0.0932047358076812	0.06818591696673353	0.12221949386498605	0.07892542044847033	0.04246022374862015	0.0829560290492795	0.057723904533127354	0.26224382781571004	0.23550102268411488	0.11430681324266666
C0_111401	0.053345093832417936	0.11494225966379866	0.07000166622859028	0.03243271131921428	0.01647587680556691	0.07023010788021254	0.08836774255296861	0.054784207585811866	0.09123563356692382	0.05200541608660475	0.10533150878200875	0.06505839150858589	0.03512680021404565	0.0047713975454649355	0.041116417515694614	0.012470831681022714	0.04774001564315336	0.015009036041812725	0.04804540786790651	0.03735416344081067	0.0894614254042961	0.031108025710006645	0.06303103306285779	0.059065503321600384	0.06768202251179042	0.027711516405339188	0.04430817812129752	0.04148928490386847	0.044525962326876604	0.038112234833048424	0.07570661571297764	-0.004286323560263011	0.04050650698259414	0.0022742740640695346	0.01995046625435191	0.057038516979536644	0.022758420511706227	0.04375786242403215	0.09922041628903923	0.05592933882818688	0.10114530106273534	0.011858144642031221	0.05683532509721406	0.18842512525624297	0.1234444420895755	0.13196887349937106	0.054966327511384236	0.10411171185881833	-9.397202905316156E-4
C0_112348	0.04229532988191012	0.06488623474845266	0.06545370080052734	0.07966474451239405	0.00715097507249361	0.01920635565955176	0.06827766771996593	0.03721230415905409	0.11924725079139176	0.00874604941049254	0.018611766332775614	0.07860183538000738	0.0070178857257717974	0.011604974544096458	0.06498211076366382	0.04645753178589264	0.06986960241322548	-7.176485263231735E-4	-6.452925852182079E-4	0.00827228816187543	0.023100293607697723	0.05135799278624256	0.03394807797409643	0.04138096753022724	0.05205601804506771	0.03452095107740861	0.024489088585918826	0.01512650867051365	0.0715764496139816	-0.002534692843615693	0.023027538875388564	0.045050363905731125	0.002619067371172098	0.02859292383636131	0.04223907176596903	0.008030264666647928	0.09057659988883625	0.007779437835377057	0.031246874133526396	0.014093020932987954	0.20726791121014446	0.02629337562174826	0.07051732487674493	0.17847402439935775	0.07463040693085092	0.1554564603883018	0.0023033608820964588	0.07364383172656051	0.05465603665499879
C0_113467	0.05306568306709454	0.023468220540203623	0.04054616634773395	0.025456132832069073	0.05587436469438826	0.0587518787496291	0.11402263703634215	-0.002043382913145714	0.008834568150985293	0.03917331868342688	0.028630585339783084	0.04397729082701838	0.0061974589837866575	0.0014662621378894905	0.010345317693551046	0.0595665452811684	0.022003898801410224	0.0204711356947912	0.08228913148018929	0.0017591647339854587	0.04763692654400059	0.11189265147301275	0.022463904893234927	0.05370117033392857	0.022613325186503008	0.0662851021600372	0.013484603469820855	0.027821257442385654	0.030250156117969204	0.0495425366965554	0.03398376506935091	0.10603829528157013	0.034917713524537174	0.050487541401547965	0.061735869428361345	0.04819542859224079	0.0663165199900947	0.08631788103950647	0.022326586658326875	0.01101567823798248	0.14214803090812378	0.06120247096954855	0.1214854263670128	0.12864964889964012	0.12389254460943441	0.16501670297057217	0.013915499837938208	0.11833713595308142	0.03819440259679663
C0_114965	-0.008201813169737757	0.11372501973060462	0.045007850910031635	0.024399267566534877	0.021633864018242747	0.012216201252262358	0.0699601342302557	0.004915775314349763	0.07485055860878774	0.056330208594062264	0.04696305027948056	0.07624929017709407	0.0374259779568592	0.031286806827300936	0.07222796734693819	0.05793979334241531	0.06717326946198818	0.1668221287909253	0.12914910102410293	0.03531452038098855	0.02833377881549652	0.018615082427592494	0.011781737757380032	0.031043453657882393	0.006862039284372358	0.021749998828852618	0.011432672941653595	0.07459797646726064	0.06341103902006077	0.05382155813332812	0.06165903491272486	0.03428196685513571	0.0684878575429448	-0.0037963751523521763	0.10203235409714552	0.023194302373828045	0.020171683344355346	0.06152030617846372	0.07413687544572632	0.05379308568319227	0.15281424031243485	0.06295105205291662	0.05162146370608386	0.05753111542371361	0.03381247295560485	0.062185320374565964	0.07493483437610718	0.20743789467954257	0.0535572762211912
C0_116009	0.05623454865071718	0.04574679141398646	0.1186381232165343	0.042519687754413955	0.033864127193751536	0.04756630315346679	0.014606522318523897	0.07242608811578863	0.053927202399941324	0.0402791437158314	0.06664458040998121	0.03730574448966687	0.06153053456762469	0.04860156501377013	0.034161151627570774	0.05195568076761103	0.07786290590699814	0.09476328702474403	0.14624847357630644	0.04924908356237471	0.06415641071867087	0.10880419207517732	0.07878160037098149	0.037977561576330136	0.04258176454387205	0.09845763439338841	0.038683179375562524	0.07894461567516645	0.07525377586586136	0.08536470775029029	0.00774564213622948	0.041724894070589186	0.11053558895718685	2.9194049499503647E-4	0.057635643082788714	0.04119770110897686	0.05029873407973266	0.019588764173498637	0.03112068951353403	0.05152980554162268	0.06123757807429476	0.03245450864387776	0.0891265035031055	6.273260318436924E-4	0.00363208431002089	0.035514277608519544	0.08720803606109104	0.1542678769603753	0.08912218408229379
C0_117129	0.029900508378564953	0.056152636070899535	0.1551397808317819	0.0649362291369169	0.07291040720716785	0.06008500741780156	0.09528481966605998	0.028544433099500333	0.02744866774784887	0.09237738332302871	0.007706307322481366	0.05144039014229085	0.027403605465732152	0.08332743340519998	0.07760808154792767	0.05142170442928138	0.015320177168159445	0.12309613671599787	0.11847231779387309	0.11011501645200748	0.15275840213215797	0.1217323886412929	0.06922222581850503	0.0618728365616565	0.06258404330544151	0.010238458371918295	0.054624866315109134	0.03146897988120058	0.0394649298668081	0.10157037264559778	0.07777559589625324	0.1339667459208378	0.07955510001912756	0.044675297497033715	-0.003445105638389911	0.004151950757285112	0.0870838897899307	-0.0035459212812154273	0.08075096587110325	0.06524978533883471	0.040583500057368764	0.0670785526683043	0.03697727118491289	0.08738121806396237	0.0601978495389998	0.08215085656849734	0.14282590658317396	0.1905625252755436	0.09947571349016777
C0_119020	0.09352078196062447	0.0016502308249865343	0.09379836220172097	0.11311027998024799	0.06570215040500255	0.05473624163983085	0.11999145531407891	0.05786510943605985	0.059482718604047684	0.12359619473430015	0.025239130418070823	0.008500661865129029	0.08439791802640868	0.11461168740307272	0.04680564249891774	0.016540742034073422	0.08133001491117597	0.0509938807699553	0.046972143964290676	0.09351702648030141	0.09596942537104915	0.15343241042641892	0.05618458208314981	0.10389369330087583	0.012018828133301396	0.040539262031966034	0.022412039074913296	0.061895863956699625	0.05068679708068848	-0.002173661730740878	0.06481346857683871	0.06806343510446636	0.10465315905128247	0.08936973568451528	0.08415370449538542	0.10445599749435065	0.002365986601903219	0.08868093045544884	0.09714287693484076	0.0827428754490603	0.04391465512567365	0.10485951131246683	0.08625713614584532	0.0392318500896707	0.02198347288707244	0.058378731717783544	0.09078989227738869	0.1511073487936456	0.005351688476144234
C0_121689	0.07282521360548538	0.08066613991572166	0.09749889425521246	0.1089275948661152	0.11548173249304702	0.03555095493135141	0.050348540350305046	0.04833537859773669	0.05705645798933895	0.041958910358851007	0.06728982666747149	0.06763821067238805	0.02881214524266809	0.06604535886827424	0.0724788167375131	0.04677159445801445	0.043038268545611214	0.12901277026887295	0.16225157296641632	0.11625149492705021	0.0824555022982169	0.064834240559217	0.006143486725733435	0.07970347458412952	0.0640483538359181	0.12436793311403194	0.054303916932292993	0.022375344285574934	0.03143923031576147	0.0810484921036776	0.014621958110682171	0.025629497479221778	0.15005860251536984	0.08206595588675154	0.028012291473374806	0.07841268075000943	0.05074521371367488	0.06155023585109858	0.04017225957511229	0.05333569934746437	0.09237051419106988	0.0936688624783414	0.04822468704137871	0.002065540295680185	0.07274554875040125	0.08414934658303243	0.1191408861693292	0.13772002953592588	0.05939513839159734
C0_124636	0.05380225947311228	0.052195951815399474	0.12057139790868214	0.03489192001167161	0.07708244186642926	0.04622301660721331	0.032445542037411124	0.046729118299428225	0.0838961009441743	0.07112821801674239	0.011419296343105094	0.08067561452381797	0.0743217469322947	0.02166937208674753	0.03939813089721399	0.05600188392965843	0.032517346010417884	0.09104780344956304	0.08215676253076723	0.11352507636361626	0.07211177930066039	0.05440149308497948	0.04707406658311191	0.014923346965525934	0.05013434867236127	0.04024972112130658	0.04152219495628809	0.07524177687477275	0.006775097995596261	0.05148454792281971	0.05961280871775552	0.040218563482017466	0.11055503329864613	0.049534945320704155	0.08585503744274817	0.043545056174310766	0.06014381674690959	0.056185718023590236	0.03248321720711816	0.03195908514957373	0.07746508649582398	0.09096909062552495	0.06734683683161648	0.037697981010657834	0.07015330838051435	-0.0035830934555412053	0.05955174507436086	0.1807084958272581	0.06464106360930032
C0_126365	0.002532361952735935	0.05191635510214349	0.05288147543576341	0.017622109134336945	0.05805555732385497	0.02227426462426733	0.05617582114423641	0.028044572365863826	0.04470540575604446	0.04572959204254277	0.061891470035868104	0.05755100734164213	0.07324774075240147	0.0655641207855514	0.04290537144235772	0.02999378090881973	0.008657819035644191	0.03351976609116802	0.035820084401751495	0.04537269070325352	0.03195182453673087	0.08937544311297307	0.023076191615642873	0.009585308116465952	0.017605141144618693	0.07049373272321764	2.3946191942388677E-4	0.05697608108761359	0.010571835444809415	0.06070027703169815	0.04710516570340722	0.05520924798916134	0.033600827474084244	0.014698485675871105	0.02976354602070738	0.0585506734766451	0.009143168614308451	0.05754907140508107	-0.002340943897839398	0.02977835236294227	0.0264708197686922	0.037555476376057856	0.06146224273036865	0.05732130446996448	0.045024305811823546	0.08483268943309405	0.02422943385257568	0.1139047968353009	0.0825331334720056
C0_129072	0.037970509198588485	0.0061530281878234795	0.0899705817667582	0.019356134481287274	0.05084201743727372	0.02127866354920664	0.030104413622449606	0.0011439372035696798	0.07737283194561867	0.04760084860567892	0.008558578903218773	0.03532569330078295	-0.0010792395111184727	0.01673834971311422	0.055289750217493445	0.05745122586119347	0.013696676251831954	0.04925708477462586	0.011430534923966033	0.012899549233922497	-0.0026128913800697205	0.08932958518144489	4.179970659048557E-4	0.04716389779221603	0.014530247556024518	0.05966675831945965	0.052547494905183775	0.042300609000804644	0.02399669797255902	0.021637868504797608	0.030620502338226996	0.0041665360423389485	0.013192273369808766	0.0668158560786527	0.05286580997079082	0.07594531990321185	0.049889567860943076	0.05881883194001991	0.050546722672547596	0.041695696279638296	0.06700827378284283	0.06508661846281172	0.06078310873010517	0.010089609167142332	0.08515973782204743	0.011848127199255478	5.691559268540384E-4	0.06154281543887411	0.06439300632751713
C0_130279	0.011411743759674811	0.05021053951740003	0.046187189717591295	0.04576192765795549	0.07219713071324886	0.03641801834410107	0.0701569960797093	0.03498929692970461	0.04888679310192368	0.025497843547905477	0.028686926610710324	0.0013637064046287054	0.06102133538642774	0.05468698077883821	0.012240011963866038	0.02085137399777741	0.04004900401625964	0.0872962344999368	0.044388908914809434	0.029378485402439394	0.040317776584315804	0.0569575110114084	0.036407145580840204	0.03765454307592471	0.0396188416609216	0.05818426837967199	0.04075394496154564	0.05551521299355542	0.041934692895195545	0.054289391970781045	0.04840561685961954	0.007922975494621202	0.03711919139813848	0.009515838922665299	0.0785598962604192	0.048590246598516525	-2.1193727376561105E-4	0.004365982590540624	0.019256518717815915	-0.004924098474952048	0.033480246540641884	0.07082118239466512	0.05851126653220721	0.10576159708362744	0.033136649713225316	0.03478370137056656	0.03113272080916657	0.11197686624266724	0.024699225176084014
C0_132139	0.03522480092774323	0.006349025316545772	0.011284860595853602	0.05098977746413007	0.061992760664455325	0.01245491815627402	0.08487070442217291	0.019263611702606195	0.0830620907775668	0.016055013724786134	0.004978616268693205	0.04497421369287684	0.07175179126925657	0.04806582230747038	0.030374584490901718	0.015053875790580516	0.04619356173331187	0.062009687725593454	0.09323334418402006	0.07255153696848853	0.06599923625508312	0.061312748351428005	0.05400724467162582	0.06904673595405439	0.053954710219140604	0.041641501064920455	0.022606300178390003	0.04057642956555349	0.03151654405350474	0.06675046759375987	0.02757986907057392	0.04485496961902736	0.07639321101976304	0.06118893680344942	0.06359822393989104	0.02625153291692463	0.051151479809230536	0.01251976789421312	0.05303590407658256	0.040200670078576	0.08066871925235532	0.008490124395087726	0.050800717793351095	0.05529841093561151	0.011136683148170774	0.05641628094108972	0.05115898980628072	0.052897711345949144	0.06447014643169215
C0_134916	0.05961117221783684	0.00411596117147811	0.0779494133571321	0.06649165530049936	0.05071972989670197	0.049095635208029176	0.038099273693244035	0.06326811197092513	0.12392297014788507	0.051013404071100776	0.0013024476806553509	0.07140331641563184	0.05913185736733656	0.05663341981562209	0.059415913792410555	0.06204386619338215	0.07165846056672502	0.02706863297725134	0.080619726098866	0.05584233860205937	0.08145491507242959	0.08280765740639263	0.05851398958486861	0.02915247229380157	0.07384095013490527	0.06616040334880909	0.04853090220514141	0.03984674554011582	0.03527690598523992	0.058017809547773545	0.06349429946407062	0.04406043709422732	0.10628057233689495	0.07413080586382048	0.02631286383002422	0.05243880886828218	0.08157503421507485	0.06478844750302072	0.07112643536223945	0.05558036155606686	0.0698285315175047	0.07295067059040299	0.10312422842652334	0.07895148005516428	0.05418702028613568	0.06180670925782459	0.051361676283920035	0.09487213934907025	0.05966033721577411
C0_139219	0.04089708493801483	0.03666061383512309	0.07339178686824985	0.06358056875247617	0.07513393466360618	0.02612840006587902	0.06534066407332172	0.017563234927739608	0.04359895425519855	0.02971710499025522	0.05902199206977534	0.049005166703177866	0.01165136552732156	0.049255158543069395	0.040180373447103575	0.03286436136771041	0.046844762232138286	0.06602007449830001	0.06212615519239026	0.028295665086927182	0.06986214129448719	0.004826498285655852	0.06285384574234394	0.005643259453589321	0.06404476743208225	0.07531077281698009	0.02237546404736538	0.03192565839805682	0.051610722890062966	0.06412789434995415	0.03900035112033822	0.020158855059084706	0.0618076711590116	0.048083258292373504	0.06644554244981973	0.03847929468085627	0.04403209127693311	0.08378798267706564	0.04793153574508199	0.007807672577884611	0.04560590082587672	0.04126217885802952	0.0471997544622232	0.04714369259307753	0.057435478486623885	0.08286141765555204	0.07716371461013119	0.10582752274542374	0.06700310734997521
C0_141354	0.027648227687898583	0.05881790431788434	0.004692801103870602	0.033203025759274404	0.03811815657177922	0.04089689443524554	0.009942670623770671	0.03188507866555928	0.07253379217726498	0.03470067024115384	0.0029420991097862327	0.04239193989019951	0.02899324106824172	0.04187920661252843	0.047582018058855605	0.07026770317651511	0.004295585311464076	0.040092539782800245	0.042931179510291934	0.062288108274514475	0.05703390809969973	0.03522896051780871	0.031449673836724375	0.014099348990172542	0.004936752755049586	0.033808667606202665	0.011114174250708448	0.029769295752163836	0.009777691397691657	0.01557071725482543	0.02513358310762985	0.06067496368431433	0.02087159821256997	0.01213768444127124	0.061500352261602435	0.009349101062146073	0.048661210614559886	0.006900312011595852	0.07487832834069595	0.052023500575751384	0.07755387305665164	0.043994315150188104	0.0631833967944994	0.07975707106210442	0.03455554750317788	0.007461885022548327	0.013453705415703362	0.0844577817373441	0.03504704487326269
C0_144000	0.008605882787517748	0.07676753419099692	0.014171182328100955	0.06187202020083747	0.031716749324798794	0.038849909214213676	0.07918958177542641	0.036559433859127737	0.050225254051289685	0.009340648518935277	0.031004111070902944	0.039156344338207895	0.06518112033871991	0.03470344551004435	0.031640090623263284	0.0448796963403545	0.020031968411123084	0.04537777785339222	0.043684539520009946	0.019919547889507092	0.03062101593309421	0.042314170779787726	0.05093294854644824	0.029776408310178505	0.03505785343794366	0.02994646268565157	0.027709002918141212	0.027106476857116025	0.0472099917056673	0.0400004368825955	0.0018762195764662633	0.05672550786541403	0.009163371585825785	0.046960658317958086	0.04125031417174556	0.017045468769223533	0.04321126986808066	0.056350430810275486	0.04690501402049676	0.013792940124537472	0.07776201898498572	0.04219049050467203	-0.00537192334035739	0.04665031351155068	0.02020170661672884	0.04704449550834403	0.01845386496791229	-0.0011006156102665696	0.00357349818183215
[truncated: 141 more columns]

## Sheet: 20 Gy vs. 40 Gy 80 Gy IMAC-Cu
Supplemental Table S1. SELDI-TOF raw data for 20 Gy vs. 40 Gy vs. 80 Gy analyses (IMAC-Cu arrays)
	IRRADIATED GROUP 20 Gy DAY 3																																IRRADIATED GROUP 40 Gy DAY 3
Sample Name	20_2_J3	20_10_J3	20_18_J3	20_26_J3	20_34_J3	20_42_J3	20_50_J3	20_58_J3	20_66_J3	20_74_J3	20_82_J3	20_90_J3	20_98_J3	20_106_J3	20_114_J3	20_122_J3	20_130_J3	20_138_J3	20_146_J3	20_154_J3	20_162_J3	20_170_J3	20_178_J3	20_186_J3	20_194_J3	20_202_J3	20_210_J3	20_218_J3	20_226_J3	20_234_J3	20_242_J3	20_250_J3	40_3_J3	40_11_J3	40_19_J3	40_27_J3	40_35_J3	40_43_J3	40_51_J3	40_59_J3	40_67_J3	40_75_J3	40_83_J3	40_91_J3	40_99_J3	40_107_J3	40_115_J3	40_123_J3	40_131_J3
Num	1	2	3	4	5	6	7	8	9	10	11	12	13	14	15	16	17	18	19	20	21	22	23	24	25	26	27	28	29	30	31	32	33	34	35	36	37	38	39	40	41	42	43	44	45	46	47	48	49
C0_3230	19.469666063498554	7.283014588275291	9.536267819542491	7.445862610872702	9.861505504910312	6.115293977282439	8.410838648921244	6.854567298997733	8.25734751029291	8.488359192318807	6.660210922223617	10.33315396351507	10.024297024362467	9.135971932087795	10.670950183534067	9.52229192681913	8.050462320938404	9.716547539081436	9.152706729315675	8.206842348104571	9.729285274657427	11.774429285695177	9.201429672526345	9.256180310411173	7.924941560306789	8.297680170293907	7.62134384664182	8.078752762226907	9.57803766244544	8.726350351574188	10.496989944280417	11.882635093342302	9.776241812662745	8.126871701840487	9.932966594989418	8.529999852004465	8.704793986092106	6.358270583013986	9.562423073595477	6.578746821100926	7.536464876294468	8.34690569993423	5.908764111284613	9.012413170596302	8.713301148312375	7.144590032876215	7.183207891757204	7.75182749508669	7.571856098476537
C0_3357	20.457606265834073	9.029027339042655	8.396085621773672	6.778477869950225	7.323901002387909	5.60724254072394	8.12562854701548	6.2029978432730974	6.092985841568199	8.111523689178052	10.65269651450138	7.70295027070406	8.112700534131829	8.101127159115173	8.865147149714266	8.826858516075125	6.879396065676782	7.5442523273457756	8.059247887859955	7.8717054213817015	9.057678701071032	10.85214162686723	8.388941477969151	7.911896234944109	8.135946363619157	7.88992366299763	9.010988807145266	7.148319214178461	7.218277784609999	8.16511138400857	9.314416610987207	9.5841776848282	8.496851860863801	7.607137724601735	9.148080432265749	6.944082746453429	6.495779664578625	7.239088517316603	13.4220590382025	8.078210511562599	7.59645752526791	7.654656846025775	6.327187926192286	7.604263426172715	7.891887582360283	5.982615828298259	7.740803587103394	7.487650672167303	7.236571524489132
C0_3437	14.125848676774904	6.861720865236432	0.7089471318603341	5.840496585880476	1.5162767285849366	10.274313007365947	0.7312113345809479	9.355213926044103	10.731516229372902	12.219761813348239	11.017078107616113	2.09312682950119	8.628402275681132	1.0709037486683106	1.4776936215615548	4.266817551694822	-0.4064328195565822	6.514415329001521	0.042009022478287375	4.079499554803936	0.42999351390919777	2.367497644138735	3.5509502562102324	3.330414881159802	5.00333645680144	7.6886704774506	5.069118139085135	1.65089076780737	0.4439064123974781	2.0469880833073524	-0.18262505012752242	0.9760612347062403	1.7906833436465792	1.6999759540765051	1.0601104959679073	3.8901747790099845	4.048906077979375	10.443380441890245	20.217358390490975	3.8684308262186318	6.73268637169729	13.404351182981625	7.626893458802357	7.696478236481845	3.7324574752056137	2.420632469173571	11.591743163261377	18.047107857935636	0.8760357517724249
C0_3510	18.951084566001633	7.467249423993773	7.892829142474388	6.921467129740009	7.613903960974274	7.2700120059880735	7.0888807252525385	8.192743581147276	7.754321497149865	8.530293382955819	9.782425781325513	7.373172358276085	8.15253699809678	7.402289374125947	9.309261053713225	8.082835241802393	8.240851762945372	8.040093580658446	6.9357932097129344	8.305816519009444	9.65801565007181	8.640956483271502	8.644221459902663	8.9960130399061	7.187102730157983	7.30214278935312	6.669308928858838	5.987509042626005	6.675437149326787	8.04147403367274	6.696415437766933	9.795028607511165	7.725695244666307	7.748723245462312	8.655557707062627	6.987325312057032	6.986828361164033	6.6061614997690254	22.4318479279723	7.864872994392816	7.636831521141774	7.746959589978483	7.719501168707163	7.400083305131533	8.994162681994066	7.743430697899259	8.502720397396459	7.182742464480128	7.520276334271571
C0_3670	3.569830792737844	7.219967498665563	9.828214497444222	7.855132315117104	8.412485329939619	6.051606788338583	6.998349787504178	5.980392805764637	7.00950925125235	8.550279265164411	6.9254491525518365	7.589111830598665	8.25648975441539	8.224512485836144	9.226534627474953	8.298038589537946	7.184207676658076	8.744972736926385	8.678907976471727	5.684603822865018	8.539637429866497	8.406168619688804	7.393914484103696	8.550561660180264	6.782189153993704	8.883140806117785	7.0107419609515915	7.761172518997745	7.6553727657791075	8.302229023527067	8.12014976659998	9.949098580434748	9.839922431103217	7.850430783889622	9.28636369439473	7.195578558135881	7.0423825461908045	5.811171531544332	3.243011566789311	7.395193815102149	8.29715399567508	7.778583475059739	6.796544491778963	6.222039344018346	8.489848357414553	7.738877585806777	6.658554170052292	6.449433914358209	7.673951555059618
C0_3914	6.8067922479650145	7.950113543378807	7.543642059575279	6.568428005583735	7.36666575048728	6.551590654570772	7.090790946237899	5.618297987217489	7.796454120290661	7.775862397901731	5.34344640896534	6.747828281455786	8.420612663702421	7.946294270898313	8.745312524170664	7.853944477508639	8.101293147669157	6.477981069201408	10.078483375680344	6.183846346478483	7.639554300679405	8.155881728853924	6.921677543053452	7.868930354664813	5.568981651732522	7.72480514281187	5.861024771004934	8.731594183599722	8.950827570711624	8.939045019132742	9.580290077198747	8.243726313513879	7.647353602738884	6.707707941280319	8.465513597700275	6.304879200329161	7.447795028655748	6.608260271821461	5.476499602433645	5.888442996105042	6.6065728046627905	7.737313048240361	6.638992410540799	6.49774815565611	7.952398345744765	5.340466860334892	6.336259092391808	7.47025776685475	8.705573517209837
C0_4249	35.62483125823611	36.09225320634789	11.965598086127041	21.607090055768527	14.81230497232634	59.9165071019767	18.777729029254044	73.32782327001482	41.343026532856655	52.196663575517945	67.60993395055824	35.768362516712166	66.34967175436678	23.431867779507122	7.679123040550433	25.251221184932113	17.964753885755	23.34560203165577	21.53152940085824	32.70789801415234	13.985282203650884	20.99175642023986	18.41342323344049	15.708159778648373	38.15291066305078	39.467016459929376	22.04551071420982	23.17619389681024	14.138200805673161	20.34778480560725	8.990119547886191	10.49791135241847	11.318395344175118	26.28338588687461	11.585636585635317	23.989702176119227	30.996715331712803	58.95384165552494	64.10100481838963	29.789798013750712	49.469108443007826	68.67358505269438	61.61816656004431	36.40586635592166	29.246715819471213	26.85146339551126	88.34057357978313	61.26626263079329	17.08833068520744
C0_4425	13.530173196842796	20.536588483954894	9.02509624846491	14.224124460154803	13.14630888396825	22.026150165565866	8.561596900212603	15.952614383972602	18.76370593588853	18.194738867620806	19.57659559114192	10.402590883600498	26.998220936617653	7.148231251734689	6.060569621393968	11.527840976798359	2.7034391109565936	9.9897557073892	8.76764496900813	10.113382519055397	2.826045290400903	5.046549258953425	8.13651180661618	7.168595559305467	9.926275063056652	11.459773438807824	3.47956379862992	9.488254161167925	7.677679465437659	15.011229660005034	1.619352319164079	2.934816763798992	12.368335607451684	14.691946330798867	9.094811577654257	13.262963251327859	22.001621513979682	22.47265436141424	23.37511458701615	13.14390068947742	15.40615041964985	18.078720513138496	16.2163587088559	13.731875771307406	11.040424960772455	16.079896406942904	26.32333026295023	23.975667282828006	6.780928811618051
C0_4685	20.545797758250558	20.03393300686823	2.1000319308111886	12.081391061822549	2.878758113241454	24.058773932376333	7.447986909903138	41.60686869754239	21.0542432757259	24.58679687213511	30.464490362475075	13.181327339501566	31.137792688632043	9.351929292617909	1.1073481248455264	10.750276169141772	5.731783056141911	7.5240854010363485	9.002420013984121	12.362451014004824	3.2755477999064038	6.884031229736895	7.158885936618284	5.785226153046129	12.834750428527414	15.137636777773118	9.74763080486557	8.342288476892165	5.330230026646143	11.194898273146183	2.7813000817183755	1.8886850531486699	1.92924519673159	12.051133995203903	1.4245214581043901	12.982151584322668	20.102713930963148	30.214963416635882	34.02379031416483	11.863309047210047	26.76979302083258	31.469949308345104	31.9205592290656	16.8968014502127	14.818704767594102	12.37112540907843	46.782851849736694	26.917389992185697	3.2130394909147024
C0_4785	17.94911945941057	10.984348423542047	1.3389558152413916	5.757419850236593	1.9323248648024618	14.495161359588533	3.134830404205922	19.950990755317697	11.612395452142627	14.315610644475175	16.058571206546873	8.887646424459083	15.884862286215808	1.450133326730452	1.5445171161177977	8.403719504522895	3.1756009804805365	5.1064222631281435	3.9308967182530172	8.931336395307248	2.495266199058106	3.7398621083572214	4.144484962865583	2.9665212338309876	11.611304928463872	10.5886220988303	7.963067812000444	5.186651263102648	2.1113854933627567	4.819985997006589	2.050053055408886	2.1837367928739657	4.841764719431676	3.390160244130353	1.6708225241789225	3.360821096006504	10.382981907984933	14.854041758704861	19.40100284268146	7.164580536079601	10.739055962098071	16.631481466294424	15.08217397055457	8.634204302469673	3.6788848320459615	8.685733587318222	25.12545411914783	18.95973797724203	2.9635947591061047
C0_5085	5.575486454811469	8.50452816360157	9.567560940785414	7.151486569392486	9.23491489204952	6.910300313888997	9.537745781648889	5.903299689994697	9.178947485124102	11.364241552299939	7.800036514279634	10.86521377991306	10.642236594329816	10.325375673757687	11.691807617612081	11.15568338133742	12.760676940541547	10.23429093915268	13.974172749022582	10.118226816601577	11.453941034207903	11.426141908339277	9.068434959431272	13.560423675806945	9.426797311451471	11.924347233655926	10.727845817124836	14.216385394159767	18.434502384957447	20.39683797880518	17.633886108529275	17.222569219646683	10.470354728279903	8.666665227935393	9.771563800690446	7.983777746398393	8.818459011964885	5.920325821468025	6.470795093830436	7.725555330357542	8.477352920408121	9.746843274856898	9.297693043368788	10.126349996966992	11.45545076139589	11.659041028369847	7.867567143740546	11.171091514365578	11.536570031576753
C0_5288	42.14518111489338	13.000429733816663	10.129258785759452	11.686956783480431	10.993847213044432	9.129707012926014	8.048522576613903	11.456037143645275	17.975547910066425	13.573822676853782	19.9972455210703	10.779310710312362	9.179581637792015	9.16876824934776	12.421825506091864	7.804479914073816	8.547611304441206	10.055902800151243	8.6303641452524	9.298621112507844	7.348061239298828	11.829051328960487	11.47857851033673	8.85004077022613	10.665293219492291	8.816723859259378	9.738130515085565	7.3447457079347	4.002313260954326	8.371354408637389	8.128544945570736	10.05927815660996	10.461601821332561	10.733856808428836	8.05972656795573	10.709899439477127	9.310533446924767	12.088117727477076	26.529707367036732	9.893169736554814	10.665999201230122	12.901889271221352	10.733632728892811	10.308280658921463	8.9094467526138	4.189349610906585	14.640482450369616	8.946886898164191	8.151474293627688
C0_5894	46.82606709404662	14.49491927417252	4.638192221480109	12.644454911527076	4.62182517781958	23.270294265724303	5.718504461404992	25.68729869231031	32.083584199021345	29.739546547345842	26.976741892714823	9.760549106089574	28.327597712209112	4.8395892090164745	3.843667043927311	14.978317414667934	7.796952300069775	13.47072818768779	8.12348084303427	15.525698678115631	4.470504917797554	6.129727863997932	8.6194519851098	9.782690492647456	13.069005110059603	12.340248022298487	14.592876204625712	9.99274495218815	9.500172066264437	12.204715787923952	5.540441712016724	3.35112449564494	3.4540272382933517	4.346267022857413	4.8648445296029195	9.635480856729894	13.759136241368441	22.07938043777899	82.67360420603357	14.429870535108218	18.108001029557208	22.221355861040713	30.064222963213847	19.65814257843938	12.63161246492652	19.36373706810884	34.04010354037945	46.44173150796878	6.2084094443108615
C0_5995	78.94479350898894	19.970137380195453	4.103938523860443	12.326849667315292	4.888729203334826	24.285449652862507	12.145980223342178	30.900991284357378	88.25377769780245	70.28837335535461	54.603169323276234	28.327483607785357	90.0578583901448	9.493410738821366	2.7265475346258095	29.62495943028843	29.867171683009765	22.414280902411722	22.099925049168625	43.12758804977628	10.654540681536874	12.376645985956353	16.263775792512654	27.830939738579346	29.00850251070228	29.22028564584532	47.76922066296537	35.50328167267441	47.38459878236059	39.9677431701829	17.0563530213477	6.784470473829012	3.2001597108663935	7.4226222534482735	6.255822024649475	7.422121306061551	17.640116680683118	27.367851845575828	140.09592555416498	19.46852369625858	32.95911725363046	46.788424141054676	77.45739834963229	52.5549498020716	29.138131002851647	47.83330770395902	33.36717761740834	107.80412671087052	16.485264171228557
C0_6074	181.60681340976606	22.123407322978647	8.66172580342387	20.729913283082706	11.176374275524413	28.88015295099415	18.78983201171735	37.287229317513805	72.73899945694625	63.91007540212095	58.05034939008914	23.927224607879722	65.02069116694538	10.363812041185257	4.820162079306374	25.264601329518424	23.70388594948531	23.29946422933691	17.58325172162997	40.10916739977072	11.450611555522503	16.706949091866242	20.406496211552753	27.854788486519126	31.821418608497535	31.717185437798815	42.702504647810734	37.00805020559814	33.23678932474737	29.80829951255092	13.259569580532647	6.837820023198694	6.355201361492137	12.70925196453507	19.731564368692183	11.972436467866688	20.74179559465274	39.013402864673196	203.21511327747749	24.56127948039129	38.09289742018512	48.980018761644494	63.124660404911616	50.19805685109438	24.21045708401009	32.46185681884345	30.91443759220681	82.87039383553082	13.653871203202604
C0_6142	131.96625212890388	22.727682606402805	8.83041739272913	15.185904475879829	8.084801374406293	29.765951277590208	20.897351569940344	37.43937396506866	137.32667773766113	118.500245255501	80.74014916128935	33.19657694094252	125.26486659083643	14.982701330215363	7.007638963538558	36.607453718065756	42.77966911057109	27.501833361443243	29.601993954646233	58.8970784432574	15.424005987604048	15.705947396415745	22.26292600907859	47.52403614738994	41.90889585364494	37.502929587471456	63.22972032686686	47.81322409128101	58.255607798462755	47.33910942885334	17.860515697265097	10.35987428308555	6.534289675585443	11.452297019391647	10.646665345302713	8.876856809445547	23.610634999761846	32.44719171228869	228.0357367097507	29.7520371018038	59.48026183123671	78.57153922885341	118.56119702177784	69.99778905988781	39.94232526066917	52.8628318246647	35.93912566995426	129.6794221570817	21.384816988370993
C0_6333	219.90482157179352	86.12898903482515	23.731367863115718	43.57614113401113	21.361070289880168	56.243924323107656	23.458614331216754	74.4846086235242	150.69775531990567	82.5879896430643	130.80540959523336	40.47524832412428	73.38086529887508	20.936916557863015	8.223572129507016	37.28233897599959	40.30480823825568	48.149967658025375	26.310233377854434	57.44261525587896	21.453286403815966	52.56110292510644	48.90404921762772	32.64915741358603	50.32034812516626	35.863854876587894	41.27029953647249	29.838556185185908	25.35234337795524	20.07185342117395	13.768659825032307	9.509670668250674	32.08890401324764	55.63374523283289	28.40628786948062	27.2958935781927	29.694693851303455	70.09096860179928	142.5246530200463	44.43994691567246	84.73332490701414	88.24718224486986	79.95202166852248	60.99281702970025	24.94462818693394	15.569390447453788	106.08941208966507	60.81256498392086	32.1890331150263
C0_6461	54.23633476814579	14.6284344539334	6.627696336707624	10.66232780680247	6.808065971817223	15.034377874751906	7.229459001999905	21.217974946326258	29.890321923247832	19.313889652847923	25.533383645902852	9.028604300030702	18.756156698715255	6.094805589165911	3.858608650293343	9.064103988209073	9.792315790526954	10.826132334889524	5.4775602183033945	13.432019871555674	5.329868411360703	9.882428710240747	11.41110250178571	8.082256522608386	10.53755453135909	10.437785299598854	12.12138660760341	9.94935917392151	6.581816803922961	4.7735836487299075	6.556086019714198	5.127545987153851	6.667181758376014	8.704466736282175	7.166416072176428	7.714872970707161	8.321370458317144	16.960188725898405	50.30239693933212	11.682330793500295	18.11428360544192	19.641690376886956	19.886972521015725	15.099510597546452	7.546191728170918	6.802434220123112	18.80568174861942	23.906319995753734	5.649786092849013
C0_6689	32.784579763789594	13.795908950722009	5.464181517474617	10.404028549769393	6.875800368622925	13.31995048890068	6.490145985386946	14.937821875934885	21.41967066835058	16.640686468934245	23.093014505090437	10.182616065542167	14.708774313384799	5.282114171519295	4.482538846048877	10.339853640635205	8.552833458146388	10.518532374189897	5.812114452182483	10.581992433496291	6.089487536862898	13.086262841777662	18.892889015547272	10.737959328633467	15.287146701455331	14.357132433506957	13.528135911451088	7.060212102051896	7.583762089859724	6.525902947150791	6.716593722759394	4.356237135196368	6.594063346672681	8.643220384153373	4.86743455054813	8.389042014663456	8.362120790904322	15.375173697435228	33.924546140219014	12.750884694105103	17.62722737622143	18.123189504385056	17.653400106254935	14.514862303244826	8.159851837049406	6.4529050927974545	15.90644328529839	22.109403995891288	5.327648975903672
C0_6885	36.04787131276589	43.62933389131403	12.01534589586265	29.6943427404573	11.66678318335035	46.97819010902243	20.116163778652815	50.248951106915406	62.99767309800694	75.14936224343077	65.00311078749759	20.80941959428944	44.11990931815525	9.518849472510366	5.11783250326349	29.29514590831143	12.20936193520047	19.29913859959103	19.283097239855174	22.52600309953698	8.511560813479042	15.192516528482521	20.224594538162574	13.848160924334874	22.78503416973442	19.465819084159563	25.01383427403515	19.58259620604108	15.48888983775576	16.839345862444553	10.614986132729092	6.498114272290758	11.452269005070175	11.492377452258488	8.233634583935167	22.558946617304013	26.378636066486255	54.08660224821446	67.63734770464346	31.7833378729521	40.353192328985145	72.73199072033684	54.61727981972164	32.017547972865515	21.84815445723583	24.668400463956154	50.26668259219039	52.50291962620652	6.084449511556061
C0_6924	17.63825870308678	29.15094485705117	8.60468775623199	17.508665453475803	6.626031550160662	39.11054522319492	13.843078510827317	40.20554201751765	21.199866428836835	24.176004743190514	22.370074954553758	10.047528308012552	19.677941577985987	5.355413639218821	4.029071311230099	21.03079030609132	6.970332709246867	8.655710342908765	13.029104340845539	18.098288089844374	6.251326848782188	7.816680697350347	12.874196165472386	6.578200897117418	10.465477325618508	6.8283449577296675	12.24346717786227	14.883626299611567	14.167801069425357	15.7450496589586	4.874226698551199	2.7828833833397204	10.900088281455142	10.18516733693982	6.783543477710891	12.16406233825136	12.275206832018958	39.90037564443372	39.071195473040035	25.27293717240155	15.061339994803609	25.04588528369686	17.37075489828474	14.071932281461404	12.804281260812568	18.898185428988825	37.34039313120404	47.043183169292575	5.68913814303541
C0_7054	14.388729460706266	14.668206762497737	4.242910616958897	11.536406019344753	4.784601015894187	14.739720619942007	6.267545769822108	16.67937594602116	25.333661862742456	29.71094585561826	21.376544185879922	8.140598709242143	21.464675310930325	3.507946506204462	2.026795910043405	12.956345946486916	4.420644513659405	7.917530382936118	7.010172312796093	9.620236989450307	3.0845909307434756	5.761940103201123	7.257407111797541	3.675845029880779	9.230271032007295	6.815352799040212	9.35924713902191	9.351079808327082	8.576863775528937	7.490217703687225	4.911340414165372	2.8793114318802546	4.92771640876305	4.489087030814862	3.690720767859691	8.012120191754965	8.111195023065536	16.389323344926368	23.912447909388934	10.209383039808786	14.462373738783219	19.66963126964479	23.11762925595471	11.667692647452142	8.070069053422733	10.65654159509454	15.035196140609518	22.656098018033898	3.3955106286353796
C0_7490	54.48437494459042	112.07222053585159	115.12543272237036	96.59498269865747	137.5471709659351	80.83093567859675	98.75192880357532	43.972310158641214	96.11327149014755	112.51718990025242	59.66788142173189	131.37295713526902	118.38209849352482	106.88132040492422	89.0813927371844	120.01907026578439	129.62517884591466	99.5841057838865	163.01369195626435	147.39146911429395	102.23529183135493	85.94586692308808	80.32853207716289	134.30372339308195	72.5411046285384	153.32443562973842	136.32107844059402	164.60731915266004	191.7293602663834	219.22941288029918	252.71426856571318	159.65449690742284	110.94399548323975	96.29366352659906	127.22164063888863	109.60739345588807	136.39119002655812	54.65553141115547	34.56630613173611	89.55440639033674	93.49551027812873	114.17652888401653	92.03596450955112	138.77279681454363	128.84520587414764	56.84726356193856	57.5322101374507	76.43339918122257	122.10444189175608
C0_7566	45.06364534818661	74.59987498319086	83.55488695300264	61.540474683625675	62.935546143637936	60.804578250886856	87.74011980549982	54.81877095065086	91.55917704603152	107.26318409052938	58.12853885522099	101.18992536572823	96.67538309482845	102.08122892790894	86.3348190176119	94.94289257056623	117.07718341062008	90.86855932929447	129.2272406737116	99.8897887470159	95.92428968900462	83.67066004209883	89.99315450978291	126.97477358187315	79.98070448029624	93.2891171157046	98.04450597964136	120.2650926759437	133.82936833210232	147.0563788308588	128.30580167660366	122.43485444729097	87.89373336315144	82.15560329809846	77.02825103520651	64.70723579487665	84.07828896508246	45.081930771779	30.77216625006921	69.18215103211367	98.44849188642507	87.62098325013788	95.3641331029356	92.870751682979	112.1761679543847	130.80695594211727	57.35824571933873	81.9948820821236	106.96954633767425
C0_7661	37.425502016550055	26.57215444491429	38.27433063688117	28.218853833246154	29.901036150690615	24.682400518645995	37.14343120532724	20.67144860563633	35.8998996273731	40.60785879538974	31.126800925853757	39.85892979631898	36.69056249333287	43.6501502374734	42.093631299423976	33.91896197353042	46.14995763271901	36.86739308065912	46.18784858937367	42.24706334228611	45.70713794100996	41.99835861926748	40.005154383922815	52.11528876717879	34.06716699342954	37.272321098685126	43.5154979378085	47.71316728506111	52.04534004131577	56.01336640956406	42.754542435351595	50.20048960477019	38.29808512130059	36.673165415317406	35.95361075951425	30.611243389519306	34.236078835657665	19.42155440879905	42.41171962104283	28.44370735029862	37.00725476705337	38.005866564423336	45.50602786428857	39.971428740261466	41.06739659505609	78.56974695022619	23.812931325867172	43.81434198384868	42.68840851990643
C0_7929	94.1348467648824	118.0763978438922	175.02890170058717	215.2425864470434	225.0343305621555	122.22527765682325	124.01144625132662	140.75689700914037	59.845446183360366	70.80697499281673	147.71191323783708	109.01762291951188	90.50453702599266	130.43971319636205	181.01316600428413	55.905470554803934	68.2217639324133	130.91751826131548	84.97377270447558	57.996315521483695	120.05648392567878	122.29369837680454	151.92866181109304	107.53008348252501	170.25062515964322	130.79324876654363	93.72605253745911	53.64047657980029	49.74519530074936	54.744666314467054	82.64863045641145	91.56332726668307	152.03495764141744	134.24245337929727	123.28445437845424	209.79509783448873	172.6721954533654	143.12641993885586	109.06430041441094	149.51814914317544	115.68886513511463	105.55751375813045	122.03326102232299	97.8395068455679	108.34585144853729	58.81569767772696	152.14495545733942	47.77952724761534	68.2363703596407
C0_8034	45.951226979251764	53.34659318762233	63.433317314128274	73.67852220821699	75.89464657294374	51.161743920666545	56.89942480334944	58.72034371833727	38.441699957918	45.281580974662454	58.949288899241125	61.46115699082698	49.14850738475445	59.31887219080048	77.10638914056337	45.52987837118262	56.46835003251032	59.97878745564149	53.90715268293327	41.686600074144074	60.52447130309435	56.272232505385986	62.649552170394806	59.940448254723634	67.15998514114591	61.04663740973304	46.454781527204574	36.46851983832478	41.818378967683046	41.366695954456596	43.16791366013488	46.26437405049216	57.91714688944553	56.371573608793646	50.872404034643985	73.64038267773398	67.02831343971063	55.4619447537994	55.48210674704942	61.20765763854571	50.923903873231865	51.89427476177949	52.40043302199337	55.791315527265	56.17028621768104	53.71961973799277	61.499918423692186	37.540287112411974	50.8804327636066
C0_8272	37.149083812979065	21.78003776043965	10.43662906372527	34.91089902061567	23.95284833948095	20.206847775469246	11.467567250278536	47.10434969651426	33.64983612502582	33.28190144552595	34.47441490008975	26.8151487111437	32.97490583382311	13.659469546276979	31.06767709171517	14.847341161901404	17.244545650873487	25.36405296242481	14.339255712859012	19.761283815321633	14.81890310246962	14.1948573272928	18.708684048630186	18.92820668864973	26.35829014329847	33.848741964531854	25.45102911835143	11.416663036816761	17.600306121475032	12.316093813373612	10.919641072708872	11.162030487986492	9.629413039812626	12.399720827079696	10.251369915002178	19.818731538295182	21.137330068436583	19.542321490431537	68.16305749507897	16.0777470876092	26.579830476661126	26.65889230817817	30.176321368152564	31.506619102740977	24.387429592944446	27.811090332574324	54.636185788927826	38.13797523450892	16.35135002477789
C0_8358	85.07614785678558	27.319751508217752	13.924085875365732	24.475962785745182	15.341619218738726	28.111431128742236	14.096031358301786	31.958531619825614	49.08722472666605	43.15179020612516	47.546197956003	25.964066299124152	32.656984426861285	13.333358829523913	14.33502040497191	21.49333673324854	22.24520159213718	30.308180483702138	17.09290543613505	31.480049361634254	15.007885023164432	21.788330278620652	21.04593947061794	25.995972021783803	37.90352956624467	36.74795918635217	36.7274462158822	22.256676959085823	23.025310368515047	18.8051327565145	13.074953057759172	9.70198921132653	11.188881914528539	17.0560955114832	12.429027739531747	22.39152303431133	23.05495129217463	33.80631581991261	150.13747583738973	24.358915212149217	36.196277243038786	40.38700216040496	48.63993526574576	43.576265913389854	19.902196518764217	24.198344730047104	40.40646350232956	45.10054198460922	17.740421554916278
C0_8794	90.29518901526946	269.7212177248452	159.78044202857436	215.38966826655596	208.9152365985217	347.0793020397203	136.2840846115436	238.4112741379089	254.39742254935314	249.51274024546626	226.68906212997027	118.62693914300945	314.97167456378776	112.6299589612546	77.30576452233221	166.6905177845373	55.94564543056352	144.2546896782969	119.63180166410262	120.51496366833815	63.72394594044842	89.2009626886887	100.70121266471473	97.88116822318263	125.91552621248931	141.72040000432258	137.91799844714058	121.44238430888502	86.2145986052735	161.0990439810803	85.64731745467559	66.76829817755761	181.3132323335729	225.65923146318153	165.74330604116625	242.2095766049529	290.24195484941475	322.7884065020512	120.70432793838319	261.54899396370206	224.55296411878356	226.8081802539948	171.52987932018377	152.05289605943253	156.87238889064582	223.3370358052263	366.08783862001667	267.00492202149616	78.06778099934314
C0_8985	15.024104315199923	40.47738458870765	20.10959533726139	28.484875049145284	22.422842346254942	48.21623297176689	19.22075373227709	38.731875798246904	35.67576293969169	34.34480333890575	31.198122412571916	18.48268551466238	36.6743337688118	14.239261618442715	11.864536487290161	23.197397690464562	9.780958443971679	17.53058520649428	13.79122953472595	18.695893393856974	8.793363866648097	13.748281738355576	14.292465134496554	11.891422705281935	18.02637593022859	17.657117388419174	18.85144714595054	16.80557528871064	12.702589583642517	18.03474389182667	9.673335288205184	10.870598961844783	21.531233316783105	33.060406261449046	19.312481313016136	32.4776205394688	34.04388861943117	43.775272257218376	17.226023947961878	32.75157314261214	29.383062001640667	30.14296215855025	19.352811947319836	22.61579367253246	23.488744763035157	34.77844956159077	56.148479473123345	39.63532414037409	12.209128027415774
C0_9381	8.995669482463162	13.811204617783543	8.433488112192435	12.263425112295224	7.437573475342227	16.95507990033156	7.361877682412131	19.06311671408385	21.146935926006	23.58139351287777	15.05583432507789	10.364040507536796	22.306720518926053	4.248001445646237	3.470896069514219	15.739475984349674	6.64776805283214	6.729060417836792	7.869152184628723	8.844554897578174	3.3445551984415163	5.08365474866166	6.221957210827521	4.9160983361857395	8.849985984702345	8.209661538999645	8.406374229590162	9.115021766881897	5.175231574700486	6.125506392896935	3.7143425058205097	4.054182509314891	7.456654691218022	12.590064192461291	6.849238672111529	12.919962995944871	15.960300236163608	22.060755858419245	10.695696847672705	17.22198693864907	23.024397912899055	16.519089407836496	8.146192638385857	12.12610511808905	10.263724769726712	19.122559675239465	32.13741824027069	24.774008541707108	3.515926728750324
C0_9549	84.78955907863842	51.93140717281063	13.23977460270974	38.412146752050376	13.59151128494646	53.84462985694287	17.394979539346	60.337726771979675	71.53721768176005	42.564318747337104	73.04043170386828	25.260853497901014	44.74079534240226	14.314001122721775	4.3507369687981985	20.337730453635352	23.11768945861471	24.757700635473032	13.867673931617562	24.629553655717242	11.251069607056703	29.948144836977985	39.124869398369285	16.981644361593712	41.197732412273005	24.625769029351183	29.445986196562625	15.926120004025199	14.840509834899246	11.03696911054243	9.08010018848254	4.957497449870222	26.42589253705239	38.74259465939457	13.089475578625908	26.056530086868303	25.13100810855376	57.6271181984111	59.296544268721526	39.1679749652306	61.666447455366765	43.86069038439127	48.939888329080304	32.227902964972145	15.880089895887533	16.35843061171516	84.09131510159797	57.18386370800959	18.549077769115986
C0_9707	13.39382938141338	15.551056193212288	3.631877245566767	11.21483866132057	4.399653675961853	22.79265484752292	4.1328712245393575	18.2814626184591	16.22837144096297	15.348077779681667	13.60445289419705	6.099869656712547	19.997273570080463	4.168465753148021	2.004925311618558	9.708662916862835	6.286545103551783	7.615526120979416	5.151350013856893	7.992224696595694	2.58715856072667	6.063622040420076	7.7645045973168445	4.416920769901318	11.057070569462889	8.298537102153336	8.28119427561239	4.009941398605943	4.6784664348842915	4.646579357547253	2.3982373781237065	1.8186227939137798	4.655758515321726	8.958460828238573	2.3910810233838995	11.072334164410496	11.961433852534581	16.233077392027766	14.137571275454544	9.906563207609382	16.18113511602283	14.367815766443627	12.856569890883826	9.271613585761894	10.168522932241322	25.46804511087821	30.2775740182513	41.144182340584	4.236081096599089
C0_9780	12.406105066086312	14.678860441574374	1.693639306150572	7.226377230913979	2.396559728372229	12.76492554081231	4.430650757658604	17.83339781640461	16.834956617359435	11.748932861072106	15.897486261271503	4.234683675085983	8.535591747735744	2.1619141463609814	0.8685368509110049	5.068162394774405	7.46448586731532	6.364582596330287	5.162163292192685	7.551403232349419	3.112691650757856	7.333334481901206	8.383708428489289	2.4853992639812446	8.204873541947302	4.78691299583374	8.513820814603212	4.587456116274718	5.131722743583553	2.5596924624866966	3.8218335897670412	4.511749503501886	6.199499171267416	11.024354924962463	3.9013253862997357	5.798362729482807	5.473798230730247	15.3962904326991	8.246899208090165	10.313909649007904	15.005825226484367	11.30850217187532	10.979815298704834	7.9169427526284535	4.094351101750943	8.577045486455104	24.663737371186016	16.547164359115648	4.694728518526528
C0_9996	2.695407602446285	4.836759000994655	0.9983269319703525	4.740215224649777	2.7089883261933445	6.944261684376377	2.510304999796629	8.973118323949912	7.24547866398655	5.99361243354015	3.1720207411008077	3.3270441744031234	7.058601969437176	0.9926512209438797	0.7755765845830455	3.0676878259475977	3.4719478263539685	3.1530070404776303	3.5211626215481706	5.047848799523073	2.6385779044435402	2.2821216601377023	6.259040999911131	2.5704085670748418	4.402523608408125	3.7840146315685392	3.8865824955960813	3.263429399949301	2.4933551334944015	3.916778035187108	3.602878517865323	3.1949131717452857	3.3601642320575706	3.517904192424925	2.6548490595085785	1.0731561025192098	3.9028443344472974	7.061509127042348	16.433729465475434	5.197916943846209	3.3189394479544636	5.954997450521716	4.435552597572234	4.100583846249792	3.4629769252468403	2.3784570747063634	11.066161327714099	15.772013015234712	1.68186577241913
C0_10830	3.732036354167902	5.721316158482354	3.329459053215117	9.259334260619134	4.60639322529707	6.701581582746973	3.6530862394548365	8.981891853271545	5.1319540169811	6.183982793894864	4.092287731471863	2.9232668169471063	6.735324833432748	3.7881235794073302	1.926541289883408	2.4544983976784627	2.7603517394218327	3.25822513612997	2.3118786015094077	2.179376100403994	2.0628030294019553	4.5963518808017305	6.563099963198849	3.1225756312638575	6.897591359095821	5.541583389127272	5.120707490090048	3.1937646696664124	2.4570107481027956	3.0582052831565627	3.043535235225132	2.9243596435545145	4.244142359372881	6.180494454832038	2.782669142551435	9.132654299649156	8.148350141412976	6.010773155314999	4.091158910302102	4.4635195092732065	4.820893142222119	5.030198305027852	5.943863832008496	3.038485949220776	5.87686627903413	4.346654615656345	9.329680221642553	4.162749181862924	2.145316441658962
C0_10970	10.976428247671391	6.612349807570222	6.9601614000743055	9.221971546429794	9.02486348501382	7.062299369126007	8.552363574477004	7.946520392269121	6.667174375951288	6.017082753377999	10.07487587635054	5.668938686197641	6.487801009010153	8.600245642971128	4.5887452545315925	5.1215132891410144	5.504062441335589	6.49064556014038	5.214706232455639	4.366752684924051	6.124627437976181	11.878235253041598	9.976916687323826	6.351810260605497	12.609095349658013	5.829562007373341	8.60246906316704	6.706206759583041	5.13401569787351	5.441566228583305	5.341268208793368	6.899914838489059	9.062713783118767	7.711482173784109	7.269733313928889	8.723555218010375	6.023802020902874	8.857692083966802	8.609791802361494	8.640948175365398	8.298760394782125	6.650360684402321	9.468320491016819	5.012678906601302	5.908846664226856	2.9215996593766986	8.267444159539382	4.402055662596136	5.737752630243641
C0_11307	0.18132353124994813	4.174028767214967	1.7305898443051309	2.7768723627369765	2.2232414579940327	4.502601917320406	1.5490250570400412	2.8308693081252665	1.8217408723572281	3.959662247606059	1.7485980291409744	2.0465105906536536	5.6638428372049825	1.6478183948820855	1.38681451103017	3.658772095730988	1.9843736016887115	2.418360877078422	2.040613799698741	1.2356675921403153	1.1732767514458524	0.9505267058698974	1.6713547290728108	1.8353048439961017	2.086568397720736	2.331716340740215	0.9174777495211325	0.755025536024521	1.2613789299100993	1.8197223485914742	0.6136021893031997	1.1585913803164722	1.6878924633541434	2.9357371746902285	0.49830148426421894	3.780852500880738	4.990261854186323	3.0964179909312506	0.2889330369521574	1.3887002728462876	1.7901162848676069	3.3646952706046607	2.281297531347165	3.30384741860626	4.499037815506242	8.65644947513852	7.981829923593214	6.71545594087012	0.9858471835096523
C0_11774	56.89680669987582	121.30025904565048	20.4005344044978	109.53151337204278	31.527134095703403	168.08457501784451	27.79225799939474	207.13250816098108	90.90523035509713	89.6973276309003	99.57648507340718	44.11908975729084	152.36665140684286	22.938009141748562	8.122747519376409	59.34328744904142	32.98475028634178	62.61346120628794	44.35259273940936	56.09903307896375	13.167677859842781	21.94192039045348	64.53444174882243	27.325648896608676	56.75940135503316	56.12639279884794	43.82053755949595	32.799113722096095	24.41087659879422	42.25046015473607	23.482442323854606	9.792132792057705	25.93411428465631	41.74747667096177	17.72970065847408	83.72928655597583	89.40758644235011	154.0815254630219	161.49242820250007	82.53122750139991	80.07345304549403	89.05049731547466	86.84793405619475	72.1626150418285	75.66862834544364	108.64359944243269	292.6944019796604	195.77462148834817	22.463440454523322
C0_11821	25.073029818177524	48.501062453772974	7.918446424961829	36.87466161959586	9.246633991814154	89.98415725425512	13.130095556774178	101.00494285454536	30.330069011174718	30.34190834041532	32.39034157122556	19.516368974995192	41.63151803376241	8.28937099759357	3.806305480600335	44.80917767719311	23.56823679024336	23.916919545034677	27.338168823075026	42.80538998477281	7.590294556763671	16.21192726935836	24.803934648193927	11.72053675656407	23.660737183752122	22.190002693487905	18.429163737894086	27.02798217706383	18.487554554624648	32.057574573164175	12.97400494219947	6.788940130076596	11.199876706783986	19.46804588360997	8.05508365411006	26.071496375456046	27.394468251210867	97.16425137602066	76.69885049727822	45.02483847141282	27.40163473931786	28.90598851744342	38.04186742682985	28.84960057396015	23.23399799827873	93.59061409014545	118.14036849658133	137.99387066135426	16.178715295554394
C0_11978	9.180100638592645	27.52864824306008	4.769593156615385	20.649097864327945	6.067536664219519	41.83662031026573	8.153030440374957	48.418860524323044	28.218177559203724	30.96074747050264	19.37077773028505	13.990975017158298	40.76985184094921	5.940637289294229	2.340117259597837	25.253502304943307	16.083579641597737	15.344168621196953	17.774473754818004	26.633250706501162	3.7841274328646315	6.895217940694952	14.450716298623155	8.806498422552302	13.62541632847908	16.641464786931053	14.48591991468469	20.727284896957514	16.77378099280243	27.813593098221315	9.554788183370205	5.257113047934381	6.223654632849152	10.255309653862673	4.585999780529691	15.870503154729558	19.92078233126493	33.47329458972788	27.39147163631266	17.535475784056473	18.352044934694767	21.137804001347938	20.67556197677427	20.389563446031897	21.62231544618753	69.89093946955033	55.06111093939321	81.85304772156861	9.906959793717581
C0_13577	2.681832391601354	4.457159696760305	2.5348861230878184	2.9452107433108305	2.962680264755773	4.434296778958081	3.151360511536882	5.1461224568633055	3.8403079605065025	4.6164226496447	2.790980113703146	3.101418637123578	6.184297859948802	3.3113997469632444	2.7647525448188084	7.452149166180964	3.6833478207392014	2.428085083619681	3.07514471807333	2.426678982184891	2.8071589256551626	3.6553739304779675	3.613599872550115	2.9475690894753788	2.5287663880812796	3.2732164189869457	3.014876637145309	3.754731330871344	3.8301896771494985	5.299940787103765	3.3950491565588723	2.873440046948812	3.4748641107958447	3.7731062330548792	3.437688624723123	2.7836308478707976	3.5379286976580304	4.585955748719339	4.125978326282661	2.4101246886726204	3.406788878932921	4.102930451940186	3.011071680037943	2.733612024547011	4.5405733548597595	4.173152149531761	6.394240168775026	7.3875344998960255	3.3677109392523956
C0_14053	3.2123202837400506	9.971594507981896	6.581030098904087	9.088132485954008	6.044919712643281	7.679372555583922	6.692233710319305	7.766079959885184	5.589497820471595	7.447791249961926	3.4501360548869124	9.753307917918765	26.859200558127082	6.584082274554044	6.946563124874508	31.463778547036448	27.021014353297662	8.375596203258963	17.214025414409118	7.526442482915781	6.540713350862009	5.815154257349363	7.352227834953806	7.290305277988663	4.501449435898581	5.3693711572715195	5.704433966786635	6.129796238991843	10.04666236512951	8.945446907172514	6.436715760127828	5.098009821193678	7.911450360061688	8.019731238353428	5.642239297569804	8.21221630383693	11.032040367304136	7.611042667938368	2.0057633572570737	5.472623119112608	5.865395280158615	5.67987077007235	5.762829798255172	13.74633094712583	9.740783996652286	20.10695078756664	7.967818805807685	27.43936627942538	11.314580980382482
C0_14138	3.9823948785560943	7.722174739582788	6.3041621665279495	7.36088679727379	5.566116412666181	5.411540990165893	6.578060581950216	6.2620782136524005	4.430264774903682	5.717605448494045	4.021896691555064	7.565668099361417	15.710201820477428	6.530932487040928	5.519940327952806	26.367553241895745	16.571922709070346	6.477087027942191	10.899565041399418	6.090541355053816	6.1483173920274	6.660869411848298	6.727894232881036	6.829987248375114	4.554002810708359	5.537796677103533	5.30418164542422	7.404524324907485	8.447375761621519	13.31655685762259	6.435579815742205	6.176087285046814	7.865090988821283	7.14299294228063	6.15618861992208	6.89977563674587	8.15372241969173	6.23573452987062	2.2241523664215754	4.517888319787389	5.246219273451681	5.601879702220812	4.808877437708047	9.265188495125035	8.30761244097793	11.576412299008325	5.8633491484988145	15.357626119731348	9.031187685640496
C0_14492	6.992066225387192	10.635399975658153	9.431384076452185	9.732647834927707	8.525666025489068	7.764489900442026	10.727215652221341	8.760477136824985	8.264219625310899	9.738022225805036	6.324701032242003	10.363967126845129	17.956114870416965	11.46548776603107	8.726320418702729	27.14448642785314	18.25419903662519	9.89479916036554	14.845020044269146	8.98094890801342	9.705389492111717	10.417442842938764	10.035225919416588	10.629528327297235	8.153192164862244	8.537525059049216	9.437446482858547	11.733186751154543	12.78795120633029	13.70497099418068	10.31215937330027	11.394661315506424	10.937497825847444	10.207088998857062	10.148954321658922	9.509414448773773	10.627004095565628	9.424992466541521	4.595786877375095	7.916233996096512	9.195494794205903	8.456929873220849	8.059575615330964	11.924093526303004	13.239578612220809	16.650063002566633	8.595541448876292	16.887886677708863	13.062412842542559
C0_14902	141.29045826166916	394.6063776659117	243.28904826397718	187.70319760963866	214.02454665845065	263.719184920603	267.57584581788257	139.0954154886836	425.3677314072036	477.4560992811914	186.48161780272258	486.50870451650246	460.78238655176233	295.7242331616077	186.3402469813642	449.7879384143254	474.4801560328841	321.5118547163961	562.1491089412661	527.8812247600773	286.66397037039644	217.69096027710532	227.64397719334485	450.4814962296814	218.64583254917636	574.2563513687611	536.212382076179	598.7084178356781	681.0433224977334	701.0515415896198	890.6352063673584	515.0691968438377	232.27875388547403	214.62468644901776	258.6460710697664	227.10387738085635	453.78271891954495	143.9740705414859	94.84036413264971	225.40730773307493	376.12594334523567	461.5450864646837	378.93509389003987	497.9946998137248	529.966357908996	265.74706723587934	177.32853732310988	290.7768209448704	463.4839043390939
C0_14949	274.9294335778132	401.9280129137286	518.8528803657325	420.42702628509966	607.3900503046497	343.5138830760963	458.0241832816643	231.36431224741503	297.2962503541827	359.3839702635289	282.7111066980089	453.96805692192356	337.42804565194535	462.7845407143381	376.36330282328663	467.19272750490575	499.8803871377586	390.7070598462028	560.0278750528727	594.6164041190073	404.1415196976305	416.4411172210915	369.8613263247007	461.7281019876122	346.5039051440717	448.5632187105336	525.7116111624206	631.5548817151744	709.6700457318971	701.7608877433371	792.5893625607208	602.1226465506651	479.39116627303787	424.57543258722984	598.3767981940372	465.57384241580127	458.1939541400004	279.31304149855146	180.42515797261245	389.26384855413113	350.84911763512497	392.730939508118	340.35016409572205	420.7933072231019	422.8894967633456	194.90777713662004	248.72267225665834	289.5699336172401	505.5312992967507
C0_15054	242.02424743582765	309.9312397266156	366.9612722658769	300.11581837041945	298.7156103484849	264.766787571345	372.2153336709858	241.4495079334643	349.51562691518325	397.92511215362714	259.2622965181327	378.5489015359779	334.81154921998217	397.34585510261365	332.77160078185517	357.4341413499259	402.7557962226376	347.8794713014779	425.1771720375225	365.9976332149538	353.96813703984157	363.88097850772056	376.7258002396848	424.2811367834595	342.63826787879674	366.11306796528805	403.4470590823458	422.3841981537579	440.566706031277	428.5979851783521	453.8725502196468	464.2680081838442	375.2085536454461	357.50086719169605	370.5370640292857	297.9620124070775	334.83454666002393	227.51219075659418	157.13616753520432	300.8126141072312	382.57563402910256	351.6511215584018	371.56278404333085	329.54501792744225	417.5852307775919	509.56316626154995	240.49158144734542	295.59541769590857	402.6996733179934
C0_15090	213.99027159381504	305.0934704846085	334.142504341401	252.78082697284344	245.75243952627991	272.9164203075755	372.6326625983679	241.66119183791503	351.58739777968657	384.67676073098295	244.64335817407772	382.23305431929003	351.15497310420176	389.18395901865875	326.35510694929894	388.50084023651937	446.136200195936	345.46119366345715	463.8275659918946	423.11294600450054	368.9021912568188	355.569161996821	357.9139585350367	435.909920890574	317.8604448014399	355.30390659631576	417.09536193720083	466.55149266000296	500.32324862156645	508.0733061623455	485.9197866484563	462.7183978899227	341.9810090318573	333.44015723707486	342.0625006877132	260.06004777818424	328.5001918916143	215.69371638142	150.32195122572082	299.7825102319648	358.36088564661884	337.95318269633106	357.62778581912056	342.0867369457591	412.0160579314376	457.2748939758007	230.22522065291284	313.0399100593086	432.6474503466429
C0_15258	118.85970225802377	142.77100701432812	185.03389661149097	210.4944431877058	151.84120500263325	135.16262276934862	185.5993793513067	125.15196195898837	148.18772398337435	156.41057107821487	127.63154792001167	165.85097221535005	136.28204437366773	194.37124318348816	230.96956127337182	167.83224265017498	186.41535385121	171.27289345826097	183.0329567102952	168.91953396179758	195.1676937931515	202.07170452908886	189.12981438889383	189.61198051484558	167.18066110543643	156.0575880115663	173.5548690681004	194.90204440424674	178.80454518330438	178.7956836966672	175.67659119881483	208.55264554216328	255.3368702651289	242.6575274489425	291.78548922324904	213.32383662656528	148.49772572148603	124.99235261561546	75.17584550813916	146.79593269577913	174.98790833215645	147.63721278896668	167.1537474150427	142.69789980526852	178.19567235915972	295.8634931523304	115.15873563165177	155.84874350478185	193.54427197753603
C0_15550	70.33491449594558	87.22161179537312	109.13627610618143	91.42171757655478	105.59237875133262	77.1541280591187	106.58116289808581	72.0968518934203	78.49615096583028	80.84191173538416	79.65516134380563	96.5428685941815	77.55016958965633	109.74978822048135	103.53944566932803	93.15292948479352	98.80554014794433	100.75007040204514	99.65688931974883	97.76792932187459	112.08726756066345	109.97591241334015	95.29270357254688	100.73282947376349	90.1419772233827	90.23924224367867	91.75833421176742	101.08826494124644	92.86564757966428	89.82805512285091	100.3348837842834	106.60652258197125	108.5794575027935	103.01850268760325	111.59817191696465	94.51468316277602	90.30628838463643	81.40686160705229	49.94906977627959	90.64764964406187	89.39350488590311	85.31231798191203	84.58141775270353	86.81757083824651	94.39749552994863	79.8044957337336	64.63043086135168	60.00732999400676	106.99854863558235
C0_15802	465.14216357879644	525.0853051837836	737.9427777297228	858.6415650053614	965.4712985581303	541.3702755647724	552.8732613639071	553.3799810861732	296.979877957697	347.6858076365448	625.1558481185483	464.43952151348617	429.0402920936379	541.5941177179326	705.375141005574	250.18133512380433	294.9249791976981	529.0636972940041	389.57907858996873	264.48683244098794	459.05238118495674	477.5467494925198	621.6663639234961	430.87139385595344	701.5889496156046	579.4973265269393	449.7026094443721	233.943401788406	203.09881577451188	214.24214165092678	375.2236247851831	372.9712364065923	643.3311743449126	568.2441926638008	556.2202130428118	842.5460711245399	737.3144138392704	588.1610367218693	509.5122770587934	631.0785364700466	495.84467074997974	494.5377758531859	573.3204836610131	417.73706665937766	457.9379257752252	269.4978216326538	635.1299592039345	214.53091693574646	291.1460762197856
C0_15832	418.08860791157093	448.13401557208226	599.9277826919797	682.8943917000565	672.610176028534	516.4330267596262	525.9409016352254	562.370692367571	246.28574370931216	276.3368848977153	503.7571786739601	421.290612241685	360.9923867159754	481.62737175664006	657.1926128879119	272.03819679387516	313.0357493871731	471.9811536060481	376.61290873371104	286.9580016430123	479.24710082827664	490.92035024348183	581.473735591466	410.09136469713513	592.0843717154008	460.51724179438554	407.8553949350807	252.6413973224806	230.63663638192023	235.0997331705326	328.3043236044433	382.84449216533227	565.814366348951	513.012018781165	517.1268180853158	660.7057666024374	547.4458981715243	577.3725404018783	465.6146209483559	590.8258788740129	391.2510051614475	380.3767760972397	429.35796105871304	384.18277223871524	395.800045749433	276.3459002119471	532.7396535075608	221.0883733185722	311.31371604540857
C0_16010	188.56166118979425	237.8050532863313	278.6961167937967	304.526183507736	315.9996199641078	244.30342994141506	257.97143429603176	248.15268860069804	168.7763942443188	184.72014662328735	251.62857360272176	243.0150784021177	205.73804709600662	250.78237790675686	304.9373649515186	203.76599245419374	220.89800752681583	257.1328684390587	224.43034356302798	187.06257343602883	249.64201061872285	230.18926014006288	268.6035701543279	228.71689884087246	279.2556108448012	248.3151576910607	205.3232962468767	168.82706277145374	164.27280325525763	153.60813800223414	178.933352185825	193.02865884882615	260.3715749993389	250.7544358711445	240.52460779847283	304.2644864259323	269.6793841538351	256.03714320516576	193.9843089164041	269.4665481667507	215.27768595693072	216.04837680129768	228.51236554465495	221.89061258685473	224.9502793651787	217.16510967734493	243.9495230296628	157.89414079380683	214.06830989244875
C0_16440	48.06617175791928	73.1484728321002	77.6634959480492	79.28662649956922	80.75788454640661	70.06777575808582	73.73537922119365	72.0679876877456	53.25087400829642	54.67790184859306	74.30988613587132	74.50080899648148	57.81840461104793	76.29597549825712	90.48256460453659	72.09185123393138	67.97275217598393	83.39083590627924	61.59762318287925	58.46122336772754	80.20401725194384	72.4235940545383	76.23089208193201	68.67749408828765	77.53029072514266	68.35679280145133	55.27521350699885	43.68830063355015	39.17788655681786	38.27535034403854	41.481022652745054	52.40551264832932	74.67492981185194	79.60706835015365	69.58478295659842	83.50943376219473	71.69457468555885	74.45268926795592	48.75731366373126	77.37434744092899	65.23502496608425	65.131651442986	61.55224695041449	70.26795382388151	64.20159196727042	57.46050535292072	66.34026032387631	46.725186595303164	75.80014457557748
C0_19103	0.490987923076063	0.47109237945746746	0.30403588930820336	0.3501516048392109	0.1409872609425433	0.5317594304335452	0.07309401281714507	0.2895362877756815	0.34278709448809513	0.2989626013708586	0.3227266214544964	0.4452555293064224	0.9008146265179325	0.24544093394966646	0.3736841067200675	0.9667805876254992	0.9935166550270121	0.23181358678823794	0.9512307566563623	0.5333552120281136	0.24629873690360568	0.2698894138127459	0.37823779572883437	0.31656034474555744	0.10259040159671493	0.3996614541910083	0.39336297150150407	0.25050059026579424	0.6386386471657025	0.5625152702937533	0.09186229147226313	0.1433858452570232	0.3347260714458977	0.2728199606163788	0.18627443924699374	0.037382229258812134	0.7236787422228196	0.2720506543048669	0.4006786088979899	0.25113542097607383	0.307234124983257	0.33244141965612123	0.35708913862686614	0.6102637103882567	0.5103385409038859	0.8833797269975318	0.5615204068513269	1.7901688328133123	0.5557716818083513
C0_20924	13.548866579752655	7.231335390926253	3.024508409229339	5.358541140934274	3.167308604734491	6.0479740300307	3.1154712102358464	8.170476007022572	9.320933230746249	8.86881676665817	7.115289736555803	4.718129784263127	5.822673416029775	2.7539479015185013	2.156926722600188	3.216741435762193	3.5137700957158433	4.3886984890891005	2.3992019868807453	5.5487016607220205	9.704899910763437	3.7298880199079814	10.622322546977905	12.852206841439585	5.801237206730769	2.388263501436228	7.81889651099909	10.080064057921463	11.795595016673783	23.656724211514124	8.652240321004742		4.163507215066318	4.273637822528275	2.6434967773884015	4.532843127767475	6.573231652727223	6.330355898558465	16.49332989281903	2.9565012692566706	5.20778265978608	7.765905075130389	7.520554398268214	6.349377457687384	9.689835854215232	6.24563174453435	9.67944783016889	4.399913013123417	2.100440720583024
C0_21845	17.359291572629544	6.13118620405392	5.853583559474205	5.136949137751608	4.402129645322033	4.492239656028417	4.627367647436746	6.776056338807488	9.297397400426894	9.151316568823896	9.072322967825272	4.8012266940059645	6.900173297039344	3.432045457647058	3.2581630942362563	5.905900767990806	5.318281649960229	3.285253028082142	1.5452380246206934	4.71350520478969	10.028727183028565	3.2357923209544404	8.857674188346955	6.4787144885047345	4.736986527713969	1.971568109448213	5.5754970824964944	6.886281936795872	7.094174663901728	14.025044082430922	3.766175088972466		7.246231543645747	7.286173696160247	4.3529215297988975	4.309310242589802	4.314003721665553	6.605205680468067	27.742047639367865	4.517681214145325	6.35622669447936	8.424025003651769	7.532589895452682	5.1804202768623115	5.038299462240475	4.348612427515488	8.630692605523732	3.9403808568227436	4.106994347736082
C0_22899	11.940280559103575	6.683891694563773	7.585536261460481	8.788897072969345	6.860971042252438	5.6670816509074555	7.909395274076652	7.141352332325345	7.479186651249555	9.179647377437247	8.966328737481556	6.301837063701413	3.9617909789947707	7.250401664435847	5.8118040348785875	5.709853775685259	4.842894389010314	4.052857755725607	4.316780418821264	6.467387226888067	8.35122156546226	5.130871146431643	9.99533771818359	4.242638617069273	9.357294003940163	4.065496950749336	7.240757611641031	7.877759900722137	4.805904233823302	6.775741379801441	5.565122474491741		7.124118572209406	6.817396029119128	7.10079035318354	5.94094884432256	5.902850666242625	8.61887090320345	13.79091208923954	5.206812108875558	8.733939874904008	9.093379967727884	8.462835702988603	5.678871967860961	6.577541489159878	1.3160042568547445	5.995701315108823	0.616104163793791	6.064163231668099
C0_23712	12.448175206233012	13.77937179343831	10.46092416907303	12.725953166897105	11.311332318688072	13.400862102975315	10.285510200927572	12.705364865513474	16.926655259176307	17.528965614317308	12.508843516765564	9.521795040669968	8.916952036018632	8.159966617901924	7.375594146664436	9.249830127898761	5.774998460332432	5.700340143675026	3.6978491241796725	9.178625395666062	16.015690373282556	5.76967112709007	12.225835916324003	6.486036274645057	11.711619061525033	4.5191269593616585	9.622695283614132	11.488886665247222	5.442639744360581	20.550758366350873	7.2894008326963045		13.068129979198646	12.783991015577824	9.619615595933869	12.058779594134242	13.519370792148578	15.231186589550507	13.82964235181409	10.518851288345852	13.152405301680085	14.706287205492428	12.050367067049551	9.858709587640098	10.628041325102073	8.388777128674544	14.020368741889317	5.891591255468763	7.398399843397175
C0_24391	10.808352193793224	13.311494557978348	7.673579800431797	14.31790899548227	9.488471188396975	17.602013831851604	8.357259202861025	17.222504065119423	12.379549537384595	13.55098761327016	15.890827959198903	7.91000374335253	11.035925222779053	6.333500946623312	5.143096590890379	8.81585640450375	5.665046775615033	3.1854272775859096	0.8647983234824606	7.778614387152079	18.79083822536252	2.3589548988669096	10.230183564570744	3.5007894031985356	11.67412559895654	1.9329424521588863	7.471715956480124	7.984262457129882	3.4132813565238207	11.482555320001094	3.0847843406270186		10.47119340141945	10.812126928390638	6.425935887424625	12.623534952892014	13.878945640182454	20.759483881651963	15.946007051940363	11.26991043313442	14.322441057442584	13.033868738559146	12.481949421599834	8.56566885154856	9.85014507004588	8.5826437837999	22.466939739947925	8.213408792259845	6.524544148980677
C0_26737	4.182546405752402	6.532438271456533	6.220821175450662	10.141054530553534	6.328601939436779	8.664004555626361	7.349126548963763	13.94109409911586	7.4836039927859765	13.518184846070273	8.486819526742545	8.528955361540786	13.806944244100555	6.482658220435319	6.8786739475339616	15.417867178748072	11.949611714570457	7.449027560005211	4.972849254194549	10.190579081352144	16.443799919903277	7.617422781943305	11.33526027328223	10.99554789035429	8.87083642898484	4.639426834159339	8.556789752800917	11.898000929646997	10.244410152808065	31.96712936029136	6.921582095383968		7.265230672508072	7.428025774485298	5.172170373473174	12.571638254383657	9.617330288735916	11.767722138314918	9.235072244903359	4.555083142501278	10.255500737841151	11.02909572962202	11.388611485643871	9.83197436424678	11.717844323384814	18.856799302161303	15.603815681814796	17.969288116703062	8.49165065299027
C0_27964	6.3836221709633465	69.82210347070144	21.085997112352516	46.352460790632485	18.47402861575566	70.0936403698441	19.322956862409065	64.22302911669101	27.77675703058699	37.08459576416117	22.32668912812217	44.8753123317635	210.18497429885485	18.711018322697694	25.014077134836043	156.2691726966798	172.4895720761574	45.28035488309383	23.524171599422765	50.27290072514198	83.81270068575262	34.30158612770584	20.572581374604145	46.687421920836066	22.352900035406943	20.14318927309332	27.448946082744293	23.196414026034528	59.922633220472974	70.2988445762686	20.265446119482664		27.919355511087648	38.739846021395344	14.355947670421623	39.8754965233395	50.77987218933185	49.17233886960165	13.35074961242427	22.324623001369947	22.41925555939969	30.389186145189544	30.216010827982927	80.9889450891711	58.45955883643655	198.10898219589853	88.9372833620427	278.2982786463184	56.99965751386638
C0_28161	6.391583289477519	39.179280632082865	15.610744294392708	27.45764365919902	14.382314830493517	37.372363381513544	15.91635094203083	37.02729829552224	18.862882700491248	24.01343571755464	16.61644602881592	27.77740635890059	103.27557002691704	14.945868784113337	18.312240919995567	84.6885435563402	91.55972322069145	28.20368577826909	16.073124492383997	29.882702862594904	47.33152539410871	21.381143568011723	17.62703346328452	30.807979845643196	16.481237084780876	15.764923562582496	19.752382884041673	19.169110931946204	34.82311092050215	43.668778998325436	16.084520043260998		19.328323604062557	25.01766891021045	12.061760918686646	24.544084441135116	30.29257927819981	30.864964207798817	9.564130118877312	15.31336943834631	17.094287343817726	21.03526891398442	20.063582815109612	45.4128302715915	35.01550743102494	94.72286087858532	48.699928627552765	141.93731280844187	35.64549981992115
[truncated: 35 more rows]
[truncated: 138 more columns]
