# Supplementary material for: Serum Proteome Analysis for Profiling Predictive Protein Markers Associated with the Severity of Skin Lesions Induced by Ionizing Radiation
Source: Proteomes. 2013 Jul 10;1(2):40–69. doi: 10.3390/proteomes1020040 (PMC5302747; doi:10.3390/proteomes1020040)
Supplement: Supplementary File 2 [file proteomes-01-00040-s002.xls]

## Sheet: Feuil1
Supplemental Table S2. 2D-DIGE spot data (Cy3/Cy2 or Cy5/Cy2 ratios)
	day 3
	CTRL day 3																20 Gy day 3																40 Gy day 3																80 Gy day 3
	Experimental series 1							Experimental series 1									Experimental series 1							Experimental series 2									Experimental series 1									Experimental series 2							Experimental series 1
Spot Nb	1	2	3	4	5	6	7	8	9	10	11	12	13	14	15	16	17	18	19	20	21	22	23	24	25	26	27	28	29	30	31	32	33	34	35	36	37	38	39	40	41	42	43	44	45	46	47	48	49
32	0.578447	0.797361	0.914973	1.03059	1.32243	1.22469	1.04569	0.532038	0.753219	0.92241	0.819551	1.33112	1.21954	0.760862	0.752265	0.657538	0.812855	0.682176	0.877143	1.35463	1.31791	1.24755	1.05472	0.793301	0.953988	0.861255	1.3419	0.754565	1.28321	0.8577	1.00586	0.611476	0.766966	0.751707	0.895713	1.06591	0.876965	1.44669	1.74841	0.852133	1.5431	1.24836	1.10436	0.829842	1.12106	1.12997	0.736879	0.881106	0.856488
34	0.857146	1.00275	0.778017	0.590324	0.660759	0.807498	0.598603	0.58752	0.53409	0.603191	0.618408	1.17749	0.682084	0.702082	0.959773	0.715842	0.728022	0.621747	0.480573	0.815386	0.797719	1.44073	0.87996	0.713179	0.717626	0.707463	0.875125	0.827193	1.40008	0.658719	1.16522	0.740817	0.50916	0.62456	0.653421	0.94566	0.702407	0.495175	0.670239	1.27558	1.61133	1.29722	0.844944	0.919205	0.868912	0.947339	0.940087	0.898853	1.06536
35	0.83922	1.06199	0.810452	0.641181	0.746146	0.844639	0.716446	0.561065	0.526519	0.575114	0.641309	1.21156	0.801426	0.665877	1.02335	0.933258	0.722378	0.617374	0.51601	0.88892	0.880447	1.31117	0.765236	0.656163	0.710431	0.728081	0.941356	0.792451	1.28716	0.60607	1.12259	0.960013	0.534349	0.623636	0.690816	0.764769	0.724764	0.506154	0.664767	1.34525	1.53323	1.21818	0.861191	0.815785	0.994969	0.993242	0.860008	0.862862	0.866987
36	0.842873	1.14597	0.821161	0.731554	0.874445	0.908081	0.822634	0.543392	0.531828	0.573246	0.667391	1.2899	0.876078	0.746409	0.98404	0.962055	0.736485	0.603345	0.591873	1.01084	0.98741	1.22641	0.824597	0.6025	0.76325	0.733567	0.983305	0.762232	1.1306	0.628302	0.826715	0.991725	0.548717	0.700223	0.733163	0.746884	0.742261	0.558646	0.719876	1.30665	1.34998	1.23262	0.895062	0.734357	1.07117	1.03711	0.796057	0.865263	0.87662
37	0.64169	1.34454	0.882612	0.872267	1.06319	1.10637	1.02304	0.550705	0.562455	0.740012	0.775022	0.889559	1.07929	0.756315	0.877938	0.81138	0.768119	0.526246	0.767952	1.21706	1.07035	1.35811	1.12687	0.626925	0.850879	0.802119	1.15159	0.778751	1.30864	0.733091	0.823099	0.786299	0.680947	0.748085	0.802814	0.84483	0.846464	1.51276	1.71806	1.03303	1.58423	1.26954	0.996232	0.755131	1.11096	1.07758	0.812613	0.850787	0.847547
39	0.590451	1.15912	0.883985	1.01449	1.22403	1.16269	1.07594	0.509023	0.58353	0.797256	0.79895	0.918906	1.10445	0.74359	0.994216	0.631631	0.779785	0.722143	0.923965	1.3984	1.20865	1.32673	1.21719	0.779752	0.886057	0.792233	1.25847	0.777592	1.10935	0.766438	0.818112	0.602885	0.674838	0.725047	0.857506	0.948157	0.835713	1.67886	2.02797	0.977455	1.57794	1.29649	1.05026	0.779033	1.00564	1.11408	0.783703	0.921713	0.829246
41	0.695782	0.833082	0.963776	1.10445	1.20601	1.2694	0.842471	0.570789	0.792137	1.0012	0.941993	1.19078	1.12141	0.810358	0.562733	0.631734	0.856412	0.891941	1.10103	1.43721	1.37597	1.67548	1.71081	0.899089	0.983321	0.889523	1.51636	0.807399	1.4826	1.00513	1.10254	0.58556	0.834645	1.00446	0.953318	1.21381	0.891206	1.21298	1.52842	0.973637	1.93355	1.22066	1.15732	0.842666	1.12623	1.15228	0.67499	0.876884	0.923362
42	0.812402	1.00882	0.979762	1.05736	1.13216	1.19466	0.852085	0.906467	0.821917	1.05963	0.977045	0.758025	0.967422	0.851143	0.526458	0.69561	0.997881	0.541642	0.738343	1.23021	1.20015	1.76326	0.936727	1.16769	0.86617	0.997648	1.51098	0.822446	1.31691	0.880825	1.12756	0.587949	0.910596	0.989785	0.958252	1.24265	0.934545	1.17087	1.50515	0.990939	1.98476	1.2535	1.04702	0.908681	0.967968	1.08446	0.683447	0.886528	0.884916
43	1.02256	0.940018	0.812118	0.592764	0.676572	0.79019	0.502804	0.555371	0.52996	0.624149	0.666856	1.11376	0.612517	0.627356	0.964268	0.808167	0.760575	0.590156	0.546134	0.834354	0.707476	1.25419	0.878003	0.710541	0.734479	0.684966	0.860281	0.851209	1.3237	0.664914	1.1003	0.851049	0.494151	0.628351	0.634549	1.18945	0.713518	0.516477	0.693227	1.3652	1.31606	1.30688	0.808603	0.755383	0.890626	0.905039	0.82917	1.01914	1.0333
44	0.785846	1.24855	0.833787	0.805386	0.979332	0.999846	0.819775	0.534128	0.519599	0.647094	0.67314	1.1647	0.99352	0.768361	0.946251	0.912381	0.732597	0.621749	0.637272	1.14693	0.958236	1.36552	0.893148	0.638603	0.825803	0.781587	1.05854	0.781774	1.29195	0.676233	0.770976	0.886782	0.533541	0.671684	0.75927	0.797875	0.771968	0.632078	0.796346	1.19665	1.38036	1.25299	0.962258	0.734814	0.989712	1.08379	0.790389	0.866095	0.864348
45	1.08081	0.888508	0.860739	0.652835	0.783465	0.928094	0.988678	0.665493	0.594788	0.848928	0.719762	1.05776	0.595465	0.65947	1.14426	1.11902	0.803109	0.830485	0.781945	0.980222	0.631615	1.38343	1.2899	0.93267	0.757429	0.700525	0.844287	0.82433	1.28724	0.774248	1.2348	1.17614	0.51357	0.743479	0.638281	1.08601	0.885302	0.547182	0.810709	1.50857	1.36431	1.21274	0.820479	1.59624	0.790568	0.871166	0.779571	1.27766	1.42841
47	0.911226	0.847671	1.08963	0.946351	1.06991	1.03684	0.920873	0.927889	0.864746	1.02691	0.819925	0.872085	0.761531	1.02373	0.497622	0.787978	1.07937	0.577819	0.680236	1.21245	0.93	2.0351	0.529646	1.39729	0.675327	1.0915	1.2423	0.79866	1.07007	0.63639	1.27457	0.632874	0.91747	0.860615	0.947357	1.27979	0.916774	1.58884	2.1116	1.16003	2.04634	1.25357	0.9812	0.919697	0.961485	1.22342	0.807216	1.08927	0.93317
48	1.16983	1.09343	1.11659	0.893879	0.931956	1.07368	0.74429	0.985977	0.776507	0.877441	1.09049	0.78451	1.15994	1.23251	0.496373	0.815188	1.11598	0.45819	0.670201	1.16389	0.551157	1.8081	0.178757	1.2199	0.801689	1.03914	1.30452	0.928358	1.14112	0.558198	1.74593	0.648237	0.896837	0.849113	0.8563	1.16258	0.837894	1.79541	2.22721	1.00551	1.89492	1.17765	0.833681	0.945296	0.931818	0.758523	0.742307	1.04407	1.00112
49	0.728825	0.908655	1.08337	1.01967	0.962835	0.942746	0.751567	1.04137	0.817575	0.733339	1.0147	0.780157	1.23823	1.0727	0.547039	0.844224	1.07015	0.539761	0.480679	1.16752	0.588323	1.45222	0.934427	1.70058	0.836172	0.878403	1.29359	0.919923	0.898316	0.540879	0.323761	0.660875	0.938525	1.01721	1.04441	0.8494	0.812998	1.53454	1.91537	0.762152	1.47647	0.984677	0.881396	0.916949	0.893254	0.444048	0.738911	1.22299	1.15459
54	1.52538	1.15388	1.42635	1.43769	1.73669	1.30742	1.26126	1.25145	1.03578	1.72756	1.37886	3.40094	1.15181	1.37856	0.913959	1.59717	1.80884	1.60406	1.71523	1.43359	1.37021	2.47019	1.56087	0.965701	0.905969	0.90832	1.38543	1.13558	1.40753	1.39333	0.861287	1.54781	1.54763	2.28978	1.34881	1.52283	1.41316	0.938141	1.13394	1.03136	2.75531	1.134	0.792795	1.34479	2.31622	0.715177	0.706491	0.9173	1.01605
57	1.72687	1.16606	1.08661	1.30619	1.34565	1.33747	1.14968	1.67566	1.18497	1.141	1.27555	3.20706	0.952483	2.32397	1.42702	2.82303	2.04701	2.17054	1.1329	1.19049	1.28493	1.58899	1.64661	1.29453	0.651977	1.08882	1.15922	1.10116	1.40838	1.06497	0.864327	2.62523	1.4573	1.6919	1.20567	1.0014	1.08423	1.03069	1.28272	1.53225	1.49751	0.957113	1.22905	0.953336	1.69014	1.44687	1.42031	1.69797	1.23913
61	1.72331	1.25887	1.30954	1.30272	1.40855	1.24442	1.1064	1.45114	1.21472	1.31266	1.20148	2.03366	1.01563	1.84992	1.59865	2.16184	1.62046	2.03806	1.1922	1.21597	1.24265	1.30626	1.74653	0.878232	0.970947	1.09342	1.12475	1.25867	1.33077	1.01695	0.960575	2.18973	1.44364	1.24525	1.28684	1.33839	1.07856	0.84602	1.03336	1.62493	1.0511	0.978634	1.26904	1.09531	1.36289	1.21247	1.19507	1.50941	1.49358
63	1.54169	1.36301	1.29536	1.33872	1.48842	1.34565	1.27598	1.28026	1.26259	1.46819	1.27858	1.89012	1.08972	1.83473	1.66443	1.80292	1.71385	1.56291	1.18765	1.21588	1.11104	1.3359	2.05097	0.944098	0.946688	1.09563	1.329	1.0918	1.30414	1.01796	0.990289	1.8646	1.45042	0.921777	1.32355	1.41133	1.11293	1.08893	1.39179	1.65826	1.05994	1.02822	1.19271	1.28617	1.45915	1.15531	0.872778	1.16247	1.24651
66	0.837282	0.517538	0.88926	0.871672	1.08558	0.959207	1.03332	0.904191	0.927221	0.805799	1.1413	0.756207	0.946228	0.684494	1.19189	1.14337	1.10346	0.977577	0.572544	0.980572	0.985444	1.19687	1.09808	1.03019	0.83863	0.693641	1.00023	0.881747	0.804246	0.539803	0.663513	1.10572	0.851658	1.35207	0.983051	1.07219	1.18074	0.798005	0.951132	1.01079	0.97242	1.03714	0.955487	1.02036	1.02186	1.09913	0.82379	0.932721	0.904066
67	0.661418	0.620518	0.844865	1.01602	1.16379	0.923184	0.958527	0.775799	0.988044	0.88636	1.6715	0.791397	0.810955	0.70162	1.14659	1.02317	1.19819	1.2698	0.635437	0.979306	0.923715	0.879436	1.17171	1.00913	0.922488	0.776142	1.02504	0.819554	0.822518	0.592911	0.780053	0.963646	0.832768	1.18391	0.969746	1.33664	1.26509	0.785	0.956438	1.04426	1.12797	1.09239	0.896189	1.09852	0.955213	1.06219	0.870679	0.938562	0.982763
68	0.642511	0.723496	0.754078	0.773752	0.880062	0.915152	0.910127	0.703931	0.940417	0.883037	1.27248	0.766128	0.817042	0.617404	1.14528	1.00297	1.21677	1.28394	0.825404	1.05433	0.880035	0.910563	1.19663	1.02158	1.11962	0.820214	1.11792	0.820953	0.957621	0.588039	0.896812	0.960323	0.729269	1.02631	1.35092	1.25271	1.14704	0.780923	0.974204	0.896508	0.711537	1.13709	1.01402	0.972994	1.10553	0.977748	0.958171	0.984787	1.00995
71	0.980613	1.1821	0.944924	0.923262	1.24762	1.09306	1.09794	0.862412	1.12742	0.907668	1.28528	1.21399	1.00853	0.682315	1.38569	1.60619	1.08309	0.738025	0.737522	1.04576	1.10336	1.20975	0.929258	0.790005	0.891844	0.692675	1.27485	0.73984	0.901166	0.597815	0.67746	1.61612	1.00806	1.20109	0.964553	1.03551	1.00071	0.783596	0.930281	1.04127	0.972047	1.14637	0.96701	1.12894	0.813536	0.941816	0.729247	0.967222	0.930925
74	0.830803	0.7693	0.893618	0.749913	1.17667	0.953007	1.00013	0.80902	0.964237	0.865455	0.933849	1.19679	0.951969	0.673708	0.75935	6.15295	1.13005	0.926446	0.784626	0.930601	1.25472	1.13056	0.655309	0.943958	0.781158	0.734421	1.11124	0.751653	1.00894	0.652234	0.655618	6.51608	1.00792	1.12658	0.85931	0.965704	0.909611	0.702889	0.8051	1.00837	0.862849	1.20398	0.962798	1.03362	0.690547	0.934433	0.696724	0.830777	0.934294
76	0.636974	0.732445	0.839059	0.676953	0.589815	0.959062	0.757531	0.720589	0.906381	1.00406	0.926812	0.551893	0.778922	0.66344	1.26831	0.981616	1.19129	1.83376	1.01323	1.04052	0.865672	0.421986	1.48859	1.31342	1.17112	0.902154	1.03141	0.828846	1.16049	0.692024	0.93799	0.980266	0.831029	1.09292	0.905768	1.3308	1.04239	0.957122	1.08376	0.555137	0.592309	1.26213	0.928153	1.03646	0.959939	0.833173	0.750301	0.962681	0.961602
86	1.30328	1.36667	1.23714	1.35125	1.68169	1.37551	1.32486	1.01979	1.25149	1.51032	1.49723	1.67997	1.25602	0.98013	1.58304	1.4145	1.53252	1.12941	1.36377	1.13929	1.43571	1.46967	1.0683	0.919126	1.13961	0.939131	1.38569	1.03274	1.26404	0.918783	1.26185	1.34807	1.37424	1.09273	1.22768	1.54036	1.19846	1.32212	1.28349	1.36247	1.29627	0.946441	1.17396	1.34493	1.17119	0.896122	0.588358	1.30743	1.22742
87	1.31655	1.29656	1.18936	1.31184	1.50495	1.24046	1.24389	1.1398	1.23235	1.37105	1.3749	1.60411	1.16828	1.07387	1.62487	1.53399	1.41193	1.22292	1.23859	1.05924	1.31028	1.34585	1.07036	0.93472	1.0603	0.999517	1.23733	1.07203	1.23826	1.00729	1.27311	1.4442	1.37045	1.19628	1.21873	1.45108	1.07049	1.18998	1.25619	1.37173	1.27858	0.904302	1.27297	1.26777	1.21144	1.04129	0.738867	1.43888	1.20038
88	1.35682	1.02223	1.15365	1.04063	0.586297	1.18245	1.11259	1.28771	1.11884	1.23705	1.12089	1.27331	0.89415	0.944909	2.04337	1.12731	1.17522	1.11994	0.730718	0.982064	0.869465	1.15823	1.1753	1.04441	1.5262	1.04213	1.05056	0.965143	0.883155	0.866065	1.14214	1.01177	1.00527	1.054	0.97241	1.09911	1.93137	2.01396	1.38315	1.27656	0.78922	0.945725	0.689296	1.12661	2.05788	0.857481	1.1328	1.2484	1.08813
89	1.6343	1.185	1.12632	1.33286	1.74332	1.38641	1.36766	1.17168	1.0279	1.20885	0.981041	1.14118	1.67432	0.804328	1.50686	1.40348	1.38772	1.30382	1.5403	0.875237	2.24377	1.40873	1.21476	0.929564	0.955918	1.06369	1.0405	1.05912	1.45415	0.974951	1.2119	1.48423	1.29926	0.615573	1.17935	1.32567	0.671683	1.18037	1.319	1.60947	1.26923	1.04958	1.33439	1.31296	1.14813	0.982567	0.617184	1.50258	1.13057
92	1.60632	0.594988	0.833363	1.35786	2.20239	1.69381	1.48349	0.86108	0.682444	0.738826	0.487224	0.47689	2.14234	0.580112	1.80975	1.87785	0.785646	1.32024	1.71239	0.645048	3.7703	1.58196	1.2681	0.978534	0.596342	0.760669	0.788192	1.10893	2.29768	0.84299	1.505	1.92377	0.965741	0.636458	0.838592	0.849073	0.326504	2.04879	2.17497	1.76138	1.29261	1.91304	1.25926	1.49522	0.780872	0.518018	0.437001	1.88288	0.826128
93	1.69313	0.812903	1.01241	1.32462	1.95756	1.56233	1.37238	1.10404	0.93249	1.00459	0.765689	0.830763	2.0164	0.584881	1.50437	1.94525	1.18827	1.33675	1.9717	0.700442	2.98123	1.37441	1.22835	0.958083	0.743894	1.02413	0.915406	1.10759	1.64956	0.830315	1.36073	1.92389	1.07992	0.5696	1.04504	1.10959	0.55915	1.50307	1.54648	1.67066	1.31408	1.29153	1.29795	1.38888	0.906825	0.804538	0.563309	1.53122	1.03789
99	1.46274	1.20103	1.25282	1.23141	1.79735	1.47467	1.39988	0.964389	1.16331	1.61834	1.5243	1.43541	2.06975	0.861572	1.39095	1.13729	1.2699	1.41436	1.48503	1.02745	2.94603	1.37298	1.16494	0.953502	1.01283	0.841314	1.39035	0.954312	1.33415	0.955815	1.13989	1.19591	1.42126	1.0009	1.0814	1.69827	1.30444	1.28378	1.27514	1.58713	1.12264	1.60274	0.939661	1.21689	1.07914	0.825612	0.621726	1.27807	1.2887
105	1.46072	0.694439	0.760918	1.44189	2.70982	2.41148	1.25031	0.554471	0.533532	0.435248	0.548072	0.596928	2.5017	0.664568	2.06705	0.81755	0.701843	1.19395	1.73024	0.654439	4.02482	1.3084	1.55655	1.03217	0.435372	0.568877	0.585133	0.985173	2.80335	0.981191	1.49879	1.93473	1.16441	0.534483	0.574296	0.606603	0.278236	1.38301	1.50545	2.17445	1.00137	2.43606	1.07597	1.51423	0.879044	0.500587	0.834973	1.55919	0.538019
107	1.35228	0.426242	0.233779	1.28582	3.03069	2.15511	2.02277	0.310917	0.314175	0.178338	0.252625	0.345939	2.03199	0.662399	1.88533	0.266153	0.631768	0.852428	1.46774	0.341404	2.62888	1.91939	0.981725	1.00757	0.143939	0.0651562	0.291578	0.741856	2.93418	0.466769	1.6559	1.87842	0.951698	0.41954	0.254305	0.354631	0.178491	1.93945	2.08031	1.81758	1.39197	1.85699	0.114937	0.643156	0.763098	0.303433	1.41379	1.34432	0.278644
112	1.02	1.1172	0.803074	0.832563	1.01851	1.31314	1.49828	1.20273	0.892679	0.951028	1.15062	0.927	1.16741	1.36931	1.31022	1.18264	1.05488	1.12402	1.19422	1.25891	1.06592	1.11684	1.00096	0.818128	1.57866	0.988407	1.14281	1.31679	1.78349	0.68748	1.02172	1.11439	0.959163	1.20465	0.995662	1.03766	1.15279	1.60932	1.61735	1.7442	1.04146	0.835315	0.858663	0.811979	1.7119	0.881133	0.566505	2.04013	0.930071
115	1.3691	1.00566	1.04705	1.20816	1.74511	1.34015	1.31351	1.08624	1.00673	1.21416	1.33136	1.26167	1.45349	0.841525	1.94504	1.01625	1.06621	0.984475	1.56422	1.06918	3.32236	1.51515	1.03887	1.10925	1.24841	0.782756	1.17118	1.00236	1.28767	0.929819	1.03133	1.30428	1.07113	0.882625	1.07462	1.48788	1.016	1.07835	1.1008	1.48566	1.20614	1.22963	1.11297	1.36357	1.13306	0.873335	0.643081	1.13704	1.0547
116	0.742375	1.08704	0.93843	0.912007	1.33139	0.904994	0.877275	0.709939	0.970841	0.935354	1.18392	0.954217	0.953962	0.832785	1.16648	0.855864	1.05396	0.876546	1.06214	1.11259	1.05883	0.997055	0.762884	0.694631	1.17637	0.786747	1.32187	0.861852	0.999368	0.631272	0.703439	0.856048	0.979863	1.05213	1.07512	1.16266	1.11671	0.85106	0.7897	1.11599	0.744533	0.77505	1.08235	1.11907	0.951093	0.928708	0.606685	1.24206	0.950522
117	0.963813	0.886522	0.857969	0.663539	0.998136	0.715873	0.650619	0.771864	0.882876	0.695392	1.01319	1.24852	0.718674	0.752026	0.925708	0.744841	0.981298	0.742272	0.750827	0.844585	0.843907	0.84337	0.766728	0.606045	0.986928	0.7048	1.02152	0.855399	0.753202	0.51138	0.642844	0.790861	0.902211	0.954147	0.880941	0.898096	0.993689	0.60718	0.645407	0.943332	0.6321	0.76933	0.934881	1.02466	0.74689	0.857372	0.569497	0.977318	0.944109
118	0.861946	0.957309	0.891565	0.782047	1.14163	0.831552	0.756262	0.750297	0.933986	0.815201	1.1096	1.0924	0.815915	0.801562	1.04476	0.803439	1.00678	0.794741	0.906884	0.983301	0.941379	0.92451	0.746839	0.626766	1.0632	0.742658	1.1482	0.859162	0.860535	0.590718	0.663299	0.843739	0.903941	0.993285	0.957982	1.04808	1.06811	0.719629	0.716768	1.04763	0.713926	0.765761	1.0049	1.0662	0.832402	0.897813	0.596946	1.07533	0.94979
121	1.06425	0.792348	0.828759	0.54813	0.706295	1.13578	0.741648	1.00637	0.904649	0.7169	1.19516	1.07786	0.58221	0.703944	0.915088	0.749088	0.894026	1.10177	1.25305	1.10462	0.806721	1.18805	0.844433	0.985697	0.869326	0.638854	0.790106	1.04599	1.01882	0.804071	0.765586	0.971669	1.21271	0.980526	0.724803	0.810632	1.17435	0.792285	0.961542	1.03552	0.848291	0.91367	0.709028	1.14316	0.802593	0.754152	0.507546	1.21578	1.20711
122	1.01572	0.94998	0.909328	0.673315	0.867617	0.998782	0.856642	1.07523	0.891723	0.826034	1.07935	0.952787	0.552359	0.780021	1.10963	0.725334	0.990512	1.0047	1.2531	0.921579	0.729398	1.13053	1.03909	0.975323	0.994861	0.722799	0.845605	0.839103	0.830889	0.595831	0.715623	0.995142	1.10682	1.05155	0.852205	0.884783	1.01242	0.798237	0.962747	0.953633	0.815746	0.920711	0.829511	1.12949	0.715005	0.746682	0.531025	1.07022	1.29672
123	1.06036	0.804493	0.812439	0.578017	0.862101	0.712052	0.609427	0.795241	0.823034	0.605423	0.940828	0.943398	0.660578	0.725685	0.836338	0.690729	0.944554	0.669866	0.663809	0.755176	0.756125	0.764152	0.742605	0.592994	0.944191	0.673346	0.924541	0.859022	0.679329	0.487938	0.618238	0.760861	0.830452	0.907816	0.821862	0.808485	0.93773	0.528432	0.596078	0.873119	0.576776	0.755813	0.875975	0.987834	0.644294	0.800198	0.582415	0.890528	0.941644
124	1.05274	0.746947	0.781046	0.528613	0.764387	0.655979	0.545804	0.823822	0.837482	0.535887	0.877882	0.943221	0.589387	0.694907	0.75066	0.689034	0.915514	0.614509	0.570747	0.656395	0.667333	0.749061	0.752163	0.630226	0.889458	0.647545	0.741004	0.86892	0.618794	0.424673	0.59247	0.790399	0.78923	0.873718	0.676368	0.705713	0.874917	0.472328	0.563748	0.799059	0.55782	0.779309	0.819534	0.94025	0.573105	0.757644	0.575204	0.807115	0.927185
126	0.625343	1.27761	0.989719	1.13883	1.61934	1.07408	1.05914	0.746109	1.06502	1.24714	1.27555	1.34717	1.16597	0.921238	1.40209	0.967242	1.1053	1.07813	1.33746	1.3436	1.24228	1.16	0.778959	0.869994	1.32674	0.881752	1.7009	0.920299	1.25344	0.826321	0.769132	0.93268	1.09658	1.14083	1.26087	1.45104	1.22346	1.10583	0.948586	1.30476	0.847302	0.864392	1.25025	1.16849	1.21478	1.00831	0.644901	1.50872	0.975857
127	1.09542	0.922512	0.859177	0.495018	0.758442	0.886624	0.762095	1.04201	0.861049	0.840764	1.06401	1.11237	0.604996	0.765042	0.943271	0.868584	0.889336	1.23959	1.38955	0.970984	0.750117	1.21206	1.07131	1.00174	1.12427	0.695776	0.910212	0.958816	1.00044	0.68814	0.758154	1.12282	1.16348	1.10009	0.914201	0.875905	1.1335	0.88432	1.01372	1.08639	0.849872	0.956648	0.735852	1.2153	0.781871	0.842503	0.427818	1.08039	1.43302
128	0.686665	1.19786	0.956868	0.979268	1.429	1.03168	0.937485	0.748342	1.01233	1.09498	1.23495	1.387	1.09341	0.871152	1.26601	0.900956	1.07886	0.975862	1.19811	1.224	1.17968	1.07316	0.886078	0.73709	1.22631	0.856277	1.50986	0.872145	1.15136	0.678182	0.727081	0.934562	1.03168	1.11053	1.17802	1.30756	1.15828	0.970763	0.85178	1.2096	0.793811	0.794769	1.14614	1.12323	1.10052	0.965185	0.627429	1.41436	0.964906
129	0.941077	0.901911	0.912624	0.769959	1.03841	0.891494	0.818353	1.09104	0.890896	0.702368	0.894392	0.768051	0.586948	0.635817	0.905738	0.878305	0.920258	0.716574	0.688292	0.69554	0.541684	0.872407	0.883101	0.85017	0.877823	0.688101	0.921401	0.847458	0.571982	0.615277	0.659356	1.01639	0.866752	0.888847	0.82398	1.12198	0.917032	0.684148	0.777622	0.892962	0.628066	0.771577	0.915111	1.00195	0.542732	0.783792	0.52182	0.936608	1.07453
130	1.0322	0.746608	0.728029	0.553219	0.746277	0.619554	0.635207	0.898051	0.802255	0.513052	0.820433	0.736855	0.550791	0.621227	0.693903	0.69156	0.871861	0.598844	0.565254	0.605078	0.573036	0.715208	0.734637	0.723173	0.873482	0.632313	0.697617	0.882626	0.539962	0.463461	0.587418	0.801019	0.78995	0.826205	0.638604	1.02361	0.820308	0.434499	0.571104	0.720255	0.513239	0.788828	0.813483	0.89822	0.470319	0.730062	0.565743	0.725175	0.9286
131	0.997484	0.954955	0.922206	0.725826	0.939311	0.908137	0.769624	1.06811	0.844147	0.731484	1.07192	0.871236	0.572666	0.649419	0.949285	0.788849	0.921545	0.817984	0.928071	0.760429	0.629279	0.917541	1.03016	0.902925	0.909951	0.777583	0.890318	0.858301	0.685651	0.634582	0.721338	0.901314	0.935919	0.995003	0.864002	1.03041	0.957009	0.849788	0.85217	0.954097	0.725711	0.851147	0.875617	1.02968	0.575225	0.770092	0.610993	0.974527	0.881316
133	0.964805	1.13097	0.915069	1.14725	1.29302	1.16987	1.26834	1.03333	1.14029	1.1833	1.27764	1.11839	1.06088	0.924345	1.49722	0.878987	1.13367	1.28063	1.35198	1.27744	0.867839	1.08638	1.07777	1.09736	1.04276	1.09105	1.07996	1.37018	1.64169	1.361	0.777837	0.954482	1.03913	0.926372	1.01556	1.18538	1.21037	0.846342	1.16873	1.00486	1.00855	1.01998	0.820713	1.22565	1.62689	0.89642	0.819582	1.50502	0.980805
134	1.7335	1.00567	1.01181	1.27375	1.5506	1.26234	1.26455	1.45077	1.22135	1.34057	1.26361	1.52585	1.50469	1.70716	1.18848	0.917001	1.23445	1.64134	1.50059	1.16151	2.13206	1.49035	1.37762	0.995128	1.29735	1.19775	1.14153	1.25485	1.44399	0.875158	1.33102	1.29956	1.32873	0.849259	1.28516	1.02178	1.10612	1.54908	1.61826	1.76103	1.27666	0.957022	1.23355	1.19628	1.30466	1.15361	1.30944	1.6476	1.23988
135	1.22033	0.886066	0.648654	1.24178	1.73455	1.22668	1.16474	0.977785	1.11965	1.07518	1.21867	1.16327	1.38561	0.957429	1.71616	1.15127	0.90593	0.939186	1.45299	1.1096	2.4653	1.37019	0.85827	0.978358	1.12256	0.76467	1.00996	1.11593	1.28876	0.869015	1.01189	1.27977	0.969836	0.952922	1.11826	1.25052	0.932404	1.00668	1.08518	1.20423	1.0216	1.02016	1.07563	1.33305	0.96195	0.85804	0.930587	1.22742	0.88927
136	1.60135	1.0057	0.988618	1.41523	1.92939	1.45728	1.12487	1.30902	1.20603	1.00784	1.17779	1.53705	1.39436	1.54232	1.25484	1.24255	1.6297	2.16451	1.47143	1.15981	2.17131	1.71155	1.35506	1.0667	1.1708	1.02292	1.04387	1.35266	1.57459	0.93147	1.46288	1.4286	1.45856	0.942818	1.25453	0.888309	1.16859	1.56798	1.66646	1.84692	1.47313	0.956185	1.26437	1.09264	1.36329	1.04922	1.20879	2.35345	1.13807
137	0.579148	1.30231	1.02086	1.24986	1.66779	1.17277	1.17772	0.745023	1.05745	1.39663	1.30539	1.06687	1.29305	0.903651	1.47411	0.968178	1.1201	1.18027	1.48405	1.47327	1.2827	1.18783	0.772756	1.06912	1.35191	0.886058	1.84758	0.911171	1.39747	0.922189	0.756603	0.942469	1.1971	1.20126	1.27017	1.5239	1.23409	1.17113	0.98461	1.31371	0.850133	0.85454	1.31547	1.25891	1.31354	1.02429	0.655654	1.78685	0.952103
138	1.30584	0.985709	0.966543	0.892967	1.16443	1.16477	0.996107	1.30247	0.846925	1.22224	1.33018	1.24009	0.906877	1.00281	1.39767	0.918939	0.903403	1.41664	1.95947	1.23375	1.14422	1.5069	0.837665	1.03379	1.04428	0.802381	1.09994	1.11163	0.966354	1.18232	0.906833	1.18609	1.21918	1.36931	1.04461	1.11521	1.25043	0.962906	1.0426	1.20327	0.93487	1.07825	1.11847	1.39948	0.867231	0.804265	0.603662	1.27314	1.27095
141	1.17267	0.91315	0.911598	1.00332	1.50463	1.23981	1.18127	0.984209	1.08894	1.04501	1.29825	1.21846	1.13744	0.970421	1.51152	0.863148	0.927607	1.23894	1.86436	1.38797	1.84994	1.49191	0.876333	1.05128	1.07533	0.753053	1.11726	1.11011	1.23081	0.980971	1.00718	1.13081	1.07835	1.12899	1.08237	1.13339	1.12609	1.14559	1.18417	1.35088	0.903629	1.2023	1.06337	1.34041	0.990645	0.860168	0.987357	1.31365	1.09203
143	2.13399	1.03622	1.04023	1.48967	1.97115	3.04702	0.908394	1.50306	1.15937	1.02913	1.53633	1.84142	1.59999	2.15021	1.26316	1.28598	1.25557	1.91657	1.88982	1.49928	1.7876	1.90427	1.3552	1.36775	1.12126	0.992697	1.26243	1.22963	1.5132	1.2836	1.64366	1.50375	1.66129	1.39693	1.28927	1.1998	1.53896	1.46177	1.75308	1.73025	1.60053	1.55156	0.824308	1.47261	1.53673	1.11406	1.45305	2.06629	1.26188
149	1.21393	1.17177	1.03705	1.22609	1.10839	0.999533	1.17515	1.17195	1.18608	1.24201	1.13347	1.41434	0.882788	1.09529	1.24279	1.22828	1.2754	0.932673	0.951435	0.947429	0.95404	1.34304	1.28807	0.805455	1.06745	1.08965	1.03608	1.08633	1.05363	0.963585	1.24329	1.2793	1.18922	1.00668	1.18006	1.26217	0.961947	1.0603	1.11563	1.27552	1.2253	0.772009	1.2346	1.16978	1.1229	1.12231	0.900868	1.2519	1.16351
150	0.483389	1.33256	1.00159	1.2197	1.47394	1.1366	1.18213	0.750577	1.02726	1.51553	1.24681	1.16935	1.3301	0.910361	1.40149	0.962826	1.08383	1.30081	1.37356	1.39537	1.26234	1.15762	0.796885	1.06438	1.34913	0.931401	1.98339	0.870177	1.50393	0.928415	0.782037	0.91475	1.29367	1.18065	1.29423	1.56927	1.2593	1.1441	0.93754	1.33784	0.843835	0.881151	1.39999	1.15295	1.32726	0.993984	0.627959	1.39464	0.933375
155	1.24741	1.1015	0.982017	1.17805	0.989505	0.899802	1.09933	1.27733	1.16504	1.11484	1.00072	1.28036	0.848333	1.10728	1.19488	1.27183	1.22568	0.905913	0.891637	0.880617	0.978055	1.27978	1.37831	0.827401	1.01118	1.11363	0.925444	1.13896	1.00861	0.915239	1.2114	1.22621	1.1792	0.971673	1.13449	1.13599	0.880296	1.06319	1.10181	1.22871	1.17651	0.762947	1.22408	1.13104	1.06501	1.2363	1.11186	1.21789	1.14349
156	0.591227	1.07825	0.955656	1.10292	1.24871	1.09304	1.18124	0.806365	1.03298	1.74493	1.08204	1.21853	1.11636	0.792208	1.25995	1.02549	1.03682	1.35137	1.15618	1.16318	1.01233	1.0456	0.87409	1.31024	1.42956	0.844554	1.94914	0.864531	1.25271	0.916949	0.803558	0.94786	1.40804	1.10169	1.22159	1.22754	1.19661	1.2918	1.05827	1.30786	0.775037	0.88394	1.14367	1.07251	1.19185	1.01798	0.673296	1.21943	0.956077
157	0.769839	1.05992	0.925055	0.944727	0.987022	0.996136	1.25585	0.898247	0.852561	1.33737	0.977375	1.25505	1.14153	0.82497	1.46585	0.942492	1.02243	1.50181	1.10253	1.04105	0.692417	1.03895	0.895884	1.43336	1.12282	0.895431	1.42136	0.998678	1.28505	0.809677	0.792448	0.990767	1.48435	1.07441	1.05382	1.24374	1.04519	1.15448	1.06785	1.13069	0.838588	0.893392	0.87305	1.07406	1.20338	0.96741	0.669687	1.08257	0.91245
160	1.60915	1.04795	3.24654	1.41079	1.78636	2.08663	1.94391	1.0286	1.76329	1.8672	1.59374	1.23263	2.48438	1.30803	1.89097	1.30333	1.24211	4.69728	25.7275	17.8243	3.12521	0.907176	2.29562	1.73918	1.2583	0.861798	1.33933	1.44694	1.99332	3.54206	1.13713	0.955056	12.7921	2.53864	1.12695	1.03364	1.80485	15.0083	14.3797	1.13354	0.841121	1.93603	1.59449	2.03151	1.2995	0.864598	1.63639	1.11302	6.14302
161	1.26816	1.10424	0.87722	1.44018	1.71644	1.37838	1.36178	1.22968	1.40028	0.933411	1.51637	1.41284	1.28545	1.83244	1.93525	1.28998	0.991322	1.10617	1.7655	1.35477	0.902714	1.21265	0.983433	1.03259	2.04697	0.922579	1.12251	1.20842	0.984735	2.41578	1.28815	1.08309	0.939444	1.33394	0.995062	0.995117	1.33353	1.50808	1.1239	1.20013	0.957325	0.924487	1.18456	1.53553	1.90083	1.46103	0.920198	0.914914	0.948225
163	1.13762	1.2651	1.11138	1.30998	1.71842	1.37152	1.49599	0.983921	1.2549	1.58662	1.73747	1.46907	1.62392	0.984397	1.474	1.14045	1.14935	1.05906	1.38852	1.14907	1.25183	1.83534	0.872056	1.01989	1.26534	0.912701	1.34043	1.08123	1.25404	1.12703	1.16722	1.30499	1.20718	0.986623	1.16955	1.57383	1.20598	1.21061	1.30733	1.16733	1.67961	1.05487	1.24041	1.30215	1.21241	0.889727	0.69907	1.55576	1.04003
164	1.00135	0.892592	1.03753	0.657788	0.810063	0.939717	0.802174	0.992574	0.917078	0.812529	0.995127	0.996016	0.806788	0.936043	0.969574	1.00416	0.850529	0.651591	0.58739	0.84754	0.890771	0.699729	0.789049	1.09873	0.848633	0.953888	0.742156	1.01733	0.83517	0.538873	0.922252	0.805791	0.945734	0.971471	0.818118	0.728988	0.760574	0.904023	0.871812	0.821996	0.680562	0.973133	0.703583	0.938785	0.671517	1.03696	0.949886	0.710546	0.846374
165	1.20941	1.56598	5.16275	1.80479	2.09709	1.70737	3.03242	1.39776	23.2803	1.1595	1.86725	1.4477	2.45824	5.34392	2.47548	2.90973	1.19878	9.493	25.4161	28.1474	1.82907	0.895891	8.53708	1.0784	1.87568	1.2798	1.99369	1.51931	1.9056	3.2972	1.30772	3.00171	14.8519	1.42665	1.63913	1.40405	19.6535	6.12903	3.81522	2.03365	0.928005	1.56032	6.01919	1.60986	1.5866	1.31858	3.96313	1.30248	2.02749
166	1.27706	1.02849	0.937486	1.11439	0.906597	0.802786	1.02358	1.38456	1.13796	1.01366	0.902974	1.14526	0.803851	1.0908	1.11744	1.19412	1.19504	0.895728	0.848386	0.816081	1.00859	1.26026	1.53978	0.854859	0.987938	1.11925	0.831173	1.16653	0.971098	0.864143	1.12192	1.11492	1.17396	0.952935	1.07368	1.02511	0.809781	1.022	1.04077	1.16579	1.14061	0.775471	1.19482	1.07745	1.01494	1.29366	1.31045	1.19073	1.16312
167	1.05258	1.01761	1.03823	1.33541	1.64029	1.53283	1.53986	1.20757	1.33602	1.0216	1.72111	1.83919	1.29008	1.53959	1.89509	1.81835	0.908487	1.774	2.08142	1.68033	0.80597	1.327	0.979195	1.26512	1.52382	0.815622	1.50281	1.04925	1.36777	1.67837	0.976395	1.38274	0.978502	1.74535	1.31333	1.08922	1.22311	1.65683	1.23724	1.02245	1.58673	1.2214	1.19041	1.71262	1.44241	0.995999	1.7151	0.799335	0.864159
168	1.36801	1.24876	1.02073	1.41664	1.75677	1.45471	1.25795	1.40869	1.26426	1.12333	1.6985	1.50952	1.94503	3.03331	1.96144	1.53773	0.973153	1.78952	2.7901	1.58528	1.0556	1.16484	0.737857	1.44621	1.898	1.00229	1.52827	1.00981	0.769713	1.91305	0.984436	1.341	1.18613	1.69988	1.35888	1.06067	1.90232	1.44599	1.39722	1.27536	1.05913	1.54597	1.49455	2.3402	1.06992	1.36024	1.35434	0.879788	0.945962
170	0.940314	0.906354	0.902739	0.853584	0.822734	0.834296	0.835435	0.919645	1.04012	0.798973	0.963981	0.802619	0.685796	0.908691	0.989621	0.960794	0.729645	0.636929	0.478062	0.806553	0.878011	0.718727	0.695675	0.885461	0.965032	0.918101	0.700893	1.12556	0.87611	0.578874	0.896769	0.746347	0.870925	0.833408	0.855124	0.753819	0.748224	1.08602	0.949211	0.788678	0.687002	0.783101	0.73419	0.826444	0.88634	1.15705	0.937291	0.767126	0.748021
171	1.11662	1.01056	1.02561	1.37041	1.65905	1.75292	1.52236	1.32756	1.40613	1.07895	1.97913	1.48425	1.36635	1.29736	1.87058	0.944731	0.958103	1.05126	0.877509	1.17594	1.51214	1.25963	0.980264	1.31039	1.30334	0.980631	1.72213	1.24672	1.51022	1.07288	1.22128	0.775243	1.34229	1.68567	1.46121	1.09206	0.976022	2.12972	1.99567	1.73183	1.18366	1.45803	1.34955	1.81293	1.42162	0.861437	1.60024	1.2993	1.64542
172	1.45417	1.30744	7.76869	1.66441	2.10021	1.42053	2.22214	1.92291	14.0944	1.09475	1.76216	1.77726	1.90352	1.55774	1.74772	1.40163	1.15855	27.7213	11.8361	17.4503	2.15304	1.01841	7.11421	1.66806	1.71277	1.19711	1.79025	1.41532	2.21792	3.42578	1.44378	1.355	33.3829	2.52851	1.55349	1.35059	10.942	16.8412	13.8823	1.66107	0.914044	1.85503	2.39354	2.22089	1.48833	0.834453	10.9538	1.15825	9.64709
173	1.27842	0.962994	0.900294	1.0531	0.84641	0.77179	0.997962	1.45346	1.12495	0.899518	0.821609	1.04111	0.762951	1.07343	1.14769	1.21666	1.13347	0.885695	0.814603	0.760351	1.09772	1.2062	1.27174	0.872097	0.948811	1.07976	0.743424	1.15856	0.937071	0.834129	1.06484	1.1189	1.15549	0.920979	0.973118	0.931317	0.743132	1.01628	0.996195	1.08186	1.11336	0.758367	1.10197	1.01871	0.977592	1.32938	1.47251	1.13693	1.13513
177	0.933213	1.19382	1.01224	1.02552	1.18905	0.966928	0.822409	1.21148	1.0744	1.0187	1.12439	0.812866	0.624179	0.761387	0.922119	0.957498	1.02903	1.01404	0.747715	1.01961	0.729322	1.01174	0.825611	1.10347	0.993857	0.780746	1.0916	0.843969	0.934209	0.690206	0.717479	0.926513	1.0892	1.21416	0.955139	1.20527	0.983531	0.701964	0.754533	0.950467	0.827674	0.987013	0.892459	1.04244	0.921237	0.693043	0.473273	0.806797	0.999638
180	1.06182	0.777714	1.00845	0.708004	0.651616	0.954691	0.65646	0.895794	0.858679	0.61366	0.84991	0.605987	0.696684	0.888253	0.947628	0.944529	0.815647	0.594893	0.758247	0.809243	0.596814	0.636118	1.00771	0.773897	0.666656	0.912343	0.811261	0.889501	0.724092	0.526587	0.813642	0.802725	0.812406	0.800339	0.803409	0.578881	0.712015	0.876171	0.903035	0.874086	0.64522	0.939028	0.652186	0.884281	0.937405	0.960017	0.692659	0.688932	0.772164
183	1.0344	0.777765	0.914626	0.658044	0.726847	0.815214	0.652818	1.03338	0.859653	0.676056	0.891061	0.78161	0.572264	0.87993	0.937653	0.826497	0.808049	0.525641	0.514221	0.823778	0.661838	0.675984	0.84524	0.784537	0.809045	0.934674	0.692834	1.0278	0.566863	0.423775	0.882488	0.733554	0.86998	0.832859	0.799864	0.630476	0.744707	0.933774	0.898583	0.954851	0.635586	0.817453	0.692249	0.870331	0.520972	1.04101	0.839739	0.736454	0.8067
184	0.877565	0.930512	0.875504	0.834032	0.893392	0.827065	0.895895	0.897268	0.997254	0.792623	0.984179	0.833177	0.624968	0.835399	0.989344	1.02631	0.705675	0.74349	0.552585	0.813064	0.856013	0.69939	0.656424	0.827578	1.03439	0.891218	0.695243	1.10088	0.839126	0.652775	0.93587	0.8635	0.830812	0.805843	0.847305	0.916783	0.715008	0.973127	0.892549	0.924101	0.699721	0.801056	0.782743	0.799194	0.857253	1.23922	1.18742	0.729842	0.713064
185	1.00873	0.84964	0.991299	0.703601	0.692583	0.74463	0.681142	0.95231	0.800278	0.700401	0.873707	0.800428	0.592602	0.875362	0.867201	0.90798	0.812864	0.633362	0.462518	0.782885	0.729964	0.618901	0.880975	1.02097	0.809752	0.932517	0.697737	1.02116	0.638603	0.462606	0.859263	0.740964	0.850749	0.843438	0.84151	0.674774	0.731317	0.826754	0.772005	0.851435	0.65822	0.773034	0.655994	0.829635	0.644835	1.09403	0.852408	0.710766	0.783504
186	1.31734	0.903199	0.880862	0.985469	0.756647	0.684454	1.06908	1.53316	1.15731	0.820859	0.757913	0.955609	0.757879	1.04494	1.15187	1.13812	1.06529	0.84771	0.764077	0.700775	1.14029	1.12818	1.08748	0.875464	0.87068	1.03308	0.690791	1.12608	0.865401	0.804371	1.03466	1.05324	1.12296	0.863538	0.877494	0.879943	0.703208	0.989105	1.11227	1.10843	1.11047	0.72272	1.0352	0.973591	0.918284	1.39453	1.7527	1.7904	1.1282
188	0.6579	0.951716	0.92779	0.941122	1.43834	1.49519	0.741532	1.4995	1.27359	1.27776	1.74467	0.754124	2.37957	1.07491	0.849963	1.04809	0.87164	1.31533	1.62881	1.07389	1.19816	1.17222	0.807032	1.34178	1.28089	1.04361	0.959674	1.62716	1.2135	0.904364	0.872552	0.8676	1.01809	1.31591	0.856299	0.85121	1.09192	0.928933	0.759997	0.864079	1.36473	1.2118	1.28424	1.39002	0.843549	0.827687	1.28	0.839636	0.679713
191	0.618507	0.65557	0.720869	0.604364	0.85904	0.708935	0.787518	0.758225	1.03264	0.512091	0.931246	0.473451	0.89229	0.767953	0.729677	0.747194	0.712406	0.587882	1.0196	0.789899	0.917656	0.718611	0.789099	0.721908	0.894005	0.647847	0.677205	0.93352	0.501813	0.559185	0.622422	0.633572	0.640937	0.707982	0.601158	0.742271	0.744842	0.810268	0.690338	0.687	0.625578	0.817289	0.707865	0.910485	0.754824	0.579456	0.602049	0.61558	0.590734
192	0.852763	0.931617	0.857015	0.90015	1.06397	0.773184	0.978881	0.878707	1.0779	0.826819	1.00976	0.85771	0.606406	0.833231	1.05127	1.00157	0.674132	0.846208	0.545711	0.806916	0.898722	0.697649	0.771121	0.809069	0.770978	0.840732	0.684674	1.12185	0.889396	0.726497	0.926354	0.716898	0.784068	0.800348	0.875956	0.896468	0.714404	1.13076	0.948953	0.872295	0.699438	0.766637	0.789673	0.846884	0.884041	1.2937	1.25374	0.751283	0.686725
193	0.830343	0.94435	0.848215	0.855421	1.21034	0.739201	0.965259	0.853803	1.11063	0.879624	1.02887	0.869376	0.587773	0.865399	1.08421	1.10978	0.66843	0.824955	0.657733	0.826067	1.03195	0.717325	0.775571	0.801756	0.754959	0.843032	0.714233	1.17893	1.03189	0.788973	0.963472	0.769244	0.793617	0.854575	0.962966	0.911957	0.682638	1.12813	0.974518	0.88391	0.710027	0.7611	0.875077	0.832054	0.876378	1.32921	1.35057	0.776221	0.717351
196	0.83912	0.626517	0.820522	0.597892	0.725218	0.745898	0.837158	1.60795	1.12826	0.737191	1.14784	0.636346	0.772114	1.08272	0.937887	0.982026	0.870312	1.38139	1.27933	0.822	0.951853	0.95878	0.684585	1.50943	0.967114	0.574709	0.804279	1.41228	0.643865	0.756495	0.654747	1.16864	1.10766	1.44639	0.748821	0.852557	1.02232	0.609583	0.786378	0.649509	0.816909	1.50384	0.75789	1.20449	0.68539	0.519538	0.608455	0.811333	1.22664
197	0.97928	0.927339	0.926786	0.698366	0.806399	0.782891	0.676537	1.24252	0.93158	0.72247	0.765204	0.692872	0.459707	0.931684	0.819174	0.898916	1.041	0.905219	0.639257	0.799759	0.642162	0.961195	0.70964	1.30474	0.805955	0.716145	0.877191	0.73853	0.708077	0.621929	0.640372	0.949015	0.948685	1.2504	0.809772	0.900448	1.15319	0.596149	0.674041	0.723952	0.776367	1.02474	0.771375	1.05034	0.814925	0.682829	0.501005	0.595297	1.21134
198	1.62476	0.4823	1.00921	1.3947	2.55734	1.72115	1.65472	1.20325	0.633339	0.717869	1.23774	0.759387	1.97181	1.83394	1.49602	0.684633	1.21678	1.70703	1.77193	0.867916	2.39288	1.52996	1.00864	0.972443	0.880921	0.628786	0.367106	1.49295	1.98679	0.745751	1.07479	1.76864	0.665425	1.50543	0.3253	0.74809	0.969472	1.6644	2.48579	1.74765	1.16944	1.37902	0.546996	1.48723	1.82543	1.58448	1.31515	2.84268	1.23726
199	0.87005	1.01131	0.962711	0.867626	1.00989	0.893932	0.7756	1.11648	0.982104	0.931709	0.963601	0.775138	0.500085	0.722141	0.867199	0.888666	1.01125	0.984577	0.793477	0.921113	0.670507	1.05624	0.693111	1.18827	0.863547	0.739535	1.08935	0.771231	0.79289	0.677701	0.668552	0.880979	0.912234	1.32453	0.995487	1.05482	0.889862	0.62561	0.695799	0.813329	0.875544	0.940784	0.906822	1.02504	0.851827	0.758672	0.502307	0.725839	1.06817
200	0.817922	0.959953	0.824003	0.946571	1.18601	0.784795	1.11267	0.809547	1.20577	0.874638	1.01575	0.897677	0.605978	0.773785	1.16604	1.06732	0.608032	0.972942	0.742477	0.856808	1.00646	0.770519	0.76168	0.735882	0.969543	0.784358	0.72658	1.16436	1.18659	0.997887	0.960704	0.751141	0.764397	0.778832	1.00264	0.952318	0.736018	1.13042	0.865863	0.896408	0.74314	0.719683	0.897455	0.893442	0.940529	1.28828	1.28297	0.860794	0.682214
201	1.3919	0.600457	0.776768	0.916982	1.56391	1.29364	1.26354	1.04732	1.01052	0.715171	0.843954	0.808512	1.40857	0.761319	1.76046	0.796618	0.858603	0.991425	1.42226	0.776938	2.07031	1.22055	1.03449	0.750432	0.663313	0.645504	0.491393	1.35684	1.59129	0.693129	1.1084	1.29794	0.965276	0.588228	0.53056	0.694508	0.786291	1.92679	2.19759	1.6484	1.25352	1.00175	0.75184	0.956008	0.803995	0.913644	1.06537	1.84364	1.09183
202	0.792748	0.988185	0.788602	0.917404	1.24603	0.736437	1.21211	0.80389	1.14852	0.902775	1.0456	0.8868	0.772522	0.892522	1.23023	1.11195	0.634126	1.12945	0.986094	0.873723	1.0525	0.753127	0.813268	0.683315	0.966399	0.810091	0.750654	1.18627	1.2406	1.08783	0.956458	0.788345	0.756499	0.84199	1.06746	1.03815	0.80195	1.34563	1.04935	0.983566	0.731431	0.749816	0.98308	1.03742	0.967092	1.27933	1.16331	0.914179	0.681413
204	0.818768	1.14599	1.07821	1.16914	1.33016	1.01785	0.984887	1.12593	1.34636	1.05409	1.26775	0.710655	0.718176	0.727197	0.909291	0.726737	1.03915	1.09369	1.63497	1.09516	0.806317	1.17636	0.700097	1.1502	1.19919	0.765881	1.25529	1.01483	1.05636	0.821159	0.658286	0.702454	0.944129	1.2149	1.04159	1.3096	1.04113	0.755461	0.685782	0.813542	0.926252	1.04131	0.987349	1.0826	0.887874	0.706809	0.515454	0.961867	0.871593
205	0.748545	0.674524	0.831894	1.45742	1.90385	0.858227	0.646658	0.955381	1.03049	0.719489	1.07917	0.645654	1.04442	0.940538	0.81788	1.12316	0.834988	0.87423	1.13725	0.996326	1.42247	0.764156	0.818097	0.880674	0.871431	0.700454	0.955514	1.09396	0.916545	0.676783	0.888955	0.900521	0.934076	1.11136	0.768873	0.872502	0.861609	0.851002	0.740575	0.699729	0.638206	1.06678	0.804324	0.800353	0.973336	0.53055	0.876929	0.884646	0.800565
206	0.850243	0.770586	0.839595	0.564438	0.66642	0.693768	0.654636	1.22425	0.902579	0.631016	0.788952	0.816574	0.427713	0.610785	0.751361	0.87978	0.914858	1.07606	0.816117	0.701217	0.737283	0.640414	0.624034	1.0925	0.755888	0.635837	0.810235	1.13743	0.979101	0.660952	0.648785	1.02199	1.03481	1.52812	0.767506	0.878134	0.896812	0.503033	0.622036	0.657888	0.555529	1.22978	0.692309	1.05727	0.701257	0.626432	0.469051	0.666623	1.01603
208	0.733875	0.627426	0.757486	0.801457	0.961064	0.75491	0.680672	0.811885	1.06666	0.526258	0.915421	0.444477	0.893339	0.59048	0.658846	0.787973	0.730778	0.586003	1.1561	0.923137	0.798522	0.494838	0.593836	0.864982	0.903036	0.66485	0.609834	0.949813	0.506894	0.561876	0.580833	0.6634	0.635397	0.758745	0.513176	0.681906	0.738425	0.831921	0.81851	0.648148	0.388845	0.920323	0.623159	0.780658	0.671056	0.45359	0.575423	0.619694	0.624072
209	0.762847	0.987664	0.72587	0.984369	1.26551	0.954008	1.2333	0.78137	1.17557	0.938916	0.984502	0.908485	0.909298	0.982755	1.40369	1.15419	0.619976	1.36396	1.59138	1.01917	1.20205	0.791954	0.93966	0.713792	1.22198	0.762853	0.849851	1.24088	1.01731	1.31288	0.991992	0.855861	0.686762	0.851643	1.0912	1.09513	0.775701	1.27441	1.04597	1.04131	0.753584	0.808976	1.02246	1.05411	0.933455	1.22119	1.55823	1.01208	0.66191
212	1.2573	0.859256	0.806469	0.885791	0.813138	0.639594	1.15115	1.52407	1.06713	0.754421	0.706257	0.855669	0.894317	1.04357	1.27683	0.994748	0.991425	0.817097	0.83934	0.670547	1.34842	0.992011	1.06277	0.880826	0.850355	0.965874	0.632382	1.14	0.912607	0.744351	1.09321	1.06545	1.22385	0.776721	0.786764	0.823075	0.646138	1.19858	1.31456	1.10048	1.1434	0.754648	0.955372	0.913634	0.81253	1.3135	1.66091	2.00551	1.04153
213	0.793152	1.27685	1.01186	1.19274	1.59354	1.38134	1.25927	1.03967	1.27433	1.6512	1.69775	1.07876	1.68332	1.02731	1.20017	1.26316	0.956346	1.14449	1.65327	1.2024	1.23128	1.26387	0.957186	1.2192	1.2458	1.00954	1.31498	1.26278	1.35857	1.08957	0.848456	0.957166	0.954477	1.06596	1.13435	1.67113	1.12081	0.940348	0.840703	0.731332	1.36316	1.07307	1.38258	1.33465	1.18139	0.828319	0.977275	1.36326	0.828261
215	0.83678	0.768814	0.765058	0.758732	1.04353	1.25179	0.767945	1.66147	1.45107	0.908476	1.41272	0.594305	0.795857	1.21959	1.30388	0.994307	0.821549	1.444	1.42972	0.885914	1.29132	0.685485	0.763474	1.41797	1.16063	0.73383	0.898095	1.56873	1.02271	1.09286	0.741961	1.18944	1.02916	1.3053	0.902682	0.789625	1.48794	0.769427	0.731911	0.709811	0.749852	1.31435	0.991028	1.3554	0.890625	0.538888	0.715264	0.87071	0.800505
218	0.792463	1.11912	1.05527	1.23168	1.44845	1.00039	1.00276	1.11607	1.39094	1.02131	1.43224	0.688681	0.708562	0.640595	0.88873	0.625888	0.948326	0.929647	1.47666	1.19954	0.968131	0.932381	0.622898	1.17438	1.26486	0.742382	1.15141	1.56486	1.11664	0.733538	0.633955	0.646795	0.946553	1.15646	0.892882	1.29302	1.04708	0.74773	0.712436	0.81859	0.719706	1.04331	0.968907	1.17907	0.701437	0.587649	0.680998	1.08855	0.867022
219	0.703454	0.641498	0.766911	0.945499	1.03493	0.63561	0.788218	0.882848	1.10065	0.52885	0.925462	0.490981	0.866525	0.64173	0.582952	0.754289	0.734441	0.644006	0.995341	0.813272	0.735877	0.489508	0.546749	0.808408	0.918374	0.696735	0.63512	0.976786	0.642042	0.618814	0.536356	0.580132	0.667864	0.803551	0.562657	0.653769	0.725737	0.739168	0.712181	0.622563	0.449242	0.942853	0.634674	0.795951	0.667751	0.414395	0.613042	0.508845	0.614394
222	0.739728	0.698095	0.836791	1.29647	1.83012	0.750765	0.811451	0.963298	1.11132	0.593796	0.999954	0.607476	0.981073	0.817823	0.575577	0.829326	0.84386	0.756284	1.01113	0.93424	0.705839	0.735375	0.739343	1.16077	1.12247	0.739032	0.764444	1.01824	0.750854	0.779481	0.645918	0.74665	0.765402	0.959835	0.696497	0.617409	0.767401	0.888755	0.818007	0.666213	0.677537	0.992883	0.70694	0.776712	0.736258	0.366482	0.702758	0.608278	0.727163
223	0.594164	0.646671	0.668465	0.702725	0.997292	0.481187	0.864018	0.647895	1.07878	0.561668	0.960409	0.553474	1.15102	0.850643	0.721075	0.840906	0.662153	0.644957	1.31769	0.925259	1.02515	0.640145	0.796934	0.665798	1.01076	0.616513	0.807309	0.902535	0.522488	0.710559	0.668329	0.723085	0.646954	0.716271	0.762676	0.644502	0.741461	0.771876	0.703386	0.712633	0.614237	0.764839	0.738025	1.03433	0.904029	0.614455	0.623663	0.706985	0.569809
225	0.569883	0.598125	0.70964	0.623592	0.750165	0.774495	0.708509	0.746417	1.1853	0.497051	0.903583	0.440069	0.919443	0.613305	0.683053	0.688803	0.687027	0.547291	0.952847	0.770098	0.855337	0.851153	0.646913	0.855223	0.926378	0.643874	0.698953	0.953876	0.360108	0.500722	0.56027	0.626073	0.596723	0.719603	0.60638	0.657094	0.745937	0.814849	0.831083	0.64752	0.694549	0.860602	0.728663	0.909709	0.686465	0.467072	0.569159	0.642507	0.587576
228	0.758893	0.63287	0.782643	1.1526	1.68271	0.932498	0.762578	1.02344	1.317	0.93495	1.14016	0.486985	0.970727	0.903256	0.519267	1.22785	0.856633	0.97594	1.24711	1.07039	1.28034	1.0422	0.504303	1.02002	1.10885	0.764114	1.02684	1.1069	0.800783	0.713841	0.71831	0.916293	0.805785	1.25524	0.850549	0.75084	1.02333	0.794885	0.772523	0.734611	0.793153	1.09666	0.886717	0.838043	0.625799	0.671812	0.926615	0.80835	0.841216
229	0.713819	0.743155	0.900187	1.2274	1.57958	0.911179	0.885878	1.08156	1.45597	0.65042	1.1373	0.711066	1.00473	0.91163	0.766598	1.19922	0.878665	0.922273	1.27908	1.14811	0.911803	0.779499	0.698532	0.876641	1.1955	0.714315	0.895551	1.05318	0.720468	0.751179	0.751636	0.915174	0.834818	0.984331	0.790244	0.659621	0.870189	0.828647	0.793769	0.700531	0.637928	0.930953	0.773694	0.78559	0.720181	0.425581	0.855775	0.746505	0.824083
230	0.69114	0.974684	0.67292	0.995366	1.41324	1.07075	0.92964	0.781826	1.23699	0.95642	1.19595	0.889953	1.09473	1.2053	1.26038	1.22561	0.6905	1.67509	1.99273	1.08313	1.35089	0.863138	0.833129	0.692184	1.31477	0.701283	0.888544	1.17684	1.02188	1.46852	1.01582	0.914978	0.730717	0.888315	1.15323	1.17918	0.838608	1.30998	1.12581	1.07679	0.778788	0.833309	1.16187	1.09802	1.13942	1.06933	1.55387	1.08207	0.740513
231	0.739812	0.982533	0.790042	1.02415	1.60818	1.10176	1.03107	0.856976	1.19751	0.980847	1.05941	0.86333	1.0247	1.32489	1.21296	1.16397	0.788987	2.02283	2.42843	1.1514	1.26305	0.945956	0.910688	0.809598	1.35737	0.767873	1.01539	1.19104	1.19298	1.59337	0.958302	0.983247	0.784685	1.09688	1.13954	1.26536	0.855948	2.07059	1.89655	1.17458	0.8354	0.908527	1.16253	1.07652	1.37846	0.899193	1.24298	0.916402	0.684135
234	0.875997	0.522864	1.0509	1.08631	1.08214	1.30415	0.806719	1.12507	0.811214	0.764407	1.18491	0.889722	1.5651	1.06469	1.04062	1.09908	0.693194	1.12172	2.31286	1.67543	0.966749	0.820346	0.539928	1.0466	1.50796	0.614476	0.783805	1.11483	0.906915	0.672341	0.986587	0.89534	1.00556	1.07617	0.786352	1.17452	0.817729	0.625506	0.471522	1.65406	0.694201	1.02914	0.998712	0.980004	0.651557	1.71888	1.10933	0.868885	0.715415
239	0.630082	1.04522	0.922867	1.0158	1.05774	0.884999	1.40183	1.1884	1.33003	0.896906	1.28566	0.866676	1.37062	1.0815	1.47767	0.968871	0.804927	0.945822	1.11288	1.003	1.53639	1.45918	0.531646	1.07472	1.1655	0.901098	1.03578	1.09313	0.874206	0.851112	0.925551	0.753938	1.23991	1.24906	0.983596	0.881672	0.890949	1.00971	0.942009	0.869023	0.977193	0.984353	1.29766	1.18389	0.718817	1.69946	1.11202	0.709521	0.781797
240	0.797293	0.572248	1.04612	1.10366	1.2503	1.21792	1.05401	1.06426	1.87457	1.26344	1.33559	0.628689	1.14712	0.8959	1.72069	0.993705	0.869605	1.02303	1.94248	1.49854	1.12009	1.16927	0.725423	1.08703	2.08393	0.479282	0.966551	1.06804	1.72679	1.66363	0.887156	0.821785	1.23795	1.20088	0.900592	1.17442	0.953115	2.30401	1.66397	1.17514	0.809557	1.08171	0.844852	1.18238	0.654766	1.86179	1.12026	0.701025	0.758116
241	0.596528	0.648648	0.989645	0.88266	0.889292	1.04666	0.68339	1.16667	1.63734	0.778654	1.17016	0.71126	2.22618	1.23335	1.11223	1.06381	0.86647	1.12247	0.92105	0.929685	0.8917	1.0642	0.862434	0.978809	1.31708	0.693919	1.01265	1.1013	1.13958	1.24182	0.852266	0.873049	1.03408	1.13452	0.937374	1.03698	0.979854	0.897188	0.743159	1.15895	0.73868	0.964776	1.06433	1.02888	0.539043	1.57024	1.05253	0.849948	0.682667
243	0.779536	0.764571	0.754707	0.860726	1.05599	0.784778	1.05452	0.987325	1.03885	0.798921	1.09381	0.812706	1.21592	1.05962	0.862006	0.909888	0.76582	0.838089	1.63499	1.0962	1.19324	0.700723	0.787937	0.773274	0.946676	0.693926	0.995645	0.895982	0.983089	0.820213	0.758268	0.807801	0.760225	0.82922	0.876007	0.810841	0.851184	0.85065	0.87498	0.767397	0.779475	0.838516	0.856359	1.03298	1.07953	0.677492	0.855788	0.793309	0.648122
245	0.816947	1.00139	0.675133	1.0099	1.47511	1.16194	1.24101	0.89276	1.31973	0.998521	1.03686	0.82819	1.26673	1.02623	1.29702	1.24163	0.866504	2.13947	2.94572	1.38333	1.63869	0.877069	1.11225	0.911216	1.52418	0.778821	1.034	1.29486	1.18629	1.79937	1.00877	0.999228	0.719004	1.14513	1.3318	1.22796	1.07036	1.42076	1.96113	1.11107	0.760104	1.05613	1.07092	1.28008	1.1002	1.02016	1.37728	1.96832	0.695416
248	1.04952	1.0592	6.4687	1.09333	1.63476	1.58295	1.50563	1.34633	1.26579	1.49263	1.67942	0.97238	2.15324	1.15027	1.3842	1.39818	1.19668	2.1806	22.8367	19.9099	7.80371	1.16996	1.74664	1.45404	1.63971	0.811166	1.27039	1.52904	1.32143	1.88607	1.30832	1.1456	11.6872	1.98377	1.22365	1.00208	2.87515	16.0715	16.1399	1.23302	1.24662	1.63096	1.08272	1.78092	1.51248	0.875869	2.06411	2.67191	9.07737
252	0.949802	1.06408	0.821798	1.0569	1.63086	1.1926	1.1337	1.10543	1.29085	1.04211	1.57393	0.809952	1.31981	1.35566	1.38476	1.34969	1.00088	2.09402	2.35247	1.31451	1.34917	1.05528	1.19702	1.109	2.17259	0.816783	1.31277	1.17849	0.886507	1.72552	1.00607	1.09886	0.733527	2.89586	1.31114	1.07071	0.876109	0.95715	1.23283	1.10013	1.06049	1.24112	1.10876	1.46975	1.35012	0.87822	1.40472	1.31628	0.7728
253	1.1567	1.20338	1.09781	1.273	1.25159	1.19439	1.21138	1.03595	1.18789	1.3798	1.29564	1.56792	0.947156	1.08647	1.27316	1.21009	1.32233	0.969215	1.03343	0.998879	0.982219	1.38095	1.16993	0.763856	1.05765	1.00373	1.14523	1.01292	1.07599	1.00996	1.21311	1.33757	1.20007	1.01702	1.18549	1.36493	1.07385	1.08421	1.1515	1.32133	1.22535	0.772491	1.23387	1.2103	1.16019	1.01366	0.70753	1.29367	1.15725
255	0.971485	1.06626	0.75336	0.991156	1.55827	1.34802	1.36276	1.13734	1.40857	1.07011	1.41009	0.795445	1.19262	0.838952	1.29384	1.22045	0.954509	1.33675	1.89657	1.50832	1.45834	0.864563	1.03558	1.08395	1.75545	0.878793	1.14017	1.41713	1.17046	1.65171	1.20236	0.901591	0.88666	1.32411	1.11992	1.39426	0.885041	1.38491	1.57381	1.15274	0.796878	0.783021	1.11207	1.60409	1.37937	0.937662	1.2918	1.3393	0.862456
256	1.09339	1.24701	1.15582	1.28989	1.42279	1.38008	1.26703	0.950331	1.19544	1.50909	1.47533	1.75143	1.05065	1.05744	1.36129	1.17846	1.37659	1.02925	1.11678	1.04413	1.01424	1.43857	1.00649	0.769425	1.11678	0.929684	1.28205	0.944564	1.08157	1.05256	1.20094	1.27689	1.20242	1.03643	1.17276	1.48591	1.17934	0.964979	1.03859	1.32261	1.25021	0.797348	1.23394	1.25522	1.18574	0.898281	0.558869	1.35501	1.15443
257	1.0441	1.28852	1.17418	1.24697	1.55483	1.62179	1.25421	0.887141	1.20144	1.61636	1.60515	1.8189	1.12104	0.999534	1.33056	0.932421	1.39649	1.13137	1.20261	1.12338	1.04505	1.32363	0.880234	0.830818	1.17223	0.891001	1.42479	0.899551	1.04739	1.07063	1.01662	1.12776	1.1976	1.06313	1.15639	1.5631	1.25546	0.743871	0.855528	1.28094	0.980333	0.832342	1.21899	1.25617	1.20346	0.809901	0.532339	1.28702	1.13973
258	0.920088	1.01895	0.828017	1.11944	1.64969	1.3309	1.67673	1.26304	1.20185	1.10285	1.84508	0.888558	1.56355	1.65558	1.33619	1.19187	1.05343	1.47554	1.03401	1.26234	1.0815	1.1219	0.762241	1.27678	1.3776	0.883408	1.56331	1.33706	1.03047	1.27961	1.48195	1.00291	0.934521	1.74855	1.55001	1.14327	1.06204	1.41218	1.41059	0.985984	1.04206	1.3743	0.977243	1.76005	1.48578	1.05285	1.72774	1.21373	0.930801
259	2.05228	0.698453	1.26797	4.49035	5.34796	2.52995	2.8031	2.46317	1.64281	1.2676	1.07311	1.96172	1.42636	2.75164	2.51571	2.86919	1.57661	1.65992	13.7326	17.6478	4.67014	2.61841	7.25338	2.45458	4.80327	0.697545	0.934947	1.80442	2.53453	3.12075	1.46453	2.83963	2.02298	1.5011	1.12483	0.884152	7.92399	2.20747	2.05242	2.1433	1.98084	1.56226	11.3291	2.28813	2.09285	1.62588	4.93627	1.24894	2.32171
260	0.953766	0.637413	0.75117	0.443263	0.472366	0.495856	0.649165	0.906624	0.645424	0.521736	0.640923	0.495472	0.283524	0.508897	0.495094	0.600598	0.843905	0.580515	0.293365	0.46918	0.415747	0.645079	0.877047	0.877683	0.5723	0.573275	0.513736	0.70791	0.438392	0.39219	0.55609	0.693133	0.775485	0.608624	0.543265	0.577378	0.670408	0.454596	0.534532	0.626201	0.532608	0.641832	0.642489	0.69481	0.439533	0.547496	0.584153	0.471378	0.931446
262	1.00455	1.20613	1.09843	1.08947	1.47782	1.53766	1.05895	0.893588	1.21531	1.61475	1.57691	1.56843	1.08631	0.898238	1.04479	0.645671	1.28975	1.13776	1.25696	1.10623	1.08224	0.940062	0.762956	0.848835	1.13941	0.86804	1.39512	0.901656	0.956036	1.02627	0.732184	0.852991	1.15299	0.989477	1.07437	1.49863	1.2496	0.518329	0.634544	1.00109	0.564463	0.900941	1.22768	1.17912	1.14311	0.702786	0.515927	0.763527	1.15218
263	0.982621	0.693462	0.798054	0.514683	0.547672	0.566446	0.521759	0.887722	0.694026	0.569496	0.698429	0.593457	0.308685	0.583989	0.539892	0.677627	0.89904	0.628012	0.343624	0.53543	0.458653	0.705588	0.869935	0.868884	0.622626	0.615621	0.573765	0.71592	0.493262	0.441647	0.6186	0.71459	0.803221	0.668695	0.619913	0.660384	0.711353	0.454642	0.553271	0.708958	0.597221	0.653521	0.685257	0.732438	0.489484	0.618406	0.549299	0.493666	0.942053
265	0.914906	1.00625	0.908139	1.056	1.64471	1.46504	1.51765	1.28684	1.33184	1.08495	1.86707	0.939732	0.904066	1.25741	1.2269	1.54078	1.04717	1.71624	12.8658	12.4539	1.18851	0.91099	0.807699	1.27222	1.56171	0.925819	1.24321	1.32637	1.01266	1.68856	1.66452	1.12842	1.01182	1.55744	1.38329	0.848966	1.25149	2.09701	2.36165	1.24793	0.727627	1.37484	1.97405	1.78671	1.48295	1.80803	1.52458	1.00509	0.841624
267	0.984112	1.22639	5.81475	1.21835	1.77643	1.52756	1.69646	1.42939	23.4974	1.60033	1.7675	1.18061	1.73449	1.72558	1.64438	1.54657	1.28668	17.525	10.4962	11.8891	2.5604	1.26942	10.4776	1.54948	1.85853	1.07427	2.20815	1.60633	2.01431	3.40496	1.20893	1.75684	8.39332	2.22806	1.92922	1.58818	15.5445	23.2418	24.4973	3.0448	1.18161	1.4701	4.57071	1.83961	1.61908	2.22868	2.20081	1.44317	4.45127
268	1.00077	0.762883	0.855649	0.547223	0.619219	0.642286	0.581735	0.846928	0.718382	0.604972	0.767574	0.70039	0.360629	0.643745	0.565312	0.71679	0.960513	0.661186	0.363462	0.603268	0.510498	0.787815	0.913385	0.856818	0.651428	0.653548	0.664344	0.718577	0.548252	0.44483	0.631098	0.731176	0.843857	0.718257	0.679321	0.753887	0.752297	0.4762	0.599903	0.777713	0.618998	0.666662	0.709018	0.785882	0.569718	0.65012	0.562628	0.545717	0.961956
269	0.931395	0.664175	0.744304	0.534645	0.545706	0.528761	0.651244	0.943002	0.739546	0.625413	0.669766	0.542982	0.36962	0.513195	0.559058	0.650506	0.809869	0.637911	0.419546	0.486394	0.49599	0.643288	0.863981	0.868777	0.606078	0.606223	0.535342	0.743243	0.487857	0.503777	0.62295	0.737021	0.776609	0.649537	0.597216	0.631364	0.707676	0.567135	0.595992	0.655561	0.535247	0.695049	0.750832	0.718699	0.484574	0.558571	0.563977	0.529331	0.96504
270	1.01576	0.850534	0.908663	0.66833	0.750358	0.745172	0.636671	0.817242	0.75805	0.708929	0.84787	0.86669	0.405574	0.712274	0.63707	0.778121	1.01606	0.712646	0.424445	0.700341	0.539893	0.866274	0.939607	0.832892	0.702822	0.690234	0.804572	0.74285	0.62973	0.490041	0.678265	0.755234	0.872406	0.773536	0.783674	0.891071	0.827114	0.562467	0.662975	0.862111	0.683391	0.679775	0.756126	0.849601	0.675845	0.687285	0.524751	0.619262	0.979457
272	1.03818	0.961084	0.959087	0.822121	0.916099	0.855521	0.73991	0.785338	0.800029	0.849096	0.938381	1.04151	0.485401	0.761643	0.740317	0.841571	1.06976	0.779078	0.500861	0.801444	0.59339	0.969284	0.973152	0.797943	0.756099	0.731987	0.962951	0.743658	0.748282	0.566146	0.715937	0.778306	0.914373	0.832812	0.897738	1.06275	0.902552	0.649836	0.73655	0.951611	0.754817	0.704012	0.826758	0.894284	0.810538	0.730231	0.534725	0.709804	0.984416
273	0.993037	0.898823	0.745872	0.734705	0.777861	0.631625	0.681821	1.10452	1.00899	0.9338	0.84525	0.633901	0.589831	0.677054	0.740954	0.623945	0.846096	0.887388	0.937779	0.915002	0.826937	0.68276	0.7255	0.868034	0.731474	0.857313	0.625184	0.986794	0.512061	0.693763	0.591725	0.819984	0.938642	0.869655	0.770599	1.00306	0.853727	0.467961	0.595857	0.712981	0.456317	0.951912	1.1128	0.899392	0.681736	0.676821	0.727589	0.579517	0.982898
274	0.875725	0.872023	0.878148	0.779946	0.754	0.81199	0.795001	0.805159	0.820131	0.772587	0.75253	0.711035	0.757732	0.895583	0.755008	0.866376	0.928876	0.738959	0.601871	0.795153	0.7341	0.756073	0.814843	1.05147	0.807294	0.863555	0.882836	1.02961	0.754363	0.566027	0.809122	0.775721	0.731192	0.747289	0.784353	0.769395	0.783081	0.923542	0.804773	0.827012	0.665982	0.889227	0.779646	0.769519	0.785896	0.77784	0.800197	0.741498	0.836587
275	0.795091	0.887439	0.853665	0.832609	0.818862	0.844714	0.848198	0.770348	0.871229	0.812864	0.775252	0.676908	0.776699	0.884126	0.838463	0.88549	0.902971	0.794445	0.670545	0.825664	0.80357	0.776491	0.871303	1.00317	0.855811	0.857882	0.935025	1.06332	0.804129	0.595756	0.82614	0.759165	0.726516	0.726185	0.835451	0.79714	0.825073	1.1671	0.962866	0.81653	0.699081	0.872776	0.791818	0.768331	0.856088	0.705332	0.836315	0.812495	0.848785
276	1.03022	0.968558	0.862307	0.791743	0.872426	0.894895	0.601584	1.04636	0.947469	0.944233	0.954257	0.801376	0.743511	0.72375	0.732182	0.568014	0.965399	0.93156	1.15418	1.12889	0.946807	0.668119	0.702337	0.928235	0.787154	0.899708	0.805767	0.967387	0.607087	0.73939	0.589628	0.747893	1.01298	0.882946	0.799494	0.993982	0.971081	0.464126	0.539922	0.724112	0.382421	1.00526	1.16308	0.979047	0.827732	0.614227	0.573904	0.613513	1.08952
277	0.890171	0.891758	0.879063	0.741461	0.760197	0.815007	0.773622	0.841688	0.863005	0.776107	0.78418	0.788564	0.802232	0.906166	0.841652	0.882012	0.957077	0.755329	0.656952	0.792483	0.774083	0.787633	0.842614	1.06842	0.854845	1.00933	0.963733	1.07273	0.75223	0.592917	0.852294	0.810431	0.746433	0.778088	0.836625	0.845979	0.798939	0.822135	0.761131	0.87222	0.66155	0.917638	0.820253	0.810671	0.780802	0.961173	0.892026	0.776627	0.856393
278	0.830046	0.869116	0.864573	0.807837	0.796399	0.822796	0.828502	0.79385	0.83675	0.79424	0.767386	0.70602	0.735541	0.882274	0.778312	0.868225	0.918427	0.749189	0.629123	0.788887	0.757968	0.748573	0.853253	1.03931	0.833905	0.862756	0.911834	1.05387	0.781869	0.560436	0.824875	0.775199	0.712511	0.733073	0.803884	0.773308	0.773339	0.972611	0.852984	0.808879	0.660851	0.893745	0.778854	0.773089	0.832457	0.759796	0.82982	0.732244	0.833388
279	0.911806	0.813271	0.732219	0.63373	0.639663	0.548224	0.650769	1.01926	0.875074	0.835748	0.741163	0.611359	0.506578	0.520765	0.720872	0.737652	0.793268	0.774151	0.682415	0.676991	0.637574	0.698502	0.841307	0.826475	0.621764	0.737421	0.611762	0.86281	0.539447	0.681062	0.690564	0.841934	0.828108	0.755123	0.73153	0.756569	0.810564	0.638814	0.637664	0.703193	0.528852	0.817199	0.924802	0.784147	0.539093	0.59637	0.585496	0.606289	0.928799
280	1.1424	1.16124	1.00998	1.19871	1.21403	0.99371	0.900089	0.800073	0.864709	1.14004	1.16019	1.32723	0.661744	0.753975	0.847451	0.954554	1.16574	0.902228	0.612902	1.01931	0.642819	1.09501	0.994585	0.753408	0.856866	0.809827	1.3195	0.742122	0.974728	0.715219	0.752066	0.838855	1.03842	0.941418	1.08473	1.44249	0.963795	0.829767	0.844336	1.08341	0.871191	0.775179	0.987176	0.949396	1.01201	0.793544	0.50273	0.86974	0.994616
281	0.930031	0.903783	0.895936	0.709507	0.734388	0.775843	0.77482	0.903989	0.880988	0.785188	0.774169	0.802031	0.811132	0.894377	0.798673	0.874484	0.982614	0.793642	0.655009	0.762957	0.746999	0.817433	0.90514	1.08263	0.821069	1.0399	0.982431	1.08065	0.712874	0.640991	0.838194	0.838425	0.781079	0.798505	0.826655	0.849066	0.804789	0.724086	0.713777	0.881052	0.65755	0.917872	0.819661	0.807714	0.741343	0.986253	0.877579	0.736301	0.902071
282	0.948839	0.865564	0.755479	0.719386	0.725539	0.587916	0.564672	1.04915	0.916547	0.887606	0.797327	0.594659	0.468396	0.597502	0.724016	0.657984	0.814783	0.868324	0.828241	0.827757	0.717704	0.62176	0.803302	0.827236	0.708287	0.805294	0.639744	0.93761	0.561396	0.685362	0.640427	0.787118	0.896037	0.818127	0.773833	0.837841	0.864853	0.576328	0.612776	0.705961	0.42111	0.92824	1.04743	0.853217	0.623875	0.549887	0.633014	0.581048	0.941668
283	1.07715	1.07674	0.985585	0.993075	1.07815	0.945135	0.823758	0.779923	0.83383	0.988447	1.03159	1.19818	0.584165	0.781648	0.794248	0.911552	1.12849	0.847728	0.556891	0.917358	0.635306	1.05285	0.986735	0.774472	0.816404	0.77282	1.16191	0.729892	0.865522	0.634352	0.740863	0.80314	0.97573	0.89609	1.01862	1.24354	0.945212	0.757522	0.791121	1.02534	0.825188	0.737106	0.894146	0.920223	0.93611	0.76367	0.499305	0.79357	0.99583
284	0.950518	0.853032	0.752459	0.664811	0.696279	0.591303	0.58648	1.08013	0.992661	0.901412	0.797788	0.596483	0.488768	0.644723	0.671148	0.616712	0.833574	0.865097	0.882435	0.832464	0.775782	0.61072	0.711637	0.888437	0.723581	0.827435	0.584071	0.973936	0.558218	0.66462	0.562808	0.766672	0.890102	0.833879	0.743431	0.88909	0.878137	0.522861	0.565943	0.707949	0.380712	0.929453	1.09998	0.876143	0.662496	0.622501	0.648427	0.533672	0.969206
285	0.759218	0.825812	0.787314	0.836931	0.748832	0.739115	0.860096	0.782214	0.723792	0.738673	0.71328	0.463294	0.576934	0.820556	0.504267	0.798619	0.824151	0.807964	0.550762	0.714452	0.559007	0.594792	0.841922	0.942781	0.754159	0.78415	0.806169	0.99637	0.698299	0.547209	0.730322	0.633363	0.646396	0.645458	0.759021	0.683114	0.633583	0.974115	0.839356	0.667909	0.570502	0.815323	0.68735	0.707527	0.772993	0.443364	0.860635	0.511417	0.696629
286	0.974445	0.853851	0.863754	0.670579	0.701833	0.766326	0.718441	0.919704	0.855505	0.74446	0.766384	0.689634	0.878905	0.909773	0.744238	0.885289	0.968625	0.776742	0.642533	0.765351	0.693445	0.838192	0.88774	1.08469	0.780141	1.08399	0.914909	1.142	0.671793	0.559523	0.849164	0.866519	0.74842	0.809736	0.774638	0.869739	0.795821	0.67926	0.686451	0.848915	0.639641	0.929219	0.796713	0.816533	0.635325	1.02424	0.943137	0.676351	0.94095
287	0.992006	0.855605	0.878727	0.704928	0.711358	0.760348	0.73477	0.942874	0.833717	0.728456	0.715237	0.758115	0.819705	0.862177	0.737206	0.835393	1.04876	0.811837	0.58329	0.717822	0.731732	0.776845	0.849323	1.04391	0.761418	0.936002	0.948225	1.04566	0.660781	0.643528	0.838797	0.810071	0.741983	0.838388	0.774991	0.862468	0.748072	0.687581	0.687471	0.829732	0.622008	0.933009	0.775645	0.747932	0.643345	0.902426	0.863717	0.686722	0.941227
288	0.789515	0.852528	0.842523	0.833347	0.766758	0.787223	0.895236	0.779502	0.727639	0.755917	0.713813	0.515427	0.644434	0.850369	0.582207	0.824298	0.864072	0.74023	0.580555	0.741613	0.601592	0.684434	0.76677	1.02002	0.752846	0.798308	0.84089	1.00675	0.717395	0.51692	0.75982	0.690303	0.661294	0.665379	0.784989	0.687107	0.665931	1.04222	0.858278	0.71216	0.630236	0.849254	0.692857	0.711952	0.788499	0.499016	0.833971	0.550914	0.724945
289	1.16957	1.19781	1.02688	1.28191	1.23271	0.980143	0.925453	0.806341	0.849876	1.22241	1.25482	1.33745	0.692496	0.710954	0.801536	0.959746	1.15654	0.887242	0.600208	1.04688	0.597467	1.07471	0.98341	0.765771	0.880899	0.85593	1.38679	0.778931	1.02052	0.694459	0.738827	0.856004	1.05551	0.929366	1.06858	1.61041	0.951397	0.817374	0.840999	1.03428	0.82295	0.796122	1.0283	0.982527	1.01181	0.778668	0.496917	0.840866	0.980382
290	0.786859	0.823394	0.777859	0.915604	0.778333	0.737933	0.869327	0.764736	0.720625	0.79198	0.732098	0.446143	0.546085	0.793187	0.504832	0.810755	0.813611	0.883597	0.604219	0.755573	0.568324	0.628708	0.882467	0.885564	0.774699	0.735425	0.822936	0.950634	0.740664	0.612697	0.721684	0.5993	0.665728	0.650098	0.783077	0.736729	0.651276	0.839085	0.842553	0.669762	0.600937	0.790287	0.722669	0.715233	0.811567	0.411159	0.875741	0.574529	0.722242
291	1.25574	0.909628	2.60386	0.979084	0.885413	0.939297	1.3898	1.10189	2.20749	1.99496	1.27573	1.82054	1.18702	1.21632	2.5798	2.32495	1.98814	0.79052	1.61998	2.22301	0.907475	0.632929	1.46697	0.852615	0.55415	0.868314	0.97949	1.06377	2.55323	0.637635	1.33499	2.00842	1.40269	1.11866	1.00616	1.38762	0.967037	3.77626	3.90029	2.28587	1.10194	0.909076	1.00981	0.96821	0.864734	1.07419	1.77527	1.09925	1.18729
292	1.23559	1.01174	0.973159	1.10633	0.934121	0.856137	1.09881	1.75351	1.07335	0.809244	0.979544	1.04592	0.967804	1.08826	1.42536	1.09313	1.08062	0.929919	0.930853	1.00641	1.09446	1.26142	1.36526	1.03915	1.07295	1.32406	0.786927	1.44674	0.896871	1.02558	1.24558	1.05056	1.13328	0.945116	1.02703	0.982725	0.848672	1.07517	1.006	1.2921	1.27406	0.829547	1.09625	1.24765	1.15343	1.53845	1.47833	0.879108	1.13123
293	0.952878	0.942753	0.908279	0.844679	0.815838	0.765532	0.772574	0.88568	0.827872	0.856016	0.959093	0.785368	0.672732	0.760823	0.627339	0.897055	0.942998	0.739247	0.583476	0.840007	0.595684	0.822626	0.91165	0.95283	0.772405	0.972722	1.0099	1.0498	0.749526	0.570676	0.77367	0.885368	0.828142	0.764574	0.808671	1.14295	0.777221	0.587021	0.639998	0.803138	0.618813	0.849384	0.859897	0.854628	0.712474	0.826857	0.812809	0.604938	0.888792
294	1.00811	0.833411	0.913043	0.695013	0.709528	0.722495	0.713471	1.00136	0.846108	0.757296	0.813437	0.736441	0.691785	0.841548	0.65981	0.879718	0.994575	0.830348	0.63598	0.751378	0.685393	0.821119	0.896365	1.03672	0.741939	1.06946	0.88418	1.13796	0.661543	0.542143	0.812073	0.868098	0.7775	0.842878	0.772665	0.910485	0.76773	0.650067	0.672121	0.790552	0.627902	0.918261	0.77794	0.810788	0.612279	0.914544	0.888043	0.646807	0.955227
295	1.05788	1.05041	0.988933	1.1059	1.06098	0.880091	0.893712	0.85292	0.852521	1.09145	1.16556	1.08809	0.69045	0.728866	0.764118	0.906584	1.05626	0.856147	0.633526	0.966706	0.573949	0.986327	0.942519	0.852218	0.837089	0.889517	1.20657	0.896266	0.943836	0.644396	0.777053	0.854092	1.00137	0.835653	0.974933	1.47631	0.876239	0.755664	0.785148	0.941909	0.754989	0.799519	0.964123	0.935698	0.860709	0.779457	0.633517	0.786729	0.94086
297	0.827356	0.84461	0.767503	1.05318	0.82422	0.751128	0.980511	0.754283	0.718585	0.852561	0.78032	0.472915	0.590394	0.787004	0.520386	0.871265	0.815451	0.999507	0.664461	0.798085	0.568436	0.607496	0.956293	0.80747	0.81714	0.714875	0.90168	0.917694	0.832063	0.714623	0.722128	0.637411	0.694306	0.661886	0.837713	0.830015	0.654374	1.04492	0.87691	0.704635	0.587489	0.777176	0.776773	0.740839	0.867045	0.426539	0.885927	0.669433	0.725695
298	1.74491	0.759406	0.897436	1.54612	1.01659	1.93198	1.48689	1.44754	1.21395	0.900098	0.678196	0.951923	1.61654	1.60438	1.35876	0.948596	1.18447	1.59241	1.30808	1.39482	1.67594	2.44632	1.26396	1.43343	1.24818	0.63462	0.591182	1.26517	2.08063	1.33472	1.45739	2.25369	1.15776	1.49329	0.577227	2.26083	1.01278	1.23609	2.04903	1.77825	1.69478	1.38949	1.57829	1.13949	1.06582	2.41529	1.69063	1.11325	1.12878
299	1.29064	1.0443	1.03141	1.46682	1.35251	0.999015	1.23228	1.70212	1.05868	0.854276	1.07045	1.32881	1.20455	1.33845	1.59935	1.57344	1.07232	1.18403	1.07452	1.14985	1.24941	1.38041	1.30789	1.28724	1.14654	1.22153	0.943126	1.62474	1.05906	1.17434	1.55214	1.16741	1.16135	0.918193	1.28959	0.992931	1.03805	1.03706	1.1312	1.30596	1.23946	0.914162	1.19113	1.55302	1.37749	1.3398	1.31523	0.645523	1.2325
300	1.2571	1.2684	1.06759	2.23004	1.86402	1.47175	1.89551	1.07079	1.28886	1.25966	1.09289	1.834	1.33769	1.43814	1.77959	1.86821	1.42579	1.53701	1.64513	1.74185	1.34971	1.60524	1.79688	1.51189	1.25828	1.44322	1.10756	1.99563	1.76841	1.37999	2.06701	1.78219	1.1864	1.02211	1.13311	1.04471	1.14224	1.63182	2.08195	2.02376	1.63625	1.34904	1.49893	1.84351	1.86944	1.23017	1.25775	1.60914	1.32615
301	0.940384	1.61972	0.974594	2.69962	2.07001	2.64391	1.66679	1.08394	1.0878	1.03627	1.01732	1.15762	1.54053	1.4119	1.38974	2.40101	1.18526	1.5298	1.42725	1.51748	1.11204	2.10466	1.87705	1.67125	1.09925	1.47035	1.2003	1.70138	1.8431	1.26295	2.2062	2.63027	1.2482	0.948673	1.27391	1.3085	1.0137	1.46183	2.00004	2.01212	2.33175	1.34482	1.20678	1.68537	1.42547	1.05668	1.47283	1.24669	1.15012
302	1.13799	1.07187	0.943265	1.04134	0.881285	0.780367	1.12584	1.50634	1.13657	0.834937	0.910898	1.08373	0.872752	1.2511	1.50362	1.1165	1.00202	0.891621	0.809235	0.885997	1.07872	0.867018	1.39743	0.933591	0.987682	1.28081	0.745626	1.25143	0.878719	0.818587	0.98074	0.945539	1.01076	0.906563	1.02663	0.945218	0.9095	0.953105	0.884522	1.12861	0.871987	0.735582	1.0691	1.0794	1.01334	1.47217	1.47524	0.740552	1.02839
303	1.60692	0.923148	3.68419	3.10089	2.72991	1.43336	1.00254	1.9285	7.3416	2.05277	1.3078	1.34228	1.57744	1.20576	1.26601	2.6697	1.24589	9.09133	10.6898	12.6386	2.95021	0.621752	4.58331	1.49542	3.71612	0.853171	2.34297	2.43188	12.2414	2.23769	0.68028	2.11154	9.93431	1.57651	2.15871	0.996424	22.5512	1.73341	1.0974	2.18839	0.677914	2.72536	11.948	1.3429	1.7454	1.42333	4.88416	0.671099	1.35995
304	0.87523	0.91294	0.772588	1.20881	0.917056	0.732602	1.11177	0.764287	0.732848	0.950169	0.859027	0.55429	0.663406	0.731151	0.651761	1.03786	0.810649	1.13895	0.76749	0.887072	0.624944	0.603821	1.00965	0.739689	0.863536	0.699082	1.08342	0.891054	0.941297	0.854679	0.714821	0.821057	0.718281	0.683173	0.92446	0.964513	0.693819	1.17579	1.00318	0.764974	0.567809	0.787194	0.861981	0.772842	1.01305	0.459454	0.892616	0.786201	0.725717
305	1.05745	1.03113	0.847534	1.22668	0.972359	0.879404	1.24675	0.831757	0.832675	1.10707	0.945074	0.862771	1.08015	0.880283	0.894346	1.16783	0.919119	1.34841	1.01529	1.03322	0.898366	0.753258	1.08732	0.74629	0.931056	0.743087	1.35178	0.873534	1.07801	0.986745	0.819355	0.986682	0.82447	0.806617	1.06875	1.15576	0.72927	1.20398	1.08773	0.920366	0.576755	0.883867	1.04536	0.87559	1.20112	0.607426	1.01732	0.779056	0.819439
306	1.18603	1.09998	1.01191	1.10203	0.897562	0.869502	1.23945	1.41248	1.19306	1.10127	0.995321	1.18968	0.892337	1.27957	1.45569	1.19494	1.1395	0.840831	0.806495	0.869626	0.990577	1.03412	0.979271	0.877405	1.05472	1.23016	0.88876	1.3491	0.927726	0.867851	1.15036	1.08803	1.06411	0.959814	1.18457	1.09757	0.916852	1.123	1.04871	1.0707	1.06001	0.710062	1.16171	1.16148	0.989865	1.47701	1.48982	1.06951	1.01646
307	1.32033	1.27716	2.11324	1.19748	1.17171	1.22633	1.69231	1.13152	1.43076	1.02825	0.985798	1.27219	1.78055	1.02489	1.32297	1.21051	1.21806	1.4171	17.7091	19.1066	3.64902	1.34893	0.579558	1.26599	1.17059	1.5227	1.23893	1.65061	1.33429	1.26063	1.04932	0.940532	1.37411	1.03586	1.16097	1.36791	1.58291	4.96693	2.73656	0.905472	1.10275	1.47571	1.14408	1.06611	1.07283	1.00027	1.24808	1.25329	2.31624
308	3.12476	1.2029	10.0754	3.56144	3.43122	2.81652	1.07494	2.28156	1.23447	1.10227	1.32523	2.81161	1.96256	2.75825	3.26423	0.775389	2.53593	3.27753	4.37247	4.23582	3.19442	2.82403	1.23277	1.63319	11.457	1.19179	1.52876	1.91439	2.76728	1.72644	0.982175	0.779201	2.42435	1.66061	1.29199	1.46534	3.93231	1.56835	1.98175	2.56551	2.49596	2.14926	4.02071	2.03896	2.18957	2.08908	1.66991	0.764012	2.16177
309	1.56709	1.21979	1.03514	1.33291	1.39506	1.10921	1.12107	1.17613	1.10635	0.962863	1.02731	1.36082	1.18551	1.2879	1.24027	0.979634	1.21636	2.08265	0.834367	0.942315	1.37084	0.700804	1.15213	1.27835	2.20994	1.19312	1.33111	1.17653	1.48774	1.05792	1.00835	0.927333	0.884484	1.37486	1.08503	1.15643	1.1435	0.9792	0.879391	1.15306	0.73182	1.36796	1.21778	1.0319	1.46714	1.22622	1.47788	0.831342	0.990261
310	1.32721	1.32361	0.952569	1.1347	1.10431	1.17955	1.1471	1.18498	1.01082	1.16142	1.13148	1.30141	0.989078	1.16964	0.70782	0.887287	1.06431	1.88599	0.791232	0.922042	1.44482	0.699758	0.999153	1.38274	0.853601	1.25503	1.30135	1.14113	1.19848	1.0937	0.923153	0.861858	1.05558	1.34175	1.10136	0.997179	1.08132	0.756965	0.996788	0.795736	0.684663	1.35101	1.18534	1.03552	1.02506	1.15275	1.40888	0.940425	0.975483
311	1.45241	0.81788	1.07352	4.38145	3.97837	2.39928	0.831398	1.20462	5.38025	1.48	1.2677	1.77578	1.55546	2.47072	2.03855	1.89802	2.00831	4.19564	3.81772	4.22799	3.21158	2.07195	0.590387	3.23071	4.42913	1.06223	3.75842	1.52321	6.54311	1.84512	1.44044	2.70665	2.6145	1.91044	3.20694	0.954665	11.0725	1.7085	1.11095	9.01675	1.56514	1.87719	21.6456	1.41144	2.46054	1.72335	2.071	0.857893	3.48371
312	1.20319	1.11431	1.15576	1.19363	1.2152	1.07853	0.988609	1.20101	0.904478	1.06194	1.0445	1.2369	1.19434	1.24108	0.936436	0.959563	1.12659	1.4573	0.855912	0.936814	0.987847	0.764188	0.870428	1.33159	1.11768	1.16693	1.09162	1.12356	1.05259	1.00185	0.979079	0.890347	1.1675	1.38145	0.965258	1.17663	1.14677	0.689117	0.804658	0.674445	0.838365	1.35045	0.921767	1.04741	1.0192	1.2227	0.882126	0.908585	1.0094
313	1.88388	0.855462	10.0039	1.86083	1.7397	1.42341	3.79721	1.59869	22.9191	2.23898	1.25607	0.605385	1.54377	3.12666	1.15998	1.38258	1.82055	16.8183	39.6858	43.8317	2.77907	1.00203	6.35343	1.59443	4.15103	0.678638	1.12971	1.61543	1.28296	4.6249	1.5496	1.53739	22.0163	1.94476	1.30243	1.35968	13.9431	0.751074	0.492113	1.33156	1.21732	1.35717	5.35213	1.15787	1.14882	1.08755	1.61216	1.50044	4.95662
314	1.98503	0.399028	0.117218	1.37648	1.95648	1.27677	1.75359	0.351606	0.13739	0.155127	0.16819	0.207235	1.57212	0.213542	1.33023	0.190003	0.290433	0.627813	1.03617	0.117828	2.56258	2.01597	0.338755	0.834491	0.125428	0.095176	0.0689372	0.639159	2.39196	0.178487	1.21057	2.03993	0.341936	0.355205	0.0629108	0.318228	0.131928	1.46303	1.71625	1.92127	1.30497	1.29614	0.113125	0.476814	0.234306	0.237182	0.212576	1.29407	0.184939
315	1.83989	0.433768	0.0660851	1.74236	2.63058	1.94731	1.83354	0.292922	0.197444	0.212926	0.178885	0.267375	1.91756	0.266364	1.72595	0.264342	0.390876	0.787842	1.32733	0.149983	3.0422	1.50012	0.422385	0.823685	0.128358	0.0834665	0.106911	0.585615	2.48298	0.246841	1.36415	1.56744	0.370199	0.373189	0.0911867	0.316952	0.116831	1.5455	1.81998	1.80289	1.52118	1.64054	0.119757	0.531271	0.186416	0.244552	0.17077	1.37993	0.215445
316	1.69437	0.927076	7.47073	1.72352	1.63231	1.37525	2.51383	1.77697	18.2799	1.71884	1.20148	1.38224	1.21604	1.84264	0.726355	2.13823	1.63444	16.2252	35.8948	41.0616	2.63763	0.988197	4.22575	1.70749	1.31082	0.675851	1.3557	1.72707	1.82895	4.60794	1.86695	2.33656	36.7735	2.06313	1.19718	1.63197	23.776	1.28873	1.38707	1.73548	1.28643	1.68958	3.78737	1.15307	1.22869	1.09635	1.28349	1.38838	10.5635
318	1.30026	1.44627	1.37703	1.1465	1.1732	1.07832	1.09117	1.42577	0.956681	1.04309	1.10662	1.3134	1.1323	1.20826	0.942657	0.973525	1.23145	1.60697	0.519509	0.778813	0.891224	0.836282	1.12934	1.54978	1.17442	1.34501	1.18804	1.22287	0.721172	0.924567	1.10229	0.886525	1.24519	1.56243	0.987197	1.0533	1.14174	0.708967	1.08571	0.821101	0.829975	1.29745	0.904057	1.03615	1.11837	0.877574	1.19664	0.874156	0.958563
319	0.936879	1.15858	1.09343	1.12353	1.32007	1.37349	1.16697	0.97892	1.14527	1.28546	1.33339	1.44337	1.06552	1.00225	1.21355	1.07033	1.15428	1.0925	1.1339	1.10103	1.0159	1.29257	1.06287	0.865511	1.19142	0.953767	1.11044	1.06276	1.14269	0.941601	1.20391	1.12188	0.933877	0.952854	1.02548	1.22	1.05636	1.18595	1.11481	1.24501	1.03545	0.724946	1.21152	1.12058	1.0973	1.11477	0.840308	1.28394	0.988733
321	1.25917	1.24875	1.11021	0.918059	0.863446	0.993496	0.911733	1.25569	0.876805	1.11801	1.05754	1.04357	1.07539	1.09487	1.15246	0.827227	1.47387	1.30474	0.58549	0.808333	0.783286	0.763878	0.80782	1.25273	1.23344	1.15801	0.971173	1.25313	0.810476	1.00321	0.999764	0.805329	1.00825	1.31594	0.906823	1.13127	1.09591	0.675333	0.871535	0.942209	0.718654	1.22418	0.940129	1.06156	1.20068	0.884207	1.40702	0.854222	0.96673
322	1.83079	0.661582	0.240161	1.75321	2.38775	2.07787	1.57211	0.502668	0.314339	0.275407	0.262285	0.361563	2.00372	0.42605	1.58831	0.704574	0.622446	0.949124	1.51792	0.209229	3.60174	1.07028	0.541864	0.869544	0.306019	0.62018	0.267898	0.661831	2.14405	0.33111	1.31989	1.56353	0.515815	0.510565	0.295937	0.419783	0.204602	1.39698	1.70446	1.38989	1.25769	1.83364	0.28525	0.616289	0.355181	0.531837	0.438725	1.0509	0.442051
323	1.05706	1.10851	0.969307	1.17273	1.09228	1.0003	1.13618	1.11843	1.03165	0.965494	0.934119	1.06643	0.904407	1.02918	1.05949	1.00052	0.890124	0.903481	1.18309	1.0818	1.01189	1.14632	0.997336	0.905899	1.06332	0.953341	0.903345	1.11706	1.1049	0.925278	1.1545	1.00871	0.909039	1.05279	0.909822	1.00186	0.997503	0.84757	0.942873	1.11073	0.894932	0.790831	1.09561	1.08094	1.0348	1.27913	1.21635	1.20604	0.972897
325	1.7611	0.911131	0.407913	1.66307	2.21293	1.81997	1.39507	0.71665	0.477776	0.450462	0.382043	0.502111	1.93289	0.640074	1.42375	0.864791	0.831382	1.00912	1.55299	0.32457	3.07853	1.10357	0.917454	0.872861	0.495766	1.13837	0.434441	0.737413	1.83869	0.421406	1.15634	1.14856	0.683972	0.644036	0.57077	0.553909	0.303846	1.04854	0.997911	1.30127	1.22232	1.71315	0.458199	0.71789	0.598573	0.637471	0.590367	1.18566	0.683923
326	1.49088	1.16626	8.22202	1.45684	1.40962	1.41978	1.69153	1.21399	1.02676	1.26685	1.09184	1.15166	1.26401	1.6957	1.3606	1.12178	1.33123	5.61419	25.4365	26.9702	4.58829	0.928308	1.76717	1.35471	1.54906	1.18601	1.16115	1.40106	1.1729	3.11764	0.918509	1.11263	24.5206	1.43998	1.08655	0.986369	5.4543	3.36651	2.67699	1.23623	0.749198	1.45128	1.16103	1.07469	1.01362	1.32772	1.28239	1.19695	16.0998
327	1.20708	1.12423	1.004	1.28499	1.2279	1.12579	1.15438	1.09434	0.830937	0.997918	0.898319	1.21046	1.03216	1.20584	1.12424	1.03916	0.962198	1.02368	1.18902	0.99613	1.01768	1.25203	0.920115	0.914329	0.960298	1.00344	0.888316	1.18991	1.04002	0.906679	1.23063	1.03307	1.03837	1.05895	0.984177	0.923363	0.894712	0.879921	0.928529	1.17444	0.938969	0.762993	1.11654	1.00226	1.10724	1.42938	1.12885	1.24764	0.980573
328	1.2375	1.11562	1.05352	1.24214	1.03864	1.01592	1.24975	1.13534	0.857879	1.08045	0.854782	1.25666	0.902825	1.19465	1.11754	1.07386	0.948969	1.07772	1.20984	1.08257	0.938795	1.22677	0.748258	0.823895	0.895087	0.977949	0.755689	1.16474	1.11298	0.967175	1.14591	1.05792	1.14582	1.04355	0.931997	0.967213	0.950436	0.863286	0.952876	1.25273	0.95279	0.885557	1.11403	0.969067	1.10152	1.26771	1.22723	1.18422	1.15816
330	1.67434	1.04109	0.540082	1.67576	2.26317	1.94815	1.37205	0.815535	0.626471	0.651113	0.460125	0.697359	2.04364	0.606185	1.29789	0.976745	1.01351	1.03568	1.53993	0.42662	3.02958	1.13077	1.0025	0.873092	0.619865	1.42558	0.627101	0.809041	1.79325	0.509039	1.16064	1.0866	0.896157	0.726058	0.796193	0.802111	0.398049	1.0655	0.919957	1.24485	1.20561	1.63827	0.644843	0.811083	0.729091	0.768869	0.567627	1.20888	0.809866
332	1.31047	1.11245	0.79852	1.35893	1.28532	1.05978	0.974937	1.6392	0.953328	1.00121	1.17074	0.989736	0.919254	1.14297	1.20425	0.775962	1.36981	1.56454	0.860485	0.797822	0.847239	0.631435	0.617426	1.28967	0.962587	1.23255	1.06474	1.16874	0.787959	1.07301	1.03028	0.766702	0.585151	1.2198	0.940491	1.09608	1.02866	0.758118	0.901358	0.881284	0.84072	1.93788	1.05308	0.872086	1.56876	0.823492	1.20185	0.867349	0.92228
333	1.27913	0.946971	0.699442	1.20777	1.16013	0.803769	1.35116	1.39157	0.967872	0.981349	1.06732	1.21943	0.725704	0.747511	1.13822	0.946949	1.17802	1.93928	6.46673	6.27815	1.05424	0.740324	0.597373	1.07504	1.04451	1.06	1.07676	1.12731	0.982072	1.60436	1.01231	0.88178	0.61751	0.815333	1.08466	0.79941	0.967229	1.38847	1.41371	0.850488	0.55836	0.938553	1.12514	0.972269	0.960969	0.536141	1.27907	1.0692	0.827571
335	1.4036	1.14406	0.719395	1.24464	1.19159	0.980117	0.980622	1.28965	0.956003	1.46004	1.0891	0.928859	1.00039	0.961103	1.10227	0.899239	0.991117	1.91644	1.1165	0.698835	0.910303	0.689118	0.78383	1.32593	1.01099	1.30775	1.06081	1.36061	0.852673	1.11352	0.88277	0.932969	0.631084	0.96605	1.07608	0.800258	0.960164	1.0913	0.804444	0.975901	0.567978	0.871921	0.879947	0.859619	1.36479	0.973296	1.40199	0.838037	0.822454
336	0.864502	1.16138	0.986985	0.692369	0.721505	0.752426	0.878791	0.882986	0.755669	0.751742	0.889773	0.900531	0.668848	0.800764	0.766448	0.889141	0.937162	0.862852	0.88372	0.910654	0.833668	0.986041	0.815277	1.00435	0.902621	0.80095	0.934183	0.855933	0.751834	0.91685	0.943884	0.942601	0.987139	0.974864	0.954553	0.939186	1.03618	0.996409	0.807647	0.969071	0.853062	0.866461	0.998718	0.9128	0.765706	0.812444	0.671477	0.819096	1.12083
337	1.59198	1.15175	0.772027	1.52928	2.0164	1.85671	1.21638	1.02256	0.842147	0.900243	0.714941	1.01493	2.03737	0.868203	1.1866	1.21187	1.21542	0.984828	1.41422	0.611077	2.35765	1.13858	1.01719	0.842718	0.822891	1.33058	0.803004	0.924294	1.59213	0.662072	1.16301	1.06769	1.02185	0.842328	0.917008	1.05523	0.600469	1.07645	0.873064	1.19594	1.20733	1.27774	0.96064	0.946522	0.997666	0.932689	0.689855	1.2178	0.955666
339	1.12427	1.0688	1.10245	1.28459	1.30943	1.27331	1.02121	1.44391	1.23512	1.05212	1.11982	1.15449	1.04655	1.25943	1.1401	0.927534	1.33768	1.18178	0.714788	0.961884	0.92444	0.660454	0.685622	1.15203	1.00812	1.10012	1.16514	1.32858	0.975614	0.986026	1.06376	0.790445	0.894972	1.29497	1.1342	1.19325	1.23902	0.948574	0.972746	1.06632	1.03349	1.338	0.835531	0.964131	1.4445	1.29501	1.19222	1.04054	0.898111
340	1.20816	1.16177	1.23003	1.24605	1.16931	1.25437	1.27351	1.26446	1.33538	0.878732	1.06262	1.37208	1.05073	1.47552	1.54917	1.28504	1.06301	1.44647	1.23997	1.10149	0.975954	1.07528	0.724341	1.36206	1.06678	1.33392	1.04384	1.28784	1.25159	0.997991	1.40881	1.3342	1.07602	0.954671	1.09763	1.0183	0.913188	1.76086	1.40441	1.29123	1.2162	1.25782	0.341848	0.987453	0.97789	1.5134	1.5434	1.30722	1.22536
341	1.15679	1.08304	1.00373	1.23648	1.053	1.15188	1.13883	1.08147	0.940312	1.11734	0.93257	1.18103	0.942798	1.17135	1.13358	1.12588	0.857687	1.12605	0.9938	0.980871	0.95382	1.32917	0.939274	0.790592	0.913588	0.979289	0.740526	1.13701	1.10291	1.09058	1.21725	1.06061	1.07334	0.862536	1.07041	1.00642	0.988048	1.07797	1.04518	1.32366	1.06978	1.00509	1.1751	0.919503	1.02464	1.30143	1.13925	1.18347	1.14885
343	1.21525	1.32699	1.50541	1.30815	1.34402	1.40595	1.48651	1.13486	1.57284	1.20767	1.05167	1.22234	1.0666	1.43151	1.13053	1.29953	1.10754	0.753575	7.87464	9.10199	2.01882	1.03731	0.904229	1.39611	1.29496	1.58337	1.21714	1.37459	0.996987	1.25671	1.10788	1.36678	0.969866	1.16622	1.17929	2.35379	2.18584	3.30138	1.66171	0.890597	1.1208	1.46689	0.898845	1.10705	1.14773	0.816393	1.708	1.27987	1.15436
344	1.15917	1.05529	0.952511	1.16366	1.04729	1.0125	1.21546	0.935473	1.00572	1.10005	1.06985	1.1116	0.876149	1.31317	1.25021	1.1154	0.886313	1.16273	1.24495	1.03412	0.8109	1.1489	0.805237	0.764323	0.994277	0.933495	0.815517	1.01744	1.23991	1.31554	1.08673	1.02037	1.0688	0.882928	1.06544	1.12826	1.00722	1.03457	0.91317	1.25698	1.10515	0.952256	1.23764	0.970609	1.04654	0.937563	0.980981	1.1947	0.977152
345	0.674055	1.05025	1.09333	0.767245	0.860896	0.818319	1.06526	1.05579	1.01812	0.900505	0.953071	1.04338	0.936566	1.04161	0.946697	1.13658	0.992678	0.679789	1.01243	0.801278	1.1118	1.28915	1.12736	1.08909	1.0191	1.19746	1.15073	0.989165	0.857371	0.771929	0.97533	1.22973	0.796752	0.878035	1.27571	0.938515	1.04312	0.761888	0.818334	1.10511	0.861379	0.7975	0.925065	0.92863	1.00417	1.05287	0.833744	0.921488	1.02118
347	1.51967	1.25995	0.852317	1.57517	1.99255	1.59086	1.26098	0.909164	1.34462	1.58857	0.878252	1.36177	1.13892	1.10358	1.584	0.484231	2.24247	2.18366	1.04519	1.29008	1.97858	3.57515	1.45929	0.919481	1.26384	1.0969	0.620095	1.4381	1.67519	0.751628	1.36437	0.851916	1.04854	1.12868	0.514381	0.911785	1.21667	1.49314	1.6345	1.13204	1.14043	1.35454	1.30019	1.22228	1.07367	1.49202	0.685634	1.92935	2.21337
349	1.45521	1.23584	0.970449	1.38836	1.6636	1.55581	1.14035	1.10623	1.05948	1.17486	0.972487	1.2511	1.52241	1.07441	1.06534	1.29548	1.22749	0.925762	1.18942	0.818551	1.74693	1.13506	1.02166	0.82722	1.01766	1.16983	0.965459	1.01405	1.34675	0.821706	1.08836	1.05247	1.14536	0.946097	1.02761	1.2787	0.803838	1.15758	0.841713	1.16184	1.15842	1.04055	1.1642	1.0634	1.12233	1.0841	0.758871	1.22905	1.07521
350	1.44328	1.2498	1.05234	1.38856	1.57563	1.39374	1.15426	0.996011	1.10123	1.3493	1.24614	1.46374	1.23496	1.05217	1.17892	1.28235	1.27326	0.942018	1.04113	0.982918	1.37323	1.15905	1.06486	0.80149	1.06224	0.987885	1.14938	0.988184	1.32545	0.982607	1.09852	1.18103	1.18366	0.974042	1.10571	1.32734	1.02487	1.20005	0.933356	1.18099	1.19927	0.942419	1.17889	1.18219	1.19304	1.00539	0.671107	1.33696	1.05367
352	1.14382	0.837907	0.897513	0.889443	0.898475	0.94201	1.20112	0.888208	0.887924	0.9752	1.0093	0.890518	0.818301	1.00161	1.04996	0.940567	0.867643	1.17389	1.20984	1.00886	0.683973	0.92749	0.737926	0.749218	0.895564	0.70029	0.710281	0.969196	0.960582	1.50072	1.00289	0.873502	1.07276	0.82897	0.77676	1.03677	1.01711	1.08005	0.767935	1.05005	1.01032	0.830706	1.16424	0.953703	0.954996	0.86133	0.86311	1.08237	0.970309
353	0.807644	1.1261	1.13211	1.10415	1.14364	0.913002	0.978617	0.999342	1.08929	1.3499	1.26332	1.3266	1.38309	0.921882	1.00487	1.10754	1.05535	0.844368	1.47416	1.09788	1.24572	1.03031	0.971186	1.00427	1.18994	0.960858	1.72096	0.947845	1.11546	0.976601	0.993994	1.25255	0.905307	0.840378	1.40146	1.34062	1.13786	0.854504	0.809295	1.03051	0.769505	0.751632	1.0229	1.02463	1.30809	0.929739	0.711639	0.983812	1.16759
355	0.872568	0.999304	0.950979	0.988672	1.00929	1.1317	1.18826	0.667708	0.922644	0.873545	1.01118	1.34849	0.887228	0.895417	0.989388	1.10766	0.930483	1.07254	1.19472	1.13366	1.08605	1.44745	0.766958	0.906601	1.16058	0.7166	1.28544	0.778141	0.898958	0.68663	0.9631	0.905329	0.855874	1.06213	1.28529	1.15895	0.999228	0.866602	0.794889	1.25778	0.982196	1.01434	1.12936	1.00189	1.00114	0.924953	0.870906	1.02963	1.05512
357	1.52144	1.28865	0.998817	1.44769	1.80517	1.54104	1.18337	0.844696	1.01956	1.23828	1.27765	1.5091	1.42755	0.919868	1.32777	1.24821	1.24008	1.00167	1.11203	0.97086	1.68798	1.15117	1.09395	0.828991	1.01415	0.937659	1.13629	0.865208	1.45276	0.907481	1.09247	1.25466	1.07807	0.924618	1.01351	1.44588	1.0282	1.28744	1.09004	1.13027	1.22691	1.07661	1.05468	1.14192	1.10761	0.883657	0.534285	1.47637	0.918076
358	0.769863	1.02294	0.943612	1.03719	1.07058	0.953737	1.21779	0.528931	1.05527	1.00026	1.05979	1.18849	1.12488	0.907968	1.19936	1.05917	0.935046	1.36483	1.50707	1.18817	1.23684	1.22543	0.835087	0.981635	1.36752	0.74797	1.25733	0.797607	1.14268	1.09177	1.05108	0.98937	0.900072	1.06278	1.17434	1.11774	1.00536	0.693648	0.675037	1.25838	0.643534	1.08593	1.37075	1.04141	1.09029	0.935655	0.892804	1.05593	1.08528
359	2.48988	0.700343	2.98693	3.31318	3.38142	3.86927	1.81616	1.30555	0.974163	0.626897	0.796831	1.34626	1.30398	1.77035	2.8407	0.741211	1.1427	1.63132	3.16539	2.48705	3.11955	1.66695	1.29022	1.25152	1.13552	0.822955	1.2039	1.88614	2.17417	1.47331	0.854474	0.623614	1.08937	1.27196	1.13712	1.15723	2.47638	6.01319	4.21879	1.11651	2.66397	2.07274	3.31784	1.5388	1.21878	2.51919	2.09648	0.315848	1.10537
361	1.09759	0.849661	0.883404	1.05669	1.0287	0.928618	1.01094	0.813297	0.875952	0.939267	1.04619	1.03745	0.523163	0.793037	1.03607	0.922335	0.905719	1.11732	0.909887	0.867557	0.700583	0.894408	0.746227	0.76764	0.813359	0.676421	0.822665	0.917037	0.876412	1.82632	0.914868	0.895507	1.65571	0.834727	0.919145	1.14071	0.97848	0.897631	0.598776	1.04861	0.885327	0.824236	1.07286	0.93037	0.88004	0.75694	0.629234	0.965943	1.01087
364	1.06726	0.825288	0.834677	0.78993	0.796169	0.866508	0.572322	0.927029	0.691963	0.790404	0.803948	0.880212	0.957974	0.895408	0.567263	0.802645	0.976208	1.34193	0.576967	0.826137	0.713537	0.715737	1.03417	0.883432	0.78642	1.06047	0.979986	0.959185	0.813208	0.605184	0.914123	0.817058	1.04307	0.742135	0.811409	0.746467	0.778116	0.616866	0.878906	0.775193	0.780776	0.863294	0.830659	0.78082	0.831124	0.794439	0.66578	0.720242	0.905117
365	1.00566	0.893985	0.827847	0.690765	0.770424	0.842014	0.744709	0.891095	0.776535	0.752103	0.900784	0.919401	0.844765	0.866254	0.727461	0.866257	0.959924	0.702311	0.592426	0.860699	0.756006	0.761976	0.887409	1.04825	0.832848	0.976999	0.931543	0.845832	0.757164	0.649372	0.83894	0.801185	1.1462	0.914201	0.771502	0.781479	0.84789	0.70009	0.865986	0.772757	0.765369	0.950567	0.790126	0.866072	0.792847	0.846567	0.733203	0.700812	0.91145
366	1.02656	1.24114	0.922717	0.989783	1.07261	0.776369	0.966719	0.847057	1.11926	1.09353	1.11098	1.10965	0.841788	0.956256	1.03144	1.05104	0.841064	0.857893	0.795391	1.09956	1.05412	0.902442	0.791856	0.683327	1.04443	1.03454	1.14714	0.975504	1.09838	0.698761	0.887682	0.866199	1.088	0.835686	1.28342	1.28426	0.865916	1.07089	0.997067	1.00837	0.977074	0.695666	0.818778	1.00315	1.2266	1.22995	1.06326	0.84186	0.849976
367	0.842051	0.927066	0.811928	0.776844	0.835861	0.943077	0.961164	0.72912	1.04948	0.819402	0.924792	0.832642	0.740742	0.984903	0.886279	0.936237	0.779898	0.986905	0.845744	0.854533	0.900443	0.805552	0.76749	0.837658	0.989082	0.856824	0.968417	0.921312	0.869824	0.809452	0.879858	0.768442	0.903892	0.846967	0.947609	0.936621	0.811966	0.93331	0.92185	0.94973	0.79795	0.798122	0.848718	0.851252	0.818986	0.925896	0.899847	0.792588	0.896344
368	1.18717	1.06086	0.82084	0.731787	0.730339	0.961289	0.688846	0.946795	0.788592	0.811339	0.75909	0.847671	0.984138	0.967666	0.670954	1.13855	1.08607	1.11142	0.514175	0.768128	0.805262	0.807791	1.0372	0.93405	0.814797	1.03083	1.03652	1.00746	0.842564	0.576728	1.07327	1.15141	1.14206	0.737434	0.876547	0.997113	0.800004	0.578135	0.82402	1.02601	0.832856	0.905509	0.881504	0.739454	0.874226	0.807454	0.595339	1.02762	0.907541
369	1.02829	0.984203	1.00308	1.0236	1.14127	1.09609	1.16177	0.726532	0.852579	0.986374	1.09417	1.13842	0.678626	0.789248	1.10968	0.883542	0.986055	1.01035	1.17844	1.0099	0.930975	1.3465	0.941489	0.785264	0.788846	0.725799	1.01717	0.789327	0.86793	1.61737	0.922165	0.791998	1.41322	0.898776	0.943383	1.29236	1.06583	0.876845	0.495022	1.15816	1.49424	0.751102	0.980314	0.948225	0.898067	0.752694	0.556527	0.966422	1.09484
370	1.01472	0.880132	0.875541	0.63518	0.680621	0.796549	0.7289	0.921678	0.720949	0.699242	0.781565	0.838826	0.891207	0.864515	0.601776	0.807938	0.993952	0.554528	0.423536	0.704184	0.651197	0.730924	0.974351	1.12175	0.716681	1.01789	0.869134	0.785932	0.640992	0.621729	0.81518	0.789716	1.42437	0.921172	0.673572	0.860747	0.808584	0.682466	0.781621	0.687772	0.83297	0.998459	0.752169	0.805813	0.686735	0.72724	0.648527	0.725682	0.913027
371	0.731745	0.858376	0.736115	0.640782	0.711172	0.741298	1.08204	0.685038	0.953727	0.73634	0.85888	0.788488	0.611486	0.785047	0.863422	0.893822	0.746991	1.27083	1.10799	0.788418	0.931593	0.792649	0.660552	0.768536	1.09779	0.75577	0.933722	0.919945	0.886897	0.968824	0.905178	0.747591	0.772107	0.816782	0.947666	0.981915	0.794355	1.11596	0.856002	0.942049	0.684162	0.726226	0.888593	0.789312	0.811892	0.84836	1.03982	0.821056	0.843052
372	0.988738	1.01565	0.921963	1.07598	1.19749	1.09729	1.18695	0.751487	0.908479	1.15323	1.19068	1.34834	0.81711	0.806932	1.14418	0.804274	0.991258	1.20809	1.30968	1.07929	0.903932	1.30985	0.704034	0.765076	0.991865	0.723969	1.1451	0.886495	1.14815	2.77057	0.848726	0.587373	1.55999	1.03655	1.036	1.26435	1.10329	0.889534	0.534895	1.19435	1.62034	0.923018	1.19516	1.03457	0.931535	0.856495	0.628133	1.22337	1.06984
373	1.10575	0.893488	0.853806	0.618828	0.623709	0.795785	0.604763	0.905815	0.731819	0.692485	0.740644	0.723923	0.940587	0.824891	0.619266	0.749592	1.07307	0.724626	0.461152	0.723639	0.633395	0.688748	0.944024	1.19177	0.659562	1.01551	0.851321	0.819061	0.654827	0.638548	0.737603	0.799373	1.402	0.821594	0.638427	0.840028	0.788443	0.637889	0.747438	0.810187	0.763906	0.955849	0.759164	0.704228	0.572675	0.737197	0.629678	0.744942	0.909952
374	1.00484	0.907376	0.934003	0.695857	0.752128	0.861707	0.785493	0.91192	0.757096	0.763903	0.851521	0.907589	0.958449	0.870138	0.750001	0.888897	0.93918	0.644572	0.571873	0.860203	0.708734	0.771426	0.985273	1.01836	0.79141	1.01067	0.922918	0.842571	0.717871	0.644832	0.82503	0.776336	1.2275	0.885566	0.791075	0.778889	0.827661	0.747889	0.825877	0.796749	0.79227	0.932984	0.749941	0.83033	0.771129	0.85474	0.760772	0.78638	0.920509
375	0.925388	0.911395	0.86466	0.792852	0.866076	0.92259	0.880537	0.809167	0.858717	0.791251	0.896767	0.882514	0.770119	0.987798	0.808915	0.906756	0.853335	0.842949	0.645887	0.805226	0.809679	0.770032	0.823503	0.924626	0.901325	0.907438	0.920132	0.91157	0.793934	0.738718	0.886	0.77854	0.964572	0.881486	0.866752	0.840924	0.812619	0.800569	0.887254	0.845397	0.783025	0.877405	0.819107	0.858414	0.826929	0.850367	0.802988	0.770663	0.905341
376	1.64741	0.905181	0.564955	1.75903	2.93287	2.04312	1.27295	0.627498	0.540363	0.772576	0.728167	1.01808	2.97915	0.614546	1.94454	0.882982	1.02013	1.13817	1.7491	0.617499	3.59394	1.1552	0.94739	0.998006	0.748494	0.557831	0.77761	0.708647	1.82573	0.646411	1.2709	1.50819	0.76758	0.833955	0.701234	0.880663	0.553556	1.43637	1.52968	1.46655	1.33231	1.68188	0.66521	0.902759	0.930615	0.739976	0.383087	1.82602	0.720502
377	1.03636	0.888355	0.966509	0.924268	1.06197	1.16621	1.18929	0.804921	0.825621	1.04169	1.08218	1.30041	0.711134	0.798786	1.06517	0.892438	1.00957	1.21067	1.09861	1.0199	0.95216	1.29363	0.807691	0.776929	0.883232	0.75414	0.948751	0.704255	1.01142	2.21691	0.853821	0.762773	2.17553	1.07055	0.89286	1.36378	1.01396	0.819088	0.494441	1.22471	1.39687	0.807649	1.1912	0.921272	0.926082	0.736372	0.518227	1.05684	1.05964
378	0.958911	0.897207	0.879835	0.66064	0.728153	0.804727	0.827314	0.814534	0.835087	0.811344	0.911623	0.90181	0.861509	0.878807	0.813685	0.93262	0.829513	0.711839	0.496274	0.782011	0.819549	0.772876	0.903466	0.851894	0.830198	0.939368	0.904001	0.863832	0.771606	0.651165	0.83987	0.744984	1.0337	0.815946	0.853231	0.820894	0.799314	0.691463	0.848446	0.850145	0.814356	0.827543	0.765001	0.861034	0.92707	0.951112	0.823084	0.783815	0.881895
379	1.66315	0.970434	0.725616	1.64565	2.36911	1.85917	1.2748	0.665413	0.732127	1.02018	0.952649	1.23145	2.04306	0.682636	1.54361	1.12074	1.09818	1.0904	1.42799	0.762293	2.63473	1.19975	1.02695	0.939564	0.854136	0.52372	0.969235	0.734617	1.76522	0.731825	1.15973	1.48748	0.897029	0.868715	0.786936	1.05636	0.748288	1.3007	1.30253	1.29499	1.27293	1.4269	0.77017	0.993601	0.96045	0.742497	0.366703	1.75913	0.766307
380	0.983352	1.02125	1.05958	1.27661	0.992209	1.18972	0.864422	1.08029	0.830483	0.836197	0.954726	1.12677	1.08186	0.934765	0.966558	0.875933	1.05684	0.858157	0.727919	0.934291	0.748075	0.792111	0.889965	1.07857	0.682987	0.882751	0.949637	0.933165	0.901355	0.687622	0.865421	0.839447	0.943221	0.968284	0.807971	1.18056	0.871397	0.818099	1.07881	1.02	0.708228	0.985904	0.944813	0.941104	0.834122	0.938365	0.679772	0.848828	0.913603
381	1.3966	0.968795	0.921624	0.885043	1.00916	0.974384	0.759946	1.05957	0.748255	0.773397	0.590133	0.761788	0.922146	0.942133	0.67083	0.78229	1.13493	0.924893	1.02723	0.750483	0.718406	0.747657	0.925857	1.12419	0.552386	1.01243	0.949951	1.08736	0.729015	0.51244	0.795468	0.549769	1.19433	0.879475	0.689014	0.792531	0.646717	0.610613	1.10774	1.15589	0.792159	1.10075	0.675724	0.700519	0.613968	0.752589	0.610205	0.772477	1.02159
383	1.10487	1.04982	1.06778	1.07721	1.28142	0.999968	1.12772	0.803374	0.929516	1.19741	1.24259	1.29826	0.811705	0.729563	0.935384	0.808338	1.11098	1.23764	1.21646	1.01304	0.79841	1.193	0.635981	0.859547	1.01911	0.807646	1.18917	0.882704	1.09117	2.87935	0.887552	0.620811	2.81763	1.06368	1.02976	1.19471	0.995336	1.01064	0.715604	1.10025	1.91386	1.01289	1.0852	1.05481	0.900802	0.815985	0.687584	1.17725	1.08122
385	1.52834	1.01575	0.964362	0.805757	0.788063	0.756387	1.44027	1.3356	0.546457	0.710377	0.615239	0.810729	0.810296	0.907978	0.893829	0.740092	1.11814	1.07542	1.7785	0.690871	0.779419	0.784237	0.721401	1.22907	0.45673	0.93442	0.957597	1.13733	0.73947	0.765457	0.645774	0.507928	1.17407	0.795254	0.688759	0.864944	0.586057	0.983386	0.727138	0.879015	0.674914	1.25619	0.714628	0.670029	0.755961	0.617981	0.606479	0.864989	1.09311
386	1.38329	1.131	0.941386	1.3912	1.62346	1.49978	1.197	0.896398	1.4882	0.892658	1.05202	1.3344	1.60279	0.909857	1.48488	0.688739	1.80225	1.69588	0.840352	0.949196	1.40657	1.25605	1.33644	0.991247	1.09636	0.9836	1.19372	1.11803	0.796948	0.967788	1.13798	0.937617	0.991454	1.0635	1.07408	1.00857	1.14136	1.55819	1.96496	1.04179	1.07432	1.02874	1.021	1.16143	1.31677	1.71103	0.722506	1.69691	1.68722
388	0.934166	0.753962	0.836827	3.57293	4.08818	2.20114	1.71856	1.84264	1.23629	1.00006	1.09511	0.664556	2.0944	3.13615	1.28352	1.31564	0.866986	1.53909	1.67382	1.10344	1.28651	1.02804	3.16767	1.129	1.79339	0.911527	1.52922	1.53681	7.12901	1.12035	0.624442	1.0479	1.92385	1.50554	1.61525	1.03698	1.47815	2.03589	1.79276	0.6365	0.972186	1.41454	5.80248	0.94116	1.10415	1.65358	2.2326	1.01891	0.895408
391	0.997141	0.964958	0.881683	0.768927	0.883302	0.77029	0.912828	0.762232	1.00451	0.916041	0.94853	0.95347	0.89102	0.929364	0.957916	0.995214	0.792574	0.792653	0.667168	0.944606	0.908742	0.823548	0.868263	0.788333	0.888622	0.89273	0.967955	0.929067	0.835945	0.663392	0.878818	0.829097	1.01111	0.760649	0.997648	0.929258	0.802599	0.848055	1.02624	0.90705	0.876605	0.779325	0.789078	0.887498	1.04415	1.06293	0.8976	0.808312	0.901919
393	0.597307	0.780405	0.623342	0.652396	0.693477	0.730427	1.29385	0.592832	0.936554	0.680864	0.771059	0.752079	0.626072	0.749158	0.898373	0.844463	0.642868	1.76895	1.6515	0.814978	0.971296	0.768785	0.566958	0.696312	1.15844	0.683032	0.941956	0.887136	0.892327	1.37806	0.897231	0.71093	0.619386	0.783198	0.924927	0.937233	0.709211	1.61612	0.923143	0.951126	0.607369	0.66902	0.926001	0.695705	0.684789	0.826585	1.24973	0.855357	0.810338
395	1.39441	0.847076	0.579343	1.32698	2.33005	1.62906	1.21164	0.692435	0.51417	0.628369	0.642526	0.857791	2.94152	0.659569	2.28984	0.617725	0.981509	0.961815	1.61392	0.585405	3.47876	0.976596	0.780756	1.05397	0.659939	0.716669	0.678501	0.778942	1.3762	0.597892	1.09082	1.14294	0.720021	0.775405	0.793664	0.804133	0.538265	0.898974	0.949522	0.872576	0.894517	1.54587	0.606645	0.849844	0.925087	0.839229	0.663437	1.56773	0.798251
396	1.11436	0.932196	0.934188	0.943168	1.3234	1.17776	1.1614	0.787238	0.801717	0.842119	0.88769	1.03005	1.62985	0.907388	1.58418	0.932047	1.05298	0.830011	0.988789	0.901678	1.80279	1.03321	0.848062	1.06993	0.910135	0.919877	1.05174	0.937749	1.0464	0.726181	1.0257	1.11074	0.853116	0.855314	0.897431	0.89051	0.853596	0.797398	0.856253	0.964949	1.01114	1.14336	0.969872	0.936846	1.07751	1.13652	0.787804	1.07154	1.09072
397	1.37411	1.26499	1.14734	1.3397	1.16292	1.25482	0.967406	1.04096	0.991503	1.31345	1.12246	1.41046	1.38709	1.31609	0.975348	1.19253	1.40892	0.992718	0.989904	1.24495	1.16104	0.93295	0.445212	1.22903	1.14131	1.16309	1.22961	1.10577	1.17184	1.02078	1.25314	1.02661	1.16755	0.928632	1.06011	1.18225	1.07078	1.0866	0.90191	1.37435	1.11393	1.18505	1.20894	1.07649	1.40066	1.33925	1.13213	1.26547	1.14535
399	1.04937	1.02987	0.972517	0.979079	1.25196	1.12117	0.890114	0.781293	0.858562	0.876417	1.00007	1.19443	1.4362	0.983887	0.920052	0.952003	1.05426	0.848077	0.973693	1.03622	1.43076	1.01353	0.838395	1.07856	1.03456	0.970137	1.12642	0.949758	1.07855	0.745737	0.966392	0.936552	0.836916	0.892708	0.983376	0.998365	0.93895	0.87904	0.996414	1.01496	0.99929	1.12443	0.991696	0.955814	1.19625	1.09149	0.910428	1.04321	1.12118
400	1.00274	1.15654	1.08477	1.13831	1.05285	1.0205	1.00705	0.968192	0.854876	1.06343	1.03971	1.39355	0.912619	0.901057	1.01204	0.963137	0.914386	0.721445	0.648979	1.14253	0.772796	1.08532	0.858702	0.855424	0.698186	0.86621	0.841134	0.807092	0.881518	0.709139	0.862879	0.961191	0.786874	0.857339	0.826705	0.873254	0.950843	0.675196	0.860359	1.23393	1.04612	0.815734	0.836119	0.98285	0.87885	0.921959	0.579705	0.895344	0.827211
401	0.892816	1.10857	0.987928	1.08709	1.03392	0.870014	1.10064	0.836642	0.900752	1.0978	1.07113	1.17173	0.796207	0.874477	1.04129	1.04051	0.834743	0.931784	0.631721	0.991922	0.775087	1.07497	0.708184	0.808312	0.79849	0.789096	0.858637	0.892026	0.983605	0.830313	0.913015	0.989551	0.799303	0.885879	0.962738	0.927859	0.940634	0.75474	0.839253	1.24914	1.04034	0.751013	0.936788	1.01004	0.851697	0.882386	0.714144	0.93075	0.844032
403	1.03901	1.02626	1.13537	1.01441	0.949375	1.12392	0.874144	0.897815	0.751865	0.963056	1.00575	1.23904	0.953868	0.9322	0.958652	0.933366	1.01218	0.635036	0.486536	1.0118	0.802806	0.962835	0.871999	0.898636	0.592076	0.822753	0.824823	0.733234	0.864352	0.518406	0.828313	0.904051	0.81639	0.817428	0.765688	0.922683	0.936727	0.627294	0.926452	1.05685	0.936529	0.860189	0.814403	0.960481	0.88513	0.859446	0.560854	0.84623	0.833074
404	0.861428	1.05014	0.805735	1.07803	0.939011	0.778413	1.17297	0.697693	0.922161	1.04472	1.00184	1.01582	0.689529	0.829598	1.01762	0.987521	0.789236	1.21153	0.878108	0.930535	0.722715	0.996647	0.666643	0.737884	0.869653	0.734997	0.820667	0.950768	1.09302	1.0951	0.973493	0.933825	0.748524	0.759961	1.01113	0.971815	0.865576	0.791552	0.746338	1.21357	0.87322	0.729119	1.02341	0.927886	0.783651	0.791977	0.717283	0.851882	0.830878
405	1.0214	1.3962	0.863505	1.0758	1.15039	1.0308	1.10741	0.847784	1.24575	1.17526	1.17169	1.09416	0.880618	1.03186	1.09696	1.23464	0.837289	0.820677	0.78122	1.23918	1.16864	1.05606	0.716605	0.630206	1.29311	1.07244	1.22067	1.19588	1.29661	0.792423	0.998282	0.941635	1.08458	0.799731	1.41948	1.64206	0.870065	1.50007	0.972117	1.13372	1.06281	0.629221	0.923927	1.01837	1.31578	1.48462	1.3665	0.974944	0.824498
406	0.915062	1.31284	0.841721	1.0196	1.09952	0.960853	1.15296	0.786354	1.14558	1.07466	1.07805	1.1235	0.833592	0.982234	0.982683	1.07119	0.784404	0.957381	1.4925	1.0581	1.09718	1.02116	0.634756	0.678358	1.16865	1.04219	1.18433	1.04249	1.25952	0.873403	0.969606	0.853196	0.983926	0.786691	1.36077	1.49796	0.82201	1.74982	0.995485	1.16548	0.923854	0.605076	0.873978	0.960693	1.23915	1.36373	1.31291	0.923927	0.834685
407	1.03749	0.920366	1.18046	0.920048	0.93399	1.14294	0.80756	0.990356	0.719837	0.876091	0.893012	1.25438	1.02115	0.916174	0.843291	0.847196	1.01849	0.573192	0.407999	0.88792	0.785547	0.909217	0.770139	1.02647	0.540526	0.820088	0.780543	0.701558	0.745702	0.46584	0.787531	0.837758	0.828545	1.0112	0.644526	0.924923	0.846548	0.664095	1.00738	0.919857	0.78204	0.883787	0.744894	0.926922	0.796978	0.851173	0.49541	0.723212	0.877454
408	0.714162	0.99126	0.675722	0.852237	0.74678	0.663252	1.29734	0.621492	0.876164	0.97183	0.851505	0.870406	0.603592	0.75553	0.867769	0.907369	0.716832	1.5329	1.37058	0.894959	0.618667	0.932215	0.67232	0.773942	0.951368	0.705923	0.758166	0.891806	1.0882	1.35854	0.974737	0.854306	0.742398	0.731616	0.990132	0.929488	0.726974	0.906958	0.712066	1.12435	0.722498	0.721814	1.07004	0.734748	0.667415	0.715187	0.768499	0.815012	0.797533
409	1.4438	0.575117	0.886029	1.03616	1.12183	0.739812	0.700726	1.67189	1.11606	0.637703	0.748219	0.809679	0.751972	1.16063	1.04252	0.95907	0.626534	0.835368	0.743944	0.905546	1.7274	1.2556	0.953257	0.85809	1.00799	0.320684	0.248748	1.13719	1.33953	0.80174	1.06273	0.798352	1.00777	0.910066	0.330757	0.407484	0.680063	0.536584	0.80229	1.02679	1.16013	0.769422	1.12854	0.942062	0.767131	1.24031	1.5065	2.30865	1.0811
410	1.51298	1.06544	0.973608	1.17612	1.11272	0.97241	1.03517	1.38801	1.16794	1.11906	0.90917	1.10649	0.90857	1.17719	0.898938	1.16271	1.13648	0.886753	0.809594	0.93082	0.914908	1.01718	0.996818	0.817534	1.0492	1.11187	0.662579	1.22663	1.29134	0.86513	1.04148	0.944073	1.20773	1.04083	0.827571	1.00205	0.828913	1.02413	0.817607	1.0577	1.04752	0.819048	1.17812	1.10131	1.04892	1.38443	1.37402	1.12717	1.17716
412	0.730475	0.846797	0.650625	0.784423	0.654917	0.577738	1.27832	0.680002	0.763442	0.802014	0.832554	0.770716	0.580539	0.681235	0.79821	0.740312	0.772028	1.67599	1.48157	0.801957	0.598581	0.763336	0.70119	0.810128	0.941255	0.707166	0.726249	0.872558	0.987316	1.56772	0.872288	0.721647	0.978121	0.711023	0.826661	0.790294	0.739177	0.924604	0.623164	0.921695	0.587422	0.777612	1.09175	0.6067	0.53941	0.599575	0.733067	0.67749	0.843847
413	1.35389	1.78048	1.05114	1.34163	1.28978	1.04709	1.37575	1.19858	1.42061	1.56068	1.32829	1.50166	1.80054	1.43752	1.09069	0.628241	1.55104	0.980872	1.07907	1.35854	1.51083	1.5985	1.01326	1.48624	1.2419	2.01234	1.36011	1.37449	1.40402	1.31769	1.35211	2.06056	1.03266	1.04051	1.62264	1.50327	1.14489	1.17156	1.33819	1.47412	1.45807	1.29426	1.39903	1.23174	1.53076	1.56388	0.983821	1.29426	1.1219
414	0.916893	0.839956	0.789803	0.591144	0.506736	0.686109	0.91188	0.785708	0.668474	0.678796	0.687727	0.620883	0.686724	0.735626	0.659153	0.784911	0.951758	1.01534	1.17411	0.836615	0.641455	0.706328	0.867057	1.11914	0.689198	1.13222	0.82593	0.711381	0.791963	1.11778	0.784475	0.795906	1.62858	0.873546	0.596182	0.78629	0.735442	0.812864	0.658237	0.7094	0.696206	0.978709	0.673683	0.680265	0.476185	0.721015	0.769431	0.674702	1.00374
415	0.669731	0.895783	3.11158	0.725149	0.721175	0.810786	1.4657	0.610202	1.02227	0.789788	0.837625	0.819308	0.859862	0.819594	1.0026	0.839657	0.673743	1.03775	3.33211	1.96606	2.47174	0.898412	0.999119	0.673589	1.31808	0.723835	1.00528	0.955555	1.07469	1.69027	0.922955	0.742447	1.17513	0.797731	1.01911	1.13363	1.22415	1.87316	1.17776	0.995455	0.684194	0.671107	0.994855	0.738597	0.900945	0.888151	1.32356	0.926102	2.43562
418	1.56321	0.408269	0.918289	0.869078	1.34376	1.07433	0.850749	1.69815	1.2998	0.939659	1.22709	0.88338	1.34359	1.13033	1.09961	0.985934	1.54521	0.908575	0.939086	0.841473	1.78391	1.12231	1.06906	1.29689	1.32888	0.162185	2.02126	1.11891	1.12982	0.757038	1.14133	1.22857	0.719136	1.15582	1.89761	1.76284	0.763815	0.926931	1.25912	0.950701	1.12848	1.1165	1.22067	1.03379	1.25853	1.44393	1.64942	1.05542	1.72212
422	0.970134	1.08467	0.926269	2.33381	1.70748	0.909372	1.76604	0.713042	0.653583	1.05516	0.96784	1.13711	1.19766	1.60541	0.988628	1.14401	1.04708	1.0435	2.97068	2.25691	1.25176	0.898949	2.92981	1.00985	1.57648	0.703446	1.29946	1.08073	1.38825	1.49517	1.00535	1.01507	2.27042	1.25323	1.40217	1.27898	1.62759	0.961531	1.2025	0.958834	0.965703	1.08303	1.97003	0.938954	0.783854	0.982604	2.37301	1.20764	0.811779
423	1.25992	1.15074	1.01962	1.10037	1.06192	1.10131	0.980939	1.28931	1.20462	1.11091	1.07077	1.24511	1.04055	1.11144	0.966145	1.18142	1.22084	0.916591	0.837693	1.00939	1.02384	0.884323	0.904054	0.884482	1.07792	1.12311	0.957626	1.16174	1.08479	0.979266	1.01515	0.890917	1.20912	1.04812	1.11979	1.21192	0.888195	0.949075	0.869935	0.963522	1.02021	0.844248	1.16761	1.14046	1.24597	1.40621	1.18463	0.822567	1.04297
424	0.990721	1.18337	1.04074	0.980003	1.13832	1.08748	0.932876	0.828158	0.936191	1.04873	1.0725	1.34748	1.12399	1.05754	0.925139	1.15882	1.02227	0.951346	1.08079	1.24991	1.24149	1.07608	0.83734	1.00999	1.17058	1.05926	1.28023	0.970715	1.17245	0.878342	0.977135	1.39096	0.841326	0.905576	1.09698	1.23963	0.963094	1.03585	1.04209	1.05945	1.07761	0.959931	1.07528	0.96671	1.29032	1.15145	0.967907	1.06624	1.05738
425	0.863837	1.03135	0.929644	0.858465	0.954766	0.96592	0.810633	0.975814	0.990663	0.827211	0.894361	1.03148	1.02344	0.936302	0.92326	0.988749	1.00319	0.707335	0.658472	0.952378	0.92823	0.966708	0.878027	1.16561	0.970373	1.06571	1.07971	1.02612	0.958408	0.617312	1.05778	1.11579	0.835247	0.95381	0.995125	0.92224	0.933909	0.818005	0.88037	0.98393	1.00432	1.07684	0.939349	0.930044	1.07828	1.06615	0.980118	0.908425	1.04186
427	1.19465	1.13775	1.00107	1.0273	1.01462	0.967029	1.0148	1.1708	1.1389	1.09847	1.0445	1.2175	0.936593	1.03015	0.978378	1.14811	1.18723	0.914772	0.831791	0.99137	0.919072	0.928324	0.900718	0.915757	1.0646	1.10582	1.01847	1.09567	1.0416	0.959524	1.03596	0.948839	1.10676	0.966309	1.0971	1.16288	0.92306	0.964762	0.858576	0.991429	1.02735	0.869667	1.16475	1.10109	1.14856	1.22809	1.05564	0.9551	1.07688
429	1.26322	1.14252	0.987771	1.05007	0.99316	1.02465	0.943457	1.36863	1.1889	1.10971	0.957988	1.16896	1.00292	1.13645	0.975187	1.15777	1.13323	0.919068	0.812141	0.935717	0.935516	0.852125	0.86473	0.898289	1.02449	1.28892	0.890769	1.19258	1.03156	0.944706	1.00851	0.930032	1.18421	1.00516	1.04756	1.17231	0.842672	0.980218	0.803442	0.939718	0.987463	0.822324	1.1064	1.09393	1.22071	1.43055	1.33074	0.957223	1.00065
430	1.08958	1.0963	1.01579	1.00183	1.05958	0.962743	1.01577	1.03853	1.13348	1.13338	1.105	1.29103	0.944551	0.966092	1.02198	1.15734	1.18803	0.943402	0.866025	1.0127	0.904712	0.973038	0.942722	0.951765	1.07462	0.996502	1.10465	1.03886	1.06345	0.978539	1.04304	1.04695	1.02437	0.947919	1.08433	1.18537	0.975754	1.12006	0.897893	1.01352	1.05905	0.945289	1.14971	1.10308	1.16512	1.14472	0.908948	1.03179	1.05617
432	1.23332	1.04626	0.991835	1.01972	0.981746	1.01458	0.876829	1.37471	1.16823	0.975033	0.93298	1.12519	1.04163	1.17585	0.937328	1.1135	1.05275	0.934619	0.848993	0.936923	1.08508	0.831	0.863287	0.921862	1.01292	1.12359	0.874228	1.19745	1.05094	0.9467	1.05469	0.90726	1.15473	1.00089	1.05635	1.1134	0.828252	0.907823	0.781477	0.936007	0.963103	0.868797	1.02266	1.07172	1.20654	1.47663	1.42709	0.766901	0.951895
433	1.0063	1.13175	1.03427	0.983343	1.10419	0.973176	1.01604	0.950498	1.12269	1.11245	1.15085	1.32794	1.02054	0.942515	1.08139	1.17363	1.19258	0.964583	0.910601	1.03559	0.887952	1.02179	1.00804	1.04626	1.05155	0.949765	1.20371	1.00182	1.09609	0.981363	1.06041	1.13869	0.963618	0.950042	1.10497	1.20619	1.02906	1.12841	0.932407	1.02714	1.06629	1.03607	1.12595	1.08697	1.21338	1.10315	0.859128	1.09012	1.03181
434	1.15917	1.04579	0.988198	0.987526	0.923303	0.962713	0.806932	1.34163	1.11972	0.886118	0.890634	1.13044	1.07252	1.1665	0.879209	1.04135	0.981196	0.931789	0.911434	0.966796	1.04851	0.782827	0.886148	0.968801	1.02833	1.12097	0.906184	1.18547	1.04224	1.02262	1.01941	0.915127	1.07228	0.988932	1.05729	1.03456	0.822005	0.931461	0.688382	0.869916	0.915387	0.930346	0.980298	1.05053	1.14257	1.49366	1.44092	0.799953	0.979721
435	0.879128	0.964779	0.910116	0.769786	0.886932	0.874948	0.869014	1.03954	0.969027	0.804838	0.890776	0.908167	0.903115	0.861389	0.900558	0.98213	0.976375	0.745825	0.588263	0.919549	0.894643	0.904597	0.927694	1.17366	0.899667	1.02532	1.00938	0.980779	0.902329	0.64235	1.05918	1.11483	0.828709	0.953233	0.903078	0.83125	0.918245	0.726644	0.852598	0.948186	0.960304	1.03049	0.900436	0.923726	0.956066	1.01207	0.953436	0.90037	1.00975
437	0.989734	1.11339	0.968517	0.929031	0.932931	0.988702	0.862909	1.18839	1.08418	0.842279	0.906659	1.17784	1.24818	1.18305	0.895482	1.0126	0.947343	0.975859	1.01439	0.992237	1.03738	0.977379	0.90638	1.04209	1.00151	1.19981	0.932128	1.17104	1.0794	1.01306	0.974954	0.952115	0.999967	0.986061	1.01968	0.963288	0.870211	0.990819	0.786347	0.836517	1.03046	0.989494	0.974964	1.0179	1.05808	1.57791	1.36781	0.799074	0.91894
438	0.729189	0.929763	0.84867	0.756114	0.909948	0.857876	0.882266	0.881148	1.03448	0.823679	0.987158	0.898512	0.907344	0.817658	0.958672	0.964782	0.999303	0.91991	0.879149	0.899016	0.827996	0.943396	0.954789	1.12882	1.01774	0.945548	1.06843	0.992659	0.937215	0.791309	1.16731	1.0581	0.746879	1.0063	0.947954	0.899968	0.944341	1.03662	0.855511	0.965525	0.933554	0.977018	0.9715	0.928109	0.977331	0.955376	1.01206	0.914727	1.04218
439	1.23132	1.11001	1.09336	1.05288	1.21482	1.29222	0.694943	0.973552	1.49632	0.84541	1.14435	1.33148	0.701689	0.786513	1.19951	1.07729	1.42657	1.18253	0.766833	0.895543	1.27073	1.40642	1.30632	1.12356	0.70057	1.04087	0.694917	1.10858	1.27451	0.725725	1.19154	1.32781	1.3972	1.1545	0.764015	0.940618	0.837172	0.663855	0.596117	1.06066	1.34214	1.03789	0.617928	1.1312	1.30683	1.00372	0.955282	1.36616	1.28313
440	0.966467	1.03164	1.01249	0.797561	0.883221	1.05035	0.882142	1.05013	0.920537	0.81027	0.877791	1.1054	1.05414	0.945859	0.900806	1.00879	1.04176	0.585097	0.428129	0.933124	0.95821	0.911667	0.880086	1.12322	0.861044	1.04773	1.04808	0.980205	0.899731	0.475072	0.937171	1.09717	0.824845	0.977619	0.930752	0.84126	0.916876	0.672126	0.865277	0.99184	0.930999	1.1827	0.867797	0.944041	1.08461	1.06674	0.850026	0.787199	1.03754
441	1.0167	0.779552	0.88333	0.569354	0.694363	0.848793	0.698939	0.89809	0.738903	0.614271	0.787451	0.742424	0.64036	0.731196	0.65113	0.69326	0.987446	0.855601	0.547425	0.771536	0.717964	0.879819	0.772636	1.045	0.853571	0.692467	0.825596	0.762132	0.611439	0.703133	0.783794	0.719083	1.12464	0.952435	0.715722	0.819393	0.832834	0.590358	0.54626	0.812531	0.709559	0.864302	0.836882	0.897163	0.665745	0.90937	0.75356	0.701678	1.10808
442	0.974129	0.929691	0.961042	0.792476	0.966199	1.04834	0.777947	0.78735	0.7248	0.882589	1.01333	1.07537	0.906127	0.667422	0.764868	0.79172	1.08331	0.921535	0.741549	0.992937	0.790491	1.07236	0.945375	0.964	0.885882	0.80447	1.22492	0.670351	0.801181	1.53006	0.734918	0.851143	2.169	1.14045	0.862077	1.03184	1.03426	0.768075	0.760807	0.978882	1.35428	0.926207	0.944898	0.941257	0.870535	0.780776	0.55301	0.813131	1.08458
443	0.930653	0.807594	0.931144	0.719682	0.845506	0.896485	0.688858	0.811018	0.738592	0.730977	0.942558	0.951636	0.797504	0.635067	0.758716	0.745107	1.05793	0.834797	0.648927	0.846639	0.653137	0.83934	0.943078	1.02801	0.824234	0.744546	0.998401	0.697338	0.73628	1.06869	0.765605	0.876244	1.44868	0.96561	0.725799	0.848023	0.882231	0.676314	0.696833	0.874904	0.898527	0.955492	0.901098	0.915754	0.782701	0.719453	0.508559	0.728796	1.01447
444	1.396	0.760849	3.98084	2.71826	3.05968	2.81858	1.45402	1.30796	1.20332	0.655349	0.736098	1.18349	0.997283	1.72251	1.94323	0.939044	1.23794	1.13249	4.95775	5.37769	3.22396	2.96652	1.70479	1.09025	1.96693	0.825864	1.41113	0.865708	1.58	1.26387	1.00704	0.73038	1.39684	1.20258	1.39857	0.846828	2.4871	8.20782	6.93962	2.24683	2.79272	1.15139	2.69266	1.11837	0.84825	2.27186	1.7839	0.678869	0.95962
445	1.08598	1.40043	1.30512	1.22475	1.62503	1.5689	1.25659	0.934909	1.27671	1.73958	1.74389	2.00943	1.28903	1.08939	1.28146	1.44797	1.56585	1.17319	1.22632	1.27863	0.870897	1.19628	1.1396	0.902121	1.32018	0.976727	1.56405	0.934572	1.16197	1.18197	1.15845	1.17572	1.25125	1.13972	1.24031	1.8235	1.33878	1.33351	1.03843	1.17574	1.2623	0.950378	1.37829	1.33114	1.46261	1.01295	0.565805	1.34818	1.24709
448	1.01839	0.975997	0.917598	0.813828	0.886266	0.989002	0.786362	0.957531	0.923908	0.866165	0.984408	0.935617	0.881017	0.9506	0.800715	0.892237	0.998324	1.12002	0.930995	0.934844	1.16873	0.732623	1.00972	1.02666	1.07311	0.901244	0.965753	0.8677	0.939075	0.835539	0.976935	0.838269	1.09046	1.02555	0.899098	0.987024	0.956039	0.618956	0.679599	0.665027	0.812145	0.9384	0.931122	0.911204	0.818965	1.13149	1.18764	1.16918	1.07162
450	0.988812	0.856358	0.933634	0.646068	0.82751	0.935037	0.621147	0.822927	0.80022	0.712372	0.841583	0.851631	0.674586	0.748699	0.659904	0.766484	0.995882	0.875336	0.709623	0.887744	0.805216	0.962259	0.922738	1.02292	0.855962	0.76364	0.901814	0.761275	0.66494	0.705937	0.741963	0.788775	1.19212	1.01788	0.784389	0.907232	0.908744	0.506327	0.657489	0.872722	0.789073	0.868275	0.882249	0.906043	0.710395	0.852638	0.743366	0.785006	1.13634
451	0.959122	0.91608	1.01486	0.691937	0.87475	0.956674	0.758017	0.774152	0.771975	0.780828	0.932866	1.00884	0.739072	0.769305	0.775005	0.854316	1.02443	0.91523	0.688888	0.932172	0.871219	1.08466	0.924309	0.979542	0.859205	0.789781	1.07201	0.755727	0.718082	0.775782	0.763402	0.87769	1.35504	1.08521	0.876287	0.96771	0.959542	0.62001	0.641061	0.966822	0.846412	0.884162	0.959464	0.953173	0.78544	0.844165	0.730677	0.842769	1.17268
452	0.954837	1.00373	1.04485	0.814437	1.00616	1.09309	0.884027	0.757615	0.792444	0.896839	1.01613	1.15667	0.87499	0.792147	0.834659	0.891346	1.07335	0.999009	0.81056	1.07585	0.956475	1.15867	0.953619	0.952224	0.899308	0.825507	1.25041	0.734878	0.821599	0.951734	0.784004	0.843568	1.53273	1.16735	0.973599	1.06751	1.03481	0.868262	0.747985	1.03349	0.972141	0.904184	0.998085	0.989168	0.90893	0.866144	0.661128	0.901467	1.16662
453	0.846642	0.875081	1.15604	0.765853	0.954469	1.03151	0.708185	0.82311	0.714061	0.935738	1.12919	1.04946	1.15217	0.699427	0.762169	0.890854	1.13492	0.929733	0.65581	0.885882	0.6136	1.0665	1.10473	1.05802	0.823593	1.14606	1.35587	0.636787	0.662379	1.28774	0.773171	0.940383	1.46188	1.36436	0.840282	0.871465	1.27005	0.610801	0.78131	0.957457	1.12637	0.991511	0.920236	1.09289	0.835663	0.785018	0.529251	0.934264	1.10354
454	0.991444	1.09743	1.0518	0.921768	1.06432	1.1388	0.912272	0.770808	0.761699	1.00688	1.06391	1.27305	1.06905	0.738083	0.877987	0.854558	1.09901	1.03185	0.85451	1.13016	0.934382	1.20407	0.955212	0.89377	0.912197	0.885065	1.38798	0.700705	0.915968	1.55088	0.759416	0.842472	2.4776	1.27081	0.988435	1.17095	1.07824	0.951514	0.871329	1.07742	1.37128	0.921481	1.04659	1.01536	0.987716	0.849075	0.624116	0.996697	1.16181
456	1.00495	1.16179	1.06966	0.920019	1.10848	1.05668	1.00379	0.940404	1.0573	0.992198	1.08392	1.23725	1.07067	0.930076	1.00255	1.07534	1.12322	0.976646	0.894734	1.03239	1.01011	0.907695	0.957845	1.05664	1.16081	1.06044	1.29431	0.999485	1.0829	0.896045	1.03854	1.01108	0.982813	1.09242	1.08903	1.14054	1.04476	1.16714	0.933199	1.10043	0.881108	1.00757	0.986171	0.994806	1.08463	0.990066	0.806443	0.95355	1.05566
458	0.946812	1.11232	1.04671	0.887641	1.1131	1.20795	0.944071	0.750653	0.794731	0.972467	1.05794	1.30902	1.01389	0.779724	0.912618	0.877829	1.10086	1.06627	0.969462	1.14401	0.970616	1.21144	0.950551	0.912526	0.953249	0.877619	1.39814	0.700837	0.932166	1.18233	0.789321	0.861115	1.84751	1.26646	1.01783	1.19917	1.07159	0.942111	0.827601	1.0944	1.2181	0.937048	1.0383	1.00519	0.999973	0.847269	0.615904	0.981295	1.16863
459	0.709822	0.971585	1.0485	1.28474	1.28984	1.4477	1.05475	0.831585	0.868368	0.997583	0.939414	1.15184	1.7441	1.32782	1.14114	1.40606	1.04072	0.741936	0.893139	1.16107	1.2072	0.9514	1.08672	1.08237	1.04509	0.97831	1.13325	0.949492	0.954005	0.920298	1.06079	0.905464	0.984091	0.91527	1.16258	0.898988	1.06253	1.56122	1.42976	1.00525	1.16316	1.29684	0.907831	0.874019	1.42221	1.13114	1.00266	1.20726	1.14888
460	0.966699	1.32705	1.28942	1.09355	1.49445	1.3957	1.16836	0.975306	1.33641	1.55653	1.60487	1.81362	1.50471	0.972064	1.35209	1.34897	1.39326	1.41142	1.37237	1.28561	1.49701	1.22327	1.18177	1.03502	1.26665	1.06069	1.60613	0.953995	1.17598	1.17767	1.19286	1.22671	1.20732	1.10794	1.39698	1.60574	1.44867	1.36769	1.11666	1.19807	1.24089	1.10755	1.36968	1.2542	1.31368	1.03862	0.727074	1.3781	1.31236
462	1.01842	1.43659	1.36405	1.3125	1.07818	1.14524	0.984868	1.08958	0.790002	1.54437	1.15565	1.36463	1.34681	1.82193	0.742988	1.44868	1.10498	0.831203	1.04154	1.17515	1.55545	1.02574	0.983486	1.1432	1.3945	1.84561	1.36971	1.28623	1.17907	0.827982	0.986754	0.914935	0.873872	1.16058	1.74998	1.18216	1.1155	0.866811	0.95239	0.942671	1.1573	1.20644	0.912191	1.25482	1.47519	1.45868	1.54867	1.01557	1.24436
463	1.05136	0.955351	1.02603	0.768347	0.752436	0.979117	0.853348	0.987879	0.844647	0.805648	0.788801	1.09958	1.0391	0.99511	0.805713	1.05807	1.02242	0.466655	0.361089	0.917012	0.966323	0.856397	0.902741	1.17509	0.79952	1.07434	0.936966	0.933694	0.870129	0.518396	0.837112	1.05751	0.883774	0.899973	0.873888	0.767005	0.886282	0.67609	0.825016	0.958512	0.893498	1.18974	0.798128	0.891544	1.05779	1.10938	0.800461	0.76278	1.06209
464	0.937083	0.762737	0.937075	0.64794	0.820066	0.851634	0.706664	0.853885	0.81697	0.715123	0.976895	0.854884	0.743585	0.629662	0.723739	0.781023	1.05535	0.813845	0.531282	0.772787	0.624267	0.718585	0.936738	1.06566	0.882431	0.734055	0.917885	0.793804	0.731743	0.730541	0.810789	0.864306	0.966883	0.926778	0.69218	0.818249	0.903412	0.673235	0.723685	0.841064	0.722194	0.946481	0.878954	0.906347	0.756842	0.732485	0.542453	0.685934	1.01659
465	0.975539	0.9008	0.995228	0.709451	0.904855	0.942701	0.803767	0.918627	0.91577	0.808884	1.02911	0.932485	0.84813	0.75672	0.794889	0.897654	1.10375	0.85274	0.636089	0.861527	0.766941	0.759746	0.943879	1.06129	0.990766	0.83455	1.03464	0.883192	0.835911	0.776507	0.886207	0.938299	0.942385	0.979545	0.817427	0.926928	0.988361	0.846496	0.779093	0.968505	0.777073	0.986583	0.930283	0.950776	0.851163	0.832019	0.633363	0.772435	1.06366
466	0.843232	1.06659	4.95642	1.62333	1.59836	1.31807	1.47457	0.847425	0.947029	0.951913	0.887101	1.4579	1.22813	2.06193	1.27217	1.51081	0.964747	1.56083	4.19653	4.09151	3.79017	0.759048	1.9744	0.879038	0.995901	1.0047	1.32661	0.888246	1.13236	2.28369	1.2054	0.970859	5.38096	0.930553	1.32376	0.833116	3.49394	7.02033	4.46402	1.2347	0.841106	1.21634	0.910262	0.846426	1.70532	0.906872	1.20717	1.35443	3.84733
467	0.958736	0.928709	1.11526	1.67306	1.18081	1.4117	1.78955	0.7143	1.56033	1.24312	0.926309	1.09037	2.74642	2.58543	1.27372	1.67598	1.1569	1.64604	1.32601	1.70606	1.06894	0.600552	1.72427	1.1066	0.998069	0.702694	0.652566	1.0899	3.02817	1.27116	0.874554	0.707011	1.60237	1.31329	0.819483	0.850165	1.43461	1.37482	0.566019	0.704115	0.575594	1.31794	2.18289	0.893575	0.942797	2.00976	3.59384	1.85232	0.731465
468	0.633109	0.860125	0.78034	0.71599	0.881969	0.841035	1.0253	0.774239	1.01944	0.817776	1.03146	0.845666	0.862978	0.749747	0.945764	0.957481	0.978514	1.15912	1.18645	0.859944	0.77459	0.918293	0.92956	1.0542	1.06179	0.874755	1.08477	0.942651	0.960767	0.993318	1.22411	1.03921	0.686791	1.02069	0.955376	0.917264	0.958086	1.25374	0.80235	0.946816	0.861471	0.900535	0.998675	0.908072	0.926867	0.888987	0.986959	0.985747	1.06614
469	1.051	1.5608	1.13887	1.22212	1.41524	1.28263	1.25714	1.01041	1.15238	1.22065	1.16931	1.57229	1.59493	1.12948	1.26334	1.21291	1.18622	1.1463	1.28132	1.31947	1.41936	1.09034	0.982952	1.0106	1.33402	1.36683	1.56603	1.08688	1.42003	1.11999	1.1573	1.09501	1.05154	1.19838	1.35981	1.49272	1.14358	1.56985	1.00952	1.27203	1.02227	1.00823	1.11194	1.02369	1.44757	1.21364	1.01813	1.07781	1.07088
470	0.704719	0.837841	0.970267	0.780435	0.860718	0.930287	1.08315	0.707272	0.788497	0.708163	0.72279	0.661204	0.663614	1.32476	1.0561	0.884756	0.826565	0.973374	6.62306	5.74987	1.10857	0.785333	0.700113	0.983213	1.09505	0.912003	1.14075	0.865401	0.822606	1.05026	0.855543	0.725617	1.20763	0.898634	0.800538	0.650102	1.1018	7.01187	4.78897	0.804359	0.752336	1.09647	0.848259	0.701851	1.04402	0.696025	0.815142	1.21295	1.51801
471	0.965538	0.902661	1.15907	0.971234	0.978101	0.997301	0.999526	1.09846	0.99572	1.30369	1.23887	1.31102	1.38056	0.85118	1.02325	1.06047	1.11138	1.19027	1.10604	1.19761	1.34916	1.22171	1.07425	1.22766	1.17375	0.963764	0.901258	1.11713	1.12962	0.996753	1.06636	1.06183	1.06231	0.991185	0.8865	1.20492	1.247	1.35964	1.1008	1.11186	1.23902	1.19503	1.29598	1.18634	1.02728	1.1348	0.592996	1.30775	1.21088
472	0.766215	1.35191	1.37205	1.269	1.15614	1.23566	1.11108	0.855314	1.0249	1.62334	1.18335	1.35801	1.53095	1.17464	1.40141	1.66958	0.922709	0.760032	0.955702	1.23341	1.30977	0.790476	0.687614	0.964232	1.28706	1.64196	1.41537	1.18871	1.04358	1.01414	1.09824	1.14494	0.887876	1.10225	1.75315	1.23274	1.23197	1.35764	1.02371	1.08485	1.21053	1.03024	1.03823	1.18313	1.38179	1.17488	1.27408	1.04073	1.18194
473	0.89548	0.693593	0.858503	2.79196	2.73161	1.19176	1.7449	1.69758	1.12456	0.694112	0.842589	0.576256	1.65754	1.74759	1.70416	1.71271	1.05603	1.34872	1.64846	1.7357	1.07058	0.985846	1.56479	1.04835	1.49985	0.823683	0.911157	1.04081	2.53662	0.970918	1.09367	1.26646	1.67935	1.32663	0.850162	0.746688	2.25474	1.10967	0.999826	0.653906	0.887904	2.03884	5.2962	1.0068	2.51231	1.57372	2.37254	0.790425	1.03731
474	0.544563	0.78267	0.742695	0.651134	0.828525	0.806905	1.20763	0.749978	1.00726	0.845233	1.07282	0.799898	0.893031	0.697481	0.934998	0.919547	0.964802	1.36382	1.53158	0.814137	0.794928	0.918637	0.899697	0.996031	1.09806	0.867221	1.1523	0.884383	0.922734	1.1534	1.23877	0.940128	0.665184	1.01597	0.96388	0.910611	0.980888	1.5054	0.719741	0.933985	0.873012	0.869057	1.02315	0.879895	0.863881	0.804546	0.931381	1.05116	1.00461
475	1.037	0.997213	0.945004	1.056	1.17253	1.00166	0.907171	0.984756	0.998234	0.907034	0.913024	1.10236	1.09762	0.999854	1.15885	1.03929	0.975348	1.12664	1.09878	1.0593	1.30091	1.17292	1.13703	0.925296	1.13688	1.00472	1.17215	0.94392	1.08842	1.0235	1.19999	0.877192	1.18209	1.02177	1.29676	1.04512	1.02788	1.55592	1.05581	0.818821	0.883828	0.948223	0.953348	0.959589	0.71458	1.42799	1.35388	1.17182	0.939
476	0.98402	0.890613	0.888073	0.778724	0.857586	0.907898	0.737279	0.922178	0.864548	0.809711	0.885211	0.938503	1.03178	1.02105	0.873342	0.962998	0.965083	0.822578	0.802655	0.897876	0.938431	0.951131	0.981776	0.984054	0.954059	0.936254	1.0697	1.04401	0.906505	1.05438	1.10178	0.874102	0.882359	0.933721	0.985169	0.948235	0.941275	1.07884	1.10564	0.952942	0.89349	0.943686	0.957355	0.914651	0.941246	1.15306	1.16928	1.19196	1.01674
477	0.922877	0.883128	0.949979	0.87986	0.969042	0.952426	0.812945	0.858043	0.86253	0.8515	0.939428	1.02096	1.02234	0.924481	0.98236	1.15252	0.940187	0.930678	0.927841	0.973122	1.2147	0.917484	1.18451	0.859805	1.04125	1.00019	0.961362	1.05427	1.04693	1.06047	0.990166	0.961469	1.03249	0.934632	1.01881	0.914483	0.93327	1.14376	1.1762	0.907631	1.02259	0.89169	0.946007	0.938056	0.805594	1.45342	1.114	0.929764	0.970822
478	0.893241	1.01274	1.27749	1.44107	1.36859	0.871252	1.19305	0.839833	0.786648	0.934372	0.842706	1.08257	0.997752	2.09645	1.3552	0.959953	1.00862	2.23698	3.06443	2.81992	1.28324	0.639024	2.30235	0.822262	2.3213	0.863756	0.807091	1.0997	1.29119	1.63891	0.928224	0.736739	2.12456	0.90308	0.828092	1.04308	0.718847	1.11315	1.18867	1.28934	0.849839	1.17525	1.53453	0.884831	1.31285	0.8285	1.44148	0.7106	0.828588
480	1.12159	1.18326	1.01597	0.917637	0.982681	1.08663	0.80996	1.07122	1.13058	0.781621	0.962261	1.20921	1.54048	1.22193	0.811387	1.01136	1.04862	1.18295	1.18786	0.989549	1.41764	0.701706	0.766314	0.974688	1.08564	1.36098	1.05153	1.22944	1.1788	1.23889	0.99097	0.85012	0.995293	0.976641	1.17088	0.964781	0.934759	1.06934	0.688693	0.832779	0.839929	1.09525	0.941472	1.06935	1.17443	1.67996	1.36696	0.733689	0.855766
481	0.94779	1.20951	1.06456	1.05096	1.26516	1.11502	1.01992	0.861898	1.12882	1.20555	1.28086	1.44709	1.26825	0.934512	1.22568	1.20746	1.25887	1.07888	1.12804	1.10152	0.971687	1.16704	1.08617	1.07888	1.10564	1.02709	1.37914	1.00244	1.1973	1.04261	1.13225	1.22004	0.926741	1.01388	1.21128	1.36032	1.12145	1.23386	1.06092	1.10622	1.17576	1.19985	1.1769	1.1393	1.21799	1.03402	0.751414	1.24464	1.04538
482	1.31463	2.1412	1.48411	1.76083	1.99272	1.49804	1.41807	1.3029	1.50187	1.46012	1.33546	1.90257	3.90127	1.41127	1.09008	1.19898	1.47105	1.99569	1.96006	1.52862	3.63024	1.17677	0.989708	1.16482	1.74846	2.04774	1.91035	1.49956	1.84621	1.76034	1.10366	1.13896	1.56991	1.62732	1.69517	1.61937	1.6016	1.29474	0.886276	1.36431	1.16947	1.40569	1.35484	1.23804	1.61075	1.46061	1.32087	1.08012	1.73174
484	0.835939	0.763028	0.484884	0.528548	0.677401	0.671042	0.652961	0.89264	0.729442	0.617469	0.713874	0.822118	1.33392	0.726182	0.806096	0.547373	0.577882	0.744494	0.791387	0.698275	0.674922	0.96703	0.829174	0.679215	0.919788	0.943064	0.659986	0.833742	1.01275	0.952626	0.778532	0.823207	0.626633	0.736522	0.657438	0.860975	0.607428	0.850207	0.812422	0.693202	0.896638	0.695405	0.822289	0.840721	0.760974	1.10262	0.935104	0.597103	0.921594
485	0.759019	0.976963	0.870054	0.910195	0.968955	0.997346	1.0631	0.808392	0.988781	0.835588	0.943753	1.00773	1.0213	0.848704	1.0023	1.06334	0.964845	1.56223	1.31177	0.92844	1.08547	0.978332	0.93512	0.887941	1.08396	0.95162	1.12853	0.993311	0.973521	1.40695	0.956082	0.977202	0.784513	0.889644	0.995363	1.13303	0.89647	1.08643	0.843641	1.15178	0.899922	0.887122	0.965675	0.885928	0.979223	0.927736	0.927338	1.00963	0.95913
486	1.00856	1.131	0.989602	0.756408	0.81048	0.980728	0.794175	0.997887	1.00193	0.740559	0.883956	1.11096	1.55758	1.19728	0.763584	1.05735	1.0103	1.041	1.14715	0.889934	1.19252	0.840855	0.812313	0.983835	1.00249	1.48706	1.14629	1.1235	1.16735	1.10904	1.03147	0.762951	0.898183	0.899289	1.31037	0.874341	0.90634	1.05688	0.675728	0.777527	0.932869	1.03864	0.873072	1.01871	1.16475	1.61609	1.08751	0.727517	0.882214
487	0.880442	1.0968	0.939558	0.64319	0.758674	0.883282	0.86264	0.919294	0.918154	0.645182	0.827272	1.01011	1.4789	1.14018	0.794489	0.934934	0.88894	0.912149	0.980935	0.777815	0.886604	0.954948	0.671433	0.964794	0.844226	1.54736	0.971479	0.982335	1.0043	1.12495	0.945242	0.993924	0.816705	0.702196	0.883584	0.713811	0.785437	1.08402	0.825129	0.809758	1.01978	0.885116	0.811486	0.969225	1.01497	1.58742	1.04909	0.745837	1.0946
488	0.693047	0.769816	0.814564	3.2294	2.66353	0.751833	1.71877	0.595865	1.25249	0.791244	0.759465	0.989748	1.42395	1.37484	1.28021	1.34872	0.738639	1.46008	1.63681	1.76073	1.04672	0.776364	1.01418	0.574976	1.37731	0.498018	0.813328	0.812909	3.0737	1.38576	1.11468	1.09834	1.60659	0.871605	0.842404	1.02046	1.36926	1.02191	0.85703	0.661456	0.747905	0.658166	1.83946	0.756236	1.28966	1.77438	3.81361	1.00328	0.886855
490	0.951538	1.24563	1.07477	1.08867	1.33345	1.18058	1.05167	0.849794	1.15132	1.23828	1.35198	1.48982	1.36714	0.946422	1.30262	1.22504	1.27156	1.12603	1.21678	1.13242	1.05405	1.20469	1.11614	1.0878	1.13395	1.12799	1.4719	1.00689	1.25376	1.05562	1.17534	1.28342	0.935917	1.04109	1.26059	1.40833	1.14855	1.28704	1.11154	1.15113	1.1999	1.27375	1.19449	1.1645	1.22753	1.02833	0.7298	1.28922	1.0689
491	0.754387	0.898644	0.819534	1.02364	0.988096	0.962394	1.15675	0.775496	0.951189	0.846105	0.98566	1.14647	1.21667	0.912355	0.992119	1.06949	1.06053	1.49417	2.0714	1.03785	1.15898	1.01869	0.815609	0.887291	1.26961	0.757335	1.20179	1.08113	1.20259	1.76206	1.33988	0.853693	0.806441	0.990718	1.0995	0.981084	0.878621	1.19344	0.946437	1.12954	0.979464	0.972573	1.08586	0.852345	0.90215	0.934251	0.76879	1.05422	0.889496
492	0.833417	0.850678	1.03533	1.0698	1.19621	0.739798	0.831733	0.848729	1.01774	0.918609	1.23339	0.699334	0.883567	1.01236	0.983125	1.03152	0.685727	1.56543	5.4304	3.3951	1.01772	0.744656	0.740865	0.814581	1.24164	0.560529	0.861664	1.30539	1.02739	1.12298	0.946006	0.736098	1.35199	0.896268	1.32787	1.23069	1.11781	2.39389	1.98606	0.833797	0.708764	1.06008	1.24229	1.31721	1.16588	1.01106	1.52241	0.828899	0.643684
493	0.590131	0.950295	1.0635	0.571023	0.787411	1.08572	1.07973	0.950054	0.925744	1.13438	1.51208	1.07987	1.85733	0.733591	0.891082	1.02382	1.11338	1.48342	1.66827	0.963195	0.871521	1.05991	1.10144	0.900852	1.17139	1.52315	2.06203	0.676993	0.734259	1.42234	1.13166	1.07766	0.879183	1.63171	1.07617	1.04624	1.64288	1.31658	0.969978	1.03962	0.878548	1.36045	1.03674	1.07513	0.896138	0.800603	0.959447	1.04767	0.949181
496	0.933507	1.15492	1.00573	0.959939	1.0802	0.982661	0.952267	0.873366	1.06579	1.04261	1.08578	1.29111	1.14476	0.889179	1.08606	1.11654	1.14717	0.997037	0.99071	1.03518	0.924177	1.04212	1.01739	1.092	1.01791	0.970313	1.2106	0.993102	1.1351	0.963529	1.02358	1.16293	0.861267	0.939996	1.07216	1.19748	1.0124	1.15208	0.911684	1.01597	1.03405	1.13899	1.08233	1.0609	1.18177	1.06742	0.838019	1.15055	1.02017
498	1.01039	1.56872	1.01063	0.892164	1.01437	1.55729	1.05944	0.970224	1.11902	1.49493	1.14764	0.45976	1.02755	0.809771	0.915618	0.721538	0.852071	1.31074	0.667245	0.579905	1.24565	1.01611	1.30966	1.05631	0.666846	1.24152	0.622465	1.44106	0.708139	0.641689	0.765297	1.20229	0.580968	1.05054	0.781218	1.33448	0.577227	0.788041	0.919725	1.05407	0.853656	1.10609	0.646022	1.35187	1.4015	0.723415	0.663961	1.41592	0.69112
499	1.07829	0.962508	0.766709	0.823906	0.688931	0.693092	0.753878	1.70561	1.1205	0.771111	0.704776	0.91498	0.817976	1.07096	0.946333	0.998192	0.893275	0.898918	0.732907	0.830972	0.779989	0.867306	0.856592	1.28399	0.848524	1.37447	0.736608	1.30004	0.925316	0.837562	1.15804	1.05921	0.899977	0.935243	0.884892	0.836654	0.772701	0.699256	0.730336	0.867191	0.872404	1.04529	0.848673	0.763976	0.879059	1.4329	1.77087	0.721111	0.99389
500	2.05352	1.48992	0.751323	1.59609	0.920938	0.89763	1.27367	1.20686	0.828349	0.899588	0.634226	0.986891	0.830354	1.31508	0.891098	0.932354	1.27872	0.754509	0.622222	1.2294	0.84642	0.964275	1.02161	1.19437	1.07031	1.0245	1.03922	1.7296	1.00565	0.763353	1.46644	0.887454	0.91655	0.972818	0.840047	0.785057	0.711534	0.891586	1.06935	0.823134	0.941656	0.738736	0.930694	0.691887	1.35409	1.02835	1.06871	1.00376	1.57236
501	1.94801	1.45614	0.77056	1.4826	0.8125	0.913408	1.27121	1.28416	1.08564	0.968702	0.621137	1.01953	0.937993	1.47245	0.849974	1.0508	1.31052	0.96637	0.711831	1.70107	0.810288	1.02447	0.950675	1.24335	1.12854	1.30464	1.0418	1.88388	1.10726	0.764388	1.31404	1.09345	1.13293	1.01756	0.837645	0.862766	0.633991	1.19319	1.32815	0.762162	0.941008	0.706316	1.06108	0.659453	1.34713	1.20367	1.21091	0.849929	1.56604
502	1.05081	0.956802	0.717829	0.918456	0.735983	0.969746	0.935855	0.907418	0.885783	1.0071	0.843777	0.884726	1.019	1.04935	0.865761	0.904622	0.826616	0.708494	0.698269	1.34037	1.06621	0.88451	0.771418	0.854169	1.06607	0.725755	0.832841	1.6391	0.910954	1.152	1.51408	0.927072	0.857326	0.994403	0.626589	0.855613	0.754991	0.765787	1.21279	1.00627	0.978302	0.563806	0.8961	0.753351	1.34373	1.13511	0.849995	1.09139	1.39889
503	0.711133	0.826385	1.17457	0.816365	0.892567	0.815185	1.00554	0.627273	3.43565	0.769743	0.771932	0.72077	0.687975	0.692942	0.854099	0.793957	0.588017	2.73065	3.6299	3.07209	1.40772	0.583478	1.63171	0.51655	0.943887	0.522859	0.65838	0.821157	0.841044	1.88849	0.741417	0.552678	1.86364	0.641682	0.920134	0.955963	1.42294	1.31405	0.879595	0.870152	0.627718	0.541482	0.814099	0.73837	0.981128	1.00212	1.25322	0.66156	1.39616
505	1.01039	1.309	1.16192	1.14676	1.43973	1.27632	1.09037	0.908393	1.24256	1.2772	1.48747	1.61965	1.68037	0.960108	1.3658	1.24844	1.3385	1.24876	1.33642	1.18052	1.25281	1.31988	1.14411	1.18843	1.23448	1.17366	1.59775	1.05914	1.32017	1.16008	1.19007	1.34259	0.980509	1.08865	1.35588	1.44546	1.26337	1.32317	1.15764	1.14658	1.28271	1.35185	1.22587	1.23701	1.31544	1.08603	0.832909	1.3514	1.14833
506	0.832892	1.02668	0.881692	0.874443	0.914529	0.981104	0.95369	0.950518	0.81175	0.880314	0.941257	0.925304	0.95058	0.8338	0.980859	0.96748	0.688819	0.683482	0.727005	0.911379	0.797686	0.976783	0.865389	0.821942	1.0053	0.72198	1.01097	1.33457	0.902364	1.17546	1.28737	0.893367	0.835663	0.97825	0.786321	0.851641	0.886448	0.804626	1.0361	1.18253	1.092	0.709222	0.845323	0.979405	1.16124	1.22784	0.946812	1.04151	0.949448
507	0.655012	1.1052	0.937161	0.920533	0.999913	1.00105	1.02211	0.844372	0.801077	0.936014	0.930465	1.08895	0.94802	0.892802	0.919032	0.986071	0.681106	0.636613	0.760419	0.921436	0.850255	0.983148	0.87553	0.866953	0.956664	0.820407	0.952015	1.09853	0.960802	1.17461	1.12219	1.01623	0.777444	0.984919	0.808659	0.889642	0.872299	0.95241	0.980936	1.1568	0.957094	0.729526	0.873406	0.945614	1.07215	1.11611	0.847146	1.05777	0.832531
508	0.662119	1.19525	1.0908	0.458338	0.524163	0.789497	3.37013	0.515363	1.87193	1.56393	0.829435	1.04779	1.89877	3.65298	1.23641	0.823301	0.702952	1.6147	2.84763	2.30085	0.90813	0.686311	2.47346	0.697033	1.33275	0.903689	0.818959	0.805404	0.867323	1.24516	0.89525	0.637136	1.54497	0.92785	0.925154	0.922439	1.73885	1.03939	0.60606	0.722824	0.98184	0.794294	1.79866	0.715874	0.793188	2.36462	2.01211	0.604229	0.751611
509	1.00313	0.885383	0.767457	0.747482	0.65608	0.666309	0.772784	1.50793	1.05952	0.753014	0.673941	0.85901	0.808258	0.981926	0.966324	0.942014	0.833908	0.79734	0.659109	0.783932	0.739807	0.880847	0.844276	1.16527	0.838664	1.26108	0.662863	1.24442	0.903369	0.724839	1.0916	1.00168	0.870343	0.858801	0.811029	0.771421	0.760977	0.697632	0.751077	0.884195	0.881078	1.04713	0.849184	0.80811	0.846592	1.40773	1.74508	0.816381	0.949731
510	2.27786	1.64719	0.86181	1.7875	0.962268	0.937362	1.31468	1.2604	0.886507	1.13742	0.76902	1.29642	0.994317	1.31535	0.888154	1.06142	1.57873	0.985555	0.702523	1.45727	0.760719	1.09896	1.05691	1.17318	0.770841	1.11065	1.16584	1.03826	1.0767	0.645998	0.984864	1.13191	0.938247	0.974817	0.763813	1.01256	0.711867	0.95938	1.10346	0.847512	1.05352	0.691778	1.01281	0.738864	1.71604	1.17961	1.08119	0.880477	1.64293
511	1.11197	1.02533	0.749258	0.891564	0.727352	0.779284	0.746008	1.8365	1.12314	0.810792	0.722751	1.04825	0.989927	1.08158	0.889189	1.00074	0.918988	0.93367	0.837649	0.900334	0.934986	0.839422	0.86417	1.37866	0.85871	1.45771	0.769793	1.27921	1.02948	0.918625	1.09182	1.05718	0.959509	0.92595	0.884228	0.857866	0.809988	0.756634	0.73669	0.812643	0.91036	1.05478	0.884235	0.75707	0.896886	1.32206	1.67403	0.718604	0.982347
512	1.06513	0.941473	0.723958	0.804423	0.649617	0.674828	0.737402	1.91703	1.13238	0.744222	0.66371	0.8975	0.80623	1.07484	0.88865	0.945488	0.86207	0.887438	0.710522	0.80743	0.754345	0.791011	0.838292	1.35679	0.831083	1.43949	0.694607	1.24192	0.925011	0.811661	1.14567	1.0394	0.935702	0.888754	0.864897	0.796288	0.73946	0.668997	0.714633	0.819412	0.861885	1.02908	0.846881	0.728629	0.85589	1.42417	1.8365	0.703577	0.952307
513	0.66969	1.29349	1.11269	1.08762	1.25601	1.06896	1.05973	0.867891	0.764045	1.06831	0.964346	1.04536	0.956895	0.955686	0.970612	0.960089	0.701915	0.692174	0.844776	0.880619	0.855526	1.003	0.790008	0.823713	0.975919	0.924355	1.13473	1.04769	0.925301	0.945772	1.20346	0.865289	0.743505	0.887218	0.839326	1.01312	0.979861	0.860984	0.848206	1.16521	0.910832	0.717154	0.918557	0.995856	1.10813	1.11629	0.951423	1.03269	0.825766
515	1.05898	1.07492	1.04361	0.926327	1.05094	1.06871	0.97685	0.972471	1.1794	1.0065	1.12726	1.18168	0.860546	0.957254	1.19424	0.868425	1.11778	0.840052	0.829566	0.990998	0.954823	1.49696	1.31504	1.0869	1.07553	1.06153	1.01899	1.1502	1.09991	0.91256	1.12465	1.49591	1.01192	0.96631	1.02407	1.08409	0.851804	0.755033	1.51183	1.15978	1.07553	0.979895	1.02573	1.06585	1.16326	1.06894	0.958911	1.21024	1.09181
516	0.968656	0.959211	0.887566	0.809632	0.906034	0.897265	0.869716	0.886067	0.861384	0.782855	0.876832	0.916841	0.697393	0.854506	0.812966	0.890079	0.870378	0.819382	5.66408	4.64656	0.897149	0.612555	0.712695	0.853575	0.853427	0.807849	0.850619	0.839156	0.756866	0.963711	0.832018	0.640051	0.897431	0.913026	0.790011	0.821126	0.939141	1.36011	0.950356	0.821382	0.656434	0.826811	0.779944	0.853434	0.962702	0.913615	0.866082	0.700712	0.822937
517	1.22659	1.34394	0.948619	1.39445	1.30539	1.14452	1.04535	1.179	1.0738	1.23906	1.02124	1.5236	1.15992	1.32897	1.06167	1.2702	0.951784	0.97961	1.05539	1.31098	1.11644	1.09352	0.752379	1.01237	0.964181	1.46558	1.10485	1.15217	1.33647	1.00434	1.11949	1.07375	1.02743	0.982868	1.15287	1.18136	0.933082	1.08014	0.953713	1.15663	0.999113	1.07579	1.08246	1.00131	1.20973	1.49073	1.23968	0.873947	0.996232
519	0.988606	0.912366	0.804455	0.783555	0.699264	0.720968	0.803029	1.25903	1.0372	0.779612	0.729373	0.864895	0.877814	0.979576	0.960728	0.949608	0.831158	0.767424	0.653604	0.83585	0.806736	0.871606	0.81113	1.09774	0.879343	1.22579	0.725905	1.19369	0.893442	0.733811	1.06285	1.02061	0.886451	0.840982	0.844732	0.822326	0.810584	0.729577	0.766071	0.90868	0.900845	1.04899	0.88453	0.826835	0.888088	1.45351	1.66793	0.867829	0.912594
520	0.871009	1.12466	0.882886	1.16408	1.01752	1.04788	1.07718	0.941694	0.722657	0.925198	0.867014	1.11285	1.13695	1.08041	0.944244	1.08196	0.865697	0.529325	0.76955	0.876911	0.890546	0.931217	0.954258	0.998869	0.877206	0.917849	0.973345	0.84358	0.842524	0.986629	0.985988	1.08132	0.965496	1.29238	0.933453	0.921811	0.822767	1.01441	1.05767	1.16415	0.958033	0.694933	0.852694	0.813927	1.09529	0.994395	1.10816	1.05216	0.879133
521	1.01361	0.652625	0.737165	0.534291	0.556937	0.539317	0.690839	1.04509	0.739058	0.536882	0.57357	0.559518	0.451812	0.719715	0.521299	0.70319	0.71517	0.570023	0.355128	0.607262	0.537149	0.59203	0.616138	0.86436	0.607834	0.861992	0.548626	0.976091	0.556512	0.736196	0.814675	0.680778	0.872224	0.574243	0.592156	0.542635	0.572966	0.608088	0.608585	0.554704	0.610959	0.746333	0.759888	0.711234	0.529876	0.96715	0.945931	0.777264	0.836463
522	1.13477	0.792454	0.801144	0.749383	0.766314	0.687806	0.691347	1.0867	0.808366	0.691347	0.734097	0.773358	0.57346	0.940779	0.630235	0.849432	0.820529	0.629113	0.480762	0.747185	0.644399	0.668886	0.649888	0.888547	0.655295	0.930929	0.614182	1.01979	0.743974	0.629554	0.852856	0.76146	0.897811	0.709034	0.706112	0.695273	0.700718	0.515404	0.565762	0.741187	0.693482	0.85074	0.857747	0.838566	0.690621	1.12627	1.08889	0.674035	0.881724
523	1.14013	1.02075	0.880755	1.06502	1.01429	0.877211	0.844707	1.25798	0.966407	0.933874	0.884455	1.08047	0.813275	1.10165	0.850256	1.0363	0.856491	0.802528	0.693974	0.982951	0.859698	0.88016	0.705192	1.00614	0.867109	1.15386	0.849244	1.13564	1.03602	0.79636	1.00771	0.905565	0.938091	0.822356	0.942236	0.916921	0.797829	0.81016	0.771257	0.951445	0.869006	0.984676	0.995994	0.936992	0.908596	1.30989	1.22483	0.797623	0.926189
524	0.861696	1.11788	0.841402	1.23184	1.11459	1.29764	0.975751	0.939888	0.752048	0.93041	1.01314	1.19652	1.16396	1.1319	0.918796	0.970441	0.710255	0.664999	0.859079	0.887508	1.00335	0.896448	0.796157	0.8413	0.999938	0.956175	0.98031	0.879634	0.943347	1.42343	1.15102	1.01167	0.952481	1.09943	0.850767	0.920797	0.985983	0.929749	0.92331	1.36947	0.903027	0.720629	0.872974	0.796093	1.11433	1.19858	1.17869	0.96254	0.873734
525	0.7557	1.32535	1.15572	1.03418	1.16466	1.04125	1.14393	0.810138	0.869323	1.04838	0.964015	1.20432	0.936139	1.02456	1.18077	1.06906	0.787692	0.794108	1.12606	0.896495	0.917115	1.0047	0.889139	0.838935	0.955472	0.989969	1.14518	1.08315	1.00305	1.16197	1.31334	1.01553	0.957627	0.971967	0.90736	1.02855	1.00153	1.27368	0.948044	1.31988	0.932885	0.782287	0.822686	0.909704	1.12648	1.17676	1.11049	1.05	0.893445
526	0.752663	1.10156	0.935089	1.05724	1.06064	0.936428	1.15435	0.773896	0.748581	0.903041	0.858428	1.09371	1.02156	0.981121	0.968216	1.00719	0.778958	0.687856	1.03213	0.845122	0.872032	1.01336	0.841652	0.797298	0.82964	0.955752	1.06087	0.853079	0.919974	1.06486	1.07527	0.981975	0.905256	0.881508	0.943247	0.875382	0.844016	1.06169	0.864107	1.1276	0.9234	0.701762	0.840631	0.879617	1.07334	1.0226	1.0365	0.937312	0.803117
527	0.813546	1.05933	0.945434	0.952206	0.957312	0.932492	1.11964	0.910143	0.792045	0.868255	0.888935	1.04543	1.01818	1.01375	0.878213	0.916711	0.862786	0.955249	0.872695	0.918289	0.860258	0.972364	0.785236	0.946904	0.823231	0.927828	1.02485	0.765856	1.01009	1.05694	1.09835	0.80685	0.884588	0.980999	0.95215	0.917551	0.945035	1.41049	0.915672	1.04341	0.809111	0.719139	0.759796	0.878858	1.00154	0.94884	0.871967	0.725943	0.861686
528	0.827157	0.843872	1.24914	0.74468	0.818581	0.733955	1.13447	0.693321	1.88069	0.743066	0.818663	0.761253	0.700999	1.009	0.787266	0.797535	0.61523	2.16859	3.39777	2.9777	1.1963	0.59697	1.18138	0.570228	1.77753	0.569474	0.661176	0.840351	0.908901	1.51998	0.792014	0.570894	2.49134	0.717744	0.934653	0.892638	1.08544	1.15717	0.835639	0.877801	0.714442	0.598012	1.40376	0.744392	0.966146	0.880825	1.34639	0.518211	1.28536
529	0.987228	1.13789	0.95296	0.99412	1.11233	0.96896	1.14313	1.0247	1.22029	1.00638	1.10233	1.16004	1.20132	0.951369	1.16967	1.159	1.12816	1.12036	1.25189	1.09464	1.18735	1.11376	1.05573	1.07861	1.09724	1.10775	1.13624	1.10101	1.16869	1.28973	1.12896	1.33295	0.874705	0.961939	1.21024	1.1741	1.03134	1.22959	1.03262	1.04166	1.04499	1.08689	1.15653	1.13563	1.32682	1.24804	1.20876	1.25953	1.06715
530	0.864964	1.19299	0.946153	1.20982	1.03905	1.05909	1.16116	0.864076	0.777042	0.924662	0.962093	1.14835	1.0488	1.03946	0.971164	1.00622	0.801094	0.570954	0.873761	0.796769	0.922559	0.985582	0.898231	0.926139	0.9656	0.897234	1.0411	0.852479	0.828349	1.0103	1.11878	1.07143	0.677172	1.03097	0.958419	0.874987	0.902468	0.994549	0.932755	1.16968	0.912155	0.70407	0.851741	0.900473	1.05429	1.02232	1.10785	1.19432	0.824604
531	0.993988	1.01873	0.922855	1.12323	1.0381	1.08649	1.12153	0.979514	0.752986	0.830678	0.836358	1.18014	1.23858	0.831151	0.9309	1.11755	0.999819	0.68128	0.675674	0.872035	0.799589	0.833154	0.791595	1.09793	0.930449	0.95954	1.04868	0.752071	0.878718	0.899177	0.957659	1.0253	1.0069	1.30974	0.956162	0.795705	0.922986	0.940536	0.86157	1.12237	0.89016	0.845276	0.83134	0.872218	0.87005	0.917963	0.930245	1.08444	1.1203
532	1.08435	0.937508	0.94528	0.901428	0.917593	0.951707	0.868667	1.10259	0.801016	0.882934	0.896024	1.05486	0.894998	0.789392	0.811451	1.06878	1.07264	0.656994	0.68534	0.935825	0.780063	0.662192	0.735974	1.05989	0.800892	0.948929	0.928006	0.814468	0.890463	0.739197	0.852059	0.773599	1.04656	1.14505	0.794834	0.841443	0.78158	0.80668	0.738305	0.85722	0.747745	0.998253	0.821009	0.893522	0.890902	0.829829	0.722476	0.737875	0.860947
533	0.88438	0.875058	2.8486	0.812762	0.891709	0.766322	0.957682	0.795607	0.895154	0.818789	0.845726	0.825907	0.642239	0.779002	0.863669	0.838979	0.748245	1.92375	5.03547	4.88687	1.68483	0.563266	1.30591	0.662138	0.897683	0.637837	0.75025	0.87281	0.828772	1.94812	0.733765	0.558809	3.01005	0.757283	0.869975	0.860953	2.49708	1.51867	0.902956	0.797607	0.631211	0.694755	0.73396	0.828098	0.992454	0.933386	1.03982	0.707976	1.70187
534	1.16581	1.13399	0.904381	0.960881	0.887676	0.819979	0.976558	1.29694	1.11405	0.966961	0.889568	1.11865	0.871432	1.08113	0.959825	1.10447	1.13941	0.841861	0.730352	0.864593	0.927473	0.845287	0.905126	0.918361	0.998498	1.10609	0.922233	1.1668	1.00349	0.828761	1.03294	0.867573	1.09173	0.928931	1.00721	1.09958	0.848186	0.940867	0.79439	0.959634	0.988107	0.865334	1.11807	1.04618	1.04882	1.28779	1.2812	0.849298	1.02583
535	1.24452	0.996008	4.16976	4.80426	4.8616	3.87366	1.7351	1.03567	0.916593	0.706565	0.78195	1.25232	0.847537	2.2178	1.95553	0.767547	0.780868	1.11475	4.59449	4.59708	2.95176	2.92148	0.800645	0.713059	2.15772	0.77454	0.779074	0.897992	1.38636	1.35269	1.31459	0.684806	0.917128	0.753798	0.877198	0.720448	2.10173	5.74898	5.06804	0.874615	1.93752	0.964779	1.81677	1.04613	1.05977	2.3621	1.81199	1.35247	0.970381
536	1.32631	0.996306	0.890703	1.03138	0.841412	0.798615	0.924835	1.48491	1.12486	0.882097	0.819806	1.08859	0.806002	1.09447	0.985866	1.08413	1.09195	0.816594	0.702804	0.804654	0.918827	1.01418	1.00759	0.848718	0.990926	1.06539	0.782817	1.14684	0.985803	0.894619	0.986381	0.998483	1.1383	0.902238	0.962806	1.03687	0.753573	0.83138	0.866167	0.934849	0.954007	0.707519	1.07666	1.00432	1.07077	1.42127	1.48041	1.01408	1.12101
537	1.18322	1.20712	1.00749	1.07385	1.0569	1.00689	0.900328	1.06775	1.14361	1.00289	0.981312	1.15748	1.2157	0.966409	1.20786	1.08399	1.07089	1.20283	1.26039	1.15741	1.13083	1.2316	0.972443	1.17134	1.06237	1.1604	1.13319	1.07146	1.28644	1.2894	1.09418	1.30144	1.10678	0.993624	1.23181	1.11544	1.03297	1.13889	1.01046	1.0424	1.15466	1.06856	1.08814	1.15901	1.47631	1.4532	1.258	0.912457	1.06984
538	0.947255	1.18241	0.913031	1.15275	1.21066	0.995021	0.97742	0.948577	1.17953	1.07114	1.16741	1.21397	1.15571	0.93848	1.1544	1.16281	1.09414	1.26582	1.45987	1.13591	1.25787	1.11516	1.01527	0.964926	1.09181	1.04952	1.14913	1.04485	1.26228	1.61557	1.15872	1.33886	0.893386	0.973164	1.19907	1.27502	0.996053	1.37172	1.01982	1.0683	1.02832	1.08358	1.23355	1.13031	1.29999	1.23373	1.22123	1.13676	1.07502
541	0.963461	0.954987	0.834254	0.827695	0.769146	0.763141	0.830465	1.09007	1.03579	0.817077	0.776449	0.931383	0.927154	0.965626	0.978234	0.953973	0.842065	0.744962	0.628497	0.852702	0.860362	0.893332	0.828205	1.02519	0.91018	1.21476	0.780524	1.1555	0.898536	0.709185	1.02908	0.987966	0.913814	0.868321	0.864805	0.853983	0.863274	0.75827	0.806621	0.926688	0.931999	1.04382	0.924941	0.855613	0.930057	1.46352	1.58643	0.902106	0.894986
543	1.15796	1.10098	0.930327	0.893249	0.887667	0.920465	0.908501	1.04654	1.1034	0.842832	0.938932	1.05143	0.954231	0.946789	1.02853	0.973251	1.03679	0.910259	0.90487	0.940171	0.98493	1.13094	1.07178	1.16872	1.04589	1.13356	0.910183	1.13947	1.03387	1.045	1.07957	1.22393	1.07984	0.974109	0.991934	0.949128	0.94639	0.853655	1.13098	1.13031	1.04474	1.00633	1.02422	1.04396	1.11653	1.38111	1.26708	1.04393	1.17263
544	1.04311	1.00626	0.903178	0.878134	0.89371	0.843568	0.898167	0.976377	0.885307	0.85131	0.803126	1.00448	0.949709	0.937373	0.821767	0.826032	0.935107	0.855597	0.637233	0.897522	0.872771	0.81129	0.785208	0.88064	0.765555	1.11782	0.877218	0.934891	0.891832	0.830132	0.876475	0.839207	0.957396	0.82686	0.881292	0.916456	0.765025	0.765593	0.834169	0.827289	0.821802	0.8859	0.814121	0.807792	0.945158	1.22059	0.849146	0.796584	0.884979
545	1.31632	0.925287	0.840789	0.963432	0.765384	0.711889	0.91074	1.5077	1.10478	0.801623	0.761473	0.99833	0.756637	1.07431	0.963169	0.9999	1.03949	0.761205	0.65235	0.757255	0.903338	1.02916	0.994719	0.849267	0.956498	1.01383	0.724145	1.14409	0.923789	0.844273	0.970327	0.966793	1.06236	0.84963	0.883959	0.974309	0.694516	0.764782	0.814096	0.888152	0.91971	0.671048	1.04236	0.947044	1.01333	1.43375	1.59147	0.957575	1.09208
546	1.14467	1.00708	0.920581	0.816718	0.771427	0.795288	0.857945	1.13326	1.11096	0.788003	0.770083	0.973771	0.919944	0.907833	0.970379	0.906366	0.99819	0.880901	0.783353	0.820361	0.980947	1.13257	1.03011	1.18132	0.957068	1.16895	0.841669	1.14277	0.973325	0.954559	1.04482	1.16413	1.125	0.92944	0.970036	0.852779	0.890936	0.811986	1.09473	1.07103	1.03637	0.937668	0.970982	1.02111	1.03176	1.4663	1.40536	1.07026	1.1473
548	1.30668	0.874221	0.80673	0.915012	0.75315	0.659151	0.901637	1.4474	1.11738	0.744358	0.721038	0.937434	0.725153	1.00731	0.98567	0.940829	0.956252	0.737578	0.626945	0.727061	0.87646	1.03496	1.05611	0.863921	0.953365	0.968853	0.686966	1.12283	0.888834	0.810942	0.900599	0.998733	0.986501	0.798594	0.798073	0.942655	0.642336	0.696697	0.805792	0.850005	0.907421	0.712271	1.00528	0.902977	0.957363	1.45708	1.55596	0.93753	1.07322
549	1.15421	0.941726	0.746195	0.752963	0.83797	0.614293	0.855099	1.22137	1.03393	0.896026	0.746426	0.93955	0.662742	0.736331	0.976653	0.758323	0.820196	0.707038	0.810083	0.73034	0.882298	1.09274	1.53367	0.846588	0.941164	1.09238	0.813484	0.949711	1.0343	0.847601	0.946182	0.970791	0.981395	0.637857	1.00589	0.929086	0.607486	0.665409	0.931065	0.915378	0.859899	0.659384	0.866383	0.810148	0.958339	1.37355	0.930556	0.967998	1.04692
550	0.958138	0.974637	0.862312	0.882992	0.839067	0.789968	0.873647	0.985759	1.05824	0.877424	0.833485	0.969109	0.938693	0.942351	1.02143	0.95228	0.842992	0.771298	0.666092	0.889793	0.891779	0.905978	0.808313	0.954599	0.945007	1.23131	0.828554	1.13685	0.931551	0.744117	1.02088	0.976418	0.914673	0.886774	0.900781	0.905964	0.895092	0.807041	0.856678	0.94586	0.970808	1.05182	0.982441	0.872657	0.940644	1.51857	1.52328	0.942046	0.925437
551	0.883388	1.0067	0.848359	0.58727	0.908167	0.91823	0.847398	0.620902	1.1529	0.784901	1.23286	1.05231	0.703455	0.756416	1.1892	0.600499	1.08984	0.81602	0.792742	0.996378	0.857167	1.93057	1.20986	1.4051	1.01942	0.839835	0.903612	1.25572	0.938714	0.728916	0.976649	1.69166	0.861721	0.820153	0.639574	1.08802	0.857926	0.576934	1.69176	1.22337	0.857144	1.19196	0.885606	1.14096	1.09114	0.796487	0.456418	1.3578	1.08744
552	1.33685	1.0596	0.923056	1.07334	0.916624	0.887213	0.970174	1.41566	1.12383	0.983655	0.905279	1.17607	0.834093	1.09124	1.03163	1.10581	1.16443	0.838729	0.743482	0.87294	0.918235	1.04333	1.04485	0.832352	1.01366	1.07952	0.842243	1.13449	1.02972	0.969464	1.01326	1.02415	1.19036	0.939324	1.01678	1.13383	0.80507	0.870089	0.904533	1.0053	1.00061	0.714458	1.1232	1.04635	1.10776	1.37278	1.30928	1.08035	1.13899
553	0.39191	0.506656	0.601397	0.572268	1.04674	0.656388	1.29334	0.347918	1.02971	0.446412	0.861853	0.738938	1.06835	0.424844	1.42765	0.970668	0.436529	0.816542	0.98557	0.829329	0.710691	1.53555	0.987999	0.660236	1.0083	0.692235	0.700018	0.691062	0.850135	1.06284	1.37277	1.10828	0.429921	0.86553	0.76574	0.813763	0.705264	1.41763	1.47958	0.861242	0.833474	0.804966	0.832974	0.710706	0.842587	1.32581	0.8845	1.46389	0.555453
555	1.32738	1.12785	0.969435	1.15058	1.02523	0.991346	1.0444	1.32073	1.14273	1.09871	1.03981	1.31491	0.889956	1.10046	1.0904	1.14203	1.22808	0.868645	0.808943	0.953408	0.93661	1.08488	1.06882	0.818493	1.05593	0.980528	0.937125	1.10254	1.07589	1.02678	1.02535	1.07954	1.21727	0.980754	1.07506	1.25395	0.877194	0.916239	0.977634	1.07851	1.02489	0.72688	1.18646	1.11594	1.17411	1.28922	1.1024	1.1658	1.14568
556	0.87381	0.87663	1.33979	0.416706	0.467926	0.699631	1.5697	1.05117	1.42222	0.774293	0.784866	0.809257	1.54116	0.697526	1.07776	0.798293	0.826628	1.32882	2.08145	1.67219	1.05772	0.542882	0.95212	0.433618	1.34183	0.676252	0.556812	0.809951	0.844257	1.24991	0.738336	0.644384	1.46543	0.950504	1.01456	0.963515	1.25264	0.720182	0.750553	0.695148	0.510157	0.732832	1.19668	0.7397	1.13345	1.7248	1.69147	0.860369	1.30002
557	1.07403	0.748958	0.498517	0.43893	0.806388	0.556128	0.860514	0.277979	0.897615	0.432297	0.922272	1.02863	0.310442	0.203156	1.28285	0.634079	0.740731	0.325253	0.248756	0.721428	0.296023	2.10003	1.20507	0.445678	0.833585	0.410514	0.630644	0.747489	0.906204	0.694766	0.833258	1.69827	0.782159	0.264583	0.447076	1.06174	0.200425	0.65071	1.73796	1.26604	1.18431	0.276277	0.871098	1.08821	1.08932	0.650771	0.163675	1.33542	1.04928
558	1.08439	1.09976	0.933686	0.870534	0.890283	0.921356	0.985208	1.01673	1.09783	0.850809	0.927441	1.05688	0.994623	0.928709	1.0933	1.00438	0.992942	0.861213	0.810361	0.929525	0.954349	1.20188	1.05706	1.08943	1.05299	1.11488	0.964448	1.10776	1.02855	0.938992	1.09891	1.25231	0.968116	0.931053	0.987799	0.949756	0.882827	0.850114	1.1942	1.18526	1.07919	0.903864	1.0077	1.03768	1.14679	1.37214	1.10091	1.08772	1.08874
560	0.315175	0.417257	0.368645	0.560516	0.842263	0.521048	0.988923	0.302931	0.770436	0.386245	0.674832	0.654633	0.767601	0.466391	0.9155	0.84298	0.381644	0.854993	1.70248	0.746301	0.659034	0.889122	0.779375	0.554509	0.94499	0.583869	0.595585	0.61361	0.845846	1.2907	0.901417	0.80569	0.342351	0.678445	0.628611	0.580968	0.592774	1.07851	1.08922	0.805868	0.730942	0.620411	0.749442	0.615031	0.706121	0.983625	0.941031	1.12643	0.468376
561	0.437617	0.637769	0.527108	0.735794	0.872133	0.699664	1.04815	0.403985	0.762914	0.500749	0.533324	0.848856	0.878465	0.640396	0.875692	0.952797	0.543403	1.01252	1.47657	0.889217	0.732595	0.948261	0.824732	0.640068	0.943855	0.748499	0.773705	0.529319	1.07434	1.32961	0.959316	0.85136	0.517862	0.736229	0.780905	0.661883	0.536205	1.17132	1.11605	0.990534	0.937224	0.628485	0.86406	0.553958	0.838231	0.988677	1.05424	0.633188	0.69331
562	0.906571	1.18559	0.439662	0.323466	0.863239	0.504161	0.81975	0.498531	0.795794	0.786534	1.06594	0.964041	0.541801	0.301195	1.0153	0.486046	0.769945	0.484406	0.406803	0.628041	0.288042	1.59668	1.44933	0.526495	0.694846	1.07828	0.934094	0.747811	0.882003	0.831768	0.739541	1.23005	0.910733	0.312393	0.899306	0.917345	0.211138	0.607623	1.50421	1.09168	0.811209	0.271311	0.731849	0.965317	1.16338	0.732513	0.217326	1.10522	0.971727
563	1.06183	1.02285	0.93409	0.904658	0.942952	0.821779	0.715565	0.903754	0.865971	0.955095	0.846115	1.0305	0.837378	0.914642	0.725871	0.758768	0.941413	0.957524	0.734331	0.917262	0.874608	0.706626	0.709718	0.841033	0.815344	1.07046	0.943564	0.881561	0.895558	1.06367	0.694839	0.703067	0.893084	0.855931	0.986924	0.999617	0.932446	0.681694	0.700612	0.74349	0.713641	0.818957	0.847019	0.861242	0.909034	1.13519	0.848429	0.748596	0.90288
564	0.980658	1.02559	0.869899	0.954457	0.964534	0.893457	0.969547	0.845258	1.03111	1.00242	0.957106	1.07735	0.98244	0.89951	1.00916	1.0182	0.938949	1.03328	0.899583	0.971486	0.944008	0.968967	0.809136	0.889862	1.03155	1.13692	0.968032	1.006	0.978613	1.02025	0.953772	0.921813	0.911684	0.961071	0.981347	1.06822	0.99714	0.966813	0.925234	0.970993	1.00035	1.06258	1.05123	0.916708	0.946273	1.30652	1.24022	1.07277	0.901933
566	1.02242	1.12184	0.869975	0.904028	0.995209	0.975728	1.05555	0.978211	1.12747	0.864159	1.01455	1.10625	1.01479	0.957563	1.20991	1.05299	1.01087	0.913921	0.892587	0.995145	0.9907	1.30439	1.05463	1.10096	1.10323	1.06785	1.04907	1.0959	1.12654	0.947852	1.12067	1.30786	1.02303	0.941371	1.01659	1.03147	0.893878	0.943755	1.24928	1.24798	1.16334	0.946271	1.0398	0.998841	1.14531	1.29803	0.996444	1.26169	1.09934
568	1.30176	1.21582	1.02829	1.16954	1.17569	1.13083	1.15297	1.2114	1.15046	1.1954	1.25177	1.42734	0.966626	1.07443	1.15359	1.1941	1.28189	0.914616	0.929178	1.05914	0.964106	1.11503	1.13519	0.794603	1.1075	0.90671	1.05569	1.08009	1.11833	1.09465	0.984139	1.13404	1.24012	1.01911	1.13312	1.37874	0.973835	0.945978	1.05285	1.13058	1.01998	0.740182	1.24375	1.22713	1.24898	1.17485	0.900181	1.2341	1.14848
569	1.04239	1.0442	0.766168	0.713306	0.65138	0.595251	0.915012	1.27848	1.08128	0.632774	0.709572	0.837241	0.895229	0.771997	1.08346	0.891534	0.833891	0.745047	0.701947	0.805472	0.965107	1.38383	1.37728	1.23086	0.944695	1.20983	0.832445	1.21275	0.875346	0.91033	1.09181	1.12838	0.997918	0.836273	0.963062	0.815924	0.701421	0.895146	1.14224	1.12853	1.19328	0.89498	0.899968	0.910561	1.02004	1.53689	1.56105	1.49307	1.12362
570	0.719195	0.678248	0.817332	2.19496	2.18088	0.675268	0.927426	0.622728	1.07879	0.506192	0.723295	0.792383	1.01912	0.671552	1.11736	0.755244	0.673435	0.964886	1.03533	1.06189	1.7905	0.712504	0.762467	0.670014	1.10402	0.751294	0.593942	0.92206	1.01378	0.886753	0.54806	0.665005	1.08153	0.840165	0.53411	0.5601	1.02075	1.93107	1.80154	0.761181	0.616378	0.881961	1.11633	0.768778	0.659726	1.51448	0.877193	0.68075	0.685693
571	0.981249	0.88974	0.92267	0.880718	1.006	0.965451	1.08577	0.677125	0.783783	0.88851	0.87976	1.17389	0.595553	0.891453	0.672027	0.864504	0.94586	1.13633	0.854912	0.96744	0.692996	0.782108	0.792579	0.693867	0.928453	0.819336	1.11095	0.738355	1.04424	0.922511	0.725512	0.606836	0.868759	0.990677	0.942621	1.22044	0.869719	0.890085	0.771423	0.872586	0.717663	0.755281	0.857383	0.850453	1.21678	0.720405	0.874143	0.686865	0.900151
572	0.857596	0.593948	2.35003	2.15585	2.09791	2.72522	1.86367	0.732919	0.912384	0.497471	0.702576	0.670745	1.45267	1.82169	1.20249	0.556797	0.843997	0.743431	3.42165	3.48048	3.23211	1.19428	0.99043	0.738557	0.961791	0.684422	0.590429	0.855026	0.710358	1.33738	0.69126	0.489702	0.837779	0.8075	0.54208	0.647063	1.4052	3.95278	3.06268	0.914265	1.76875	0.896676	1.09408	0.732699	0.578462	2.36495	0.905997	0.600447	1.0273
574	0.975021	1.22213	0.891855	0.983266	1.1243	1.06783	1.14166	0.903307	1.18547	0.966843	1.12219	1.24606	1.05756	0.964214	1.3202	1.10088	1.00995	1.03346	1.07844	1.08645	1.03727	1.33148	1.05881	1.11744	1.21287	1.0329	1.15063	1.0947	1.23569	1.07021	1.11335	1.30131	1.02935	0.977047	1.1079	1.15595	0.932989	1.06905	1.27574	1.29976	1.17463	0.951121	1.1026	1.02473	1.24769	1.22195	0.905088	1.33914	1.14754
576	0.769441	0.97635	0.747413	0.986278	0.957567	0.894261	1.22091	0.767748	0.915201	0.761403	0.848998	0.82414	0.668009	0.819463	0.850619	0.637004	0.699485	1.02196	1.9345	1.48822	0.922532	0.606642	0.764136	0.762991	0.969752	0.88354	0.714439	0.949378	0.994192	0.847643	0.605572	0.590944	0.889237	0.889888	0.660774	0.936867	0.939478	2.04258	1.77246	0.556986	0.621597	0.91667	0.873237	0.838255	0.826119	0.840189	1.05657	0.706788	0.906603
577	0.77002	0.735656	0.996799	0.505645	0.556948	0.510228	1.61944	0.735021	1.24262	0.603082	0.744194	0.69158	0.662606	0.713336	0.530804	0.638705	0.629849	1.36237	1.69537	1.52594	0.775183	0.468157	0.966069	0.64559	1.20847	0.851239	0.626337	0.923394	0.831082	0.650179	0.592518	0.575161	1.16326	0.791476	0.572772	0.651566	1.0709	0.896881	0.782121	0.555541	0.487521	0.86484	1.03952	0.723017	0.563488	0.76499	0.893078	0.532176	1.03175
578	1.00479	1.05209	0.96601	1.02708	1.08766	0.96751	1.04314	0.822439	1.02317	1.08109	1.01662	1.22264	1.0657	0.897121	1.06952	0.996914	0.982142	1.06988	0.997988	0.978477	1.00433	0.946137	0.818339	0.859739	1.06047	1.13104	1.10949	0.9617	1.05544	0.889352	0.895364	0.92263	0.978839	0.985545	1.00699	1.15364	1.01114	1.05237	0.945034	0.972018	0.966624	1.10052	1.06517	0.912405	0.989375	1.22274	1.12739	1.07231	0.939986
579	0.706635	0.805208	0.654179	0.849055	1.04952	0.857651	0.928811	0.680639	1.08709	0.839792	0.836321	1.11854	1.2014	0.893474	0.964786	0.802519	0.762013	0.965717	1.0013	0.934949	0.972117	0.806298	0.636707	0.828139	0.989423	1.0514	0.864013	0.963557	0.922363	1.08778	0.779531	0.762064	0.692408	0.879355	0.850573	0.813811	0.744733	0.913799	0.762266	0.746482	0.744584	0.816857	0.896801	0.799141	0.936585	1.35495	1.12944	0.794021	0.747525
580	0.689765	0.686609	0.866944	0.961755	0.993412	0.497244	1.12893	0.684131	1.15491	0.530007	0.670596	0.732898	0.645858	0.568254	0.786195	0.599081	0.632562	1.12755	0.98379	0.950345	0.936242	0.383018	0.7297	0.667518	1.08543	0.775539	0.576127	0.869844	0.645656	0.517997	0.599545	0.571287	1.08053	0.755905	0.511175	0.61853	1.0011	0.760366	0.71367	0.460667	0.428206	0.800295	1.04436	0.645956	0.581229	1.94243	0.912654	0.553113	0.925214
581	1.23162	1.25417	1.05546	1.16627	1.32545	1.27873	1.14546	1.05872	1.13999	1.19351	1.38727	1.50555	1.03732	1.02678	1.18514	1.27356	1.30669	0.930679	0.991289	1.13383	0.975331	1.20415	1.19351	0.783895	1.18191	0.856962	1.17446	1.04256	1.175	1.13706	0.996214	1.19234	1.24528	1.01045	1.11771	1.43509	1.05107	0.995464	1.10504	1.17285	1.04111	0.76487	1.32088	1.26092	1.2815	1.07072	0.711956	1.31143	1.19522
583	1.20789	1.15034	0.934805	1.39056	1.19569	1.17591	1.47103	0.776821	1.02736	1.41731	1.11024	1.45534	1.09097	1.21118	1.30668	1.13707	1.05561	1.26461	1.5462	1.17757	1.28698	1.3084	0.751321	0.831337	1.1448	1.01382	1.07332	1.03154	1.46812	1.33536	1.08874	1.20622	0.976715	1.09996	1.17739	1.27041	0.991372	1.06283	0.899226	1.26107	1.0518	0.95751	1.3418	1.00484	1.14758	1.21938	1.01054	1.49771	1.11637
585	0.847486	1.2994	0.910503	1.00973	1.27991	1.14908	1.31356	0.747211	1.25331	1.04527	1.27382	1.38623	1.2033	0.915451	1.5323	1.17263	1.02839	1.14395	1.2841	1.16341	1.09253	1.48563	1.08161	1.0463	1.364	0.972021	1.32526	1.04014	1.34658	1.17912	1.16437	1.36859	0.961106	0.960491	1.15308	1.27701	0.995689	1.23167	1.36467	1.40821	1.24888	0.921467	1.16556	1.02991	1.41593	1.13745	0.720719	1.50444	1.16938
586	1.04296	1.03071	0.890121	1.21635	1.09348	0.983499	1.47532	0.869173	0.906832	1.32359	0.957402	1.34064	0.898285	1.19627	1.35241	1.18609	0.929116	1.51321	1.65842	1.11054	1.03489	1.34529	0.613892	0.912159	1.0531	0.988566	1.0001	1.00195	1.27384	1.35114	1.10416	1.07892	0.795468	1.18818	1.08135	1.27609	0.928677	1.05825	0.869458	1.36811	1.06653	0.938725	1.22472	0.878841	0.952826	0.899328	0.972051	1.50558	1.18067
587	1.26247	1.2477	1.10499	1.22537	1.25645	0.902106	0.905229	1.39149	1.10574	0.965658	1.00213	1.25866	1.6972	0.970353	1.01633	1.04862	1.20493	1.098	1.09181	1.02394	1.33744	1.22622	1.19696	1.19087	1.0736	1.40334	1.12242	1.28714	1.15732	0.895646	0.977329	1.34668	1.19522	1.23295	1.09709	1.05891	1.1828	0.95807	1.06894	1.0546	1.13562	1.2503	1.05184	1.14675	1.25979	1.51249	1.19171	1.17782	1.13987
588	1.18067	1.34001	1.19828	1.2955	1.62875	1.63065	1.2175	0.952328	1.19857	1.4146	1.60006	1.76219	1.24089	1.07433	1.28241	1.41113	1.39753	1.03981	1.09307	1.19382	1.07064	1.25265	1.21744	0.760347	1.23881	0.890978	1.37547	0.932162	1.22533	1.19813	1.03691	1.21903	1.29702	1.06376	1.21285	1.63438	1.20056	1.0589	1.12088	1.22784	1.08314	0.82403	1.35334	1.30642	1.37569	0.950098	0.528914	1.28057	1.19765
590	0.936387	0.996975	1.00103	1.11265	1.03216	0.677025	0.855991	1.14812	1.37287	0.710064	0.979839	0.79503	0.632317	0.803675	1.10733	0.664915	1.13927	1.00382	1.06972	1.33059	1.13466	0.714409	0.549093	1.33097	1.08848	1.04057	0.726967	1.03176	1.44113	0.933135	0.635655	0.555178	0.945771	1.13995	0.648551	1.13278	1.24065	0.713184	0.765655	0.781216	0.764918	1.52221	1.03613	0.864568	1.28794	0.708989	0.96182	1.0613	0.802617
592	0.700157	0.835191	0.968065	0.566498	0.583104	0.548075	0.896555	0.726279	1.50007	0.564586	0.73892	0.681681	0.624127	0.68264	0.495397	0.608463	0.643071	1.13964	1.34185	1.17221	0.977797	0.353099	1.04033	0.712188	1.01454	0.990825	0.617453	0.933301	0.704448	0.872567	0.541779	0.582825	1.20063	0.770195	0.573644	0.747623	1.47546	1.2404	0.875238	0.59448	0.392142	0.889042	0.95916	0.79733	0.655042	0.697552	0.832879	0.500165	1.18631
593	0.945163	1.15977	0.98237	1.01082	1.15862	1.03886	0.95724	0.867843	1.04365	1.0788	1.07551	1.3052	1.14405	0.938845	1.09272	1.04125	1.06896	1.00716	1.12952	1.06228	1.01571	1.1023	0.905979	1.00264	1.0551	1.16468	1.24036	1.02288	1.15424	0.822594	1.11631	1.21681	0.841648	0.975608	1.13503	1.19489	1.02103	1.10569	1.02327	1.05334	1.04096	1.16232	1.0489	1.06452	1.14659	1.0854	0.882665	1.21352	1.00632
594	0.657504	0.646603	1.10557	0.641005	0.657904	0.53641	0.921655	0.736268	0.90796	0.555676	0.853218	0.570936	0.570751	0.705462	0.542987	0.828582	0.688343	1.09825	1.62964	1.31314	1.03817	0.324838	1.0581	0.888697	0.947418	0.846995	0.62037	0.974823	0.694201	0.885302	0.565699	0.80588	1.07737	0.822982	0.61495	0.786602	1.84873	2.08455	1.52021	0.556144	0.407815	1.01943	1.00469	0.863459	0.635392	0.80375	0.869554	0.554203	1.28783
595	1.22498	1.44356	1.14019	1.48679	1.66115	1.09387	1.2084	1.00599	1.37764	1.41967	1.26211	1.6523	2.01359	1.02276	1.32135	1.1272	1.06515	1.34197	1.23193	1.21147	1.68789	1.0417	0.796227	0.9557	1.30574	1.60207	1.37397	1.2731	1.48544	1.34715	0.871013	0.928275	1.19528	1.13889	1.26735	1.33016	1.06099	0.829815	0.690815	0.966729	1.17543	1.15887	1.19733	1.06936	1.36168	1.62561	1.08658	1.15254	0.951963
597	0.897561	0.713872	2.0097	0.717492	0.757005	0.559174	0.752768	0.694535	1.02602	0.562963	0.753741	0.593843	0.505849	0.681565	0.580784	0.61286	0.892132	1.23246	1.48727	1.10942	1.23182	0.337533	0.724383	0.916886	0.933522	0.912091	0.656714	0.949642	0.79791	0.788968	0.529057	0.531645	1.30969	0.957129	0.614689	0.749159	1.66935	1.35814	1.07654	0.503521	0.418042	1.43248	0.89208	0.942276	0.57349	0.684231	0.879635	0.629521	1.45429
598	1.43587	2.21932	1.35813	1.88937	2.00771	1.50076	1.37275	1.34824	1.90096	1.67479	1.87355	2.25064	2.95263	1.54301	2.44338	1.0823	1.60494	2.0461	2.14552	1.65556	2.28856	2.25857	0.883229	1.42848	2.23581	1.5889	2.17035	1.61731	2.30445	2.17347	1.20236	1.40335	1.28374	1.45385	2.0478	2.2799	1.46026	1.44839	1.50676	1.84139	1.83446	1.45175	1.82326	1.35864	1.91955	1.72878	1.03721	2.06822	1.33066
599	1.06189	1.37107	1.29405	1.25875	1.8109	1.81121	1.28104	0.827325	1.21022	1.65396	1.84224	2.08823	1.31755	1.04939	1.44097	1.42542	1.46054	1.13678	1.13073	1.1951	1.14286	1.31505	1.16944	0.745535	1.28527	0.862317	1.55473	0.828901	1.14624	1.13685	1.06617	1.21045	1.29483	1.07302	1.18512	1.76311	1.40797	1.19779	1.12375	1.28435	1.15749	0.847973	1.31805	1.27037	1.34383	0.834061	0.448306	1.31288	1.19803
600	0.891507	0.850502	0.833327	0.867727	0.801568	1.01784	0.642479	1.47057	0.940682	0.908974	0.786178	1.14971	0.969388	0.8962	0.777979	0.957031	1.04634	1.12735	0.862976	0.922822	0.714238	0.499991	0.897639	1.10356	0.893062	1.09672	0.954934	1.0044	0.895324	0.9749	1.00051	1.04298	0.907754	1.10839	0.783563	0.978242	0.814619	0.377487	0.339306	0.777471	0.635452	1.12667	1.0005	0.831986	0.773072	1.00395	0.98458	0.88623	1.0037
601	0.890504	1.04728	0.827886	1.23952	1.12343	0.983466	0.813771	1.34982	0.96587	1.05207	0.789049	1.10479	1.22052	0.955303	1.04496	1.07898	0.89092	0.889129	1.01397	1.01179	0.955794	0.776574	0.7073	1.09348	0.877043	1.2699	1.10297	1.12516	1.14756	1.09939	1.11369	1.06647	0.879902	0.956387	0.958431	0.980335	0.826573	0.511498	0.483099	0.963702	0.679962	1.18517	1.00431	0.927221	1.12542	1.32341	1.4217	1.04399	0.944082
602	1.20136	1.24246	0.736189	1.02317	1.15221	1.06435	1.56451	0.795379	1.04008	1.01085	0.824061	0.852677	0.971858	0.777401	1.97771	1.11458	0.592975	0.855834	1.46906	1.15173	1.11601	1.69792	0.770514	0.717668	1.23969	1.18395	1.16688	1.11718	1.37401	0.978351	0.927699	1.18097	0.937316	0.937471	1.19532	1.07188	0.915895	1.74011	0.918191	1.365	1.32955	0.855906	1.15529	0.959852	1.18973	1.54878	0.917648	1.78466	0.94699
603	0.858755	0.600494	1.06908	0.55873	0.547204	4.30691	1.60633	0.641378	1.1742	0.840478	0.831227	0.690512	1.26529	1.69319	1.05883	1.14132	0.765493	1.11577	2.06212	1.61497	2.05943	0.540231	2.98103	0.878538	1.20884	0.700028	0.595373	0.849701	0.589306	1.43494	0.411781	1.21978	0.966891	1.15808	0.549862	0.635279	1.3031	1.87979	1.47661	0.922157	1.53916	0.818039	1.17755	0.984932	1.63948	1.63426	1.00238	1.43026	0.768389
604	0.826069	1.36929	0.90715	1.05828	1.30044	1.12228	1.2982	0.783046	1.27682	0.945165	1.19527	1.39191	1.40407	0.975478	1.47028	1.21792	0.943143	1.15628	1.50339	1.30517	1.29525	1.19785	0.87398	0.98351	1.36536	0.975242	1.29536	1.17062	1.34948	1.24039	1.22486	1.25485	0.920899	0.998013	1.1221	1.22919	1.03783	1.31485	1.08496	1.23741	0.969037	0.893618	1.23445	1.02784	1.35257	1.43142	0.887873	1.52224	1.13003
606	0.830125	0.934453	0.847974	0.850069	0.922302	0.849237	1.00232	0.64311	0.766746	0.880008	0.874217	0.973518	0.559544	0.652666	0.794513	0.795715	0.816994	1.13446	0.930952	0.884546	0.78445	0.766861	0.702909	0.572156	0.864343	0.692397	0.982007	0.67061	0.90783	0.886192	0.650646	0.642745	0.802402	0.774054	0.890672	1.11075	0.767214	0.949553	0.738243	0.825864	0.707128	0.63063	0.784075	0.804324	0.870383	0.74358	0.640556	0.733466	0.746958
607	0.802189	0.620407	2.34618	1.45451	1.34482	2.87388	0.895531	0.630407	0.993007	1.36345	1.01068	1.03583	1.59855	2.71574	1.27524	2.47291	0.717681	1.06449	1.50604	0.740319	1.64025	1.21125	2.44432	0.868973	1.41147	0.695468	0.646067	0.901399	0.86393	1.07815	0.543726	2.09589	1.20164	1.51588	0.59422	0.679865	1.34036	1.4468	0.88186	0.672249	1.14198	0.841211	1.74013	1.20969	1.86559	1.6046	5.36856	2.11455	0.969484
609	0.971058	1.28112	1.13097	1.10086	1.45075	1.37413	1.0704	0.766319	1.00478	1.21976	1.30822	1.67732	1.57748	0.957008	1.34924	1.36249	1.15628	1.07801	1.23979	1.12037	1.2925	1.18236	0.979102	0.93082	1.11322	1.09295	1.51924	0.872294	1.17855	0.858945	0.9591	1.26115	0.984346	0.994561	1.14409	1.25725	1.3002	1.18507	1.05521	1.10559	1.02777	1.27128	1.01728	1.08563	1.19497	0.879633	0.58424	1.03734	1.0344
612	1.68373	1.92823	1.15331	1.63882	1.65679	1.65769	1.32217	1.36751	1.60886	1.56089	1.43441	2.02745	1.9996	1.59222	1.19227	1.12441	1.41358	2.34613	2.29173	1.63565	2.36657	1.10907	0.967816	1.23574	1.71905	1.56688	2.23335	1.56515	1.96683	1.99048	1.11597	1.11363	1.57155	1.76737	1.90405	2.00901	1.4834	1.3033	1.07876	1.17547	1.02912	1.30778	1.49339	1.25491	1.59475	1.77109	1.39513	1.82959	1.22157
613	0.835972	0.717784	0.732713	1.10328	0.876398	1.01527	0.969767	0.785338	0.745191	0.88719	0.695361	0.912655	0.579071	0.877182	0.956468	1.05182	0.656884	0.994483	0.951146	0.870092	0.849559	0.728149	0.660074	0.540401	0.858307	0.749755	0.679704	0.85965	1.18004	0.894897	0.945697	0.766247	0.653018	0.8049	0.87928	0.866675	0.671035	0.857558	0.730454	0.765119	0.916358	0.708973	0.845805	0.698153	0.774316	0.840598	0.996235	0.588814	0.796991
615	2.01941	1.58685	1.00354	1.20685	1.09736	1.41336	1.55879	1.434	1.51725	1.61687	1.24077	1.70011	1.76043	1.66088	1.21072	1.0228	1.33558	1.96063	1.87793	1.31269	2.45761	1.15821	0.980769	1.18137	1.69083	2.1635	2.14561	1.43213	1.48246	1.75155	1.11956	1.00885	1.46989	1.66406	2.95221	2.75835	1.31388	1.32554	0.902796	0.969901	0.851376	1.46923	1.63238	1.21242	1.11704	1.66989	1.40204	1.23694	1.2617
616	0.468491	0.394195	8.62939	1.63344	1.42039	1.08208	1.44542	0.313457	0.626967	0.681482	0.441923	0.707343	0.753923	0.712417	1.17936	0.651769	0.478207	3.23021	5.56836	2.46155	3.29352	1.03809	1.14431	0.423435	0.892767	0.391889	0.521081	0.72454	1.0165	0.99271	1.24485	0.600839	5.24015	0.549043	0.56711	0.50629	3.56305	0.665709	0.548331	0.751287	1.10569	0.444855	0.875295	0.407031	1.03065	0.752629	1.12255	1.14976	6.04092
617	2.03795	2.19543	1.34399	1.64678	1.76182	2.09448	1.43676	1.66468	1.84488	1.70359	1.58023	2.52761	2.58409	2.13168	1.305	0.916277	1.77481	2.77975	2.6207	1.80225	2.99879	1.36515	0.903567	1.31253	2.03126	1.81751	2.44126	1.75867	2.05239	2.31995	1.16156	0.81471	1.93112	2.17986	2.09132	2.20904	1.6617	1.43005	1.11871	1.21589	1.21681	1.5298	1.76852	1.41017	1.64498	2.36321	1.739	1.8985	1.42598
618	0.907174	0.762132	0.843954	0.673331	0.687203	0.683873	0.735284	0.706073	0.692467	0.675	0.73934	0.725982	0.465235	0.653767	0.570694	0.676914	0.808995	0.758285	0.570316	0.694961	0.576347	0.642928	0.712611	0.665257	0.701481	0.707116	0.755952	0.687387	0.713361	0.671145	0.61397	0.618372	0.795744	0.737015	0.806153	0.883923	0.750035	0.670621	0.604672	0.720596	0.62004	0.652283	0.72221	0.742144	0.679868	0.738375	0.644001	0.600185	0.771403
619	0.91368	0.914098	0.870091	0.864358	0.934879	0.852117	0.989524	0.810933	1.05214	0.831453	0.913427	0.868928	0.647669	0.759331	0.905681	0.82959	0.728662	1.23056	1.0972	0.835546	0.985855	0.80948	0.666687	0.713379	1.04979	0.736809	0.826813	0.874406	0.96055	1.12727	0.778946	0.766734	0.922682	0.777555	1.00826	1.00876	0.845034	0.768804	0.707536	0.851209	0.81389	0.742446	0.869127	0.923399	0.932949	0.983653	0.937329	0.756183	0.781824
620	0.908992	1.06777	1.14003	0.817643	1.05364	1.39583	0.481806	0.97629	1.12983	0.535236	1.24945	1.19273	1.10637	1.06543	0.940248	3.23237	1.12362	0.907743	1.05353	1.13499	0.874125	1.64173	1.47552	1.41645	1.33109	0.91648	1.06041	1.14371	1.01909	0.675961	0.953315	4.52504	0.923449	1.14377	0.915341	1.26915	1.33164	1.86214	1.11903	1.26135	0.565221	1.26947	1.15561	1.23757	1.23898	0.993896	0.770572	0.253986	1.15692
621	1.12221	1.44275	1.37704	1.33832	2.01968	2.09308	1.47445	0.865591	1.28687	1.77248	2.01658	2.49458	2.05783	1.11544	1.3789	1.41519	1.69435	1.29802	1.35378	1.31466	1.53315	1.29417	0.91595	0.756216	1.46255	0.989177	1.80791	0.951998	1.22461	1.16082	1.16347	1.19002	1.35477	1.13353	1.27055	1.87219	1.65238	1.37858	0.946015	1.1509	1.2797	0.949721	1.34875	1.33394	1.45921	0.994584	0.538454	1.27338	1.20455
622	0.72797	0.734373	0.700932	0.70506	0.738178	0.699859	0.654538	0.589418	0.674729	0.632119	0.696872	0.627488	0.398057	0.599427	0.532436	0.553703	0.635927	0.745433	0.651726	0.655118	0.50543	0.574416	0.575092	0.566454	0.639952	0.624806	0.624934	0.696613	0.697457	0.6707	0.537813	0.488899	0.74507	0.508268	0.653671	0.732463	0.581604	0.556708	0.511834	0.576647	0.581642	0.532544	0.618807	0.698996	0.740499	0.602353	0.577175	0.496439	0.548158
623	1.17565	1.12825	0.745473	0.911696	1.04985	1.00545	0.991637	0.883457	1.01126	0.919805	1.06526	1.22754	0.660704	0.749944	1.34037	0.779351	1.06663	0.770809	0.74528	0.923212	0.824099	1.97006	1.98773	0.886797	0.963128	0.81882	0.821514	0.916862	1.15076	0.890385	1.00314	2.23429	1.12661	0.945808	0.728361	1.11877	0.832262	0.774785	1.81137	1.47138	1.00433	0.768507	1.09917	1.05881	1.17354	1.01196	0.597541	1.72404	1.0995
625	1.12282	0.869549	0.822357	0.57868	0.596429	0.981149	0.754638	1.08075	0.778593	0.795611	0.848257	0.881541	1.1301	1.04413	0.769371	0.814319	0.949557	0.923808	0.788684	0.580277	0.913315	1.05623	0.59925	1.12647	0.841194	0.943314	0.785739	0.964223	0.841432	1.14377	0.840169	0.925533	1.32844	0.987943	0.707668	0.622819	0.90466	0.988458	0.846578	1.03424	0.965642	1.20242	0.613565	0.901339	0.794141	0.786276	0.887161	0.943458	0.827083
626	1.02673	0.712585	0.866452	0.589605	0.63632	0.670599	0.730462	0.97757	0.830269	0.627364	0.695748	0.616074	0.483719	0.732465	0.744967	0.7357	0.722372	0.767958	0.669394	0.670383	0.696709	0.758119	0.764915	0.80469	0.791428	0.772383	0.580289	0.861131	0.716576	0.814422	0.745063	0.720205	0.926019	0.737422	0.794936	0.711241	0.840284	0.581567	0.541814	0.777721	0.845977	0.760044	0.737533	0.747891	0.654769	0.961895	1.08348	0.491909	0.850213
627	0.946617	0.758415	0.851399	0.675926	0.668733	0.677613	0.79301	0.817716	0.738414	0.674247	0.747631	0.686385	0.478486	0.665322	0.642963	0.747668	0.798275	0.808469	0.563815	0.680648	0.625312	0.742876	0.705316	0.734406	0.722226	0.747082	0.702723	0.747086	0.728978	0.679558	0.740224	0.724618	0.835192	0.725689	0.778879	0.831524	0.828952	0.789414	0.661464	0.787082	0.688343	0.684536	0.728716	0.783528	0.676624	0.829155	0.771372	0.70189	0.837531
630	1.50193	1.1411	0.922367	0.907566	0.926702	1.21121	1.43374	1.07621	1.16644	1.29404	1.04384	1.17652	1.18796	1.06223	1.12394	0.90391	1.04273	1.22031	1.04013	1.04133	1.51649	1.10621	1.05104	1.04226	1.33115	1.55298	1.55689	1.20917	1.12226	1.11484	1.0091	0.813644	1.19918	1.11656	1.81715	1.83884	1.04531	0.914137	0.970792	0.962554	0.920075	1.19829	1.26195	1.05866	0.992342	1.37691	1.08671	1.52345	1.06878
631	1.87837	1.91799	1.35963	2.04498	2.18055	1.85586	1.35614	1.61254	1.61781	1.8937	1.5985	2.50727	2.28929	1.79058	1.1456	1.04602	1.47895	2.57206	2.54809	1.84982	2.26595	0.90893	0.956359	1.32524	1.77347	1.62155	2.35889	1.54817	2.33248	2.34971	1.1822	0.973212	1.88381	2.21838	1.8158	2.28076	1.71968	1.23084	0.964543	1.0566	0.905443	1.51184	1.6775	1.44115	1.97091	1.94374	1.65711	0.823982	1.12629
632	1.00503	0.659037	0.848566	0.539886	0.563055	0.6227	0.58825	0.962049	0.603699	0.604455	0.657386	0.540685	0.392124	0.661851	0.600566	0.729099	0.794839	0.671461	0.399157	0.579315	0.464251	0.64395	0.754359	0.814594	0.576212	0.676236	0.562522	0.6943	0.626231	0.525408	0.645125	0.65797	0.887958	0.691307	0.647649	0.682862	0.822941	0.605747	0.62591	0.677532	0.693348	0.691211	0.656335	0.686992	0.560428	0.695639	0.64932	0.545821	0.855538
633	1.22855	1.06562	0.682567	0.851888	1.06532	1.0033	0.959025	0.734484	0.962448	0.913284	1.05061	1.22377	0.635427	0.619458	1.42312	0.749197	0.998786	0.694758	0.637464	0.910999	0.707227	2.13501	1.78481	0.741671	0.923105	0.7297	0.801717	0.830569	1.17134	0.931603	0.945828	2.30112	1.1467	0.860359	0.650657	1.134	0.796457	0.616253	2.01833	1.52947	1.04357	0.602333	1.12815	1.07519	1.26432	1.00381	0.479924	1.80438	1.11243
635	1.01258	0.846911	1.15679	0.620406	0.904626	1.21812	0.971669	1.30895	0.82925	0.956146	0.833733	0.883728	1.02757	0.955396	0.660972	0.755771	1.38076	1.30981	0.730859	0.835693	1.26548	0.509508	1.26601	1.15347	0.944187	0.827927	0.854845	1.06886	0.868181	0.851766	0.640903	0.865235	1.44266	1.14649	0.708231	0.485758	1.02629	0.560015	0.49596	0.815762	0.556494	1.16938	0.993331	0.883471	0.621279	0.903111	1.01451	0.536766	1.15177
636	1.18567	0.959326	1.06339	0.734786	0.844945	1.27409	1.0559	1.13771	1.07969	1.25554	0.908637	0.934728	0.873091	0.931411	1.04053	0.825425	1.18669	1.09811	0.69807	0.81325	1.22584	1.10126	1.23742	1.0202	1.00857	1.23571	1.23476	0.977958	0.895862	0.854149	0.897795	1.03771	1.18036	1.00707	1.2499	1.12177	0.938208	0.870146	1.01659	1.02092	0.925448	1.01086	1.10323	0.857554	0.842033	0.994974	0.846689	1.11559	1.06088
638	1.38404	1.29529	1.03733	1.08341	1.17952	0.985909	1.10533	1.1556	1.14324	0.977412	1.37407	1.37787	1.0882	0.933121	1.05059	1.03316	1.32579	0.928261	0.840479	1.1414	0.993591	1.16144	1.09723	1.02771	1.40407	0.88569	1.25585	1.34217	1.26963	0.952408	1.01304	1.17693	1.17138	0.958734	0.992476	1.25778	1.02089	0.917325	1.07443	1.20639	0.994955	0.84808	1.40706	1.33213	1.31139	1.34308	0.966468	1.25817	1.32315
639	1.94937	1.93236	1.27351	2.2294	2.13242	1.60507	1.33323	1.77118	1.74976	2.08582	1.44971	2.4605	2.25084	1.48074	1.14319	1.11808	1.51034	2.30098	2.18082	1.42739	1.79316	1.15021	0.762007	1.57543	1.88327	1.56713	2.93005	1.28172	2.02792	1.64883	1.13269	1.064	1.80484	1.81845	2.06707	1.91619	1.47507	1.24502	1.12441	0.969303	1.2741	1.44244	1.61729	1.26281	1.81346	1.8407	1.57922	1.28948	1.07253
641	1.38224	1.00196	0.983426	0.814499	0.848263	1.27259	0.942774	1.22625	1.12109	1.22609	0.901687	1.16865	1.29775	1.17653	0.993063	0.948623	1.13535	1.25623	0.826967	0.98658	1.61504	1.04458	1.18803	1.01615	0.996686	1.24614	1.25393	1.0544	0.984655	1.06761	0.996444	1.02823	1.19492	1.16343	1.74542	1.30059	0.952484	0.926947	1.14771	1.23349	0.925028	1.09081	1.06268	0.891876	1.04495	1.44537	1.27943	1.04051	1.00798
643	0.945389	0.864422	1.03102	0.740523	0.632743	1.68993	7.5279	0.683622	2.56112	0.943429	0.723717	0.906175	0.749673	1.4472	0.94763	0.762934	0.976182	6.10001	3.33869	3.0623	2.54423	0.608013	2.09797	0.517874	4.40727	0.655399	0.899486	0.707084	0.865856	1.42063	0.508251	0.708132	7.52679	0.743888	0.814837	1.19419	4.30888	0.932209	0.8111	0.968693	0.65742	0.917056	2.14029	0.637588	0.799153	1.91749	0.883738	0.904773	1.66817
644	0.852264	1.19518	1.00713	2.37979	2.1787	0.7184	1.51465	0.857022	1.8433	1.12422	0.940202	1.07999	1.03715	1.10088	1.51835	1.75459	0.928373	2.59529	2.51743	2.20485	1.50127	1.1737	0.875502	0.958688	1.15017	0.727064	1.12808	0.677942	4.8295	0.984562	0.940837	1.37548	2.7085	0.958743	1.60525	1.24907	1.1559	2.00389	0.554306	1.02443	1.12321	1.18106	2.15831	0.883704	1.23969	1.95693	1.30152	0.820206	0.879593
645	1.32682	1.21616	1.04695	1.2589	1.24788	1.37509	0.987729	1.32484	1.23594	1.02723	1.02467	1.07147	1.02051	1.13067	0.889743	1.04057	0.978626	1.36637	1.41154	1.07014	0.955421	1.01613	0.965512	1.17937	1.11863	1.17748	1.03598	1.07423	1.38534	1.73991	1.06422	1.01617	1.35276	1.12828	1.44473	1.12438	1.18358	0.969425	0.984988	0.939818	1.07925	1.20705	0.978235	0.949018	1.20599	1.28883	1.42993	0.939846	0.797579
646	1.39458	1.20306	0.987421	1.03155	0.93338	0.836409	1.04086	1.24959	1.00966	0.996669	1.06726	1.23725	0.905439	0.936973	0.986327	1.0402	1.22598	0.882454	0.687021	1.0014	0.888044	1.06072	1.05488	0.961877	1.10327	0.948763	1.01038	1.13436	1.06246	0.866495	1.00755	1.0864	1.08309	0.930164	0.936783	1.16256	0.956711	0.855998	0.988578	1.1382	0.912876	0.793046	1.25197	1.15524	1.19655	1.38111	1.10456	1.11995	1.26076
648	1.11171	1.20784	1.08422	1.03648	1.02888	0.864934	0.99304	0.949947	1.06137	1.02738	1.10081	1.17872	1.18623	0.933178	1.02644	1.05019	1.1852	0.823221	0.725165	1.04612	0.999057	1.03681	0.948735	1.09044	1.05823	1.07693	1.32344	0.959902	1.02589	0.730732	0.970665	1.15152	0.948973	0.982715	1.07313	1.119	1.09103	0.936331	0.984374	1.05904	0.945337	0.911583	1.01949	0.922592	1.19992	1.01335	0.77245	0.970493	1.22103
649	0.832894	0.698476	0.63782	0.93111	0.817305	0.70624	1.2047	0.570584	0.527408	0.670192	0.68146	0.595883	0.717077	1.19998	0.602061	0.561923	0.660141	0.705543	0.541185	0.839078	0.586561	0.610964	0.419195	0.523551	0.597761	0.683184	0.621137	0.5545	0.893711	0.56372	0.51829	0.420038	0.667903	0.511872	0.587099	0.878327	0.478404	0.650878	0.56505	0.564872	0.667706	0.650905	0.599435	0.59353	0.836593	0.97831	0.581149	0.542656	0.547625
652	1.4218	1.08668	0.887745	0.973424	0.786777	0.745256	0.946017	1.33165	0.925748	0.96278	0.838824	1.00517	0.798323	0.879001	0.877737	0.935522	1.12272	0.829446	0.590503	0.883586	0.801183	1.01925	1.02375	0.930933	0.934235	1.01443	0.83077	0.97476	0.932629	0.796888	0.97473	1.0446	0.986307	0.864377	0.837074	0.990199	0.804874	0.765144	0.933679	1.09024	0.862349	0.729298	1.07869	0.957356	1.07102	1.40294	1.31334	1.04129	1.23423
653	1.23462	1.20702	1.91962	4.78857	4.95337	6.44075	1.91009	1.44338	1.67179	1.25506	0.778649	0.958832	2.4915	4.29515	2.29364	0.883555	1.23196	2.14871	3.68389	3.81577	3.76796	1.75591	2.23039	0.965986	2.83435	1.0641	1.06843	0.614129	1.50283	2.19823	1.82721	1.02862	6.06591	3.52839	0.976383	0.875672	2.73601	2.86539	2.31451	1.45894	1.91633	1.1378	4.72371	0.954964	0.963538	2.54788	1.17118	1.38916	1.24396
654	1.20834	1.02596	0.587167	0.731067	1.08512	0.942474	0.895268	0.59767	0.906712	0.814064	1.0944	1.29576	0.523663	0.440094	1.49883	0.730084	0.933086	0.649584	0.52354	0.902354	0.632068	2.48541	1.78476	0.60178	0.862008	0.590013	0.784777	0.740786	1.16133	0.922089	0.898336	2.27413	1.09321	0.723246	0.57692	1.12291	0.726752	0.530401	2.12031	1.60778	1.0252	0.413883	1.16625	1.10661	1.36986	0.923055	0.347939	2.03519	1.17038
655	1.14471	1.2843	0.764944	1.04843	1.01652	0.999212	1.05342	1.18963	1.01739	1.00386	1.04496	1.4211	0.985405	0.92354	1.21221	0.803348	1.14253	0.715997	0.697384	0.922316	0.835964	1.67614	1.97594	0.943233	1.00243	0.991687	0.819832	0.988434	1.11411	0.753584	0.892137	2.47278	1.14601	1.04564	0.948829	1.16975	0.876901	0.754362	1.65952	1.43744	0.928993	0.810011	1.09281	1.07873	1.15269	1.09016	0.769075	2.02679	1.00153
656	1.11297	1.26359	1.1434	1.05222	1.14183	1.07389	1.16053	0.904131	1.0913	1.10225	1.21371	1.31313	1.45421	0.989236	1.16353	1.23358	1.25053	0.902882	0.854441	1.13641	1.09364	1.21299	1.06406	1.1156	1.11872	0.984137	1.47174	0.922063	1.06725	0.853262	0.965219	1.36972	0.989124	1.01242	1.09227	1.17938	1.14413	1.00046	1.09996	1.17517	1.13821	0.973412	1.01257	1.0304	1.31493	1.00073	0.683473	1.2072	1.22213
657	0.678943	1.01784	1.56744	0.95768	1.0404	0.930628	1.71499	0.574675	1.11731	0.986825	1.03135	0.879352	0.744794	0.667962	1.16763	0.967555	0.545499	1.7395	1.75716	1.3309	1.51178	0.946073	1.8169	0.4907	1.23993	0.536828	0.833653	0.93728	1.11462	1.80874	0.862218	0.847577	1.88951	0.650108	1.16959	1.2301	2.3477	2.25657	1.50862	1.06588	0.952617	0.700927	0.946937	0.881244	1.06677	0.926895	1.28197	0.979906	1.75383
658	1.16698	0.957895	0.498957	0.634543	1.12112	0.861257	0.881582	0.468458	0.890754	0.608698	1.1799	1.32847	0.530488	0.296267	1.56908	0.702534	0.880695	0.596632	0.470832	0.904007	0.629545	2.63519	1.66749	0.51451	0.858625	0.447575	0.759432	0.637721	1.15434	0.898351	0.795393	2.33609	0.98306	0.554825	0.431359	1.11689	0.62954	0.48493	2.10111	1.69073	0.961249	0.347906	1.12362	1.11354	1.37141	0.875646	0.260486	2.05196	1.22595
659	1.41026	1.02578	0.823163	0.903437	0.713509	0.660867	0.875934	1.34554	0.86252	0.866722	0.745574	0.913103	0.713123	0.777852	0.813902	0.843064	1.0293	0.765616	0.54759	0.817486	0.749216	1.035	0.976056	0.90431	0.888798	1.002	0.742896	0.914848	0.880176	0.736844	0.928773	1.04201	0.927325	0.789901	0.753545	0.895406	0.731417	0.712418	0.938986	1.06551	0.809812	0.682428	1.00667	0.876625	0.987347	1.42443	1.44491	1.00366	1.2233
660	1.02631	1.1723	1.08424	1.00479	1.10067	1.07103	1.15098	0.952839	1.10041	0.966441	1.19771	1.29659	1.39006	0.958357	1.26063	1.42684	1.25806	0.96686	0.872993	1.14191	1.06892	1.32791	1.12417	1.11984	1.15426	0.99204	1.28986	1.02792	1.14766	0.975174	0.936305	1.66542	1.04691	1.03345	0.946402	1.05984	1.11019	0.974079	1.19046	1.18241	1.11151	1.06057	1.14787	1.10163	1.26943	1.19356	0.904371	1.36201	1.29896
661	0.98257	1.39202	1.13669	1.07904	1.30976	1.21934	1.31897	0.822462	1.06752	1.13908	1.3207	1.47026	1.30854	1.03189	1.30577	1.24751	1.19334	0.897935	0.93109	1.26088	1.01072	1.28689	1.06247	1.09762	1.15295	0.932306	1.61613	0.858549	1.17703	0.862678	0.963675	1.32561	0.952392	1.02853	1.10019	1.29225	1.13456	1.05953	1.05791	1.18708	1.1454	0.972351	0.959903	1.08644	1.48802	0.948864	0.637375	1.28839	1.16101
663	1.36686	0.929761	0.746865	0.813979	0.68413	0.592137	0.730836	1.23308	0.818566	0.750019	0.676961	0.829789	0.623914	0.66035	0.788465	0.781931	0.952624	0.689057	0.543294	0.771032	0.670454	1.09605	0.994854	0.883798	0.887265	0.894502	0.724444	0.858195	0.846453	0.680305	0.859608	1.10727	0.848206	0.680278	0.66145	0.804894	0.695025	0.64277	0.959645	0.960223	0.646653	0.628986	0.990432	0.812592	0.901095	1.3435	1.40916	0.959055	1.25533
664	1.10845	0.844898	0.377649	0.514008	1.08054	0.770834	0.816938	0.398114	0.851607	0.524664	1.1542	1.21134	0.550626	0.20619	1.38265	0.589955	0.812131	0.55534	0.538453	0.813715	0.706904	2.42292	1.44262	0.469994	0.778614	0.365288	0.755142	0.552912	1.09749	0.82101	0.62024	2.28888	0.776176	0.41157	0.376612	1.10367	0.488884	0.398757	1.88737	1.58827	0.751438	0.338581	0.929695	1.02179	1.14399	0.706353	0.219006	1.47841	1.21022
665	1.29093	0.843529	0.672365	0.715273	0.675292	0.535998	0.739468	1.06471	0.771073	0.673471	0.672009	0.782734	0.565228	0.599909	0.833994	0.783173	0.934069	0.632288	0.592621	0.767988	0.612088	1.15908	1.09703	0.89345	0.91971	0.782958	0.800105	0.864435	0.870497	0.722956	0.830719	1.16183	0.808875	0.606314	0.601665	0.75621	0.718039	0.612858	0.984451	0.936177	0.646954	0.617059	1.04297	0.774181	0.82574	1.24323	1.28942	0.95029	1.38945
666	0.946492	1.08332	0.925743	0.952971	1.03167	1.02578	1.35184	0.844042	1.0436	0.959775	1.13038	1.17284	1.05649	0.871967	1.30252	1.16679	1.06062	1.13427	1.24805	1.0914	0.904932	1.34732	1.15171	1.10888	1.17343	0.956412	1.24589	0.918257	1.15019	1.19097	1.18803	1.49226	0.91907	0.941523	1.04054	1.12665	0.956755	1.18064	1.23121	1.1853	1.11239	0.965004	1.144	1.02322	1.2256	1.04506	0.883659	1.44157	1.20159
667	1.01598	1.11792	0.953128	0.969144	1.05361	1.02545	1.07694	0.931514	1.10696	0.974783	1.15241	1.15679	1.02661	0.895068	1.28676	1.0831	1.11981	0.873705	0.701957	1.06696	0.971294	1.35559	1.1702	1.17498	1.18401	1.0399	1.22222	1.04086	1.10027	0.876904	1.12438	1.33989	0.992236	1.03881	1.09193	1.12969	0.994191	0.84033	1.27001	1.23766	1.15777	0.977637	1.13644	1.11444	1.20786	1.2241	0.945985	1.35789	1.26843
668	1.39773	1.4289	1.14088	1.16979	1.38583	1.23623	1.14444	1.12683	1.27715	1.03817	1.57725	1.5188	1.44891	0.972293	1.1873	1.07458	1.45225	1.007	1.04485	1.34936	1.21406	1.25455	1.17261	1.0567	1.53895	0.868583	1.4425	1.34626	1.39892	1.08803	0.999473	1.23754	1.24235	1.03476	1.08739	1.38106	1.11946	0.986989	1.1895	1.31736	1.11648	0.910304	1.54733	1.40322	1.45469	1.33035	0.877271	1.38329	1.42313
669	0.742745	0.824913	1.01841	0.857102	0.886795	0.917608	1.58842	0.562595	1.33059	0.834743	0.738744	0.902976	0.610981	0.735142	0.853866	0.66978	0.640961	1.90299	1.30523	1.23337	1.14697	0.634576	1.17189	0.541572	1.23228	0.544864	0.803197	0.565353	0.791832	1.23982	0.483179	0.553193	1.47679	0.688943	0.753821	0.973628	1.07182	1.25662	1.16161	0.841857	0.624	0.54247	1.26667	0.727939	0.960197	0.950788	0.606899	0.781658	0.87847
670	1.36668	1.21956	1.13956	1.3578	1.23876	1.13007	1.23468	1.05284	1.20557	1.37228	1.29712	1.43784	1.10529	1.15814	1.32703	1.26238	1.29519	1.08297	1.03587	1.12513	1.12648	1.65067	1.38327	1.07003	1.21518	0.981511	1.12823	1.249	1.26186	1.05128	1.38669	1.64403	1.33837	1.01056	1.09514	1.24466	1.16152	1.17517	1.76581	1.4679	1.50524	0.927719	1.32921	1.15555	1.35535	1.35139	1.11045	1.47444	1.31484
672	0.980092	0.634816	0.316388	0.407765	0.910492	0.63034	0.665999	0.365806	0.859974	0.386362	0.937254	0.808216	0.517794	0.225231	1.0551	0.456748	0.742261	0.553728	0.771015	0.704294	0.849783	1.80664	1.63622	0.405616	0.758714	0.281571	0.594965	0.507334	0.899195	0.656102	0.437284	1.57407	0.639209	0.326739	0.299406	0.939017	0.342457	0.335831	1.34319	1.2658	0.557932	0.297013	0.844639	0.825064	0.86236	0.526649	0.276635	1.17386	1.07071
673	0.997984	1.05203	0.980607	0.863976	0.884736	0.836319	1.08915	0.962511	1.31511	0.958504	1.12434	0.893484	0.861551	0.830114	1.18349	1.09903	1.08646	0.930969	0.890381	0.988291	0.940793	1.15254	1.19	1.17559	1.21389	1.07219	1.09981	1.07032	1.00534	1.04972	1.09631	1.25536	0.894379	0.956594	1.20422	1.11926	1.00222	0.948121	1.33739	1.13827	1.03746	1.01567	1.08797	1.11792	1.01346	1.21442	1.0933	1.0557	1.1071
674	0.876163	1.16045	0.772337	1.17796	1.4191	0.847989	1.12275	0.746414	0.932216	1.17152	1.10794	0.861051	0.676234	1.05312	1.18738	0.82071	0.651371	0.653288	0.663652	0.956573	1.10153	0.956562	0.504365	0.556028	0.870098	0.689119	0.820472	0.75526	1.15903	0.727598	0.664538	0.732352	0.882842	0.548583	1.07286	1.05481	0.601143	1.2709	0.834868	0.922624	0.967177	0.590046	0.707792	0.954182	1.21513	1.06569	0.961197	0.849465	0.589396
676	1.01087	1.09754	0.929289	0.91465	0.958968	0.913555	1.11213	0.908389	1.19398	1.03618	1.1707	0.924688	0.831961	0.814646	1.15422	1.08948	1.03337	1.00089	1.15376	1.08651	0.975774	1.15467	1.02249	1.09617	1.25904	1.02638	1.17675	1.06354	1.06338	0.973795	1.07984	1.21193	0.854775	0.976817	1.3325	1.24014	0.990071	1.16144	1.20947	1.15849	1.00587	0.975454	1.13148	1.10844	1.04338	1.20085	1.06985	1.20458	1.08512
677	1.38632	1.60921	1.3516	1.3627	1.57706	1.47145	1.28942	1.05494	1.29336	1.34905	1.73175	1.78692	2.0469	1.15982	1.31976	1.35884	1.68239	1.12522	1.12008	1.52513	1.55836	1.43148	1.29583	1.04469	1.4667	1.03202	1.77672	1.17611	1.35977	1.15135	1.08686	1.27283	1.29163	1.11973	1.30264	1.60288	1.38538	1.14579	1.24258	1.42596	1.22179	1.01088	1.66231	1.38656	1.56056	1.20889	0.752462	1.4624	1.50607
678	0.740611	0.934585	0.707528	0.914816	0.930062	0.888273	1.42331	0.777203	1.03293	0.832744	0.977128	1.02062	0.931243	0.796683	1.26825	0.98239	0.936612	1.58454	1.75397	1.00837	0.987663	1.39826	1.00315	0.977671	1.25394	0.862301	1.09806	0.990218	1.19549	1.53628	1.29301	1.17547	0.759083	0.903416	1.00079	1.00773	0.845734	1.39879	1.16714	1.18212	0.9856	0.818727	1.18727	0.910789	1.13652	1.10215	1.27593	1.46666	1.1924
680	0.886016	0.574616	0.380023	0.265178	0.730256	0.45933	0.474178	0.355332	0.954567	0.411281	0.946953	0.740842	0.577164	0.278826	0.8547	0.338709	0.70663	0.742827	1.66825	0.869978	0.808146	1.16342	1.49453	0.325285	0.745886	0.352077	0.637339	0.52179	0.62148	1.57402	0.420219	0.926136	0.650729	0.217034	0.363892	0.853532	0.322056	0.372722	0.921253	0.812214	0.398739	0.31594	0.914367	0.844721	0.848184	0.535164	0.335581	1.17963	0.884716
681	0.987623	0.706594	0.56338	0.394972	0.718183	0.449446	0.549637	0.454602	0.923071	0.44842	0.912822	0.800134	0.741574	0.358831	0.964546	0.462762	0.777821	0.69881	0.909779	0.682971	0.592711	1.06317	1.4219	0.515375	0.769902	0.458846	0.734572	0.672206	0.724236	1.94728	0.506783	0.873512	0.814478	0.324648	0.39194	0.916965	0.508826	0.435921	1.12674	0.764496	0.497521	0.227133	0.913217	0.821924	0.866606	0.826382	0.41407	1.22964	1.06539
683	2.10566	2.33302	2.48789	2.20499	2.2051	1.85661	1.33092	1.43789	1.71737	2.39868	2.24112	2.78123	6.02404	1.7137	1.23584	1.28844	2.47116	1.45382	1.71955	2.15943	4.08095	1.40256	1.47372	1.34139	1.98201	2.03971	2.82044	1.79928	1.668	1.91614	1.17242	1.38598	1.77738	1.29733	1.96895	2.0162	2.82444	1.49209	1.29671	1.28844	1.29276	1.60836	2.41863	1.74938	1.97987	1.7405	0.993514	1.48325	1.69463
684	1.45593	1.13986	1.28555	0.944968	0.959143	0.875392	1.04148	0.864361	0.964207	1.17239	1.06987	0.9977	0.561533	0.777751	1.54483	0.610652	0.912209	0.783612	0.610241	0.693116	0.889224	2.38896	1.77372	0.892001	0.966829	0.954892	1.22917	1.14229	1.20392	1.42172	1.12398	2.66325	1.06662	0.781128	1.01257	0.996285	0.67934	1.10387	2.95628	1.43167	1.46009	0.642613	0.939784	1.24435	1.44729	1.05812	0.734061	2.43366	1.28662
685	0.999692	1.19767	0.879455	1.03065	1.11014	0.9088	1.28761	0.838642	1.25006	1.15301	1.25512	0.981006	0.821512	0.838798	1.2411	1.10767	0.981636	1.18809	1.51758	1.21429	0.962448	1.21335	0.938595	1.03161	1.31633	1.00404	1.26302	1.03021	1.18351	1.1395	1.11727	1.14593	0.8098	1.00024	1.48429	1.38417	1.00363	1.51984	1.36809	1.30035	0.992034	0.96808	1.22377	1.14064	1.19012	1.17203	1.04633	1.26854	1.08258
686	0.894398	1.07955	1.16341	2.37111	2.12682	1.62202	1.62926	0.792947	2.26777	1.05703	0.971658	1.131	1.59865	1.09815	1.34887	1.11796	0.915098	2.15546	1.37552	1.15148	1.67359	1.21702	1.03561	0.723538	1.56969	0.674133	0.929702	0.727863	1.68191	1.40669	0.978987	1.14736	2.56214	0.917768	1.11807	1.11144	1.49917	1.70249	2.78582	2.38868	1.27192	1.16962	1.48601	0.966051	1.30032	2.09887	1.07227	0.82444	0.938034
688	1.3368	1.53469	1.32023	1.32564	1.58158	1.47105	1.31015	0.989801	1.24578	1.39682	1.47279	1.60598	2.38344	1.13835	1.35248	1.26889	1.55515	1.0703	1.05759	1.38911	1.6138	1.43702	1.28826	1.10659	1.30434	1.04479	1.8204	1.13176	1.34661	1.15001	1.1424	1.35123	1.24533	1.06939	1.29601	1.46569	1.36906	1.15507	1.27735	1.43544	1.24646	1.06923	1.45972	1.22189	1.53196	1.2379	0.791119	1.43765	1.47057
690	1.2148	1.44302	1.03209	1.44012	1.41506	1.1846	0.950627	1.12071	1.41681	1.49987	1.4888	1.23673	1.46502	0.902911	1.21543	1.01081	1.32501	1.61764	2.14791	1.42805	1.27676	1.34134	1.01748	0.947544	1.63697	1.17487	1.66023	1.18598	1.58599	2.35772	1.16132	0.876104	1.11043	1.22364	1.63877	1.99389	1.3255	0.985643	1.34465	1.30579	1.03106	1.26269	1.57905	1.26144	1.45799	1.46355	1.38738	0.970318	1.24978
691	2.41702	2.45337	2.41785	2.34682	2.49368	2.15571	1.33104	1.33442	1.75872	2.24977	2.31419	2.67159	10.8906	1.80487	1.22055	1.22484	2.73622	1.56891	2.02449	2.27638	4.26624	1.37665	1.21985	1.38101	1.97158	2.10315	2.7514	2.13149	1.82111	2.16235	1.05911	1.12835	1.70308	1.24098	1.96635	1.91398	2.90493	1.32232	1.27187	1.18139	1.26803	1.77595	2.39409	1.75667	2.06662	1.9336	1.14664	1.49136	1.6695
692	1.14799	1.11674	1.10179	0.883564	1.02999	1.03871	1.02283	0.935856	1.08431	0.94402	1.18078	1.1456	1.1055	0.913366	1.20263	1.07736	1.20506	0.644498	0.487055	1.03587	0.943395	1.27339	1.18568	1.21311	1.06741	1.01834	1.19003	1.02158	0.974707	0.6592	0.980518	1.2915	1.0963	1.12069	0.950282	1.02875	1.08011	0.699405	1.16979	1.16614	1.14144	1.09577	1.06455	1.14305	1.08644	1.22518	0.783952	1.23429	1.22835
695	1.16629	1.22351	0.957144	1.0559	1.21218	1.09032	1.14919	0.927428	1.17843	1.02102	1.16464	1.34077	1.09458	0.962975	1.42243	1.11519	1.16774	0.91761	0.944577	1.23496	1.11539	1.60452	1.23867	1.11083	1.31923	0.981339	1.33833	1.1919	1.34006	1.04156	1.18879	1.45109	1.09679	0.951392	1.15319	1.29826	1.04117	1.03506	1.43213	1.40115	1.33071	1.09395	1.28434	1.18709	1.40145	1.45664	1.08011	1.55083	1.30082
696	0.992819	1.56238	0.902761	1.14319	0.978508	0.935289	1.06356	0.805509	1.49997	1.15259	1.24408	1.31421	1.64192	0.799072	1.8124	0.995242	1.15517	1.45609	1.71097	1.15513	1.54545	1.94911	0.917065	1.2146	2.25784	1.2107	1.58153	1.38147	1.86956	1.68104	1.03368	1.34776	1.04037	1.29511	1.6979	1.7093	0.974801	1.13053	1.50777	1.37672	1.26085	1.16618	1.82645	1.00359	1.35819	1.25078	0.994898	1.70505	1.23367
700	1.5899	1.81932	1.36354	1.76699	1.95346	1.48247	1.21536	0.953227	1.54951	1.55111	1.55892	1.91293	2.71711	1.05318	1.75313	1.0693	1.54769	1.54141	1.96326	1.80774	2.27946	1.93142	1.34519	1.33373	2.13851	1.27217	1.87875	1.59126	1.87405	1.7301	1.26303	1.55177	0.825561	1.38993	1.59273	1.87709	1.62634	1.3018	1.49145	1.45296	1.38971	1.5811	2.14593	1.40801	1.91213	1.84177	1.28297	1.83596	1.41363
704	0.859849	1.25101	0.903355	0.983956	0.951281	1.05748	1.2482	0.794494	1.32435	1.0627	1.18402	1.045	0.937768	0.883472	1.48635	1.13164	0.892244	1.2198	1.2428	1.04645	1.09395	1.83245	1.2769	1.10032	1.78521	0.980935	1.28975	1.03391	1.29848	0.892279	1.3627	1.4042	0.77198	1.0907	1.46093	1.4703	1.06127	1.31796	1.52151	1.33618	1.23461	1.08793	1.44637	1.06574	1.05888	1.24153	1.02889	1.65922	1.1514
707	0.961691	1.04744	0.911572	1.30189	1.32135	1.33287	1.25526	0.821107	0.75727	1.07282	0.88606	1.12265	1.31886	1.0204	1.1451	1.1268	0.978891	0.948819	1.15949	1.01114	1.06166	1.26028	0.969936	0.946727	0.946646	1.07608	1.12185	1.00563	1.13704	1.86426	1.14376	1.09788	0.902667	1.0029	0.959581	1.02408	0.939817	0.953431	1.32338	1.16198	0.976641	0.859182	0.909604	0.950612	1.03237	0.934624	0.876256	1.30976	0.896027
708	0.838088	0.736521	0.887907	0.622563	0.590468	0.80117	0.912917	0.673954	0.679696	0.719012	0.720054	0.664479	0.590088	0.723241	0.819809	0.680288	1.08618	0.830908	4.97565	3.50844	0.826831	0.706114	0.790871	0.815352	0.796319	0.710153	0.848166	0.741348	0.616134	0.871378	0.63619	0.632956	0.775241	0.839556	0.673343	0.801988	0.735265	1.27473	1.23819	0.712401	0.636311	1.16915	0.664559	0.681736	0.763974	0.838098	0.644843	0.690471	0.907813
709	1.04892	1.17428	1.13445	1.19608	1.17823	1.48773	1.21678	0.801125	0.811035	0.981362	0.987287	1.30544	1.08435	1.41114	0.851815	0.891962	1.32317	1.07923	1.27293	1.14415	1.15562	1.16641	1.36597	0.952348	0.902238	1.20948	1.36638	0.738874	1.23038	1.73911	0.922402	0.840318	2.83839	1.18251	1.06952	1.00865	0.962877	1.21509	1.27967	1.02823	1.40908	1.14538	0.944386	0.984028	0.897163	1.11101	0.812021	0.980135	1.14844
712	0.894288	1.08162	0.948029	1.19555	1.14242	1.19001	1.10721	0.88373	0.926985	1.0203	0.924908	1.15656	1.31612	1.00596	1.19384	1.05071	0.94082	0.889998	1.15194	1.04724	1.14799	0.880367	1.14516	1.06107	1.09374	0.956047	1.1143	1.1004	1.10127	1.25755	1.22197	1.24679	0.813429	1.03933	0.893041	1.06508	0.994874	0.662511	0.868465	1.30224	1.00565	0.900879	1.00735	1.00315	1.17851	1.03269	0.983392	1.48307	1.08795
713	1.11046	1.20484	0.948537	1.13056	1.33979	1.1282	1.36384	0.848174	1.238	1.12422	1.27673	1.37695	1.1742	0.901652	1.57967	1.11615	1.19063	1.18007	1.24735	1.31571	1.1667	1.82894	1.3065	1.08905	1.45056	0.886021	1.42617	1.14776	1.39547	1.58798	1.2424	1.45334	1.31064	1.02226	1.19998	1.43564	1.16143	1.22519	1.56417	1.5016	1.35406	1.09889	1.37095	1.18026	1.54943	1.37389	1.0582	1.73603	1.40263
714	0.771518	1.06442	0.992637	1.08913	1.17264	1.15432	1.20818	0.879083	0.926519	1.02573	0.888984	1.0917	1.1047	1.4092	1.21069	1.20919	0.993465	0.715448	1.12367	1.21987	1.01423	1.20742	1.09213	0.951392	1.11564	1.01727	1.23993	1.03712	1.01131	1.29919	1.2688	1.2341	0.826935	1.07272	1.22902	1.20415	0.959051	1.02209	1.27906	1.36272	1.07296	0.995755	0.855676	0.966037	1.24169	1.10642	1.16688	1.32095	1.10959
715	0.930287	1.07749	0.942309	1.04731	1.09647	0.973755	1.15583	0.977327	0.688723	1.04784	1.09391	1.28798	1.12662	1.03464	0.95198	1.07928	1.53953	0.788312	0.924437	1.09785	1.18914	1.17086	1.20332	1.22088	1.04843	1.19769	1.40457	0.912545	0.903612	1.17522	1.02496	1.07627	1.77586	1.2597	1.34541	0.849777	1.02527	0.808176	1.05384	1.23673	1.39798	1.378	1.22545	1.00033	0.985461	1.02133	0.729997	1.20992	1.1696
717	1.245	1.11132	1.11795	1.03895	0.800284	0.78156	0.761328	1.5146	1.11933	0.96955	0.954703	0.88322	0.781301	1.29311	1.23539	1.33927	1.237	0.574026	0.487306	0.780029	0.890427	1.10504	1.36278	1.01655	0.839182	1.0486	1.31736	1.11019	0.889669	3.11175	1.10144	1.16123	3.4995	1.10524	1.4214	1.17773	0.854828	0.888678	1.06958	1.06219	1.98645	0.736763	0.963828	0.992336	0.556863	0.950696	1.44698	1.29512	1.03633
719	0.826666	1.03099	1.18869	1.08668	1.13048	1.29151	1.14441	1.05035	0.708934	1.10216	1.33185	1.15824	1.11588	1.06028	1.13397	1.3222	1.02908	0.773619	1.05458	1.03174	0.97907	1.13164	1.16315	1.03938	1.0718	0.998011	1.1777	0.918621	1.0692	1.38973	1.19282	1.31743	0.614012	0.955136	1.06081	1.1544	1.24502	1.00449	1.1986	1.19042	0.944874	0.951211	0.877106	0.995163	1.17654	1.02155	0.842096	1.36972	1.05679
721	0.997449	1.16654	1.0206	1.10249	1.07422	1.18321	1.23348	0.872407	0.970834	1.03198	1.06676	1.10487	0.852041	1.14838	1.11474	1.18239	1.02284	0.74599	0.876509	1.11939	1.02903	1.22493	1.06693	0.925263	1.09748	1.05966	1.1372	1.03356	0.991354	1.00015	1.22751	1.20609	1.00908	1.04215	1.05762	1.00259	1.05647	1.03158	1.37853	1.26483	1.14529	0.882453	0.96949	1.06116	1.1373	1.0518	0.919231	1.32041	1.17446
722	1.31902	1.38306	1.09198	1.17266	1.34509	1.1706	1.07398	0.954851	1.14713	1.18418	1.27721	1.48894	1.30155	0.983935	1.32138	1.13415	1.21425	0.723449	0.756648	1.26203	1.15074	1.42792	1.27151	1.10505	1.18236	1.0817	1.40582	1.10101	1.26255	1.03031	1.00966	1.32345	1.36428	0.986823	1.20194	1.31309	1.057	0.8051	1.39539	1.344	1.36104	1.08272	1.16573	1.23534	1.43994	1.37139	0.933867	1.37944	1.29216
723	1.30778	1.23286	1.18014	1.47944	1.51635	1.44089	1.09809	0.859301	0.872708	1.17382	1.09087	1.53466	1.4221	1.25298	1.04687	1.15591	1.37855	1.19563	1.11597	1.41685	1.04402	1.18833	1.26831	1.08548	0.964517	1.17779	1.5047	0.87758	1.08427	0.847982	1.0148	0.956969	1.47754	1.54837	1.08376	1.25616	1.20442	2.14332	1.38793	1.11206	1.11296	1.3536	1.00109	1.04821	1.32543	1.32996	0.790396	1.30235	1.12511
725	0.862365	1.09131	0.945987	0.796165	0.805954	0.795676	0.959816	1.01	1.0836	0.928165	0.787809	1.0674	0.920528	1.082	0.877056	0.848561	1.16027	1.08374	0.756184	0.934297	0.98907	0.860989	0.826237	1.08985	0.963944	1.27317	0.99488	0.969381	0.977355	0.954444	0.921792	0.841753	0.857367	0.952558	0.966891	1.06208	0.962046	0.937724	0.807386	0.856133	0.748912	1.73769	0.697473	0.939164	0.632493	1.13294	1.35358	0.879136	0.972825
726	0.741623	0.776882	1.9654	0.649809	0.652529	0.846402	0.873283	0.684786	2.93958	0.710614	0.614645	0.742955	0.659308	0.842226	0.814864	0.802302	0.799697	3.33752	7.87581	9.75913	1.61927	0.683642	1.22812	0.720469	0.936859	0.809876	1.04177	0.715602	0.746174	2.85691	0.696156	0.724385	1.45956	0.872677	0.809581	0.910772	6.43493	2.47578	1.89273	1.19308	0.697432	1.0831	0.813723	0.59263	0.930255	0.909849	1.01674	0.802431	1.94282
727	0.857123	1.26959	1.00272	1.19292	1.15265	1.1976	1.14497	0.8965	1.11463	1.10419	1.14481	1.25671	1.17439	1.15588	1.22995	1.17807	0.906022	0.674451	0.886001	1.12677	1.13862	1.27963	1.53297	0.916735	0.9296	1.21794	1.15069	1.12388	0.982969	1.15135	1.15956	1.23122	0.850052	1.092	1.00491	1.166	1.11378	0.803312	1.25043	1.3143	1.10203	0.841177	0.932217	1.12174	1.20302	1.01477	0.805338	1.33106	1.01664
731	1.42855	1.29942	0.930064	1.03865	0.816689	0.791077	0.94211	1.41595	1.0356	1.064	1.01332	1.02373	0.936322	0.912681	1.14138	1.09025	1.37261	0.597805	0.531724	0.699076	0.839762	1.04797	1.27409	0.889401	1.1154	1.14377	0.99748	1.12044	0.968543	4.51408	1.08393	1.02849	4.07102	1.10474	1.22706	1.3562	0.978682	0.832481	1.05974	1.09446	2.35323	0.514162	1.19807	0.936226	1.17438	1.14538	1.07593	1.19935	0.96939
734	1.57444	1.27392	1.00938	1.06438	0.868001	0.955943	0.930374	1.2245	1.04652	1.05704	1.11806	1.06448	0.91699	1.10949	1.06588	1.15002	1.38986	0.650701	0.576241	0.723029	0.824847	1.07463	1.15521	0.819954	1.0546	1.10848	1.00687	1.19091	1.14516	6.63748	1.16932	1.04153	5.044	1.03612	1.22181	1.41069	0.879116	0.839461	0.960269	1.11915	3.15258	0.572323	1.2981	1.07873	1.17764	1.16021	1.20715	1.21667	1.03406
735	1.4466	1.28461	1.04107	1.21213	1.00708	0.935872	1.1201	1.12953	1.00242	1.23158	1.18242	1.19103	0.960186	1.19146	1.14781	1.17349	1.34205	0.698871	0.632342	0.739911	0.897508	1.1754	1.18077	0.85155	1.02582	1.08981	1.14944	1.08041	1.12205	6.36953	1.25227	1.03235	5.39838	1.0275	1.37592	1.55748	0.983295	1.0725	1.03036	1.2703	3.44318	0.55276	1.32339	1.1141	1.14675	1.16073	0.952166	1.28919	1.05325
736	0.958342	0.995859	0.969509	0.827053	0.880436	0.992531	0.985466	0.941576	0.89062	0.804683	0.968377	1.0921	1.02463	1.01491	0.972256	1.01065	1.19221	0.759441	0.89327	0.946698	0.744853	0.985765	1.02921	1.04161	1.01074	0.977098	0.921547	0.832677	0.868084	0.832688	0.962988	1.05148	1.00817	1.12398	1.0388	0.955124	0.919716	0.750255	0.965436	1.00368	0.966762	1.28634	0.968325	0.919882	0.975625	0.919752	1.20651	1.09339	1.03963
737	0.980356	1.1676	1.37198	1.09084	1.11012	1.26627	0.921053	1.0512	0.779112	0.97035	1.12667	1.22916	0.910274	1.06628	0.990909	0.923398	1.6242	1.25453	0.844289	0.966852	0.879247	0.954444	0.861759	1.33527	1.01609	1.06411	1.18899	0.959824	1.02455	0.938647	1.02997	0.887002	1.27399	1.2011	1.15131	1.45306	1.25723	0.855371	0.930184	0.94848	1.01779	1.24934	1.00015	1.19414	0.605071	1.09339	0.970506	0.844042	1.18778
738	0.751058	1.12211	1.02437	1.18942	1.15713	1.07242	1.02782	0.858765	1.00676	1.08645	1.06865	1.11705	1.03334	1.10535	0.808356	0.925355	0.748376	1.67282	1.67291	1.29021	1.39602	1.14253	1.15475	1.01913	1.38268	0.97501	1.27431	1.2773	1.19247	1.81504	1.03574	1.05432	0.878382	0.936577	1.29602	1.3832	0.98541	0.822955	0.876684	1.20696	1.22734	0.932323	1.19464	1.05887	0.944143	1.08952	1.50868	0.903022	0.870516
739	0.660219	1.06068	1.43163	0.897282	0.899533	0.840511	1.94308	0.601821	1.88234	1.40988	0.765647	0.971903	0.949233	1.30245	1.05106	0.876376	1.02541	2.40802	1.65384	1.72802	2.03327	1.10591	2.07538	1.74607	1.37642	1.37283	1.49487	0.767451	1.23463	2.5462	1.06131	1.01632	4.38363	1.40898	1.41795	0.902236	3.31742	1.05446	0.917988	0.980218	1.13883	1.25211	1.9848	0.834183	0.915764	1.95316	3.35234	1.11971	1.31502
742	0.875463	0.754956	7.13752	0.878196	0.881323	0.925723	1.07658	0.683462	0.558085	1.17215	0.800615	1.01617	1.09328	0.57718	0.887827	0.676323	1.19773	0.936173	4.50577	3.92972	2.06067	1.04175	2.11211	1.48473	0.87935	0.955929	1.14395	0.702206	0.918604	1.65757	0.907455	0.682066	2.69004	1.25787	1.06124	0.943496	1.85502	1.46163	1.15804	1.03386	0.913781	1.0788	0.834432	0.867701	0.987638	0.89644	0.695376	0.682331	3.2753
744	0.910108	1.06555	1.05284	1.18486	1.17748	1.14752	0.944444	0.737819	0.994747	0.911201	1.11205	1.05092	1.07217	1.27705	0.85533	1.03175	0.93692	1.41136	1.27152	1.07903	1.28298	0.911768	0.856534	0.777791	1.24513	0.980654	1.06605	1.02636	1.04091	1.34028	0.761326	0.845353	0.929498	0.883032	1.09049	1.14066	1.03527	0.852965	0.835178	0.771722	1.04129	0.924078	1.08952	1.07926	0.848313	1.14968	1.30481	0.748644	1.13157
745	1.20504	1.38274	1.1708	1.32086	1.73343	1.56916	1.18384	1.10765	1.3848	1.26965	1.66257	1.44023	2.23011	0.842695	1.4692	0.952176	1.2925	1.72918	1.91265	1.48135	1.85395	1.04519	1.08383	1.18154	1.77835	1.08931	1.66568	1.13846	1.5894	2.64025	1.0248	1.19101	2.48684	1.44134	1.39848	1.69058	1.57321	0.81861	1.02868	1.28002	1.29747	1.38614	1.65106	1.5594	1.37566	1.7027	1.34868	1.48611	1.54002
747	1.35297	1.26328	1.07894	1.12798	1.07719	1.08551	1.17333	0.871483	0.981258	1.26207	1.32967	1.24289	1.14284	0.955011	1.1541	1.18247	1.38424	0.746161	0.734021	0.852314	0.93619	1.13225	1.18821	0.685252	1.00999	0.984461	1.21371	0.991395	1.06865	6.35421	1.16424	1.02169	5.28281	0.987204	1.24768	1.47877	1.08062	1.16853	0.98955	1.30937	3.47885	0.545026	1.20562	1.15019	1.16508	1.05781	0.75818	1.31806	1.04952
753	1.2312	1.85547	1.44246	0.910238	0.917702	0.796959	0.881719	2.09206	1.21706	0.710575	0.850805	0.902599	0.921434	1.10465	1.06663	0.706901	0.752344	0.793622	0.936437	1.00796	1.2753	1.18541	0.904043	1.66477	0.902043	3.69691	0.704266	2.31407	1.00599	2.84278	1.07739	1.37934	2.21433	1.17518	0.481796	1.33302	0.868613	0.761357	1.44151	1.15967	1.08345	1.11108	1.07252	0.880338	0.933517	3.03946	2.71221	1.38398	1.77217
756	1.36659	1.34332	1.31631	1.22188	1.18593	1.20982	1.2552	0.762797	0.996802	1.54043	1.66717	1.43295	1.49772	0.988121	1.21112	1.25782	1.4081	0.844878	0.8584	0.981115	1.05799	1.20816	1.1038	0.699658	1.03802	1.01285	1.40456	0.899957	1.04402	6.04284	1.14707	1.05491	4.18391	0.959698	1.32577	1.59575	1.34197	1.2407	1.0655	1.2965	2.92564	0.567066	1.22747	1.26235	1.14153	1.04725	0.668756	1.36533	1.18904
757	1.27089	1.17404	0.727091	1.37731	1.66229	1.53622	1.27968	0.630513	0.689838	0.934377	0.827276	1.4185	1.41541	0.963876	0.85249	0.80527	1.03681	1.50756	1.40446	1.13141	1.31366	1.09256	0.865183	1.00493	0.856148	0.692719	0.891812	0.712852	1.21032	1.24997	0.957921	0.764499	1.50589	1.20217	0.816037	1.23553	0.868733	1.18252	0.985424	1.01523	1.1775	1.43313	0.686089	1.10035	0.908974	1.02752	1.40865	0.984376	0.685061
760	1.23852	0.960329	0.526009	1.51626	1.77867	1.73221	1.48865	0.559856	0.430985	0.757689	0.528372	1.03794	1.22906	0.817028	1.14781	0.585751	0.886257	1.33553	1.66271	0.899837	1.76042	1.18612	0.609593	0.959288	0.603313	0.418046	0.634934	0.685792	1.41672	0.705824	1.0238	0.790736	0.820062	1.07319	0.465146	0.802741	0.890241	1.26571	1.20314	1.10623	1.12175	1.57977	0.490446	0.94608	0.634299	0.787999	0.530468	1.19947	0.507413
762	1.35493	1.08662	0.890401	0.972848	0.765275	0.782117	0.827935	1.43673	1.12088	0.77995	0.723046	0.941731	0.984187	1.68232	0.932731	0.974548	0.912775	0.756273	0.843097	0.894746	1.1291	0.974439	0.917294	1.18799	0.962072	1.95419	0.898084	1.63686	0.971868	0.658457	1.10303	1.40933	1.15162	0.902946	1.08387	0.900391	0.870938	1.47469	1.1801	0.882242	0.933512	1.06906	1.09209	0.956308	0.716214	2.86129	2.52347	0.970801	1.0109
765	1.56551	1.09208	1.01416	1.02642	0.908855	0.794705	0.865531	1.26921	1.18793	0.774443	0.750583	1.02564	1.01778	1.28757	1.03808	1.00736	0.956434	0.823423	0.858169	0.916934	1.14691	1.1139	1.02815	1.1574	1.09418	2.00662	0.870669	1.61571	1.07132	0.811553	1.17347	1.13597	1.14534	0.947261	0.991514	0.928082	0.873235	1.24154	1.27968	0.843442	1.05892	1.06176	1.12367	1.05619	0.882558	2.96917	2.28969	0.980631	1.1565
766	1.1448	1.1243	0.821398	0.872352	1.01971	1.12095	1.18584	0.724244	0.999624	0.919393	1.21156	1.05327	1.18907	0.890453	1.05077	1.19753	1.05187	0.911078	1.11564	0.918881	0.813432	1.03293	0.926965	0.900487	1.01361	0.761995	1.14381	0.791031	0.925287	1.98601	1.04957	1.02144	2.05916	0.719487	0.909461	1.16513	0.75524	0.979877	1.0092	1.09308	1.18078	0.834957	0.925846	0.990638	1.08876	1.00336	0.817528	1.23168	0.967782
770	1.46318	1.19592	1.1236	1.05935	0.965416	0.938874	0.947546	1.16031	1.21488	0.871244	0.875807	1.02814	1.04394	1.1698	1.04415	1.01463	1.01094	0.894129	0.860198	0.982047	1.19627	1.135	0.97653	1.0909	1.06002	2.08887	0.999934	1.46036	1.04011	0.86521	1.15959	1.08173	1.27311	1.012	1.03268	0.987412	0.959338	1.32012	1.396	0.873908	1.07276	0.987625	1.17364	1.03928	0.871928	2.63339	1.90982	1.00271	1.15716
771	1.03203	0.89592	0.855602	0.886401	0.755607	0.912426	1.041	0.971869	0.844905	0.757772	0.748706	0.94695	0.919018	1.09597	0.886473	1.08924	1.04971	0.863135	0.897707	0.689812	0.853291	0.982491	0.775238	0.994147	1.0232	1.01925	0.898134	1.00196	1.07278	1.52402	1.09019	1.02836	1.41937	0.743117	0.849956	0.882734	0.592412	1.03438	1.04336	0.857629	2.09512	0.973691	0.821699	0.872406	1.03798	1.17965	1.40312	0.866218	1.01128
774	1.3158	1.2038	0.677784	0.904661	0.345836	0.56564	1.11346	0.496838	0.541949	0.636518	0.294244	1.0904	0.371965	1.19606	0.393188	0.768816	1.25504	0.710531	0.447869	1.15475	0.311248	1.20692	0.756929	0.834136	0.850632	1.04319	0.818241	0.79147	0.903292	0.680519	0.588305	0.574532	0.915766	0.332718	0.828144	1.09043	0.407527	1.87313	0.707299	0.528204	1.54262	0.676035	0.77839	0.262778	1.45429	1.19173	0.942432	0.576673	0.898029
776	0.864104	0.903522	0.803021	0.777532	0.7931	0.848984	1.09363	0.879985	0.973511	0.840487	0.811655	1.04216	0.9567	1.06082	0.881417	1.07161	1.02314	0.98008	1.09631	0.780056	0.902889	0.737235	0.993838	1.07149	0.980413	0.891798	1.00698	1.01562	0.940519	1.23296	0.950165	0.796702	1.72255	0.766969	0.970789	0.979121	0.686612	1.13527	1.00727	0.926455	1.002	0.961654	0.913565	0.839556	0.971023	1.10543	1.08664	0.779105	0.880032
777	1.46534	1.22075	1.13144	1.10455	1.03704	0.931393	1.0285	1.07919	1.21064	0.990446	0.994435	1.05567	1.1279	1.10805	1.19595	1.04127	0.960784	1.00016	0.929281	0.988366	1.21271	1.16514	1.03275	1.01816	1.12598	1.86956	1.08926	1.34915	1.03964	1.05518	1.20601	1.09166	1.19915	1.06524	1.52986	1.06262	1.04253	1.33108	1.42633	1.06515	1.23822	1.01639	1.10679	1.10486	1.02246	2.33706	1.60995	1.01377	1.10909
778	0.898489	1.09254	0.826299	0.851184	0.971703	0.94487	1.14973	0.784082	1.05549	0.956978	1.06969	1.11645	0.868067	0.973682	0.976986	1.11492	0.98011	1.00092	1.19943	0.858446	0.866888	0.896944	0.720466	0.961171	1.0801	0.871239	1.07606	0.901865	0.939991	1.69837	0.994135	0.962308	4.06669	0.774519	1.00784	1.13584	0.692638	1.01246	0.893453	0.96926	1.06456	0.835431	0.883307	0.950626	1.0745	1.04263	0.80559	0.897855	0.849083
780	1.10579	1.14114	1.09829	1.04876	1.0286	1.01177	1.06669	1.01	1.06869	1.00417	1.08333	1.20708	1.25937	0.893855	1.06717	1.21145	1.18657	0.920683	1.06322	1.02295	0.953845	1.08051	0.964325	1.11202	1.01254	1.13893	1.09752	0.999561	0.971478	1.15762	1.0714	1.12051	0.933601	0.956572	1.12684	1.0999	1.01793	1.05016	0.960877	1.03444	1.0706	1.06618	1.06552	1.0429	1.12883	1.20733	0.935881	1.22373	1.14214
781	0.999576	1.0513	0.962155	1.02023	1.10155	0.975966	1.04128	0.877643	1.12482	0.878968	0.964619	1.16927	0.884687	0.967311	1.04156	0.942086	0.898677	1.45187	1.46272	1.05234	0.95332	1.31742	0.989712	0.9948	1.28544	1.00228	1.15619	0.874357	1.03306	1.44762	1.04846	1.18452	1.03581	1.15551	1.07306	1.16409	1.10591	1.05113	0.991537	1.1859	1.57683	0.932496	1.16799	0.984634	1.09048	1.29769	1.13258	1.236	1.10364
783	1.38793	1.33788	1.26467	1.16607	1.07875	0.99411	1.16646	1.06167	1.3065	1.03978	1.10168	1.19101	1.27509	1.19377	1.22474	1.13967	0.972679	0.994288	1.08249	1.05936	1.3157	1.20841	0.940514	0.914995	1.23547	1.8978	1.11547	1.35546	1.03775	1.14367	1.15714	1.0069	1.15132	0.96818	1.20222	1.19935	1.08829	1.42566	1.42332	1.03382	1.203	1.00374	1.099	1.10474	0.958353	2.41	1.53756	1.20715	1.03758
785	0.970579	1.70065	1.89927	1.13387	0.759169	0.786131	1.53499	1.04075	1.31488	1.27294	1.28903	1.28537	0.975507	1.29069	1.38948	1.29374	0.88876	1.31514	1.44511	1.03667	0.888107	1.2281	0.683811	0.973065	0.927289	1.2423	0.838611	0.997452	0.907146	3.03312	1.26247	1.12496	0.874066	0.826621	1.25803	1.14766	0.820487	1.10077	0.789724	1.3733	1.27524	0.963675	0.876045	1.26929	1.10008	2.20758	1.90258	1.04498	0.825001
787	1.03741	0.963364	0.959522	0.839244	0.809185	0.870803	0.93507	1.00794	0.922666	0.875586	0.916465	0.91284	0.860014	0.84129	0.955997	0.945401	1.11208	0.81353	0.711067	0.861812	0.809788	0.972267	0.96124	1.08297	0.873014	1.0643	0.895661	0.933229	0.843289	0.770243	0.995452	0.979505	0.761356	0.865997	0.97318	0.887853	0.898354	0.854359	0.891737	0.934576	0.996484	0.988337	0.934026	0.945396	0.912174	1.22373	1.19263	0.962122	1.0413
789	0.995971	1.09874	1.16509	0.872302	0.861241	0.751157	1.08755	0.883178	1.10441	0.980129	1.15135	1.10149	1.07438	0.916789	1.11497	0.947618	0.987689	0.946426	1.05346	0.887326	0.979787	0.858156	0.878545	0.984037	1.07415	1.17284	0.989133	1.06859	0.943306	1.54817	0.873518	0.884036	0.924011	0.826437	1.15344	1.07015	0.846212	1.08387	0.862848	0.799126	0.933779	0.999081	0.923867	1.08019	0.986398	1.25844	0.914389	0.867568	0.82735
790	0.962656	1.07337	0.968721	0.937267	0.918598	0.915373	1.00814	0.915411	0.953747	0.936981	0.967592	1.05062	0.899855	0.875168	1.05782	0.977756	0.999209	0.893669	0.795107	0.938282	0.892595	1.11022	0.996929	1.08385	0.968486	1.03697	1.07038	0.883786	0.937217	0.88144	1.0281	1.05624	1.02756	0.936988	1.01176	1.00958	0.930912	0.960608	1.00195	0.997489	1.14872	0.973963	0.965987	0.9448	0.967632	1.08379	0.959121	1.05836	1.06019
791	0.977814	1.26479	0.922876	1.10349	0.906904	0.798683	0.982704	1.05829	1.15144	0.989689	0.981099	1.27362	1.08297	0.968479	1.01108	1.02631	1.20211	1.10207	0.923707	1.11056	1.06718	0.998463	1.27692	1.16228	0.937955	1.34706	1.12996	0.886983	0.968388	0.996472	1.06905	1.20856	1.04519	1.1189	0.932898	0.949895	0.915189	0.937016	0.957587	0.953518	0.780532	1.01549	1.0067	1.01503	0.975762	1.00397	1.00465	1.08846	1.1809
792	1.28501	1.36957	1.43227	1.04359	1.05452	0.913446	1.2208	0.987479	1.31052	1.0761	1.25071	1.18849	1.35858	0.974549	1.2156	1.09417	0.991496	1.1022	1.19583	1.02146	1.21784	0.982949	0.794953	0.908018	1.18782	1.51886	1.24003	1.24998	1.01991	1.67624	1.02435	0.966462	1.14108	0.899185	1.2937	1.24461	1.55602	1.17216	0.987711	0.993898	1.21951	0.871227	1.06507	1.17578	0.991002	1.58556	1.23208	0.9914	0.991437
796	0.936048	1.16513	1.30822	0.964122	0.972836	0.824	1.28991	0.802409	1.17187	1.09623	1.28667	1.20232	1.05142	0.835392	1.21601	1.0869	0.893841	1.00859	1.21685	0.975045	0.895915	0.962253	0.708829	0.854085	1.03239	0.999159	1.06169	0.999096	0.963111	1.91461	0.931127	0.905905	0.929646	0.79461	1.2854	1.21486	0.86265	1.19936	0.933278	0.981576	0.979258	0.80272	0.862592	1.11524	1.10774	1.28225	0.860996	0.940163	0.722787
798	1.05282	1.41632	1.6247	1.01697	0.711811	0.643308	1.56249	0.824825	1.26078	1.27116	1.41397	1.18387	0.763161	0.848929	1.23236	1.28391	0.753173	1.08077	1.25992	0.936931	0.779849	0.843517	0.646058	0.7454	0.920949	1.07339	0.886193	0.90983	0.813541	2.46851	0.972361	0.907308	0.720387	0.705792	1.48028	1.37424	0.83436	1.11216	0.868654	1.0825	0.991588	0.659704	0.666391	1.22924	0.942923	1.32395	1.15707	0.818456	0.639726
800	1.0607	1.18244	1.49393	0.9687	0.676203	0.778482	1.27395	0.821846	1.25122	1.1697	1.33528	1.18719	0.715945	0.746487	1.20415	1.09566	0.750681	0.951977	1.05009	0.89361	0.796861	0.830263	0.67197	0.728191	0.890413	0.965301	0.808679	0.929254	0.744747	2.50703	0.799149	0.921863	1.13367	0.725456	1.32664	1.28823	1.69731	1.0637	0.975031	1.03694	1.10427	0.636257	0.634008	1.17647	0.961281	1.27751	1.00326	0.861442	0.549231
801	0.461469	0.432445	1.00845	0.681177	0.41041	3.05765	1.14972	3.03862	1.00701	1.30155	1.23267	0.802099	0.551722	1.2818	1.40367	1.06086	4.39166	0.654206	0.866366	0.783541	1.90901	0.809771	2.8389	0.514701	0.46539	0.903869	0.502758	0.843397	0.43297	0.767963	0.717031	1.55269	0.797467	0.853943	0.505855	0.497664	0.634816	1.15929	1.01521	0.696	0.956515	0.845695	1.3178	0.967771	0.816738	0.4942	0.988895	1.5814	0.501405
802	0.970957	1.16486	1.37356	1.22707	1.44247	1.32948	1.20803	1.36328	1.12349	1.16318	1.5142	1.73013	1.21207	1.36251	1.10909	1.32879	1.08085	1.45817	2.16298	1.54677	1.15282	1.24406	1.38824	0.893383	1.12033	1.01332	1.15923	1.02926	1.24208	2.50235	0.698011	1.21664	1.90608	1.50133	1.30407	1.84793	1.3694	1.10247	1.10395	1.18288	1.29759	1.20032	1.05196	1.12091	1.13268	1.19867	1.02545	1.1759	0.851123
803	0.870604	1.15763	1.21504	0.978343	1.11756	0.992216	1.28559	0.836702	1.15123	1.13389	1.34779	1.36906	1.34698	0.899816	1.21513	1.13792	0.986634	1.07837	1.3968	1.0666	1.02107	1.03034	0.717377	0.917088	1.08098	0.915039	1.2088	0.9781	1.0306	1.73804	0.91387	0.953602	0.92534	0.860903	1.29688	1.23397	0.946487	1.17943	0.905071	1.01378	1.03622	0.906984	0.923784	1.11672	1.30922	0.99306	0.66687	1.10066	0.793993
805	0.93015	1.23595	1.02059	1.1202	1.14279	1.14558	1.31449	0.870318	1.02316	1.17496	1.12791	1.32011	1.09048	0.911315	1.42897	1.25744	1.04221	1.00634	1.04211	1.13824	1.03319	1.73338	1.23467	1.14077	1.1232	0.952777	1.33533	0.80665	1.11716	0.94893	1.24964	1.70421	1.21682	1.09743	1.11115	1.216	1.01767	1.05256	1.71791	1.28307	1.61415	1.03028	1.04842	1.00965	1.14666	1.00588	0.763492	1.42904	1.09721
807	0.603444	0.528043	1.51436	0.405599	0.209846	2.7987	1.10259	3.1371	2.6397	1.31417	0.861065	0.432367	0.604967	0.954187	0.803765	0.954368	5.02411	2.54113	2.89284	2.14327	1.46291	0.802647	1.38621	0.559482	0.908372	0.795636	0.274211	0.830726	0.582817	2.56788	0.558505	1.69886	2.28306	0.523593	0.428112	0.341728	3.69503	1.59889	1.04624	1.25839	0.98341	0.607544	1.08124	0.781138	0.718399	0.473305	0.702737	2.1475	1.27672
809	1.50202	1.21695	0.971018	0.919147	0.768118	1.00972	0.970758	1.24814	0.989172	0.867682	0.71903	1.06471	1.06965	0.971275	1.13385	0.967762	1.07557	0.972663	0.752816	0.955282	1.03013	1.50753	1.3684	1.13562	1.04057	1.11275	1.09825	0.995771	0.952428	1.03476	1.14258	1.33663	1.62287	1.00468	1.05616	0.931387	0.917499	0.73433	1.22963	1.1952	1.42937	1.09129	1.11576	1.10411	1.05798	1.64133	2.26549	1.4028	1.18697
811	1.20113	1.30996	0.920262	1.10535	0.97048	0.833328	0.946901	1.43716	1.28182	1.23409	0.90979	1.01985	1.16253	1.23915	1.3094	1.2159	1.00985	0.721552	0.836129	0.952315	1.0493	1.13113	1.01643	1.12122	0.988484	1.74435	0.977832	1.52746	0.978741	0.857898	1.64537	1.29902	0.999707	0.959675	1.07573	0.980044	0.91902	1.22135	1.21498	1.11965	1.25371	0.977806	1.12813	0.918933	1.16057	1.45223	1.6271	1.11473	1.04741
812	1.34425	1.10978	1.0181	0.91205	0.895542	0.987681	1.17562	1.06447	1.02392	0.864373	0.901255	1.1676	0.813373	0.950918	1.17294	0.9744	1.20383	1.0591	0.773052	1.0693	1.09085	1.44629	1.35694	1.18302	1.13548	1.06012	1.01541	1.12372	1.0236	0.99079	1.16669	1.29063	1.33797	0.936975	1.06204	1.05243	0.856659	0.819149	1.18623	1.28483	1.24649	1.01054	1.21111	1.09387	1.16	1.61983	1.9198	1.36765	1.17643
814	0.929423	0.768719	0.910074	0.628758	0.803928	0.863478	0.896843	0.963523	0.890881	0.687896	0.938044	0.816241	1.0508	0.733205	0.770885	0.792264	1.17915	0.910285	0.902397	1.02744	0.85565	0.65049	0.975754	0.949081	0.950075	1.02889	0.873549	0.943654	0.835433	0.830844	0.840847	0.817699	0.937287	1.06497	0.895611	0.825156	0.898082	0.798834	0.87844	0.867775	0.697891	1.07678	0.880613	1.06601	0.892725	1.09155	0.980502	0.816	1.04532
816	1.24609	1.14073	1.03675	0.940705	1.00566	1.09682	1.19104	1.00576	1.06624	0.913214	0.950521	1.21415	0.889602	0.905323	1.29154	0.993315	1.14283	1.12656	0.815122	1.15057	1.0858	1.59917	1.1766	1.04876	1.10615	0.930688	1.16087	1.06606	1.08493	1.01053	1.21061	1.31272	1.29515	1.0473	1.09137	1.14775	0.987868	0.888382	1.30209	1.2939	1.32742	0.940375	1.29409	1.11959	1.18633	1.42433	1.37659	1.48454	1.1917
817	0.661419	0.719338	0.725239	0.675637	0.944987	0.767783	0.916859	0.609796	1.25078	0.78407	0.971636	1.22123	0.907621	0.905868	1.05926	0.921226	0.734225	1.03139	1.10926	0.869884	0.967081	0.911568	0.932786	1.09473	1.1413	1.10457	1.00179	0.938632	0.943155	1.12901	1.03406	0.869753	0.628368	1.03793	1.03865	0.826161	0.983808	1.46593	0.915012	1.0067	0.888097	1.11854	1.08595	0.935785	0.901444	1.33945	1.0771	0.841231	0.701992
818	0.76918	0.759155	0.750486	1.26835	0.726595	1.1502	1.42349	1.4533	0.854511	1.20027	0.944334	1.015	1.09012	0.861617	1.18775	0.866728	1.62697	1.14571	1.6707	0.961023	0.83491	1.24456	1.86946	0.796847	0.868125	0.977641	1.12341	1.02677	1.34448	1.29953	1.05043	1.16898	0.870213	1.11284	0.759444	0.977189	0.931052	1.50909	1.02043	1.00658	0.865508	1.24297	1.58842	0.937398	0.746504	0.752477	1.01961	1.51722	0.810486
819	0.982638	0.939828	0.866777	0.85411	0.703858	0.784415	0.943906	0.879305	0.761016	0.698569	0.799716	0.859512	0.799048	0.909408	0.74124	0.800161	0.964135	0.910298	0.732323	0.836339	1.02034	1.61663	0.869815	0.829606	0.825686	0.925314	0.961605	0.810408	0.739251	0.876601	0.785663	0.869798	0.754181	0.790301	0.868166	0.847954	0.635065	0.632863	0.882962	0.905645	1.71734	0.806992	0.785423	0.837161	0.912169	0.986934	0.963861	0.911623	0.817331
820	0.808973	0.796612	6.66505	0.66712	0.724041	1.47988	0.908338	0.71246	0.552289	0.945359	0.783863	0.717648	0.481456	0.821139	0.705274	0.684591	0.951661	0.992621	3.86275	3.278	2.97081	0.580128	1.84144	0.752461	0.614897	0.802096	0.916782	0.622427	0.702664	1.44991	0.58428	0.652745	1.93252	0.930449	0.990961	0.694695	1.32938	1.47915	0.924254	0.7286	0.669024	0.658891	1.23677	0.699885	0.65053	0.739947	0.868688	0.669912	4.47687
821	0.948621	0.940772	0.877902	0.943013	0.871103	1.13287	0.917992	1.0532	0.850924	0.813437	0.899547	0.995364	1.10805	0.843486	0.996905	0.899422	1.17159	0.979334	0.88412	1.04502	0.938895	0.827075	1.91132	1.00532	0.970419	0.973005	1.01312	0.743785	0.773369	1.14902	0.874972	1.07083	0.977764	1.04516	0.872751	0.841504	0.773726	0.78336	1.0486	0.848985	0.825816	0.929608	0.923504	0.948855	0.92009	0.832284	0.882697	1.04601	0.921546
822	0.744535	0.857546	1.143	1.04015	0.820339	1.2915	0.893009	1.40802	0.801315	1.12485	1.01262	1.02148	1.25649	0.751834	1.10797	0.833688	1.53274	0.829984	0.681865	0.849095	0.840266	0.889225	2.00846	0.774119	0.672015	1.34666	1.31775	0.687595	0.851613	0.973338	0.850113	1.14977	0.953377	1.61265	0.730673	0.669584	1.14297	0.745816	1.00267	0.889304	0.739408	1.35317	1.21712	1.05162	0.755474	0.884686	0.870466	1.19273	0.789098
823	1.03709	1.13892	0.921895	0.83051	0.796674	1.00959	1.14548	0.821411	0.938656	0.830426	0.89054	1.01363	0.981719	0.868247	0.884086	0.830485	1.0392	1.07442	0.972512	0.987751	1.11224	0.919766	1.07377	0.944518	0.990087	0.882809	1.01449	0.868358	0.935527	0.934516	0.821683	0.890535	0.939091	0.980539	0.853284	0.957286	0.748222	0.888481	0.963181	0.938697	0.791012	0.896066	0.967945	0.837389	1.09157	0.849252	0.848715	0.938418	0.976043
825	0.810884	1.05912	1.03854	0.898881	0.914479	2.30647	1.42857	1.33754	1.00118	1.13796	0.903514	1.21033	1.60538	1.24753	1.42902	0.831023	2.05354	1.22204	1.05444	1.17207	1.05067	0.970725	1.98216	0.994298	1.06854	1.1349	1.03716	0.936913	1.03957	1.81812	0.84217	1.43654	2.01326	1.01087	1.03676	0.806804	1.0509	0.816776	0.97861	0.895167	2.57779	1.0285	1.16289	0.927713	0.966034	0.942721	1.24536	1.40279	1.052
826	0.9501	0.971345	0.87048	1.16988	1.16035	2.78352	1.07405	1.07043	0.968512	0.943959	0.941493	1.48131	1.19652	1.5801	1.12319	0.846799	0.881115	1.37553	1.06272	1.129	1.49894	0.979885	1.41426	0.869918	1.19594	1.07717	1.21088	0.868416	1.42367	1.46354	0.95944	0.716193	1.20315	1.15438	1.33131	1.15347	1.64673	0.92017	0.951686	0.914137	1.24763	0.805403	0.668847	0.927656	1.466	0.883509	2.06666	1.09854	0.994518
827	0.386427	0.94656	1.46398	0.738199	0.692175	1.07666	0.836447	0.767733	0.634988	1.12637	1.22176	0.933475	1.6098	1.13185	0.794686	0.992204	0.904053	0.796448	0.667202	0.745663	0.913911	0.902038	1.5159	0.627665	0.690221	1.93113	2.04785	0.509472	0.519778	0.910633	0.75469	0.790242	1.07161	1.89562	0.926024	0.987769	1.83174	0.71977	0.910809	1.0168	0.753821	1.36219	0.782969	1.07513	0.688308	0.70552	0.765315	0.922948	0.69858
831	0.508485	0.97279	1.20308	0.60138	0.618439	0.950129	0.66211	0.78897	0.550042	1.05655	1.08055	0.772623	1.39632	0.661237	1.02819	0.930165	0.840545	0.741543	0.654022	0.6998	0.627541	0.911356	1.41027	0.605299	0.60293	1.80798	1.51009	0.777743	0.618598	3.01223	0.695802	0.839531	4.14915	1.66285	0.797572	0.793987	1.72149	1.11195	0.973566	1.13148	2.41221	1.36878	0.663024	1.02382	0.583494	0.70631	0.653064	1.34542	0.8143
832	1.02097	1.60966	1.68727	1.06402	1.05062	0.810462	1.30346	0.721896	1.49475	1.30529	1.85816	1.46403	1.15767	0.811936	1.20037	1.11741	0.768597	1.07484	1.37179	1.14234	0.970462	0.881429	0.678979	0.563205	1.04763	1.01387	1.0319	0.924826	0.909118	2.813	0.881783	0.808687	1.32865	0.751707	1.45545	1.73769	1.07986	1.26406	0.918195	1.0599	1.07207	0.610343	0.762342	1.28238	1.12469	1.47553	0.9864	0.86833	0.619213
835	1.29086	1.14457	1.07883	1.14314	1.01782	0.975965	1.04704	1.03061	1.02199	1.0159	1.08123	1.30932	1.01151	0.832614	1.09982	1.09293	1.12918	0.969719	0.791632	1.14309	0.74089	1.07274	1.41286	0.913104	1.11578	1.16166	0.947384	1.03793	1.07466	2.05512	1.06659	1.36952	3.20757	1.05047	1.15757	0.989901	1.05927	0.995725	1.12732	1.04185	1.94237	0.906701	1.04157	1.01412	1.19487	1.03523	0.99179	1.104	1.13639
836	1.41235	2.29785	1.80706	1.88991	1.77937	1.68068	1.42776	1.37068	1.42863	1.74978	1.86693	2.09801	4.37425	1.49746	1.58808	1.16464	1.6524	1.76993	1.79226	1.5885	2.81203	1.63174	1.2797	1.24087	1.88925	1.7561	2.3919	1.56833	1.63992	3.4517	1.23382	1.62878	4.79348	1.49932	1.99739	2.47503	1.74969	1.68951	1.65208	1.18167	2.88764	1.60057	1.87815	1.5235	1.62188	1.60978	1.58576	1.93222	1.18911
839	0.533829	0.57362	0.790449	0.487295	0.797119	0.686158	0.769195	0.673715	1.05289	0.631108	0.913783	0.795526	0.900656	0.847953	0.879205	0.912496	0.689315	0.731755	0.686846	0.8351	0.719741	0.574143	0.833077	1.14793	1.13402	0.957279	0.740578	0.928208	0.674875	0.758574	0.913875	0.912336	0.804631	1.00611	0.782251	0.681318	0.955169	0.650748	0.804447	0.941704	0.68293	1.33291	1.05144	0.921281	0.762365	1.14135	0.970815	0.910786	0.76652
842	1.05969	1.12856	0.929838	1.09243	1.11843	1.1954	1.21139	0.971121	1.12124	0.963926	1.05894	1.21943	0.902841	0.893742	1.48837	1.01708	1.18823	1.13292	0.969387	1.19483	1.12561	1.52949	0.862386	1.13718	1.11946	0.924041	1.29121	0.985408	1.10324	0.89604	1.18006	1.30523	1.13269	1.07101	1.09217	1.18929	1.01303	1.05321	1.1297	1.34384	1.13624	1.22095	1.26877	1.10588	1.10421	1.15723	0.952233	1.56663	1.01885
845	0.625944	0.799746	0.957487	0.754832	0.75489	0.78063	0.968384	0.976456	0.889564	0.899997	0.870798	0.883013	0.965561	0.893039	0.94974	0.913395	0.882213	0.779165	0.82452	0.728646	0.745716	0.964376	1.04439	1.09022	0.938815	0.928683	0.829769	0.799196	0.824701	1.35926	0.755927	1.09109	0.827367	1.43935	0.834227	0.808104	0.776637	0.948563	1.00792	0.836564	0.715784	1.08501	0.889722	0.967037	0.723514	0.935732	0.959238	0.918515	1.09578
846	1.15974	1.07922	0.460106	1.56592	1.71606	0.524694	1.34789	1.54329	1.22905	1.14861	1.01698	0.797602	1.29127	0.948126	1.42304	1.16646	1.13177	0.678291	1.46539	1.87395	1.01095	1.74232	0.900681	1.15185	1.35775	0.98595	1.02475	1.16083	1.33102	0.709053	1.7206	1.38296	0.851761	0.737905	0.989752	1.2765	1.23099	1.06157	1.11489	1.2726	1.45831	1.29996	1.22142	0.965797	0.718513	0.830222	1.42673	1.80834	0.729555
849	1.18556	1.40607	1.04899	1.21482	1.31277	1.27794	1.32405	0.800458	1.11256	1.08941	1.22617	1.38727	0.915843	0.862736	1.40732	1.00293	1.06884	1.1906	1.09795	1.45347	1.15969	1.43659	1.19356	0.981988	1.32225	0.827344	1.34603	0.929756	1.11948	1.13984	1.1717	1.17959	1.30334	1.0841	1.27739	1.46273	1.08661	1.03389	1.3532	1.4232	1.27461	1.05853	1.58342	1.16806	1.2745	1.30939	1.17335	1.8413	1.23094
851	0.45472	0.7582	0.639773	0.733675	1.0282	0.847988	0.891568	0.575064	1.08205	0.694461	0.877372	1.09974	0.955079	0.816084	1.01514	0.932059	0.548049	0.803834	1.31128	1.08357	1.08951	0.892769	0.602582	0.839976	1.02575	1.07402	0.907953	0.878433	0.978913	1.13298	0.916988	0.833226	0.50464	0.993411	0.976003	0.922759	0.878041	1.39949	1.0412	0.98675	0.792973	0.9366	0.925773	0.917691	0.943174	1.48263	1.16601	0.792319	0.685111
852	0.542692	0.603546	0.742001	0.551161	0.918219	0.774574	0.637548	0.601743	1.03971	0.587309	0.913446	0.852605	0.874024	0.671358	0.825639	0.801645	0.606715	0.617243	0.66168	0.858578	0.819827	0.675755	0.599337	0.956121	0.916616	0.931753	0.727164	0.85197	0.670443	0.855566	0.819	0.750096	0.63577	1.00997	0.761773	0.684797	0.961688	0.768104	0.867256	0.871934	0.67194	1.02637	0.894183	0.948129	0.709965	1.24803	0.897007	0.678548	0.67656
854	0.741997	1.15259	1.3674	0.503317	0.19343	0.250239	0.861059	1.71205	1.19118	1.23957	1.02387	0.446133	0.180575	0.885548	0.552526	1.03457	1.61988	1.50327	0.552167	0.325807	0.175876	0.582663	1.46535	0.838846	0.876957	1.08458	1.10627	1.66154	0.274211	0.589473	2.56364	0.705752	1.07247	0.502236	1.08206	1.41242	0.615287	0.733429	0.293918	0.446701	0.528322	0.808869	1.04345	0.64664	0.424585	0.274658	1.01143	0.557021	1.74912
855	1.50341	1.26442	1.02287	1.13075	0.969754	1.0334	1.14398	1.07006	1.15001	1.01406	1.0431	1.30397	1.21158	0.73457	1.09932	1.00686	1.28097	1.16709	0.821233	1.04665	0.896615	1.47396	1.35195	1.19641	1.14664	1.30765	1.05077	1.14393	1.27444	1.053	1.12989	1.49376	1.30844	1.20003	1.10258	1.06084	1.07091	1.04186	1.4517	1.26259	1.0537	0.795354	0.969045	1.29742	1.30551	1.41291	2.18163	1.28299	1.23779
856	0.989516	1.37907	1.8523	0.635824	0.22743	0.261914	0.743158	2.14539	1.24014	1.42032	1.17561	0.5782	0.211474	0.988949	0.579719	1.03085	2.09053	1.05506	0.219599	0.275709	0.146747	0.646458	1.76251	0.943188	0.748736	1.28259	1.23154	1.71452	0.262363	0.356866	1.1415	0.742387	1.46138	0.588171	1.1339	1.22293	0.724867	0.554147	0.334073	0.533776	0.701545	1.02324	0.906556	0.779039	0.514619	0.330823	0.69842	0.461406	1.87706
858	0.750395	1.02764	0.796078	1.0653	1.18058	1.15586	1.16903	0.786509	1.01613	0.931431	1.00999	1.39096	1.23538	0.909733	1.31204	1.07673	0.754062	0.68743	0.997358	1.163	1.19528	1.46082	0.936828	0.946263	0.992941	0.927507	0.988767	0.790779	1.16943	0.862204	0.99542	1.36383	1.01675	0.881977	0.902394	1.05988	0.834408	0.922758	1.41958	1.22567	1.22297	0.740454	0.783057	0.801469	1.36554	1.25788	0.965881	1.20866	1.00364
859	1.48112	1.75149	2.116	0.851127	0.365188	0.423548	0.840991	2.3124	1.11103	1.58105	1.13429	0.730024	0.413711	1.24648	0.552719	1.23684	2.08652	0.632206	0.401367	0.399897	0.330611	0.753189	1.97196	0.969615	0.708868	1.66765	1.45202	1.61275	0.449922	0.331936	1.32956	0.91756	1.84764	0.721009	1.14928	1.37415	0.884346	0.517048	0.37881	0.547231	0.945815	1.30628	0.870131	0.822757	0.654276	0.424849	0.687914	0.414929	1.81008
860	1.31668	1.764	1.75623	0.859441	1.30297	1.43378	0.939794	0.731171	2.33477	1.54598	2.03953	1.35975	1.68704	0.775171	2.51044	1.57299	1.15103	1.86994	1.57874	2.05142	1.99497	1.41975	0.969545	1.11278	2.6178	1.38215	1.71815	1.36423	1.21249	2.29281	0.902477	2.33547	2.27692	1.42376	1.87575	2.66195	1.39493	1.13896	1.28733	1.13366	0.669675	1.15779	2.34114	1.8112	1.79001	5.16698	1.38261	2.82282	1.96058
861	0.791866	0.634599	0.795135	0.549191	0.782176	0.846895	0.787452	0.76286	0.900991	0.581255	0.968007	0.810861	0.81425	0.641421	0.886401	0.794452	0.751888	0.631327	0.553611	0.784892	0.77411	1.01612	0.903363	0.978178	0.853909	0.576073	0.623372	0.732053	0.698875	0.762512	0.755644	1.04575	1.07398	0.759896	0.522927	0.710708	0.815817	0.485971	1.02693	0.913726	1.04229	0.741729	0.731347	0.767386	0.798584	0.856576	0.661851	0.850132	1.05157
862	0.819774	1.18425	0.727925	0.563784	0.473622	0.711646	0.731405	1.58455	1.20856	1.25471	1.12215	0.645933	0.490377	0.987533	0.706164	1.28195	1.81846	2.38123	4.03558	2.30058	1.12728	0.712093	4.34221	0.892423	1.02609	1.24511	1.26511	1.75438	0.4922	1.07432	1.44558	0.824828	2.01835	0.76747	1.3078	1.26003	1.44124	2.46996	1.87882	0.602193	0.697595	0.933893	1.09084	0.803735	0.665555	0.775064	1.19762	0.678239	2.11255
864	0.690474	0.750709	0.758741	0.628721	0.739862	0.776942	0.828254	0.751601	0.90675	0.718798	0.911232	0.936087	0.884861	0.675857	0.821776	0.784137	0.792036	0.902781	1.03868	0.76549	0.71631	0.858072	0.819933	0.852889	0.86656	0.886914	0.933177	0.873541	0.785483	1.07283	0.886649	0.79966	0.867855	0.780476	0.9808	0.87075	0.729233	0.913867	0.924144	0.777448	0.802212	0.789396	0.764881	0.891075	0.899313	1.11201	0.662165	0.819393	0.74891
866	1.25386	1.23296	1.33692	1.18639	0.922946	0.699254	1.04257	1.58619	0.958447	1.31347	0.941465	1.12347	0.841278	2.7274	0.699235	1.13639	1.70991	1.16569	3.59736	2.29105	0.875419	0.894936	1.44037	1.21035	0.880916	1.39607	0.965194	1.4125	1.06366	0.801396	1.52794	1.02929	1.35653	1.34416	0.933329	1.96829	1.35819	2.24113	1.54793	0.737882	1.07325	1.06866	0.937059	0.912334	0.762272	0.822627	1.17276	0.864094	1.40345
868	0.70639	0.746761	0.730909	0.645982	0.790662	0.753924	0.752395	0.756557	0.922573	0.692919	0.906367	0.871528	0.853255	0.710005	0.802552	0.584659	0.822183	0.857336	0.948762	0.767598	0.792179	0.721035	0.585188	0.901737	0.907404	0.834978	0.73937	0.944345	0.834747	1.03549	0.758317	0.56633	0.846027	0.736844	0.912531	0.858883	0.638493	0.895315	0.691326	0.638909	0.794011	0.886356	0.803589	0.906007	0.79395	0.861105	0.645378	0.561015	0.739172
869	1.39682	1.55277	2.00658	0.938652	0.742874	0.559696	0.871453	1.88998	1.20304	1.38243	1.06191	0.892672	0.605868	1.31025	0.57139	1.29084	2.00656	0.582477	1.05074	0.796521	0.643037	0.813124	1.95949	1.0761	1.01509	1.72531	1.37852	1.49412	0.68854	0.6204	1.09567	0.923391	1.67121	0.918715	1.21073	1.15373	0.988031	0.682757	0.483646	0.704944	0.963938	1.90479	1.00875	0.848106	0.719794	0.831257	0.843733	0.46619	1.91485
870	1.2191	1.34739	1.06866	1.20293	1.05789	1.00572	1.21473	1.10009	1.02477	0.959865	1.1818	1.28099	0.883608	0.993002	1.31416	1.0872	1.23653	1.03436	0.886424	1.12896	1.28296	1.33008	1.18789	1.15373	1.05237	1.25294	1.02271	1.20157	1.22457	1.19605	1.23365	1.29423	1.99042	1.1777	1.01185	1.36113	1.09019	1.07691	1.15095	1.2291	1.06179	0.902173	1.33253	1.07631	1.16382	1.43918	1.95816	1.42298	0.972671
871	1.4202	1.2359	1.094	1.01769	1.03772	1.09104	1.17125	1.09679	1.11968	0.868422	1.16776	1.46618	0.959545	0.945449	1.25937	1.0345	1.24462	1.01136	0.894338	1.15872	1.06156	1.57172	1.28965	1.16153	1.06138	0.942343	0.99191	1.16167	1.35203	0.994933	1.17649	1.43172	1.26293	1.16384	1.04979	1.16236	1.07017	1.02146	1.45132	1.34355	1.42019	1.02383	1.31332	1.1722	1.2895	1.36268	2.0954	1.49105	1.40031
872	1.37462	1.6812	1.90248	0.920849	0.492568	0.85239	1.06507	2.59041	1.22999	1.99525	1.10444	0.877346	0.616172	1.77957	0.861734	1.5554	2.11811	1.30881	0.653863	0.60111	0.705935	0.832906	1.71851	1.0673	0.849876	1.55326	1.4184	1.65564	0.873984	0.406031	1.5586	0.870035	1.3827	0.986048	1.47115	1.52084	0.802842	0.711215	0.41885	0.616141	0.858827	1.11185	0.979624	0.95512	0.701555	0.496713	1.10219	0.606823	1.48382
874	0.756579	0.506232	0.719079	0.385987	0.556237	0.65708	0.761743	0.690021	0.738647	0.465869	0.860363	0.60706	0.652241	0.479231	0.702989	0.615652	0.710043	0.658299	0.48708	0.569872	0.588297	0.785048	0.853937	0.89044	0.708018	0.507832	0.573874	0.64731	0.509365	0.75646	0.63907	0.827323	0.94745	0.656716	0.450942	0.56124	0.742246	0.480645	0.825112	0.707546	0.855741	0.714406	0.679899	0.704231	0.557268	0.679321	0.507706	0.688462	0.98974
875	0.528566	0.481929	0.769704	0.453063	0.728807	0.724049	0.532792	0.591108	0.874339	0.476216	0.843865	0.725295	0.786963	0.607982	0.652949	0.639968	0.589848	0.518666	0.509888	0.692184	0.702593	0.524965	0.606719	0.940182	0.736348	0.828816	0.61408	0.752168	0.507816	0.746779	0.698004	0.646464	0.605721	1.00378	0.571976	0.552341	0.902255	0.545744	0.751401	0.71734	0.550885	1.02367	0.802432	0.854257	0.543821	0.964977	0.639606	0.565533	0.66196
878	0.950984	1.0789	0.894084	1.4771	1.01804	1.00136	1.07925	1.18623	0.924478	1.16968	0.979093	1.29771	1.23063	1.04315	1.03977	1.1737	0.929618	0.913259	1.17909	1.11392	0.78963	1.25843	1.14346	1.11205	0.882137	1.36803	1.1864	1.03207	1.38869	2.2452	1.2777	1.27006	2.00484	1.05757	1.043	0.962111	0.770593	1.10002	1.24921	1.03496	1.42832	1.04865	1.11698	1.1022	1.1389	1.37289	1.04786	1.06459	1.03415
879	1.22893	1.2684	1.00977	1.24073	1.25724	1.10431	1.30901	0.998263	1.11334	1.00699	1.1847	1.5156	0.909463	0.874696	1.49388	1.13871	1.1797	1.02494	0.922901	1.07734	1.05439	1.50106	0.999994	1.00734	1.14069	1.06596	1.11301	1.11722	1.28789	0.920912	1.22984	1.27165	1.18748	0.910842	1.09831	1.24774	1.09964	1.10326	1.2361	1.32243	1.20402	0.954778	1.26927	1.16744	1.18398	1.41916	1.23033	1.49686	1.10291
880	0.849367	1.08319	1.00694	0.928275	0.986999	1.04095	0.846619	0.950423	0.95743	1.05848	1.10512	1.12358	1.72755	0.920989	0.895839	0.929177	0.881133	0.91541	0.943264	1.00628	1.16758	0.999248	0.880422	1.05193	0.955008	1.34044	1.05187	1.0764	1.05051	3.81848	0.938561	0.964227	3.17476	1.07995	0.96258	0.983973	1.00287	0.864855	0.956323	0.93774	2.19702	1.0227	1.0878	1.20421	0.956352	1.2027	0.868943	0.985701	0.945193
881	1.41312	1.29511	1.04624	1.21511	1.28042	1.28709	1.37371	1.04899	1.05832	1.05674	1.14496	1.57513	1.027	0.898629	1.35179	1.04932	1.14288	1.07225	0.943743	1.30894	1.20286	1.62473	0.75327	1.08512	1.13349	1.09936	1.17976	1.14516	1.37864	1.04897	1.15842	1.3553	1.43734	1.14789	1.20648	1.28555	1.1175	1.01444	1.33711	1.41017	1.41272	0.914884	1.41225	1.19842	1.42997	2.11402	2.56889	1.58859	1.21318
882	0.96189	0.89034	0.877329	0.982036	0.866126	0.937648	0.900614	1.01148	0.896259	0.912142	0.96794	0.991467	1.06451	0.827103	0.922845	0.938377	0.987907	0.725503	0.911507	0.901956	0.707048	0.973695	1.25618	1.08342	0.833238	1.08413	0.925395	0.905791	1.02105	1.54003	1.02913	1.04855	1.39886	0.953483	0.775206	0.787295	0.780843	0.922909	1.1221	0.885799	1.13868	1.04198	1.00088	1.0137	0.89928	1.07541	0.799077	0.954768	0.989477
884	0.772324	0.899911	0.855481	0.634264	0.886611	0.926394	0.696648	0.791588	0.893575	0.776926	0.954132	0.904767	1.10016	0.74274	0.837873	0.70846	0.785754	0.757943	0.649896	0.880692	0.931915	0.643927	0.712943	0.844579	0.846581	1.15479	0.819266	0.958226	0.76807	0.776692	0.779219	0.773231	0.973643	0.896872	0.835065	0.786939	0.839993	0.591556	0.835786	0.823162	0.713015	0.878106	0.933111	1.13173	0.853027	1.10824	0.821985	0.826078	0.823844
885	0.700028	0.5783	0.804087	0.614953	0.577328	0.818412	0.999739	0.773569	0.784783	0.538081	0.643369	0.583771	0.861643	0.735236	1.08168	0.641275	1.11348	0.773787	0.906458	0.671319	0.756363	0.726587	0.971697	0.880425	0.741721	1.22818	0.555384	1.04097	0.788195	0.75387	1.02129	0.71186	0.617651	0.777724	0.599087	0.60636	0.654246	0.936094	0.854513	0.436708	0.736155	0.835978	0.753903	0.828451	0.688567	2.10208	1.18106	0.450337	0.769159
886	0.59489	0.628598	0.806656	0.485111	0.673556	0.818505	0.493863	0.72098	0.790884	0.567068	0.835065	0.788015	1.29962	0.654404	0.651248	0.757593	0.717756	0.518025	0.446941	0.642035	0.688893	0.529473	0.579017	1.13287	0.709431	1.07653	0.69102	0.714332	0.492989	0.730813	0.682902	0.613945	0.729872	1.07266	0.606728	0.552998	0.952531	0.616816	0.722735	0.629708	0.626616	1.17534	0.832014	0.800917	0.491771	0.876185	0.576615	0.561911	0.813451
888	1.32305	1.49592	1.3324	1.76064	1.3383	1.41766	0.989122	1.3431	1.28165	1.38391	1.23433	1.60357	4.77703	1.22178	1.03291	0.966437	1.25216	1.17977	1.93053	1.49454	2.05417	1.17436	1.03312	1.31207	1.2515	1.9545	1.61996	1.48978	1.49412	2.11399	1.107	1.20121	1.15551	1.39851	1.34143	1.1744	1.41213	1.10595	1.09414	0.947237	1.02032	1.62054	1.58932	1.321	1.33938	2.06539	1.23475	1.02599	1.16799
889	0.689801	0.838291	0.825654	0.680564	1.03359	0.868386	0.632848	0.746477	0.932295	0.749149	1.00088	0.965556	1.37527	0.886507	0.882149	0.771263	0.654955	0.635217	0.6126	0.815613	1.12502	0.726509	0.469868	0.892379	0.912519	1.13225	0.855173	1.00908	0.66419	0.836122	0.746789	0.474769	0.685474	0.976513	0.770206	0.751335	0.915579	0.464566	0.543767	0.761248	0.676209	0.897391	0.967663	1.07759	1.00447	1.11881	0.920895	0.699568	0.723235
890	1.31952	1.03686	1.01421	1.19357	0.971361	0.873916	1.18675	1.16995	1.2726	1.23311	0.95686	1.21814	1.12597	1.65098	1.24797	1.81789	1.0748	0.83875	0.923023	0.910178	0.886531	1.25531	1.27396	1.12352	1.1011	1.60651	1.2577	1.57498	0.971693	1.12266	1.49679	1.44159	1.08098	0.955209	1.20864	1.07724	1.11047	1.15041	1.05908	1.35529	2.17931	1.03785	1.00815	1.09937	1.37867	1.76169	1.81117	1.15435	1.11255
891	1.25153	1.28954	1.21691	1.1929	1.40843	1.29615	1.18066	0.942726	1.22897	1.33564	1.16769	1.76472	1.27558	0.929062	1.27915	0.793329	1.58602	1.03147	1.02062	1.41379	1.43441	1.39734	0.456304	1.01376	1.20181	1.59381	1.20181	1.34958	1.46399	1.20046	1.13754	1.03415	1.24026	1.12862	1.0308	1.24439	1.23843	0.744111	0.865867	1.34691	1.15867	1.03137	1.32998	1.08609	1.59613	4.41474	5.39995	1.46848	1.24818
892	0.525397	1.01747	1.28309	0.941391	0.654012	1.83321	1.23584	2.95092	2.21723	0.995313	0.878691	0.630876	1.37739	2.24676	1.4468	2.19303	3.84053	3.08725	2.05192	2.01754	1.86723	0.859118	1.11021	0.672229	1.33549	1.17142	0.806388	0.681616	2.60084	2.34422	1.27454	2.0791	4.1624	0.787737	0.808246	0.761792	1.94664	1.85499	1.09231	1.09454	1.01899	0.802929	2.20872	0.870041	0.883986	1.00853	2.48728	1.77999	1.40925
894	0.880132	0.77122	0.790858	0.669961	0.691595	0.632161	0.810873	0.75735	0.776207	0.66186	0.797902	0.664558	0.676249	0.873676	0.548061	0.81313	0.89363	1.10923	1.20382	0.834647	0.704373	0.615933	0.779862	0.827281	0.861886	0.729215	0.870714	0.739184	0.693749	0.74086	0.744752	0.775226	1.02197	0.864804	0.686019	0.76896	0.63556	0.761219	0.590395	0.716904	0.671178	0.776845	0.703691	0.80778	0.728863	0.55367	1.03966	0.618014	0.838945
897	1.29787	0.732271	1.26011	0.757709	0.818019	1.05711	1.26089	1.45205	0.971604	0.785878	0.852807	0.600108	0.708195	0.908293	1.01781	1.21267	2.01181	1.13718	3.3789	2.02697	0.872821	1.15634	1.58245	1.07287	0.762681	1.00128	0.722687	1.09691	0.710881	0.778161	1.14843	1.30056	1.08964	1.26212	0.689972	1.23387	0.913551	1.62897	2.03231	0.841051	1.11583	0.998113	0.927779	0.788912	0.711418	0.706023	1.31661	1.19199	0.760956
898	0.755509	1.20587	1.041	0.980784	1.24811	1.00899	0.940795	0.679479	1.60937	1.00138	1.13239	1.4873	2.13403	1.04302	1.18136	0.851342	0.861488	1.04497	2.89573	1.54181	2.06646	1.01153	0.801453	1.01989	1.73635	1.49604	1.31952	1.38017	1.31566	2.15671	0.826755	0.911079	0.840102	1.26728	1.46971	1.31806	1.64561	1.59369	1.1394	1.04779	0.859998	1.25771	1.53351	1.06805	1.23379	1.88591	1.34203	0.878241	1.08141
899	1.21556	1.06938	1.2832	1.3211	1.06653	1.01134	1.16947	1.16263	1.24431	1.09751	0.999344	1.05449	1.10104	1.46293	1.20073	1.26226	1.06347	0.850515	0.857015	0.961698	1.05821	1.06155	1.1432	1.11749	1.05225	1.47875	1.21627	1.44853	1.11376	1.31281	1.45223	1.27893	1.22016	1.0302	1.38805	1.11357	1.06476	1.04913	1.13692	1.11147	1.35363	1.16688	1.07294	0.944849	1.078	1.44456	1.54196	1.15375	1.20296
900	0.352183	0.48166	0.291882	0.398539	0.261262	0.435012	0.313068	0.249945	0.251525	0.270168	0.286824	0.318784	0.396866	0.365004	0.896758	0.378507	0.340702	0.291165	0.235837	0.325927	0.442069	0.422796	0.335693	0.295187	0.305699	3.37655	0.237934	1.83609	0.299421	0.398764	1.27678	0.310349	0.453645	0.237587	0.283681	0.355494	0.258303	1.52355	1.10096	0.376142	0.304578	0.266185	0.325543	0.293287	0.29437	10.9579	10.826	0.359514	0.460429
901	0.870202	0.821207	0.801047	0.747652	0.665798	0.6849	0.739627	0.985126	0.906563	0.831676	0.710777	0.896176	0.889995	0.945764	0.881865	0.812978	0.960302	0.749198	0.679554	0.694505	0.89569	0.699836	0.723778	0.896301	0.692545	2.03704	0.697173	1.33404	0.669411	0.833484	1.16237	0.782479	0.708487	0.614038	0.873333	0.755239	0.624699	1.20904	0.963941	0.669241	0.64186	0.614158	0.725525	0.770072	1.04775	3.34688	1.11783	0.644994	0.754363
902	1.20602	0.86262	0.962383	0.82284	0.702569	0.504778	1.06623	1.32514	1.04066	0.866628	0.709655	0.971554	0.968793	1.0378	0.768771	1.00568	1.06928	0.814463	0.732204	0.798792	0.828825	0.776609	0.818181	1.08597	0.716058	1.07921	0.688755	0.996508	0.728648	0.994858	0.933073	1.00851	0.911791	0.662285	0.834898	0.701541	0.723203	0.703718	0.686727	0.846887	0.94116	0.671254	0.881284	0.979732	1.08086	1.64146	1.35616	0.919076	0.791913
904	0.587378	0.667469	0.487612	0.53106	0.566687	0.597383	0.555522	0.413908	0.432529	0.435638	0.488276	0.645779	0.767336	0.499454	1.04113	0.571079	0.566716	0.433341	0.447104	0.555658	0.797281	0.402175	0.583225	0.473132	0.461786	3.03077	0.44255	1.83378	0.545942	0.69086	1.18815	0.592224	0.729345	0.457813	0.472447	0.58533	0.449187	1.30972	0.980582	0.633663	0.493643	0.436991	0.534029	0.540228	0.589009	10.362	11.3244	0.710162	0.600522
905	0.800487	1.35024	1.26409	1.15701	1.37653	1.15709	1.17854	0.683646	1.45351	1.14009	1.26003	1.65045	2.40316	1.15174	1.2324	1.01128	0.714551	1.511	1.51535	1.33268	2.07585	1.55502	1.49646	0.975519	1.81789	1.51264	1.50827	1.42783	1.34964	2.06165	1.23583	1.15273	0.750172	1.46333	1.88138	2.15166	1.34086	1.7802	1.79429	1.11499	1.38063	1.17564	1.73242	1.1159	1.20079	2.17265	1.45929	1.26264	0.944264
910	0.898559	1.04195	0.963935	0.976361	0.9313	0.9145	1.03764	1.09601	1.08217	1.15487	0.911965	1.27725	1.3958	1.12761	1.07439	1.09843	1.11989	0.799653	1.02714	0.937464	1.21599	0.940774	0.908096	1.04058	0.877862	1.20434	0.98578	1.01893	0.951307	1.18669	1.02099	1.09287	0.774068	0.739148	1.10537	1.00658	0.803791	0.975695	0.832752	0.883801	0.924572	0.686445	0.885615	0.973422	1.67027	0.924457	1.04307	1.01776	0.814005
911	1.1209	1.13545	1.13685	1.18462	1.07856	1.03123	1.13744	1.08045	1.16885	1.23871	0.997766	1.11722	1.11588	1.28486	1.16224	1.30903	1.04269	0.922786	0.991306	1.04105	1.02773	1.09889	1.06159	1.05466	1.02068	1.48263	1.1367	1.2679	1.01335	1.18411	1.2956	1.24163	1.36479	1.05115	1.12393	1.05385	1.22289	1.12337	1.255	1.18551	1.43905	1.08713	1.10572	0.961694	1.13921	1.21875	1.21457	1.2278	1.10961
913	1.70146	2.30942	1.90326	2.40174	2.0332	1.58643	1.09988	1.44381	1.93622	2.60376	1.71294	2.69074	6.04349	1.95129	2.06209	1.44547	1.92985	1.30241	1.78252	1.96643	3.8086	1.25446	1.03841	1.24825	2.26656	3.72716	2.23694	3.06916	2.0435	2.32615	1.88122	1.37622	1.27758	1.21437	3.0812	2.24743	1.70671	1.89902	1.7491	1.07909	1.35986	1.27059	2.25829	1.80749	3.32724	9.51967	4.52237	0.888477	1.1813
916	0.669646	1.06402	1.67391	0.584983	0.841169	1.23999	1.0933	0.896027	0.921738	1.37119	1.67519	1.34991	2.04696	0.766342	1.0421	1.12574	1.44199	1.06323	0.700812	0.9176	0.767806	1.49444	1.89305	1.17773	0.97646	2.08686	2.4342	0.540626	0.634686	0.973207	0.913875	1.33798	1.50728	2.4865	1.07878	0.923378	2.02458	0.753413	1.53888	1.41621	1.13979	1.27827	1.06373	1.28071	0.837007	0.831364	0.418145	1.49267	1.31907
918	1.06224	1.13899	1.05014	1.05192	1.11315	1.04166	1.16498	0.807275	0.960386	1.15197	1.12638	1.21365	1.16361	1.03099	1.23908	1.21832	1.01602	0.789649	0.815006	1.01878	1.02617	1.30711	1.11073	0.942101	1.0001	1.36616	1.05171	1.1905	1.0388	1.96102	1.24396	1.30038	1.87554	0.922973	1.09135	1.1298	1.10795	1.04328	1.19311	1.31625	1.75637	0.882768	1.03866	1.05258	1.06552	1.29374	0.864547	1.28959	1.05238
919	1.18805	1.2265	1.25322	1.31701	1.37564	1.35835	1.19345	1.03966	1.35909	1.36046	1.2621	1.38546	1.24134	1.44639	1.362	1.66308	1.20769	0.984137	0.95937	1.0461	1.13665	0.992801	1.09936	1.12205	1.1999	1.41147	1.09789	1.31451	1.10985	1.45407	1.30761	1.20344	1.46222	1.22033	1.1312	1.21438	1.23492	1.27515	1.07381	1.15817	1.60852	1.28359	1.13801	1.02098	1.24834	1.0832	1.01773	1.18373	1.17227
920	0.684848	0.954322	1.54499	0.536237	0.715707	1.0455	0.806311	0.95355	0.950445	1.07042	1.43601	1.09862	1.66664	0.792548	0.782839	1.00537	1.33398	0.969041	0.674054	0.783202	0.826577	1.05821	1.68027	1.22945	0.898565	2.31314	2.01945	0.772576	0.595753	0.755835	0.875561	1.12278	1.39149	2.3242	1.08424	0.779601	1.85515	0.702974	1.2979	1.148	0.90204	1.16149	1.01168	1.2542	0.741793	0.769053	0.466485	1.10264	1.22126
923	1.10767	1.35732	1.58745	1.57426	1.85816	1.24019	0.969741	2.2474	1.38104	1.23152	0.961615	1.17732	2.32868	2.68159	1.06487	0.953115	1.14206	1.93602	3.60396	1.86411	1.30465	0.950554	1.34483	1.13308	1.36464	2.10967	3.40658	1.60649	0.870034	1.35674	0.764684	0.75239	2.07796	2.30588	3.30871	1.5741	1.34684	1.48623	1.19636	0.605256	1.02854	1.98554	0.796216	1.50291	1.00054	0.888964	1.62913	1.03711	0.883271
927	0.854014	1.06158	1.03909	1.12786	1.18059	1.15612	1.30576	0.975601	1.13706	1.1478	0.947882	1.17177	0.99983	1.1665	1.29049	1.16718	0.923718	1.07755	1.12369	0.99074	1.11099	1.25993	0.986393	1.00049	0.981219	1.0428	1.13656	0.887699	1.12882	1.06217	1.18843	1.16115	0.821099	1.00661	1.09006	1.30528	1.11553	1.14396	1.11428	1.23021	1.12401	0.997075	1.12925	1.00715	1.19211	1.0991	1.11031	0.763769	0.947267
928	1.01976	1.1416	1.06271	1.05714	1.15006	1.16179	1.22239	0.813914	1.02625	1.07002	1.2288	1.23747	1.35803	0.990565	1.23686	1.26205	0.990769	0.880138	0.966533	1.12447	1.1319	1.33937	1.1821	1.03683	1.11644	1.11563	1.19044	1.12244	1.07489	2.42233	1.17614	1.36374	2.23568	1.01475	1.11364	1.15838	1.23355	0.995427	1.30575	1.27974	1.86018	0.987379	1.13904	1.1355	1.01817	1.16107	0.787262	1.389	1.14811
929	0.855667	1.21232	0.98484	0.874762	1.0301	1.07462	1.19403	1.12921	1.23863	0.926535	1.13044	0.600595	1.02078	1.2017	1.00319	1.14601	1.06072	0.791752	0.954951	1.00777	0.939665	1.44319	1.40815	1.38143	1.23586	1.40418	1.08197	1.27823	0.962015	0.57226	1.4519	1.34344	1.06687	1.12784	1.18463	1.00834	0.983498	0.940291	1.37935	1.12756	1.23413	1.28061	1.1128	1.13007	1.01584	0.629487	1.06545	1.00297	1.07349
930	0.852228	1.2565	1.1244	1.04545	1.13418	1.1712	1.27707	1.03401	1.31402	1.0655	1.14452	0.7333	1.03877	1.17909	1.10347	1.26815	1.01685	0.873812	1.08167	1.14709	0.94206	1.49054	1.36562	1.5563	1.36176	1.22474	1.23013	1.30176	1.05122	0.893345	1.46113	1.4432	0.933744	1.10114	1.33564	1.08517	1.06605	1.05097	1.38353	1.19597	1.27117	1.29839	1.15121	1.11513	1.1704	0.749026	0.990963	1.08002	1.05365
931	0.136986	0.404048	0.109239	0.276814	0.106745	0.116272	0.0992701	0.0978295	0.119127	0.10528	0.0985419	0.103388	0.231364	0.362785	0.733373	0.294965	0.105206	0.11121	0.131774	0.250347	0.385549	0.225626	0.191556	0.115426	0.121857	4.87994	0.121272	2.88158	0.110369	0.140428	1.65828	0.170284	0.124997	0.128974	0.165547	0.184382	0.0971125	2.24094	1.63577	0.14997	0.119185	0.139911	0.109767	0.132958	0.124382	11.634	11.3614	0.179926	0.332246
935	1.13068	1.13786	1.07821	1.09208	1.009	0.987578	1.13478	1.0005	0.999887	1.17818	0.989456	1.09652	1.04923	1.08394	1.15307	1.22655	0.979007	0.886452	0.865116	1.07351	1.12182	1.14173	1.05997	0.984693	0.981712	1.50955	1.27771	1.17705	1.018	1.56321	1.23067	1.39456	1.60339	0.961092	1.2042	0.975464	1.03264	1.02026	1.22421	1.20181	1.40588	0.874762	1.1464	0.987191	1.0719	1.41349	1.19962	1.21816	1.07117
936	0.163637	0.392595	0.185587	0.216658	0.128007	0.20632	0.17342	0.237449	0.185218	0.184833	0.132873	0.128818	0.180715	0.295311	0.775998	0.463271	0.186576	0.186149	0.134667	0.24069	0.335666	0.297909	0.335161	0.162415	0.149318	3.82173	0.142159	2.36663	0.125627	0.149397	1.32873	0.425166	0.14673	0.172428	0.164376	0.200362	0.163579	1.98373	1.20245	0.2195	0.151116	0.179035	0.179757	0.212742	0.135705	11.8504	8.06326	0.307871	0.353379
937	0.849438	1.04598	0.647703	1.55611	1.00348	0.94926	1.00197	1.1688	0.822819	1.01472	0.898924	1.39023	1.329	1.13267	0.94586	1.07943	1.0165	0.810012	1.54711	1.07962	0.888438	0.820444	0.957809	0.991597	0.814681	1.25026	1.13665	0.903481	1.53274	0.982563	1.13396	0.907364	0.806557	1.07612	0.93112	1.0046	0.774828	1.02778	1.04024	0.967096	0.781079	1.21356	1.15398	1.07895	1.16166	1.1806	0.896574	0.928302	0.870515
938	1.05972	1.22118	1.1382	1.13332	1.36221	1.32477	1.30998	0.771888	1.08038	1.22546	1.4804	1.43118	1.71637	1.03439	1.24958	1.30811	1.07997	0.945937	1.05007	1.2088	1.33779	1.36118	1.18276	1.05998	1.25839	1.04043	1.32225	1.0862	1.13692	2.49655	1.12885	1.30463	2.16911	1.09855	1.11237	1.24763	1.33187	1.05898	1.28459	1.33276	1.91475	1.1101	1.19863	1.19577	1.07136	0.9974	0.655804	1.4606	1.21453
939	0.676698	0.763756	1.14781	1.42868	1.05282	0.846334	0.993447	0.767535	0.626094	1.80725	0.827639	0.912837	0.887424	1.21604	1.52808	0.623725	0.595612	0.78246	1.27914	0.956736	0.704756	0.899246	0.895491	0.788491	0.794262	0.764406	2.22333	0.568647	0.786169	1.07427	0.668249	0.440804	1.09977	0.765917	1.78471	1.43181	0.743165	1.40091	0.860975	0.741694	1.31561	0.61972	0.834794	0.800749	0.619248	0.583925	0.909941	0.786821	0.5963
940	0.885528	0.949077	1.00714	0.868532	0.955242	0.939421	1.00824	1.30807	0.864524	0.869212	0.895748	1.01814	1.01577	0.950574	0.841269	0.923323	1.0314	1.00578	0.894991	0.995483	1.08185	1.04513	0.957487	1.11213	0.979494	1.14361	0.91773	1.03183	0.862413	0.566107	0.773547	0.777816	1.01695	1.00818	1.00135	0.914768	1.24837	0.793253	0.972223	0.887605	0.93497	1.29311	1.09247	1.06632	0.731761	1.08566	0.998804	1.11247	1.08296
942	0.105394	0.42417	0.104866	0.296697	0.108217	0.105605	0.112864	0.142441	0.104654	0.0978164	0.0919207	0.093388	0.098892	0.428596	0.632885	0.302105	0.116219	0.141644	0.108915	0.286518	0.446902	0.271103	0.255243	0.195924	0.100046	5.31996	0.108939	3.27708	0.128941	0.295022	1.9134	0.141722	0.22423	0.153784	0.134444	0.190325	0.10777	2.64597	2.06162	0.161976	0.262775	0.180833	0.111185	0.116253	0.0971003	12.7871	9.59776	0.14535	0.393976
946	0.846487	1.34632	1.15085	1.14751	1.31791	1.28517	1.39697	1.00681	1.29929	1.26602	1.374	0.747233	1.11387	1.19796	1.13444	1.34239	1.0922	0.986926	1.31254	1.24464	0.989764	1.57301	1.12365	1.38618	1.38289	1.25131	1.54136	1.15419	1.25927	2.14453	1.40495	1.30529	0.906611	1.12239	1.39842	1.28441	1.09118	1.16352	1.47903	1.31193	1.50339	1.3773	1.23642	1.27611	1.26586	0.633113	0.784911	1.09461	1.02749
947	0.940048	0.908471	0.75233	0.986947	1.05653	1.2117	0.918123	0.823563	0.900786	0.782791	0.800926	1.2087	1.25035	0.93628	1.08793	1.04633	1.04131	1.01355	0.916578	1.14443	1.22765	0.938682	0.861382	0.812897	0.874986	1.0351	0.898945	0.655684	1.02115	6.47752	1.11939	1.01535	0.878107	0.990529	0.911635	0.935292	0.992537	0.998337	1.20268	0.976021	0.990521	0.987466	0.878534	0.858335	1.02714	0.951114	1.21905	1.19749	1.14236
948	0.713319	1.28964	1.29998	1.01815	0.990699	1.11959	1.38585	0.82872	1.12886	1.10333	1.17102	1.17562	1.06197	1.42421	1.22116	1.35047	1.12545	1.10997	1.35286	1.21599	0.966644	1.77577	1.36478	1.47201	1.17549	1.32503	1.40869	0.942408	1.15661	1.1517	1.64315	1.51249	0.974574	1.3821	1.18259	1.16453	1.63488	1.16507	1.59829	1.17167	1.71207	1.25423	1.15656	1.30975	1.06603	0.849656	1.19624	1.06357	1.24568
951	0.592298	0.965268	1.02703	0.559291	0.832925	1.12073	0.844423	1.68962	1.10684	1.0411	0.899265	0.74788	1.11444	0.781951	0.869524	0.685076	1.15185	0.880641	0.751493	1.11384	1.16086	0.778845	1.11029	0.960253	0.996069	1.32353	0.888986	1.29065	0.622648	0.470099	0.940807	1.01197	0.784431	1.03487	0.754424	0.788218	1.31349	0.754299	0.939262	0.937753	0.69242	1.81438	1.39615	1.12685	0.464879	0.881414	1.1766	0.918061	1.30047
952	0.603277	0.892027	0.934901	0.629732	0.799483	1.06946	1.09508	1.26274	0.948735	1.23956	0.725825	0.739916	0.807611	0.712926	0.824878	0.751051	0.936252	1.0648	1.12616	1.12183	1.12733	0.924844	0.992774	0.843987	0.834604	1.00733	0.871057	0.994304	0.606309	1.02276	0.912675	0.723933	0.852408	1.04746	0.843181	0.659658	1.29857	1.35201	0.773668	0.846342	0.741064	1.2251	1.2177	0.954498	0.620894	0.986274	1.09572	0.930453	0.908175
955	1.00308	1.43216	1.2704	1.31549	1.25863	1.22838	1.45322	1.18756	1.43688	1.4403	1.24212	0.849445	1.08877	1.42849	1.0705	1.46133	1.14267	1.55456	1.44273	1.37797	1.07703	1.87061	1.47236	1.01047	1.29733	1.49484	1.40587	1.1604	1.36761	1.05838	1.72295	1.43947	1.08091	1.46573	1.49419	1.3294	2.63388	1.23195	1.87946	1.45269	1.77103	1.569	1.41071	1.34373	1.35499	0.702351	1.01292	1.198	1.31241
956	0.829048	1.36405	1.24996	1.19663	1.32463	1.53595	1.31029	1.07699	0.979006	1.27196	0.909724	1.63572	1.21436	1.20761	1.01279	1.17669	1.13868	1.36449	1.40815	1.26267	1.28672	1.48039	0.896395	0.988836	1.09537	1.14464	1.65366	0.785487	1.10708	0.864235	1.05061	0.872839	1.15635	1.46002	1.59579	1.87338	5.12876	1.82613	1.45854	1.07204	1.74206	1.19107	1.1782	1.19141	1.23613	1.14825	1.06546	0.983843	1.06533
959	1.18003	1.37351	1.2739	1.23045	1.7444	1.5461	1.45398	0.814269	1.13344	1.35385	1.79456	1.75508	3.01988	1.05847	1.3948	1.36002	1.13091	1.11612	1.2745	1.26958	2.02282	1.33497	1.29608	1.07979	1.53456	1.0504	1.55581	1.21636	1.24056	1.76322	1.12085	1.27915	1.86307	1.27801	1.21296	1.38179	1.84247	1.09005	1.26426	1.22569	1.45849	1.20595	1.28685	1.35154	1.07379	0.940157	0.750746	1.44906	1.18503
962	0.749182	0.763368	0.825817	0.439947	0.521632	0.721197	0.826203	1.40734	1.12642	0.561973	0.799576	0.316361	0.588469	0.825286	0.731241	0.801835	0.948571	0.680768	0.658531	0.623569	0.656732	0.892856	1.20951	1.81092	1.01526	1.05142	0.671809	1.35882	0.498732	0.717353	1.1298	1.08097	0.907735	0.879348	0.7422	0.565755	0.763528	0.565704	0.80523	0.702191	0.821652	1.16254	0.922277	0.90299	0.587019	0.534099	1.06147	0.613324	1.06556
963	0.745531	0.940081	0.890246	0.603817	0.704208	0.856455	0.960583	1.44427	1.23811	0.741195	0.853076	0.442974	0.773727	1.02862	0.876138	1.01857	0.938149	0.729204	0.82866	0.860689	0.841507	1.11142	1.15295	1.73259	1.22704	1.33464	0.840031	1.44693	0.700371	0.725353	1.2824	1.21163	0.814236	0.901697	0.986602	0.753816	0.806075	0.71731	1.00488	0.877264	0.936298	1.16934	0.981226	0.973013	0.812002	0.565043	1.31049	0.779412	0.977001
964	0.213409	0.489471	0.191842	0.369426	0.190269	0.275819	0.325368	0.323231	0.229291	0.200718	0.218397	0.178592	0.213172	0.495026	0.548302	0.391804	0.385543	0.255427	0.209478	0.41473	0.583593	0.421193	0.449475	0.536049	0.221656	5.32034	0.261558	3.32204	0.215379	0.364922	1.90313	0.32319	0.353122	0.346107	0.197346	0.257132	0.228581	2.71636	2.3424	0.29833	0.273125	0.394008	0.253183	0.193785	0.164054	10.7278	6.97957	0.249537	0.580885
966	1.12847	0.718725	0.814113	0.317619	0.340007	0.457954	0.745619	2.1303	1.33667	0.413522	0.736441	0.255361	0.537587	0.763844	0.777374	0.762352	1.04287	0.592261	0.512946	0.561673	0.565066	0.708335	1.11147	2.83335	1.38296	2.14057	0.466051	1.99523	0.338241	1.16081	1.64142	0.850722	1.19754	0.895836	0.64548	0.444946	0.680136	0.819052	0.695682	0.670402	0.705732	1.25035	0.835297	0.724284	0.604239	3.54653	3.01233	0.598392	1.41172
969	0.885176	1.01686	0.999586	0.701778	0.830142	0.957322	0.951305	1.18386	1.17905	0.796375	1.00035	0.457207	0.856441	1.00868	0.833746	0.986964	0.979467	0.778694	0.850268	0.870641	0.847731	1.15309	1.15616	1.49506	1.15093	1.20771	0.928084	1.41791	0.78137	0.624187	1.16314	1.13599	0.866807	0.969004	0.95099	0.810014	0.940557	0.70703	1.00817	0.964151	0.934591	1.20551	1.05043	1.08453	0.851346	0.58233	0.946634	0.776812	1.03507
971	1.36386	1.1072	1.26903	1.22803	1.07466	1.73337	1.25723	1.06413	1.0048	0.967141	1.25751	1.34709	1.31386	1.44622	1.24441	1.30425	0.982436	1.43782	1.16056	1.16039	1.23764	1.3676	1.14971	1.63388	1.82035	1.017	1.19527	0.944327	1.21917	1.12553	1.18809	1.25987	1.50474	1.5464	1.1093	1.21637	1.13046	1.10385	1.46101	1.3449	1.14231	1.33084	1.352	1.38011	1.20583	1.4518	1.91156	1.38526	1.1934
974	0.998755	1.70771	1.27012	1.30328	1.2315	1.28695	1.32533	1.66707	1.37444	1.63693	1.3832	0.906678	1.28446	1.28568	1.53183	1.23646	1.12628	1.17683	1.4101	1.27154	1.1189	1.47138	1.28311	1.37313	1.42585	2.90197	1.10601	1.28152	1.08264	1.7524	1.22169	1.37766	3.20875	1.20811	1.18192	1.16573	1.07543	1.8723	1.74254	1.30882	1.64651	1.33435	1.51141	1.24939	1.37645	1.0699	1.07143	1.36006	1.23777
975	1.04292	1.00569	1.2585	1.03417	0.930003	1.42984	1.29932	1.45912	0.966265	1.43735	1.06157	0.98863	0.839735	0.927384	1.43331	1.10143	1.38782	1.16032	1.116	1.40497	1.38435	2.14105	1.77234	1.08503	0.794657	0.887285	0.961549	0.832544	0.698656	1.11601	1.23352	1.4558	1.04234	1.04659	0.821787	0.850423	1.25738	1.2066	1.42143	1.36055	1.98008	1.27187	1.2773	1.00338	0.737795	1.14422	1.20987	1.82148	1.08898
976	0.570462	0.852079	1.04593	0.553191	0.637093	1.00212	0.880423	1.59256	0.762917	1.27753	0.605782	0.481576	0.512282	0.527806	0.762794	0.519905	1.04783	1.05165	0.80174	0.880789	0.883846	0.837895	1.07192	0.724143	0.566883	0.962458	0.708509	0.796771	0.456643	0.715075	0.708769	0.695859	0.90999	0.958247	0.688273	0.466715	0.915148	0.768983	0.638046	0.778	0.760644	1.03209	1.05619	0.910358	0.42413	0.592277	3.52996	0.86998	0.776702
977	0.983361	0.798386	1.7422	1.38617	0.938178	0.919373	1.2021	1.00003	1.4596	0.844425	0.836333	0.760852	0.826194	1.18313	0.873537	1.12697	0.853289	1.49045	2.50355	2.51984	1.90034	0.770649	0.693649	0.973286	1.93309	1.03138	0.641459	1.03723	1.43518	2.19728	0.859388	1.09618	2.44569	0.99147	0.761724	0.722524	3.066	1.88315	1.87364	1.1029	1.08106	1.01981	2.15976	0.889758	0.812173	1.08114	2.17943	0.7029	1.65148
978	0.496525	0.851179	0.889478	0.618228	0.808091	1.08476	0.728447	1.80797	0.964527	1.08213	0.740779	0.778591	0.690355	0.594716	0.841484	0.633342	0.853372	1.12101	0.623422	0.720354	1.15415	0.635508	0.888598	0.74508	0.483129	0.960582	0.527016	0.691002	0.42924	0.809205	0.780174	0.742969	0.871098	1.05785	0.753463	0.559057	0.632342	0.690886	0.727443	0.653344	0.705486	0.946371	0.742235	1.188	0.684793	0.843726	1.60787	0.850048	0.725455
980	1.20269	1.08697	1.09424	1.4298	1.3855	1.60226	1.54147	1.08721	1.1746	1.27521	1.37575	1.61846	1.31024	1.45395	1.3922	1.39854	1.0712	0.891881	1.81379	1.26806	1.15205	1.29697	1.28956	1.36368	1.13494	1.13339	1.08436	0.957182	1.30924	1.44208	1.1738	1.45297	1.28792	1.25167	1.18276	1.13629	1.33634	1.41481	1.36777	1.67031	1.38521	1.5422	1.07533	0.953895	1.35308	1.69441	1.56851	1.82788	1.16428
981	0.77784	1.11144	0.93479	0.813111	0.90587	0.975237	1.07225	1.04872	1.27662	0.937	0.99949	0.512321	0.929424	1.10744	0.904831	1.09549	0.975925	0.804237	0.98946	1.00176	0.936411	1.15851	1.17402	1.47642	1.28957	1.16526	1.03266	1.20426	0.907535	0.551782	1.13538	1.20492	0.911814	1.08553	1.12557	0.953985	0.792282	0.919451	1.15439	1.02237	1.14885	1.25762	1.08314	1.09994	0.97926	0.58066	1.02201	0.834973	0.86586
982	1.14868	1.08352	0.815977	0.890284	1.01767	1.13078	1.45246	1.10148	0.939661	0.901067	1.06721	1.21677	1.00982	1.06208	1.63073	1.15529	0.995606	1.16956	1.0724	1.22821	1.16657	1.73002	1.29619	0.962369	1.11785	0.847088	1.08658	0.866362	1.14193	1.0891	1.19324	1.49608	1.06321	1.06934	1.04532	1.09115	1.03017	1.24404	1.50175	1.4598	1.60543	1.00086	1.14596	1.09577	1.14391	1.29537	1.43868	1.52512	1.17181
983	0.660404	0.631379	1.03194	0.53073	0.500444	0.849952	0.715107	1.65101	0.635551	0.810754	0.593239	0.328977	0.595505	0.344406	0.612281	0.547819	0.891959	1.20275	0.745854	0.564077	0.737538	0.524548	0.875208	0.900305	0.396438	0.846678	0.525779	0.752907	0.354953	0.4829	0.671412	0.571936	0.779882	0.993217	0.504314	0.407181	0.935723	0.656309	0.531571	0.585817	0.737624	1.2765	0.981291	0.829653	0.39156	0.470386	0.804046	0.680549	0.948453
984	0.805138	0.762575	0.911131	0.500782	0.600001	0.789924	0.866439	1.32132	1.09801	0.626165	0.881654	0.362068	0.695431	0.844639	0.734326	0.824345	0.991291	0.75034	0.686222	0.698634	0.707639	0.854694	1.15691	1.60234	1.00818	0.981847	0.772676	1.18059	0.543095	0.67837	0.97381	1.00958	0.800701	0.900953	0.748169	0.648362	0.827251	0.572134	0.838946	0.771197	0.769648	1.18474	0.94167	0.960215	0.643801	0.472956	0.907499	0.613722	1.00137
986	0.950969	1.36966	1.08919	1.18814	1.20035	1.27112	1.31797	0.974736	1.22684	0.967861	1.30816	0.855186	1.11321	0.967338	0.939256	1.08043	1.07942	0.987937	1.24675	1.26233	1.08486	1.4157	1.12361	1.17999	1.41872	0.890104	1.40266	1.22396	1.30813	0.989094	1.15816	1.2715	1.00737	1.11685	1.17474	1.2383	0.965928	1.01981	1.35094	1.25771	1.22951	1.22797	1.35009	1.31488	1.25764	0.641039	0.852366	0.966222	1.06119
990	0.615791	0.772178	0.916571	0.507183	0.633488	0.92645	0.782392	1.49375	0.671368	1.14329	0.57404	0.501359	0.477067	0.48974	0.728443	0.468361	1.03483	0.906773	0.669368	0.811386	0.898379	0.814213	1.11145	0.794513	0.579923	0.800432	0.644603	0.697022	0.415365	0.539169	0.686214	0.701589	0.773202	0.876405	0.615908	0.446428	0.803082	0.748136	0.570034	0.696109	0.716713	0.914745	0.96106	0.885189	0.428546	0.544	1.16464	0.790352	0.823716
991	1.38486	1.50612	1.6525	1.0095	0.63635	0.736601	1.55101	0.910985	1.45401	1.34963	1.34686	0.778067	1.15005	1.12613	1.1811	1.10684	0.950412	1.40167	1.13673	0.788903	0.740884	0.870038	0.71022	0.705922	0.918065	1.52558	0.966385	1.01715	0.690946	4.45854	0.957993	1.01758	3.06326	0.715792	1.24268	1.2574	0.902762	1.09451	0.918852	1.11575	1.82506	0.510369	0.652472	1.26714	0.720316	1.62035	1.82919	0.709382	0.73998
993	1.14481	1.55979	1.2182	1.75321	1.35769	1.19894	1.33129	0.991664	1.13	1.57417	1.42179	0.809798	1.64064	1.07988	0.837321	1.29182	1.14198	0.905154	1.20273	1.43974	1.23408	1.58984	1.01295	1.16544	1.40873	1.42154	1.71816	1.18232	1.5106	1.15675	1.21786	1.42897	1.12342	1.30499	1.54146	1.46652	1.1194	1.16059	1.38045	1.46406	1.32092	1.41143	1.40278	1.29204	1.47197	0.730152	0.734463	1.16908	1.05442
994	1.13328	0.951385	1.53372	1.22411	0.969412	0.846678	0.924586	0.954062	1.19617	0.940178	0.917415	0.83481	1.26127	1.34762	0.72639	0.988524	0.89116	1.24637	1.99041	1.79276	2.01469	0.781553	1.35546	0.906278	1.48602	0.718027	0.786743	0.870937	0.8637	1.96332	0.771605	0.865294	1.24904	1.04134	0.780836	0.722882	7.86828	3.96532	3.51978	1.16215	0.879401	0.949387	0.662695	0.940923	1.05851	1.08561	1.1563	0.815373	1.36833
995	1.18286	1.55166	1.71165	1.01621	0.606957	0.658063	1.50813	0.844533	1.37787	1.28455	1.59519	0.943403	0.687905	0.621231	1.12504	1.22105	0.801489	1.11387	1.30052	0.776553	0.678385	0.866373	0.584164	0.546077	0.910538	1.028	0.78907	0.855288	0.679315	4.48288	0.854034	0.852508	3.52975	0.792497	1.35926	1.39706	0.871013	1.19439	0.87734	1.0286	2.02635	0.441234	0.636962	1.30866	0.674192	1.24498	1.32829	0.712743	0.677348
996	0.767151	0.776346	0.777017	0.511592	0.743804	1.02295	2.45942	0.88152	0.865563	0.846013	1.01465	0.558742	0.77182	0.664576	0.588298	0.72381	1.02978	2.34671	1.77181	0.828768	0.711285	0.998265	1.59652	1.33756	0.904193	1.01824	0.960901	0.992486	0.813831	2.39009	0.966546	1.12791	0.927076	1.03598	0.566636	0.63334	0.969349	0.918262	1.16417	0.800431	0.690959	1.10388	0.874904	0.943477	0.673993	0.388427	0.831828	0.744886	0.945957
998	0.92201	0.941423	1.79818	1.54521	1.02107	1.88819	1.02119	1.5336	0.658107	1.70595	1.03443	1.30534	1.04258	1.29317	1.2005	1.25738	0.913876	1.23407	1.225	1.10636	1.18985	1.33337	1.47807	1.31576	1.14183	1.05148	1.25758	0.915274	1.18129	1.3022	1.28942	1.34224	1.42146	1.2454	1.34852	0.905343	1.35896	1.25835	1.36173	1.17971	0.895509	1.16666	1.2104	1.39874	1.18914	1.31158	1.47937	1.46194	0.745104
1001	0.572121	0.724364	0.491888	0.46701	0.63687	0.761848	2.88338	0.801436	0.895119	0.543146	0.671744	0.38741	0.59567	0.494647	0.621964	0.598909	0.768078	1.98901	2.19746	0.792985	0.705572	0.847327	1.17191	0.975705	0.895155	0.880278	0.724677	0.752954	0.670608	2.19614	0.806321	0.837156	0.747708	0.797585	0.5082	0.569058	0.571044	1.5896	1.04666	0.72263	0.548054	0.849115	0.810226	0.659428	0.661892	0.418851	0.828105	0.603728	0.828564
1002	1.34583	1.58609	1.30895	2.20945	1.66773	1.18793	1.1739	0.99079	0.993538	1.82135	1.53995	0.891225	2.17293	1.06146	0.762687	1.3485	1.19479	0.945955	1.25667	1.38373	1.40909	1.50156	1.05749	1.0725	1.42108	1.31888	1.96813	1.10302	1.52669	1.31769	1.15552	1.40105	1.30177	1.25841	1.60386	1.61256	1.25495	1.32083	1.20366	1.4674	1.24796	1.47259	1.47642	1.31279	1.47032	0.771989	0.694938	1.21678	1.09369
1004	0.644977	0.869469	0.641995	0.639289	0.801451	0.879069	2.82174	0.726722	0.929026	0.778261	0.855985	0.497464	0.730649	0.673413	0.649772	0.624349	0.847049	1.8221	2.25553	0.961378	0.818554	1.01389	1.00479	1.07121	1.0207	0.809165	0.879004	0.736188	0.829857	2.50191	0.713623	0.860719	0.802898	0.790777	0.701884	0.761875	0.788148	1.77702	1.05814	0.812976	0.769855	0.906925	1.01004	0.769489	0.869701	0.468297	0.695593	0.712596	0.751799
1005	1.21928	1.52415	1.7521	1.06824	0.774251	0.695453	1.5276	0.814968	1.48298	1.37984	1.88672	1.04677	0.831537	0.683821	1.18108	1.18521	0.864646	1.21146	1.30954	0.8652	0.692948	0.913134	0.763113	0.615058	0.940762	1.22192	1.00816	0.85041	0.705015	4.56559	0.843801	0.905392	4.07023	0.862407	1.42529	1.48522	0.948281	1.0754	0.848507	1.05554	2.17677	0.571159	0.76112	1.30495	0.822428	1.14729	0.890515	0.711363	0.785972
1006	0.916732	1.0378	1.06449	0.835609	0.942041	1.01206	1.04373	0.977547	1.1115	0.897962	1.0938	0.488817	0.918733	1.00923	0.858367	1.03738	1.05513	0.857573	0.939209	0.96264	0.926884	1.17707	1.11838	1.36242	1.17816	1.05426	1.05589	1.14271	0.882797	0.764813	1.10796	1.13814	0.960287	1.05359	1.06407	0.924798	0.962081	0.768241	1.02538	1.03085	1.01952	1.3026	1.11217	1.11814	0.91608	0.56436	0.893242	0.846955	0.972209
1009	0.810129	0.935696	0.764892	0.585947	0.928273	0.966699	2.02118	0.9406	1.00722	0.752839	1.01174	0.566284	0.815103	0.758889	0.603739	0.834606	0.960404	1.5469	1.35573	0.97442	0.83381	1.06213	1.16242	1.11731	1.09518	0.987048	1.04019	0.979795	0.929841	1.52593	0.772966	1.14357	0.873018	0.893771	0.751695	0.781878	0.810564	0.968307	0.935778	0.845541	0.654594	1.11886	1.08248	0.938748	0.891276	0.463222	0.745894	0.79808	0.984874
1010	0.959675	1.46838	1.12115	0.951663	1.2709	1.33241	1.22461	0.943051	1.24528	1.18626	1.34843	0.7712	1.08696	1.10432	0.950901	1.06388	1.02125	0.927874	1.10668	1.20069	1.10606	1.4676	1.17985	1.27281	1.3111	1.36617	1.46147	1.20197	1.14698	1.02854	1.0811	1.54601	1.0138	1.08775	1.24852	1.19919	1.13291	0.984719	1.38154	1.20098	1.18871	1.27976	1.389	1.38394	1.24014	0.628454	0.783686	1.01178	1.11576
1011	1.21052	2.42709	1.96432	1.52564	1.2638	1.10292	1.20034	1.25504	1.00492	2.67731	1.16564	0.643403	1.98489	1.42746	0.822823	1.32538	1.1288	1.08999	1.70959	1.52548	1.62348	1.20481	0.854971	1.10463	0.910275	1.97837	1.91314	1.2547	1.0894	1.31132	1.57849	1.29056	0.820592	1.15959	1.54952	0.813238	4.84856	3.20778	2.38561	1.04187	1.5115	1.83191	1.1053	0.915864	1.11755	0.706117	1.58675	1.16567	2.57467
1012	1.07326	0.987771	0.886767	0.95792	0.838301	0.835734	0.977621	1.01585	0.910598	1.0338	0.728278	1.04919	1.0795	1.04169	1.04725	0.962682	0.819535	0.685562	0.918271	1.15549	1.01511	1.25231	0.989653	0.975808	0.842662	1.24465	0.867361	1.08157	1.03403	1.0459	1.09913	1.26502	0.919537	0.840396	0.985964	0.843712	0.913512	1.04784	1.0684	1.18121	0.960997	0.790928	1.00721	0.896963	1.33942	1.78627	1.3778	1.22367	0.994851
1013	1.05344	0.99695	1.54827	1.28333	1.00657	1.09269	1.20041	0.934917	1.53247	0.929921	0.973185	0.915738	1.02259	1.12387	0.768852	1.70063	1.00692	1.93993	3.66521	3.44126	2.68494	0.903322	1.93538	1.11129	1.87338	1.27806	0.822612	1.23973	2.62033	2.22359	0.705255	2.1193	2.90267	0.930664	0.837117	0.714619	4.4839	2.11634	1.87456	1.01271	1.13827	1.01921	2.41829	1.00798	0.817497	1.09431	1.40115	0.792133	1.52559
1014	1.22582	1.31397	1.42839	1.1075	1.07249	1.57781	1.29144	1.0996	0.89966	1.17229	0.844019	0.764885	2.1415	1.26236	0.879304	1.12294	1.12459	0.946668	1.25083	1.24565	1.25038	1.41437	0.924068	1.21118	1.27794	1.12616	1.68635	1.23353	1.46513	0.95347	1.20632	1.09215	0.91382	1.37175	1.54495	1.09686	1.09842	1.32239	0.997998	0.965065	1.26493	1.51948	1.30576	1.04097	1.14737	0.750767	0.934353	1.02176	1.02338
1015	0.947683	1.05959	0.925273	1.01996	0.939339	0.89677	1.08611	1.02467	0.93571	0.875907	0.85482	1.08045	1.06893	0.996336	1.09913	0.940185	0.855268	0.809067	0.868961	1.06327	0.976772	1.16341	0.996516	0.982759	0.910666	1.23316	0.912983	1.07636	1.02512	1.00789	1.10635	1.10103	0.912873	0.891105	1.00714	0.971905	2.20909	1.00381	1.13948	1.19583	1.10258	0.847843	0.983769	0.968352	1.14523	1.71647	1.28044	1.14009	1.0964
1017	1.22257	0.825368	1.04846	0.820304	0.64863	0.882447	1.01331	1.37815	0.885296	0.872611	0.787023	0.842565	1.29499	1.28888	0.837214	0.785628	0.969899	0.743109	0.629047	0.877428	1.09655	1.12804	1.23119	1.15173	0.921484	1.14881	0.712266	1.18133	0.801739	1.97025	1.07372	0.891719	1.24673	1.02457	0.889632	0.814274	1.0309	0.890042	1.00198	1.00693	1.09886	0.846005	0.935923	0.694685	0.989577	1.53926	1.75399	1.01929	0.90111
1018	1.05592	1.29476	1.2296	1.41121	1.30235	1.49859	1.18804	0.945258	1.00858	1.49054	1.24294	0.707988	1.26165	1.32867	0.819455	1.26912	1.1149	0.975997	1.18909	1.21708	1.18486	1.22826	0.956298	1.28255	1.29574	1.3797	1.58142	1.16594	1.17633	1.13452	1.10682	1.32366	1.03626	1.26282	1.45955	1.15212	1.04193	0.993872	1.11138	1.10302	1.09676	1.25861	1.38023	1.18315	1.1604	0.591154	0.862815	0.973451	1.08948
1020	1.24339	1.49634	1.61829	1.05904	0.858984	0.889929	1.41042	0.965217	1.2619	1.38428	1.81622	1.26092	1.21792	0.842387	1.09965	1.27158	1.17994	1.18537	1.19531	0.918494	0.783532	1.06675	1.01812	0.791675	0.994569	1.30631	1.30602	0.829319	0.802621	3.48464	0.853849	0.967431	3.42091	1.00151	1.32758	1.46504	1.12788	1.1045	0.937925	1.07854	2.10122	0.666938	1.02152	1.15796	0.918003	1.08036	0.618438	0.900719	1.02362
1022	0.864356	0.921819	0.903665	0.881993	0.661066	0.813052	0.94956	1.09637	0.840236	0.85166	0.717071	0.894329	0.955355	0.92746	0.88784	0.924865	0.785499	0.754988	0.771176	1.06827	0.932366	1.00721	1.01764	1.79247	0.745732	1.34219	0.781208	1.1218	0.924554	1.00198	1.00855	1.09722	0.948249	0.853156	0.874303	0.723484	0.84421	0.904878	0.95925	1.05843	0.881768	0.754387	0.889433	0.876923	1.19542	1.8469	1.46907	0.975707	1.05229
1027	1.37084	1.48757	1.3058	1.1089	0.92274	1.00637	1.09605	1.09054	0.937546	1.38959	1.43279	1.47591	1.52954	0.99906	0.868985	1.08263	1.60622	0.81346	0.809684	1.06837	1.01162	1.04332	1.20493	1.13401	0.97928	1.7002	1.49629	0.832812	0.873145	1.73878	0.854798	1.11943	2.27246	1.32607	1.20793	1.41543	1.2319	0.966797	1.01066	1.07722	1.37225	0.866125	1.1697	1.00844	1.15411	1.0981	0.69355	1.17106	1.36137
1032	1.19209	1.4471	1.65501	1.03672	0.698198	0.586046	1.51641	0.709994	1.37265	1.05686	1.45537	0.925908	0.826763	0.710834	1.0742	0.995999	0.679253	0.964893	1.31271	0.74007	0.61535	0.867488	0.6669	0.486474	0.823043	1.12705	0.837851	0.833937	0.709259	3.85769	0.860432	0.859949	2.92566	0.66532	1.49678	1.18965	0.746661	1.11073	0.794798	0.951819	1.59244	0.567651	0.558252	1.29695	0.740492	1.2216	1.54593	0.708249	0.547051
1036	1.0385	1.0715	0.923627	0.96917	0.999285	0.950982	1.10619	0.885289	0.95758	0.881677	1.02836	1.13556	0.941911	0.976965	1.08104	1.09667	0.825137	0.912527	0.899753	1.08365	1.03008	1.19011	0.980482	0.933857	1.00705	1.18681	0.959048	1.11437	1.04996	0.843842	1.14467	1.18491	0.973669	0.990845	1.00714	0.998381	0.981463	1.00664	1.19544	1.22145	1.03932	0.943769	1.03395	1.01734	1.10994	1.4446	1.05775	1.17311	1.12681
1037	1.02467	1.51968	1.86938	1.10661	0.786551	0.710333	1.57888	0.811479	1.31005	1.28337	1.60209	0.936861	0.947241	0.640503	1.23606	1.09757	0.796808	1.22873	1.50997	0.683977	0.721859	0.917115	0.759339	0.551205	0.871352	0.925714	0.908489	0.766391	0.757309	3.92894	0.853296	0.918358	3.09187	0.856566	1.35733	1.34546	0.964597	1.17691	0.926401	1.08052	1.57681	0.575121	0.581495	1.32668	0.774431	1.06129	0.852896	0.787205	0.701212
1041	1.31888	1.44256	1.33169	1.07849	0.957468	1.09086	1.30638	1.11267	0.953467	1.44755	1.48301	1.41567	1.47785	0.988754	1.00985	1.15502	1.58581	0.939217	0.807861	1.00561	1.0399	1.13141	1.19488	1.00758	1.02716	1.58186	1.54902	0.744144	0.901509	2.10365	0.956685	1.1398	3.08137	1.18015	1.10888	1.44308	1.29538	0.998089	0.996187	0.985969	1.63278	0.695206	1.20076	1.09198	1.02434	1.04636	0.594406	1.13861	1.45933
1042	0.963606	0.989046	0.938696	0.919707	0.811834	0.834444	0.970064	1.03004	0.920392	0.934834	0.829527	0.976268	1.00071	0.97984	0.862792	0.926772	0.839287	0.726877	0.794955	1.09417	1.02581	1.03854	0.951928	1.06556	0.842867	1.19673	0.853127	1.08872	0.894235	0.83766	1.01349	1.15626	0.90965	0.843524	0.937769	0.878917	0.903504	0.834714	0.911277	1.08321	0.819732	0.770875	0.991479	0.976318	1.09882	1.90224	1.36037	1.05974	1.11937
1044	1.43449	1.72728	1.36415	1.01718	1.08939	1.23262	1.23687	1.07599	1.06772	1.66658	1.77345	1.66806	1.49465	1.22266	1.168	1.28773	1.87321	0.984227	0.747951	1.20643	0.920788	1.0409	1.46997	1.07243	1.11233	1.69276	2.0533	0.729567	0.903128	1.20815	0.949752	1.16229	1.46712	1.45665	1.29804	1.8106	1.45946	1.02644	0.995995	1.0468	0.964836	0.929969	1.36162	1.16632	1.14494	0.844571	0.577194	1.16576	1.56157
1048	0.927239	1.64311	2.02887	1.19896	0.953773	0.883799	1.78348	0.57555	1.46092	1.44452	2.05343	1.274	1.26375	0.665318	1.31699	1.37179	0.924909	1.2995	1.70271	0.855879	0.988983	0.98674	0.563161	0.619596	0.999522	0.865726	1.13612	0.755149	0.766824	4.06023	0.866425	0.743811	1.6679	0.899402	1.36562	1.48486	1.15748	1.10479	0.872433	1.15769	1.25107	0.684724	0.679126	1.39967	0.843472	0.955076	0.73466	0.788101	0.853273
1049	1.29554	1.28876	1.31204	1.03432	0.993768	1.42487	0.997622	1.7511	1.11759	1.56624	1.06616	1.17333	1.81409	1.47811	1.38884	0.816397	1.73098	1.56188	1.10096	1.30722	1.65936	1.45804	1.26904	1.25006	1.01017	1.64059	1.29707	1.38655	1.02816	1.14541	1.24726	1.01598	1.21611	1.47015	1.18782	1.02142	1.4805	1.42706	0.972565	1.17873	1.70906	1.11597	1.16191	1.20662	1.12245	1.09779	1.63128	1.29507	1.2263
1053	0.76754	0.678294	0.840096	0.590407	0.520046	0.726643	0.63037	0.834233	0.769709	0.586669	0.675793	0.605103	0.560607	0.834511	0.628301	0.708813	0.758404	0.771027	0.600698	0.564085	1.70598	0.524397	0.773672	0.994363	0.727778	0.896932	0.628066	0.786145	0.542199	0.627425	0.822132	0.627796	0.782441	0.814765	0.689724	0.615674	0.691464	0.605644	0.623885	0.682537	0.632946	0.872939	0.693203	0.713013	0.580828	0.788511	0.978869	0.649952	0.856664
1056	0.664465	0.715026	0.753106	0.576401	0.602597	0.616367	0.765522	0.701948	0.728484	0.617186	0.701442	0.680038	0.608581	0.750953	0.677661	0.774538	0.710501	0.825278	0.72178	0.659975	0.653836	0.608921	0.710302	0.903608	0.757571	0.860714	0.680253	0.735	0.611714	0.740946	0.80534	0.682157	0.682749	0.78021	0.696899	0.638482	0.703432	0.832804	0.705016	0.68711	0.645953	0.806265	0.70102	0.732987	0.699966	0.811423	0.989805	0.675722	0.806907
1057	0.62866	0.76562	0.70741	0.653319	0.691667	0.713451	0.858301	0.652701	0.739796	0.68364	0.732929	0.765819	0.67958	0.765531	0.777105	0.832652	0.659205	0.91851	0.965542	0.757398	0.725065	0.673199	0.642573	0.813723	0.783756	0.794671	0.759247	0.704837	0.706537	0.800254	0.777083	0.715813	0.650416	0.765899	0.743626	0.714228	0.7117	0.948103	0.756579	0.775719	0.696009	0.759637	0.727822	0.736673	0.825265	0.806191	0.87147	0.791855	0.748298
1058	0.870664	1.34098	1.06385	1.26819	1.14002	1.14224	1.24151	0.97779	1.05447	1.17207	1.06732	0.673556	0.972385	1.15146	0.828336	1.19531	0.928483	0.954528	1.24612	1.21498	1.10187	1.29397	0.983536	1.09733	1.16411	1.21087	1.22477	1.10604	1.22636	0.895802	1.0881	1.13708	0.983602	1.16272	1.24662	1.05495	0.95549	0.935028	0.999942	1.17713	1.12671	1.10635	1.11765	1.10979	1.26026	0.652792	1.08628	0.869707	0.938504
1064	0.793211	1.07667	1.61138	1.37379	0.96067	1.30798	1.16085	1.80678	1.96049	1.18648	0.992359	0.637247	1.44272	2.00403	1.17529	1.21313	0.944897	1.91072	1.36051	1.30027	1.86093	1.14341	1.29702	0.872646	1.25147	1.17403	1.21885	1.10458	2.42714	1.44394	1.56465	1.55325	3.69573	1.40101	1.27471	1.21935	1.56794	1.43393	1.75994	0.983003	1.17957	1.03202	1.74892	1.0025	0.924334	0.912538	6.40227	0.86055	1.41979
1065	1.12521	1.06328	1.26761	0.748852	0.824289	1.31154	0.944382	1.3097	1.12694	1.18891	0.963375	0.990845	0.934534	0.980922	0.811619	1.05567	1.15734	1.07289	0.949561	0.926662	1.33604	1.1074	1.06017	1.01393	1.0738	1.12938	0.862208	0.879042	0.645645	1.01241	0.920097	1.12211	1.12146	1.1847	1.1566	1.15627	1.1848	0.864687	0.933071	0.932073	1.34456	1.30404	1.13483	0.934552	0.801365	1.05244	1.27305	0.976163	1.09478
1069	0.966517	2.59325	1.58959	1.24132	1.25805	1.59098	1.26084	1.74739	1.4364	2.01052	1.12313	0.951159	1.91961	1.54203	0.77285	1.18063	0.991752	0.817644	1.33859	1.45087	1.39384	1.15757	0.994499	1.18102	1.08811	3.91334	1.08051	1.16085	1.0977	0.856929	1.70289	1.07562	1.13204	1.7373	1.55918	1.12931	1.3706	1.04477	1.43872	1.14297	1.31644	1.19008	0.533715	1.15496	1.86413	1.41217	1.03798	1.72642	1.06573
1071	0.949712	0.667036	1.01863	0.490836	0.562658	0.801439	0.707432	1.04621	0.834923	0.57312	0.914015	0.336607	0.67546	0.778884	0.52733	0.737627	1.00054	0.762325	0.552203	0.615334	0.646959	0.730896	1.04598	1.32076	0.876015	0.787535	0.670524	0.991875	0.460551	0.634825	0.838525	0.833516	0.996976	0.950748	0.573556	0.553991	0.910738	0.466102	0.776563	0.72928	0.793264	1.15471	0.94554	0.969775	0.533011	0.397901	0.671427	0.565308	1.05711
1073	1.13205	1.22508	0.959629	1.16576	1.22883	1.21502	1.25232	0.925361	1.04039	1.06463	1.28858	1.25185	1.09374	1.0161	1.16879	1.24303	0.989828	0.96075	0.965403	1.14736	1.12367	1.22533	1.01844	0.881864	1.13222	1.11601	1.12582	1.07074	1.14939	0.91292	1.13594	1.14739	1.0389	1.03446	1.03064	1.15705	1.04534	1.02883	1.24264	1.28339	1.17931	0.880671	1.05133	1.0945	1.01067	1.15636	0.834288	1.28445	0.963748
1074	1.08039	1.12813	1.22777	1.05076	1.09905	1.23826	0.757305	1.10648	0.938327	1.09268	1.08095	0.92163	0.888199	1.55107	0.622772	0.925257	1.09196	0.861507	0.964213	1.0562	0.885264	1.10001	0.974956	1.14486	1.07626	1.06886	1.29753	0.905344	1.2067	1.08606	0.867304	1.02283	1.03754	1.35333	1.20945	1.08855	1.09018	0.767224	0.913336	0.918704	1.17567	1.20967	1.10747	1.10286	0.879185	0.862948	1.03879	0.855855	0.980508
1078	1.17362	1.35436	1.54358	1.3308	1.28403	1.27885	0.765875	0.896494	1.46739	1.22764	1.27296	1.24761	1.33357	1.78434	0.915396	1.11755	1.24169	1.1085	1.32237	1.23326	1.8036	1.46963	0.776176	1.08355	1.25522	1.31446	1.32402	1.01735	1.02853	1.87589	1.23082	0.864075	1.22246	1.24118	1.41438	0.929374	1.62747	1.82711	1.76581	1.20323	1.15372	1.26268	1.04642	1.14235	1.0816	0.799783	0.861754	0.927728	1.08564
1080	0.614629	0.696043	0.822442	0.74189	0.603241	0.779007	1.03031	0.942911	0.879227	1.0538	0.879719	1.28733	1.00906	0.884777	1.19397	1.18196	0.617116	0.597439	0.575975	1.02147	0.782399	1.00657	0.727109	0.90258	0.694089	1.26894	0.754672	0.653479	1.04269	1.20388	1.24163	1.26255	0.682782	0.666517	0.932263	0.69014	0.899504	0.926423	1.14015	0.942202	0.816413	0.696773	0.761435	1.00633	1.32027	1.18491	1.31384	1.10587	0.661971
1082	0.806181	0.47578	0.74984	0.31242	0.332813	0.591857	0.592577	0.963154	0.64375	0.466579	0.666092	0.323368	0.535767	0.528014	0.565051	0.513629	0.846252	0.767323	0.26259	0.400334	0.583155	0.592974	1.05431	1.36577	0.613975	0.603329	0.503658	0.858928	0.348754	0.730093	0.821237	0.725989	1.14709	0.709849	0.441161	0.398695	0.882087	0.388053	0.723841	0.740128	0.584297	1.07806	0.696658	0.670426	0.288037	0.408603	0.566146	0.524998	0.938815
1084	0.794615	0.38372	0.990438	0.303745	0.382264	0.65477	0.596083	1.17986	0.745871	0.400499	0.801062	0.180464	0.504287	0.758741	0.469101	0.652314	1.01469	0.729508	0.464487	0.377563	0.456903	0.629983	1.01106	1.54457	0.51281	0.518925	0.517835	1.07434	0.438776	1.25485	0.756054	0.797598	0.940163	0.926895	0.419442	0.414358	1.01977	0.415503	0.65025	0.653659	0.739128	1.09341	0.732652	0.846819	0.294092	0.285005	0.642031	0.428422	1.04047
1090	0.916559	1.24313	1.12443	1.09022	1.27984	1.42465	0.965372	1.06451	1.2012	1.11732	1.21337	0.706056	1.36591	1.58151	0.85939	1.00329	0.976309	0.980352	1.67292	1.19469	1.20579	1.21686	1.03002	1.14768	1.20024	1.22977	1.17424	1.17888	1.43202	1.69541	0.865117	1.12288	1.02669	1.34539	1.09645	1.10276	1.01638	1.50281	1.56881	1.19793	1.05494	1.14465	1.10493	1.11627	1.45427	0.736354	1.11362	0.98089	0.980388
1091	0.89979	0.609734	1.02514	0.663843	0.49835	0.798305	0.588081	1.04841	0.83862	0.525364	0.969861	0.485062	0.756873	0.769061	0.569984	0.892071	1.06466	0.823307	0.568721	0.494889	0.666894	0.725028	1.09898	1.33513	0.715228	0.723399	0.692286	1.09023	0.477316	1.14451	0.768524	0.996597	1.00623	0.894793	0.557617	0.606173	0.84265	0.462417	0.656891	0.69302	0.772472	1.23036	1.08737	1.06269	0.380617	0.336631	0.771487	0.614845	1.00474
1096	1.39588	1.33847	0.957243	1.50199	1.34722	1.24922	1.42924	0.799094	1.00423	1.14893	1.286	1.45415	0.932447	1.05456	1.14306	1.21131	1.1268	0.991964	0.967473	1.26656	1.06331	1.20761	1.01035	0.862942	1.21809	0.978452	1.20911	0.997747	1.26327	0.813059	1.06436	1.14303	0.969112	0.979822	1.06885	1.2685	0.940565	1.01976	1.21867	1.21376	1.14772	0.781435	1.04078	1.01011	1.20778	0.989555	0.841293	1.22942	1.05482
1098	1.20223	1.06472	1.42169	1.45269	1.07952	1.37178	0.954785	0.736909	1.05266	1.28133	1.10516	0.953351	1.45983	1.07068	1.14164	1.02831	0.993758	1.26427	1.07537	1.25	1.08491	1.03963	0.610858	1.19773	1.35506	1.26171	1.17899	0.851585	0.969878	2.5978	1.03991	0.885365	1.89453	1.44938	1.61837	0.948823	1.14345	0.855175	0.899567	1.19254	2.69349	0.975658	1.005	1.32415	1.66887	1.19836	1.14168	1.09115	1.37812
1099	0.694883	0.496972	0.759279	0.398303	0.477933	0.54334	0.635979	0.831001	0.839836	0.630344	0.831563	0.83526	0.622444	0.588945	0.738058	0.817966	0.692291	0.54857	0.330534	0.610911	0.637912	0.68288	0.896436	0.81043	0.543562	0.657937	0.456342	0.696292	0.569877	0.761735	0.767419	0.907343	0.673877	0.560699	0.522494	0.504777	0.836047	0.558047	0.928486	0.803731	0.648982	0.670579	0.80063	0.785272	0.712446	0.791978	0.82394	0.818038	0.798564
1103	0.893957	0.808258	1.32585	0.890767	0.809736	1.22735	0.911053	1.26678	1.02365	1.26137	1.24667	0.640414	1.26214	2.36341	0.939955	1.54949	0.931387	1.05072	1.30379	1.13036	1.06194	0.850602	1.01358	1.13251	1.21636	0.731427	0.848388	1.30115	0.417613	2.28937	1.22249	1.37561	1.91536	1.12491	0.920375	0.985421	1.11539	1.08115	0.958981	0.776938	1.34193	0.991184	1.27986	1.02964	0.753587	1.10598	1.1634	1.10141	1.31459
1104	0.690098	1.10994	1.65966	1.13909	0.773298	1.37572	1.30276	0.80413	2.17624	1.26277	0.74854	0.849446	1.1955	3.80097	1.024	0.83175	1.12729	2.40814	1.60447	1.6254	1.67318	0.812876	1.90144	0.847731	1.11401	1.46717	0.857739	0.641449	1.89217	2.67507	0.889623	1.06739	2.81982	0.876394	1.00115	1.10677	3.48397	2.28912	1.86806	1.13385	1.47811	1.13416	1.16542	0.757529	0.399436	0.889064	1.28103	0.912414	1.45719
1106	0.617889	0.731159	0.797715	0.750765	0.670366	0.68729	0.856642	0.866168	0.954679	0.971258	0.899551	1.28813	0.933006	0.923186	0.960619	1.11402	0.637846	0.593993	0.628199	0.90263	0.857304	0.977936	0.664222	0.758853	0.636926	1.05278	0.695459	0.729302	0.964492	0.827947	0.985513	1.15477	0.614235	0.665974	0.929255	0.684262	0.895735	0.834311	1.04702	0.983927	0.72744	0.71783	0.786324	0.872601	1.18689	1.20032	1.19569	0.962765	0.649463
1123	0.947466	0.895465	1.25152	0.937222	0.773534	0.602224	0.773051	0.969897	1.13141	1.23803	1.03682	1.85003	3.53319	1.47828	1.34907	1.38305	0.788102	1.25965	1.02079	0.951448	2.28156	1.11024	0.913144	1.28059	1.05842	1.46206	1.04341	1.30282	1.04197	2.43339	1.29992	1.39058	0.816066	1.09096	1.49848	0.856823	1.37965	0.747118	1.06326	1.07538	1.72367	1.23611	1.34914	0.879636	1.53488	1.32851	1.8259	1.18124	1.10314
1125	1.01247	0.843577	1.16439	0.901435	0.914624	1.33095	0.819609	1.41378	1.06017	0.98942	1.27898	0.937365	0.996956	1.31175	0.945161	1.08482	0.909772	1.25068	1.31505	0.996547	0.897337	1.07087	1.05124	1.63479	1.21355	0.996183	1.37997	1.22055	0.916632	0.917983	0.849062	1.07545	1.11182	1.6081	1.24233	1.0198	1.08911	1.31654	1.42937	0.92417	1.3093	1.69777	1.01901	1.05935	1.08743	0.983339	0.986688	1.08796	1.2216
1129	1.11963	0.765194	0.87002	0.93606	0.930749	1.07013	0.777693	0.80325	0.791247	0.9436	0.946706	1.14247	1.20671	0.83923	0.868117	0.932847	0.949353	1.32152	1.30861	1.21727	1.30908	0.982932	1.2255	1.17032	1.3756	1.19115	1.09972	1.43323	1.06818	0.437723	1.31185	1.04448	1.15337	1.9514	1.70004	1.47527	1.15186	1.59717	1.55529	1.55592	1.30274	2.0983	1.72341	1.4956	1.41172	1.11704	1.44248	1.78083	1.552
1131	0.894542	0.717568	1.25158	0.891361	0.793651	0.982556	0.709791	1.52018	0.948048	1.2554	1.21678	0.64488	0.575845	1.21062	0.66172	0.989216	0.929349	1.27664	1.0531	0.914646	0.690185	0.808954	1.02243	2.04763	1.25792	0.980945	1.24288	1.33824	0.909529	1.08282	1.06582	0.826482	1.38788	1.58402	1.24303	0.864056	1.33675	0.873722	1.01256	0.747701	1.13033	2.11068	1.13837	1.1384	0.786269	0.679501	0.914691	0.739183	1.23814
1133	0.789653	0.868285	1.00276	0.927519	0.964628	1.05251	0.883052	1.17976	0.986251	1.00188	1.00252	0.990455	0.783842	0.85446	0.996077	1.04174	0.953444	1.1545	1.38284	0.918879	0.796289	1.17588	0.973263	1.41881	1.23629	0.993901	1.48333	1.00352	0.990422	0.744704	1.20132	1.03346	0.957402	1.44649	1.10485	1.13837	0.933221	1.57616	1.17174	0.918315	1.14447	1.50502	1.11209	1.06359	0.928614	0.926988	0.75458	1.17861	1.04846
1135	0.825266	0.425594	3.09478	0.667317	0.5703	0.780303	1.06628	0.995359	0.732464	1.26342	0.890496	0.528537	0.644573	1.47167	0.74731	0.773677	0.681583	0.91052	4.24119	2.92449	1.63421	0.952861	0.736159	1.04034	0.547014	0.61366	0.868313	0.639697	0.712729	1.57431	0.763183	0.664068	0.841216	1.36748	1.14753	0.595734	1.02148	2.62274	2.04994	0.62383	1.49162	0.958176	0.632828	0.54976	0.996737	1.0814	0.850778	0.562387	0.761354
1141	1.08967	1.02495	0.893933	2.10331	1.15798	1.08289	0.862948	1.46605	0.938652	1.38419	1.07913	1.46777	1.65065	1.83457	0.996731	1.39203	1.17843	1.21545	1.43361	1.04499	0.947945	0.99242	1.26788	1.69714	0.764615	1.61373	1.62302	1.40576	1.54675	1.15967	1.58736	1.19423	1.25071	1.38878	1.24203	0.758262	0.864146	0.93061	1.07675	0.946781	0.782884	1.50288	1.33547	1.16274	0.920413	1.51308	1.7194	0.715853	1.29044
1143	1.14845	0.983181	1.07188	1.98356	1.09192	1.52087	0.897631	1.85571	0.888114	1.28574	1.07106	1.0607	1.15888	1.59979	0.802321	1.28457	1.18165	1.35522	1.412	1.19108	1.05611	0.788943	0.954422	1.64652	0.887927	1.29125	1.09872	1.31813	1.41188	0.990667	1.32214	0.898454	1.41925	1.57071	1.03237	0.836125	1.19997	0.973289	0.91656	0.951996	0.861778	1.75819	1.25401	1.3547	0.821739	0.959322	1.15415	0.603501	1.21791
1148	0.569633	0.528555	0.538033	0.419529	0.416283	0.483502	0.466623	0.523536	0.54213	0.467803	0.520311	0.265104	0.353776	0.488777	0.282076	0.424716	0.538278	0.742	0.491713	0.539093	0.339747	0.329416	0.456678	0.72418	0.62694	0.48454	0.536229	0.682458	0.528628	0.469931	0.435296	0.396082	0.562279	0.503097	0.472959	0.505867	0.339768	0.299722	0.329309	0.356276	0.317847	0.572586	0.510956	0.603352	0.480657	0.262855	0.434415	0.261838	0.513992
1152	0.57638	0.551206	1.74236	0.527883	0.429753	0.713578	2.12419	0.459405	2.51505	0.447608	0.487609	0.336284	0.631702	0.487017	0.455059	0.345648	0.565569	4.49606	1.3322	1.15301	1.71084	0.363206	1.67889	0.610262	2.36189	0.584223	0.535919	0.564549	0.505026	1.76959	0.785634	0.390449	4.69237	0.463433	0.419897	0.513769	3.05849	1.00385	0.589769	0.737004	1.01958	0.588644	2.0393	0.54012	0.478444	1.13061	1.31084	0.346042	1.2928
1154	1.42502	1.08042	1.77922	1.29932	1.27066	1.29403	0.973282	1.67757	1.0648	1.1484	1.14684	0.711715	1.089	1.46837	0.831687	1.28988	1.13782	1.78857	1.56863	1.15818	1.11319	0.709556	1.04136	1.89838	1.40201	1.05369	1.03392	1.33787	1.16537	1.53618	0.910018	0.852552	1.0759	1.47015	1.16371	1.22012	1.42889	1.00581	0.819037	0.852435	1.15178	1.7943	1.10541	1.19951	0.902604	0.676157	1.73598	0.75988	1.13897
1155	1.35604	1.73576	1.37927	1.35259	1.33337	1.24035	0.866607	1.79323	1.35736	1.30148	1.18777	1.34076	1.3311	1.57286	1.02933	0.886272	0.776832	0.96019	0.784547	1.24232	1.33932	0.749847	0.845958	1.52805	1.10901	1.30629	1.22812	1.18005	1.23222	0.751206	1.09859	0.641778	1.57654	1.26551	1.33319	1.56992	1.4803	0.885539	0.997069	1.05094	1.14444	1.46031	0.881688	1.47368	1.59226	1.46853	1.55926	0.912345	1.09152
1156	0.838874	0.881665	0.993482	0.921194	0.943962	1.0484	0.948493	1.33923	1.00843	0.994904	1.02391	0.925463	0.750216	0.8924	1.02824	1.11263	1.03144	1.20313	1.37435	0.938873	0.779011	1.09971	1.00447	1.42607	1.24936	1.02744	1.46497	1.07909	0.993993	0.769558	1.2147	1.01684	0.976045	1.33048	1.06735	1.15515	0.973181	1.57429	1.14976	0.939529	1.14675	1.51524	1.10822	1.09802	0.925882	0.842501	0.837315	1.15085	1.06708
1157	1.47294	1.15983	1.99324	1.35429	1.12491	1.61672	1.09824	2.59124	1.29929	1.888	1.20744	0.622684	1.23069	3.30148	0.757846	1.24382	1.22209	2.11526	2.43909	1.22893	1.07755	0.709336	0.893401	2.34725	1.81066	1.27136	1.41545	1.64288	1.15433	1.31672	0.984765	0.874576	1.62793	2.07664	1.29194	1.15863	2.11724	1.32517	0.862479	0.759889	0.797421	2.04227	1.45971	1.43791	1.05839	0.591294	2.09249	0.784718	1.22062
1158	0.733903	0.983709	1.26474	0.955229	0.84088	0.967917	0.882284	1.36091	0.883198	0.810131	0.730386	0.783496	1.74321	1.22947	1.45943	0.821118	0.786282	1.03673	0.944905	0.980759	0.613457	0.690512	0.824735	1.39955	1.04448	1.77136	1.56098	0.882217	0.823311	0.813813	1.58469	0.727121	1.08962	1.40982	1.51391	0.968201	0.995024	1.01071	1.07662	0.578447	0.69924	1.10875	1.18882	0.875962	0.813702	1.47711	0.727884	1.9448	0.799305
1159	1.61156	1.91244	1.62246	1.50418	1.50249	1.53505	1.31475	2.39725	1.79633	1.43621	1.58627	1.13299	1.03237	1.85679	1.33594	1.43052	1.00565	0.667272	0.902989	1.27596	1.21824	1.18375	1.39001	1.76208	1.20175	1.92693	1.22641	1.26933	1.18587	2.85411	1.19634	1.62181	1.88027	1.59505	1.57122	1.6071	1.3701	0.930944	1.22197	1.20558	1.37945	1.54029	1.01417	1.57116	1.70186	1.31732	1.6958	1.32043	1.11005
1162	0.584376	0.516179	0.675233	0.390248	0.405164	0.490773	0.457454	0.640347	0.565623	0.498671	0.531211	0.232205	0.342638	0.495052	0.280647	0.403326	0.541223	0.671182	0.461796	0.525117	0.385844	0.334998	0.529208	0.797194	0.609879	0.503069	0.468552	0.758344	0.476249	0.462364	0.464389	0.391098	0.579322	0.483675	0.436442	0.49626	0.548687	0.28744	0.316707	0.367829	0.342251	0.634866	0.575851	0.608232	0.449461	0.272744	0.458484	0.27845	0.573406
1165	0.691825	0.504341	0.826642	0.50288	0.478271	0.599022	1.00726	1.02452	0.625817	0.565477	0.724421	0.245046	0.391509	0.603599	0.490451	0.467029	0.666475	0.970178	0.680913	0.573937	0.521059	0.317095	0.566294	1.13417	0.679406	0.531694	0.500958	0.805979	0.551305	0.665595	0.486631	0.42913	0.815138	0.73414	0.473105	0.510468	0.870325	0.407472	0.439862	0.46749	0.437613	0.909921	0.66698	0.676037	0.413432	0.324914	0.761429	0.326035	0.679795
1166	2.15071	0.997783	1.64796	1.48267	0.986969	2.22758	0.948565	3.10718	1.25244	1.38174	1.39779	0.57376	0.86852	2.6059	0.379979	1.40403	1.87017	2.13796	1.68602	1.36389	1.27164	0.733409	0.906074	2.61833	1.07646	0.877062	0.882196	1.62225	1.34339	1.35313	1.10997	0.844581	1.58011	2.02109	1.24373	0.953313	2.07257	0.934431	0.460059	0.93163	1.10016	2.43085	1.01669	1.47119	0.853153	0.629542	1.11356	0.521843	1.36264
1167	1.11867	0.944586	1.01871	1.1465	1.07015	1.4478	1.02743	1.5935	1.12244	1.18153	1.19477	1.18968	1.78632	1.69825	0.479124	1.26486	1.37321	2.52713	1.05333	1.04258	1.21158	1.04164	0.977757	1.71641	1.01041	0.979421	0.953655	1.67187	1.24919	3.14691	1.31922	0.970103	2.76042	0.911219	1.01971	1.11023	1.20675	1.40392	1.05399	1.01821	1.49093	2.05563	1.08852	1.15982	1.04038	0.969807	1.36737	0.47678	0.943691
1168	1.33946	0.86666	2.58353	1.75067	1.25215	2.50392	1.00877	2.69947	1.11363	1.36339	1.44116	0.522412	1.07682	2.306	0.433473	1.38127	1.74996	2.54948	1.7549	1.38732	1.07496	0.735608	0.895302	2.4434	1.15378	1.07509	0.780847	1.462	1.23849	1.38819	1.53166	0.848031	1.65381	2.06288	1.02529	0.996448	1.48396	1.20296	1.06119	0.874464	1.21271	2.91357	0.939923	1.52831	0.842909	0.569718	1.32588	0.523098	1.47929
1169	1.68741	1.19123	1.4277	1.35484	1.12141	1.99181	1.0174	2.66281	1.14303	1.4781	1.49045	0.845628	1.01246	1.61254	0.826829	1.26214	1.46931	1.88445	1.45648	1.18752	1.09894	0.790663	0.987028	2.46112	1.39659	1.14677	1.266	1.88773	1.72844	1.25052	1.22691	0.915488	1.89979	1.89817	1.33039	1.1735	1.50576	1.13485	0.981515	0.876073	1.08125	2.42471	1.20857	1.40427	1.05224	0.685718	1.34694	0.714186	1.46744
1171	1.00374	0.777155	1.38495	1.18458	1.09332	0.977845	0.872631	0.566842	0.709262	0.967703	1.04644	0.878871	1.00822	0.871498	0.357093	0.842152	0.626421	1.01179	3.1059	2.34319	0.809566	0.789283	1.24564	1.2156	1.09735	0.985415	0.928484	1.09078	0.889136	0.922016	0.89815	0.697125	0.824068	1.03354	1.19966	0.913957	0.979194	3.91685	2.70734	0.950935	0.822287	1.05171	1.07303	0.989733	1.24302	0.597953	0.979304	0.715387	0.883377
1173	0.944172	0.993782	1.11445	1.47553	1.33444	1.23659	0.916661	1.42525	1.01422	1.2042	0.82818	1.61823	1.37943	1.49461	1.42152	1.34364	1.3073	0.864486	1.22054	1.40879	0.970439	1.43811	0.98197	1.53022	1.13698	1.28747	1.28957	0.862161	1.29864	1.10642	1.18739	1.29025	1.01913	1.15652	1.20689	0.682315	0.987185	1.09308	1.23158	1.38721	1.46341	1.52459	1.06968	0.863695	1.52795	1.52715	1.45484	1.30048	1.03906
1174	1.79297	1.16213	1.61206	1.21839	1.04616	1.67584	0.999818	2.63613	0.991334	1.73985	1.3416	0.77487	0.992458	1.96859	0.594361	1.50799	1.49556	2.36665	1.42591	1.22932	0.943552	0.644877	0.907081	3.01104	1.15093	1.05173	1.07332	1.86537	1.53201	1.11204	1.2401	1.00972	1.80208	1.81045	1.15748	1.32514	1.43176	1.01559	0.842253	0.837767	0.909245	2.36268	0.888035	1.61957	0.940713	0.761627	1.02593	0.62982	1.152
1175	2.12866	1.14057	1.31081	1.31425	1.09681	1.78489	0.897156	2.48663	1.03081	1.38183	1.253	0.773324	1.01223	2.20708	0.557789	1.08492	1.6329	1.59186	1.6198	1.15179	0.992623	0.652665	0.792496	1.83362	0.997044	1.15247	1.13944	2.01592	1.53873	1.25602	1.4316	0.678092	2.00279	2.01588	1.4631	0.811619	1.6228	0.978187	0.653063	0.833528	1.05353	2.71421	1.11038	1.51039	0.878146	0.669468	1.09937	0.517416	1.33468
1177	1.0967	0.734848	1.827	1.3918	1.05942	1.69779	1.00286	2.26481	1.48279	1.50526	1.1176	0.81126	2.20737	1.91294	0.430166	1.13824	1.08278	2.49047	1.73902	1.52144	1.06669	0.562046	0.817643	1.86078	0.929018	0.876597	0.863325	1.50026	1.28986	1.10459	1.57087	1.00379	1.69106	1.5756	1.10073	1.13538	1.05246	1.26924	1.03201	1.01271	1.67541	2.44092	1.02109	1.25945	0.655575	0.717998	1.25261	0.575007	1.34781
1178	2.2421	1.116	1.16429	1.38688	1.0966	2.07418	0.920103	1.5645	0.749089	1.75784	1.59582	0.80599	1.05471	2.18281	0.569255	1.05751	2.04074	2.70412	1.66827	1.3853	1.24334	0.713021	1.00015	2.85841	1.12599	1.09033	1.19164	2.13466	1.488	1.82519	1.41381	0.775781	2.27495	2.15165	1.61005	0.874844	1.82277	0.993195	0.684414	0.831173	1.0456	2.56887	0.886981	1.79346	0.870957	0.64138	1.24085	0.500676	1.45918
1179	2.03025	1.34532	2.31093	2.05065	1.61935	1.41013	1.35226	2.93619	1.07782	2.23591	2.08468	0.83969	1.41357	2.13884	0.869223	1.53798	2.04834	2.30375	2.54372	2.06315	1.12896	0.881352	0.907659	3.05786	1.51119	1.00072	1.07729	2.28575	1.61661	1.09073	1.30356	1.06908	2.12039	2.22864	1.43568	0.779327	2.46448	1.21887	0.994244	0.960272	0.912726	2.84181	0.981319	1.74785	1.27886	0.506201	1.24015	0.7327	1.21346
1181	2.29392	1.22346	1.48121	1.34304	0.978957	1.94153	0.872093	1.38106	0.943106	1.49097	1.6871	0.658604	0.944767	2.39396	0.511233	1.15677	2.12983	2.03305	1.672	1.23048	1.09193	0.558491	0.971795	1.93004	0.882472	1.20703	1.02082	1.83938	1.38444	1.40622	1.36551	0.722209	2.33993	2.22528	1.52302	0.792598	1.51848	0.943995	0.611427	0.815121	1.04579	2.97086	0.866273	1.70871	0.838606	0.57019	1.17749	0.482458	1.48357
1182	2.1345	1.04848	1.19851	1.44569	1.04519	2.16072	0.892056	1.78521	0.996504	1.2081	1.32151	0.834067	1.0974	2.41609	0.502421	1.05756	1.43622	1.97683	1.68191	1.27969	1.03967	0.66614	0.919712	1.83321	0.902736	1.2428	0.917851	2.39944	1.66651	1.99363	1.39755	0.709755	1.80945	2.10569	1.26388	0.872028	1.96546	0.950195	0.578604	0.887572	1.00528	2.48382	1.22613	1.61019	0.898928	0.682021	1.26481	0.527216	1.44598
1183	1.79317	1.07978	1.26178	1.18603	1.00743	1.6385	0.887747	3.52364	1.02143	1.0677	1.42571	0.792757	0.973667	1.92824	0.601756	1.42003	1.6312	2.28945	1.50167	1.16423	0.974133	0.64713	0.82272	2.10474	1.04517	1.16274	1.06219	2.08229	1.4242	1.343	1.28087	0.947989	1.84964	2.15125	1.26681	1.14298	1.69979	0.848835	0.596952	0.836064	0.969333	2.55509	1.05116	1.5567	0.926953	0.6633	0.930669	0.607954	1.17817
1184	1.08422	1.02404	3.62935	1.47266	1.06692	0.81896	0.809746	0.841795	0.50759	1.10771	1.19172	0.518487	1.27668	1.61861	0.643724	0.841023	0.749643	1.73235	2.99774	2.37896	1.72317	0.58163	2.91047	1.10853	0.603096	0.976191	1.30493	1.54837	1.31479	3.50558	0.699099	0.707121	3.25744	0.966787	1.14023	0.85908	1.71856	1.96669	1.29472	0.572501	1.85699	1.30344	0.63152	0.823386	1.02294	0.777441	0.714876	0.520674	2.08891
1185	1.8021	0.93672	0.918108	1.24316	0.948551	1.52865	0.887746	2.10266	0.881186	1.02483	0.960842	0.703483	1.04269	2.50127	0.620451	1.39372	1.35918	2.33414	2.10716	1.15158	1.01406	0.752885	0.80485	1.70106	0.862048	0.862554	0.851143	1.42796	1.67538	1.6701	1.28914	0.887561	2.0954	1.53203	1.0881	0.650667	1.84996	0.865107	0.650104	0.847631	0.87732	2.13246	0.934602	1.26712	0.900908	0.592658	0.79562	0.618158	1.30434
1186	1.66827	1.30015	1.43122	1.4173	1.20211	1.61246	0.962446	2.7607	1.14537	1.35761	1.46345	0.752147	0.949989	1.42545	0.750339	1.43258	1.52529	2.4681	1.58812	1.18351	0.848941	0.767156	0.896888	2.98149	1.19831	1.08131	1.00784	1.76592	1.33909	1.10872	1.55489	0.704352	2.03083	1.76531	1.15158	1.32022	1.41849	1.04722	0.826438	0.841557	0.844823	2.49499	0.796211	1.57779	1.10278	0.820517	1.16289	0.699235	1.20557
1187	0.748654	0.644013	0.850803	0.71962	0.750633	0.958488	0.828428	0.905958	0.606856	0.64053	0.673785	0.39684	0.684154	0.836322	0.570102	0.659888	0.603273	1.03719	0.907115	0.724	0.690404	0.428052	0.700667	1.1073	0.705124	0.573412	0.627959	0.822161	0.94152	1.25375	0.543646	0.477085	1.12345	0.835105	0.558161	0.561815	0.765668	0.581714	0.456016	0.488914	0.917795	0.883936	0.6528	0.785775	0.749606	0.487161	1.00984	0.446835	0.582965
1189	1.74468	1.15875	1.59541	1.34955	1.02849	1.84378	1.01903	2.60584	0.913065	1.36879	1.31915	0.778146	0.959129	1.41149	0.861735	1.32309	1.36055	2.01967	1.23506	1.11055	1.09086	0.677459	0.887784	2.6103	1.11374	1.15975	0.94237	1.83876	1.35657	1.02372	1.44937	0.932807	1.76111	1.62043	0.987907	1.06385	1.28975	1.03255	0.933366	0.837354	0.91363	1.97053	0.909015	1.12826	1.02136	0.810669	1.20122	0.817506	1.23724
1190	1.04962	0.778683	1.1329	1.10886	1.11288	1.2107	2.02097	1.03181	2.55709	0.939485	0.782028	0.434963	0.821414	1.02104	0.420583	0.623469	0.85358	3.24948	2.33969	1.95275	1.47405	0.816175	6.47194	1.18185	1.47269	0.865239	0.729278	0.950119	1.24687	2.38234	0.643785	0.477147	2.33124	0.82955	0.774136	0.838144	2.49138	1.11866	1.05904	0.933304	1.02917	1.51691	1.67734	0.688156	1.01096	0.420542	1.2603	0.523637	1.96965
1192	1.31489	0.845984	1.04686	0.715823	0.706685	1.06908	0.595201	2.64036	0.987551	0.921842	1.34158	0.559889	1.08218	1.24615	0.686208	1.29763	1.64743	1.24612	0.8844	0.810861	0.792617	0.674344	0.833941	1.993	1.17392	0.996395	0.924493	1.13283	0.843901	0.706981	0.963067	1.05348	1.2242	1.41189	1.08315	0.680386	1.25388	0.771713	0.884149	0.664933	0.955911	1.58758	1.10603	1.39078	0.678333	0.435284	1.27632	0.780476	0.907829
1193	0.974834	1.70839	0.899527	1.82736	1.4979	0.765906	1.31649	0.803761	1.14814	0.906473	1.83324	2.05565	1.0884	0.94869	1.16448	3.12699	0.748831	1.30254	1.23328	1.12489	1.57555	0.911127	1.71349	1.58863	1.95026	1.92791	0.720261	0.981593	2.54637	0.861376	1.39744	1.76448	3.30511	1.09242	0.775626	1.43292	1.54873	1.08327	1.1503	1.10694	1.06811	1.26522	0.961374	0.875931	0.99644	0.543868	4.88817	0.778802	1.54158
1194	1.87598	1.37862	1.51188	1.69344	1.47285	1.91558	1.12544	2.52312	1.34689	1.64234	1.74214	0.915299	1.02088	1.44438	1.04862	1.36877	1.70417	2.08223	1.39717	1.45587	1.16651	0.639834	0.918581	2.60568	1.82295	1.29823	1.13617	2.18997	1.67351	1.29349	1.25724	1.15448	2.03087	1.96846	1.32977	1.31262	1.55524	1.05203	0.979413	0.818925	1.01464	2.41486	1.47432	1.57254	1.06893	0.812353	1.38572	0.644109	1.39332
1195	1.69625	1.24386	1.75682	1.1451	1.11094	1.45787	1.16802	2.82841	1.05808	1.63962	1.56194	0.874162	1.19934	2.31798	0.63911	1.35118	1.6818	1.92317	1.59637	1.19162	0.917645	0.691022	1.00573	1.75489	1.42617	0.994407	1.27015	1.90964	1.27413	1.25007	1.21445	0.868954	1.92561	1.65592	0.856235	1.03415	1.85209	0.949525	0.99747	0.798123	0.867943	1.95499	1.11398	1.51371	1.08184	0.5913	1.95283	0.630512	1.27618
1196	1.2054	1.16327	1.66108	0.919936	1.11327	1.25257	0.999486	2.08807	1.23764	1.33835	0.885337	0.624303	0.85473	1.13144	0.658117	1.02311	1.16448	1.68207	0.893287	1.1084	0.928991	0.588064	0.862141	1.6176	1.28868	1.16017	1.1126	1.20692	1.10945	1.23184	0.939432	0.752062	1.20435	1.5553	1.1438	1.15221	1.11238	0.83484	0.7125	0.758948	0.868413	1.78042	1.1154	1.25076	0.768145	0.605375	1.32541	0.690192	1.16647
1199	1.40699	1.06613	1.9159	1.14432	1.25803	1.15259	1.24725	2.70247	1.29465	1.76125	1.57463	0.733797	1.0775	2.09436	0.971113	1.5405	1.36515	1.86266	1.63703	1.10921	1.01323	0.968558	1.08216	1.99638	1.45656	1.03702	1.39634	2.04204	1.09762	1.41927	1.15036	1.14376	1.97382	2.5113	1.19544	1.33419	1.97683	0.956069	1.03402	0.843662	0.931895	1.7566	1.33659	1.42008	1.02217	0.695784	2.58965	1.3132	1.43984
1200	1.29447	0.887165	1.82749	1.2847	1.36207	1.12684	1.08984	1.82295	1.13901	1.37674	1.40188	0.506144	1.01501	1.28782	0.661886	1.35996	1.97612	1.83217	2.05653	1.38363	0.794229	0.540329	1.0996	1.72285	1.16429	0.90594	1.1638	1.74032	1.1192	1.30292	0.983355	0.855718	1.26137	2.6741	1.09327	1.11351	1.68605	0.976084	0.781908	0.759661	0.800808	1.55351	1.21322	1.30406	1.17983	0.603072	2.28204	0.509512	1.31325
1201	0.688861	1.05783	1.05669	1.25486	1.24764	1.31674	0.889536	0.929621	0.938271	1.22483	0.941665	1.52393	1.16687	1.276	1.5651	1.37084	1.16815	0.64694	1.26617	1.36887	1.00711	1.31713	0.916293	1.24059	1.04466	1.32281	1.18914	0.790462	1.11268	1.21043	1.01458	1.36014	0.766369	1.03888	1.2191	0.695404	1.01787	1.08842	1.00399	1.15217	1.36585	0.95285	1.04758	0.837934	1.44605	1.23849	0.934259	1.31994	0.995661
1202	1.93719	1.07057	1.92895	1.68371	1.16829	1.68239	1.1881	3.02355	0.839693	1.97496	1.86725	0.834325	1.39312	1.81075	0.930677	1.33234	2.01262	2.49486	2.2984	1.52189	1.09627	0.765105	0.953273	3.26596	1.36502	0.849483	1.19614	1.67674	1.69734	1.44036	1.30093	1.05048	1.99481	2.63722	1.12007	0.660837	1.7801	1.17637	0.998172	0.804411	0.986577	2.76433	0.981625	1.76983	0.913461	0.837388	0.943979	0.624184	1.3247
1203	0.997105	0.58572	1.15016	0.899159	0.766612	1.0973	0.913777	1.50347	0.616218	0.970664	0.710666	0.429719	0.725176	1.03605	0.468916	0.657786	0.587503	1.02205	0.974393	0.653482	0.878098	0.584762	0.76715	1.47337	0.804754	0.514672	0.635731	1.08357	0.768089	1.13024	0.58275	0.501923	1.0886	0.786163	0.555531	0.56221	1.23064	0.730318	0.711384	0.55003	0.816368	1.2017	0.764322	0.700749	0.604142	0.574085	1.44667	0.401154	0.588803
1204	0.74885	0.945118	1.13127	0.803545	0.858984	1.22827	1.21943	1.0062	0.719183	1.28848	0.848744	0.592725	0.690134	0.678581	0.867057	0.693204	0.831521	0.886395	0.897664	1.0681	1.26259	1.14238	1.58656	0.943381	0.69071	0.947728	0.875704	0.863385	0.798703	1.09927	0.83631	0.823598	1.04634	1.07141	0.756129	0.578528	1.09207	1.05708	0.80175	1.05686	1.00184	1.23077	0.90026	1.08593	0.680939	0.536318	1.15886	1.15843	0.812288
1205	1.1578	0.949589	1.42433	0.915179	0.86661	1.15061	0.863177	2.06593	0.980066	1.30638	0.951561	0.497167	0.688531	1.07187	0.622142	0.86556	1.10188	1.49103	1.32636	1.0344	1.12827	0.683457	1.60851	1.70633	0.955932	0.940713	0.893594	1.19913	1.02642	1.11838	0.980738	1.07939	1.45683	1.26625	0.866348	0.806452	1.27629	0.789058	0.744417	0.812148	0.833214	1.73192	1.41216	1.03324	0.735648	0.497528	1.33891	0.749497	1.22193
1207	0.818677	1.02793	1.27449	0.763984	0.78768	1.22148	1.03025	2.02497	0.87271	1.60257	0.754977	0.516827	0.598825	0.719351	0.840472	0.696095	1.11109	1.02755	0.77376	1.11963	1.10558	1.11001	1.83556	1.28904	0.824328	0.999531	0.937658	1.0113	0.725862	0.653866	0.995648	1.03182	1.13282	1.04815	0.835632	0.632729	1.12673	0.8083	0.824395	1.00114	0.999791	1.43334	1.40242	0.932476	0.584353	0.507109	0.942431	1.06328	1.17845
1208	1.27312	0.903443	1.43027	1.12153	1.04277	1.09472	0.961448	1.5568	0.903984	1.4127	1.02057	0.537396	0.937696	1.22326	0.579348	0.849993	1.00656	1.05235	1.15402	1.08266	1.12256	0.72617	0.715412	1.8093	1.15272	0.912606	0.927936	1.23059	1.10951	1.6879	0.825875	0.660672	1.61156	1.20077	0.756089	0.886796	0.842735	0.783599	0.664919	0.71342	1.02704	1.4029	1.14357	1.01643	0.792017	0.624313	1.77266	0.396591	0.74885
1210	1.01513	2.33021	2.51448	1.22432	1.06014	1.1483	1.4366	1.01074	0.894011	0.990587	0.790334	0.786334	0.69154	2.21048	2.09161	1.09104	0.846759	0.501714	0.902671	1.1958	1.1053	0.723937	1.30009	1.10517	0.854969	3.16917	0.980909	1.54493	0.443646	0.579918	1.74113	0.92336	0.76286	1.01603	1.02488	0.65867	0.958717	1.06685	0.969665	0.984198	1.41437	1.23054	1.24105	0.965908	2.03483	1.73551	4.79961	1.44657	0.695795
1214	1.19468	0.971123	1.68046	0.992246	1.16095	1.16568	0.90907	2.09889	1.12608	1.09462	0.863724	0.556489	0.931622	1.35272	0.590949	1.33222	1.30424	1.39289	1.19662	1.02524	0.961883	0.620909	0.983434	1.44092	1.07754	1.05655	1.00361	1.31264	1.16618	1.16481	1.03993	0.904079	0.959535	1.33028	1.06011	0.979404	1.34127	1.07875	0.710557	0.807201	1.17484	1.25997	1.17486	1.09757	0.655755	0.590637	1.82024	0.586882	1.2219
1218	1.04997	0.966779	1.07042	1.66563	1.62727	1.55954	0.780382	1.27316	1.32811	1.27021	1.16608	1.64461	1.99831	1.51094	1.95216	0.912974	1.41275	0.828428	1.99727	1.64867	1.55596	1.13361	0.995839	1.25335	1.33571	1.04156	1.37791	1.37428	1.63669	1.29065	0.991447	1.01474	1.22149	1.5157	1.20421	0.90553	1.33113	1.16862	1.15728	0.933307	1.79248	1.33787	1.15297	1.21056	2.01614	1.42993	1.75638	1.48654	1.02797
1224	0.898995	0.925748	1.22864	0.87229	0.885155	0.729214	1.13307	1.0861	6.2749	0.853308	1.10319	0.711414	0.965179	0.828221	0.493106	0.641624	0.943646	1.71354	1.0824	1.20638	2.17096	1.08348	1.70644	1.29914	3.06464	1.18296	1.20177	0.946538	0.906453	1.70506	0.882491	0.666331	7.87023	0.84632	0.907607	0.78814	2.75566	1.52447	1.14945	0.853944	0.906973	1.7512	3.04066	0.791621	0.733473	0.411573	1.28938	0.933803	1.12129
1225	0.864123	0.609259	0.636724	0.53444	0.466178	0.548355	0.545293	1.27416	0.951576	0.702607	0.601792	0.596062	0.564196	1.00815	0.864055	0.828684	0.873371	0.541747	0.430354	0.662449	0.52703	0.617583	0.799383	1.14586	0.618701	1.21236	0.612881	1.52176	0.667626	0.508888	1.17187	0.793831	0.772195	0.569173	0.81266	0.663477	0.602119	0.716775	0.814333	0.652386	0.724473	0.91669	0.701331	0.806849	0.64529	1.65275	1.65282	0.695326	0.651198
1226	0.661223	0.474833	1.0795	0.656845	0.529981	0.794084	1.47274	0.694518	3.32854	0.539707	0.575364	0.404877	0.580728	0.419067	0.656546	0.50814	0.769841	2.04922	1.0511	0.901162	1.45919	0.503452	0.777918	0.792685	2.56552	0.565428	0.59893	0.485979	0.50334	1.30356	1.08987	0.528547	3.64786	0.748903	0.404899	0.453575	1.29957	0.84432	1.04296	0.85749	0.501616	0.72388	1.68528	0.594704	0.424071	1.0006	0.773768	0.514595	1.11042
1228	0.887262	0.887622	0.730991	0.811568	0.664484	0.702257	0.893937	1.37048	1.20636	1.03397	0.65804	0.906961	0.807343	1.38488	1.31302	1.17032	0.978498	0.789432	0.908029	0.959783	0.815595	0.88475	0.952228	1.15145	0.776258	1.81729	0.943085	1.75575	0.99811	0.780186	1.60961	1.02372	0.81634	0.64377	1.27617	1.01431	0.668056	1.64983	1.23201	0.860205	1.09774	0.981688	0.890691	0.870495	1.05408	2.28867	2.31706	1.00952	0.698829
1236	0.823349	0.521745	0.577142	0.531383	0.407502	0.497684	0.426453	1.12505	0.77426	0.610472	0.560754	0.547748	0.637966	0.8193	0.64635	0.675628	0.913918	0.506253	0.376467	0.548306	0.485465	0.400511	0.723407	1.07228	0.544237	0.925011	0.579873	1.3626	0.518552	0.549404	1.04504	0.631651	0.777386	0.582454	0.631481	0.552311	0.554344	0.513781	0.554181	0.468936	0.585778	0.916313	0.642162	0.700167	0.487988	1.28344	1.13068	0.526186	0.657332
1238	1.21645	1.01547	1.32224	1.21912	0.896898	1.02114	0.883081	1.2204	1.11567	1.00929	1.07918	1.05221	0.75768	1.84208	1.16537	1.22201	1.08174	1.19671	0.878177	0.902659	1.32156	1.70869	1.06021	1.16293	0.949713	1.37995	1.07684	1.39864	1.02031	0.756356	1.25944	1.14315	1.02272	0.815239	1.33066	0.800258	0.846207	1.06436	1.33375	0.964441	1.43517	0.866739	0.822109	1.04832	1.03465	1.25695	1.38632	1.00712	1.04969
1241	1.0494	0.862457	0.977896	1.28175	0.987512	1.03199	1.05056	0.844854	0.978068	1.07958	0.912264	0.945408	0.975484	1.31522	1.07831	1.07565	0.940519	0.936153	0.847877	1.12362	1.06352	1.5064	0.81481	0.646443	0.752891	1.26316	0.850679	1.11318	0.926093	0.71631	1.32277	0.848403	0.793146	0.983605	1.01666	0.768453	0.911284	1.44236	1.45644	0.861814	1.33384	0.930921	0.852763	0.95307	0.842119	1.25459	1.48883	1.99633	0.873083
1245	0.946372	0.859778	0.720013	0.871276	0.643718	0.614013	0.912186	1.37898	1.08772	1.02667	0.647618	0.935517	1.15917	1.18117	1.11047	0.948775	1.05921	0.843616	0.981283	0.930848	1.04663	0.706467	0.703296	1.02572	0.888162	1.90006	0.955935	1.85961	0.915256	0.940565	1.26224	0.768822	0.84462	0.680179	1.22785	1.00283	0.732131	1.67359	1.0623	0.663452	0.82913	1.05963	0.953457	0.782536	0.944014	2.40376	2.16817	0.818499	0.705816
1246	1.13935	0.849676	0.787927	1.04906	0.949857	0.966329	0.533355	1.38883	0.806313	1.27795	1.1879	1.12017	1.35334	1.21581	0.829798	1.10628	1.25886	0.979014	0.684378	1.00302	1.18465	0.884908	1.36464	1.18386	0.815673	0.94258	0.912091	1.2917	1.02972	0.901188	0.984039	1.49758	0.805463	0.795086	1.22965	1.10653	0.969655	1.19991	0.958006	0.94697	0.732259	1.0633	0.866922	0.986242	1.08385	1.0576	1.05938	2.08297	0.784579
1249	0.677096	0.771755	0.76559	1.26679	0.734583	0.832158	0.721231	1.1672	0.765841	0.96962	0.758487	1.07598	0.947359	0.880876	0.74873	1.08833	0.942294	0.665833	0.986561	0.856605	0.645949	0.807563	1.04603	0.975957	0.74576	1.00235	0.934685	0.771808	1.03396	0.67265	0.908379	1.31091	0.662114	1.03637	0.775781	0.683987	0.650656	0.73658	0.778354	0.982026	0.687367	1.22166	1.00951	0.913883	0.843624	0.871876	1.24222	1.42537	0.954496
1253	0.850116	0.936129	0.904261	0.85341	0.960196	0.843008	1.04475	1.31135	1.1781	1.04895	0.793031	1.01194	1.0812	1.32758	1.4695	1.16461	0.907839	0.797165	0.999122	0.958726	0.91253	1.20016	1.14551	1.16765	0.865615	1.70398	1.02452	1.46915	0.980637	0.887187	1.42799	1.44343	0.847199	2.6378	1.24504	0.946944	0.750419	1.3595	1.36648	1.0384	1.1541	1.01699	1.02006	0.941165	1.2489	2.08722	1.65463	0.930058	0.742362
1255	0.78774	0.945395	1.1094	1.65393	0.858684	0.90642	0.71292	1.19641	0.811673	0.98947	1.0684	1.14541	0.964662	1.12635	0.692782	1.4619	0.906499	0.777671	1.1388	0.80036	0.762848	0.727009	0.691582	1.15034	0.918953	1.23529	0.864886	0.959362	1.11706	1.41431	0.928784	1.08169	1.07261	1.0382	1.00034	0.720294	0.788911	0.851243	0.786707	0.950708	0.635831	1.26998	1.02889	1.07415	0.896219	0.728017	1.24086	1.57649	0.929888
1259	0.908063	1.02293	0.691981	1.93304	1.07719	0.755318	0.879188	1.27408	0.827374	1.0104	1.01604	1.46401	1.38627	1.2612	0.956183	1.19708	0.860941	0.687387	1.21996	0.991441	0.752242	1.03159	0.942012	1.22888	0.851705	1.28346	1.17631	0.993142	1.35298	0.786863	1.20972	0.957686	0.932281	1.51534	1.01487	1.0105	0.833361	0.935151	0.932563	0.811483	0.890751	1.33772	1.03796	1.15215	0.960786	0.975191	1.05397	1.14415	0.893743
1261	1.12595	1.13198	1.67189	0.948631	0.825823	0.755005	0.926642	1.32243	0.968411	1.06702	0.976129	0.544913	0.79266	1.27222	1.00184	1.00848	0.947256	0.757187	0.452968	0.773832	0.879341	0.897381	0.985147	1.80113	1.21426	1.40423	0.951152	1.25168	0.72214	1.32502	0.892719	0.840576	0.892492	1.04721	1.22713	0.876512	1.0392	0.621879	1.02489	0.597302	0.828212	1.40292	0.993547	0.951674	0.666017	0.952265	1.01889	1.80346	1.24324
1266	0.909266	0.69185	0.939653	0.961633	0.688517	1.26182	0.690447	1.91399	0.960395	1.17487	0.704723	0.903863	0.782106	0.84201	0.899452	0.690206	1.61234	1.02933	0.78952	0.872536	0.954595	0.846367	1.67313	0.942398	0.732571	0.864449	0.760508	0.738977	0.665019	0.748685	0.663536	1.31136	0.73195	1.05507	0.681092	0.642731	0.65977	0.914896	1.12972	0.744206	0.793815	0.976728	1.3261	0.76706	0.74198	0.947085	1.25467	0.88962	0.941251
1270	0.579035	0.668873	0.680406	0.773761	0.720847	0.646836	0.959421	0.857303	0.753087	0.729219	0.645588	0.543162	0.550516	0.868152	0.352896	0.671524	0.786039	1.17612	1.04132	0.597459	0.549029	0.733587	0.957616	0.92002	0.928875	0.805234	0.886441	0.879658	0.793326	0.847608	1.01957	0.885095	0.741374	0.938207	0.749467	0.705754	0.67218	1.15504	0.646239	0.704982	0.722094	0.73859	0.855642	0.765757	0.632105	0.737797	0.993924	0.891479	0.709101
1278	0.982323	0.988769	1.03026	1.10036	0.984188	0.960791	1.04964	1.06946	1.01653	1.13578	0.892272	1.08112	1.01109	1.17531	1.18022	1.09866	1.13393	0.785319	0.859271	0.992238	0.78704	1.16268	1.3415	1.075	1.08961	1.08697	1.07214	0.884005	0.981442	0.688995	1.06498	0.836495	0.829648	1.05738	1.03413	1.04457	0.985749	1.07404	1.23637	0.779982	1.14229	1.12673	1.14024	0.961782	1.08374	1.29345	1.08687	2.16071	0.974346
1279	0.487906	1.01577	0.73273	0.94828	0.814767	0.927867	1.13423	0.80248	0.740478	1.27397	0.809488	0.998414	1.15037	1.25642	1.08328	1.31369	0.77634	0.59292	0.801387	0.815087	1.15618	1.54191	1.43892	0.903138	0.796149	0.969929	0.920377	0.825556	0.667959	0.890993	0.868426	2.35334	0.450082	0.670764	1.18749	0.794106	0.809777	1.07931	1.7296	1.10678	1.40472	0.658104	0.691279	0.801657	0.864912	1.04618	1.14508	1.19375	0.723657
1280	1.38948	1.815	1.72669	1.61705	1.31696	1.24031	0.667567	1.30672	1.26284	1.75997	1.46579	0.846099	1.08872	1.4962	0.816968	0.827652	1.50801	0.593269	0.512328	1.3183	1.40873	1.32371	1.20109	1.7141	1.63749	1.90157	1.77426	1.67317	1.25788	0.702942	1.01398	0.692829	1.42158	1.53565	1.83393	1.38499	1.39049	1.00104	1.17239	0.623176	1.67413	3.19055	1.27424	1.33181	1.17748	0.625523	0.72196	0.850363	1.18922
1285	0.733195	1.22907	0.984815	1.10169	1.11577	0.967221	1.17875	0.941366	1.14097	1.02205	0.882373	1.35654	0.908433	1.50839	1.71882	1.18155	0.642087	0.842109	1.08593	0.824044	0.797512	1.33338	0.925626	0.830687	1.33736	1.1087	0.978294	0.725956	1.09518	0.924576	1.2621	1.40431	0.902358	1.04259	1.11253	0.98046	1.0103	1.18721	1.09212	1.64921	1.47178	0.671883	0.940329	0.811581	1.0446	1.12451	1.1762	1.46558	0.849998
1288	0.803921	0.895104	0.847553	0.913841	0.783049	0.761686	1.05931	0.83193	0.943357	0.964541	0.90655	1.05198	0.818163	0.985697	1.48439	1.31193	0.698085	0.969327	1.07424	0.952172	0.714295	2.01905	1.85042	1.06859	0.793334	1.12005	0.905966	0.736731	0.959574	0.982747	1.38708	2.92027	0.774441	0.860329	0.97179	0.929983	0.777856	0.722289	2.89179	1.44265	1.49339	0.875229	0.771881	0.946379	0.962039	1.133	0.943586	1.76124	0.781498
1295	0.850296	1.04344	1.05474	0.885944	0.889755	1.02264	1.29394	1.21621	1.13999	1.23603	0.936334	1.2789	0.885527	1.17545	2.35277	1.05859	1.02966	0.933662	1.05061	0.874364	0.867043	0.943727	1.09367	1.18912	1.05748	1.20219	1.21224	1.06105	0.886278	0.864245	1.17148	1.05661	0.801248	0.947083	1.4146	1.2307	1.01114	0.887647	0.946711	0.982729	0.8688	0.849707	0.97578	1.1596	0.884136	0.997202	1.11363	1.43296	0.822222
1298	0.60875	0.969628	0.840938	1.28857	1.93352	1.222	0.960833	0.551053	0.956898	0.81363	0.889868	1.12402	0.942624	1.05272	0.973467	1.04244	0.520836	0.532861	0.944467	0.703504	1.07951	1.46763	0.689933	0.705185	1.57828	1.0287	0.934361	1.30103	1.0444	0.723892	1.38979	1.24612	0.433403	1.06521	0.856983	0.911814	0.935129	0.935584	0.816345	1.0627	0.981111	0.703564	0.772319	1.23872	1.28567	1.0727	0.964918	1.20619	0.60091
1299	0.893151	1.11634	1.26259	1.27426	1.06179	1.01517	0.932961	1.35952	0.878589	1.141	0.863274	0.892094	1.21947	1.1265	0.918669	1.08082	0.86518	0.959842	0.744248	1.0452	1.03733	0.806765	0.799921	1.18838	1.19249	0.999752	0.876961	1.16273	0.863551	0.798799	1.12102	0.933603	0.856352	1.09991	0.80244	1.18429	1.11878	0.821292	0.810925	0.748328	0.834193	1.12536	0.933835	0.870597	0.849349	0.728673	0.823285	0.914812	0.963096
1300	1.39621	1.50768	1.90563	1.98119	1.50937	1.57383	1.2899	1.64375	1.93363	1.47817	1.86653	1.92015	1.66697	1.86227	1.99745	1.87816	0.816501	1.30082	1.48521	1.44208	3.24993	1.17912	2.16095	1.87235	1.40531	2.27058	1.20647	1.24902	2.30081	2.97908	1.31518	1.52897	2.44738	0.958023	1.37104	1.19509	1.97865	0.87063	0.624994	1.33893	1.38614	1.24921	1.38815	1.43705	1.39457	1.16896	1.22668	1.09554	1.23087
1301	0.718173	1.06842	1.14815	1.14917	1.04151	1.28701	1.37521	0.91806	1.95058	1.12499	0.920537	0.979224	1.2094	1.01385	0.881636	1.16282	0.76931	1.84264	3.89625	4.45262	1.49648	1.02489	1.15244	0.832197	1.86295	0.950413	1.02217	0.902399	0.798286	3.88461	1.02853	1.24751	2.46803	0.86422	0.91413	0.94531	1.85672	0.917624	0.728288	1.20254	0.989163	0.860513	1.66891	0.847204	1.0088	1.16073	1.36729	1.54258	1.69449
1302	0.920644	1.1078	1.09576	1.03227	0.942064	1.04009	0.570594	1.88748	1.09089	1.60887	0.844937	0.809844	0.744933	1.5862	0.782368	1.02013	1.11344	1.10562	0.925328	0.991857	1.30868	0.878243	1.11641	1.41051	0.937335	1.79739	1.23211	1.42669	1.03056	0.693046	1.54143	1.39261	0.884204	1.25293	1.41852	0.887844	0.930769	1.22106	1.72833	0.879985	1.02522	1.29362	1.21999	1.18166	1.12985	0.797427	1.29718	0.832546	1.02563
1303	0.687972	1.31725	0.816862	1.11128	1.05432	1.20306	1.16467	0.822221	0.96596	1.02972	0.788937	1.10588	1.09319	0.952893	0.896712	0.966786	0.763471	0.813461	0.916547	0.827867	0.797936	1.30601	0.81339	0.924533	0.729433	1.07624	1.19806	1.01951	0.656036	0.967703	1.03569	0.979634	0.68137	1.03367	1.27775	1.06621	0.915006	1.03082	0.994578	1.02021	1.13328	0.800589	0.79641	0.692496	0.830387	0.942362	0.773519	1.18595	0.653488
1307	0.942592	1.91427	1.91913	1.52826	1.23414	1.25399	1.35147	2.17321	1.19066	2.2928	1.28232	1.47754	1.50968	1.71622	1.37641	2.81158	1.16438	1.24085	1.43437	1.32951	0.954297	1.44045	1.53626	1.04709	1.23044	2.79208	1.63405	1.08988	1.51168	1.175	1.60681	1.81466	1.18988	1.33118	1.81042	1.01675	1.23409	1.48105	0.87378	1.23998	1.46559	0.988981	1.19584	1.22127	1.20785	1.25214	1.01954	2.15798	1.09077
1308	0.586889	1.2471	0.893178	1.02209	0.837943	0.861863	0.892642	0.970893	0.613565	0.902465	0.718028	1.01166	1.11035	1.03818	0.908672	0.857992	0.706998	0.663291	0.792032	0.766741	0.725906	0.845463	1.07558	0.939836	0.958656	1.00171	1.00159	0.797976	0.739756	0.900099	0.602124	0.735645	0.678288	0.802465	0.720744	0.998638	0.921798	0.68038	0.979709	1.1073	0.847165	0.744227	0.795822	0.673343	0.877688	1.0446	0.900206	0.969273	0.821024
1309	0.801811	0.986367	0.955481	0.76436	0.896602	0.810364	0.856413	1.44376	1.03386	1.20429	0.925624	0.555232	1.2641	3.22786	0.590545	1.34294	0.93399	0.843526	0.812063	0.634069	1.37608	1.13169	1.105	1.26412	0.846445	1.37951	0.926709	1.27874	0.62098	0.759946	1.00427	1.4251	0.960634	1.02373	0.920755	0.985847	0.890514	1.26451	0.666647	1.02564	0.765812	1.26011	1.03705	0.871746	0.833946	0.684508	1.51755	0.99828	0.795718
1312	1.01765	1.59218	1.19667	1.36852	1.27253	1.42544	0.701309	1.7855	1.09906	1.77698	1.41462	1.42882	1.51601	1.66493	2.41914	1.30104	1.27313	1.06811	1.27149	1.25383	1.03703	1.6957	1.26571	2.00475	1.04705	1.9128	1.52287	1.43548	1.19176	0.937482	1.66321	1.21844	0.704583	1.7473	1.67003	2.04943	1.02937	1.18605	1.21754	1.02379	1.43225	1.42454	1.14041	1.33846	1.20178	1.21411	1.46659	17.9402	0.737925
1313	0.641065	0.946751	0.929794	1.29738	1.24879	1.00918	1.28833	1.2236	1.06785	1.04101	0.849812	0.918458	0.93435	1.65226	0.671442	1.25554	0.789211	0.788781	0.933436	0.721193	1.04258	0.910304	0.838617	1.18858	1.28252	1.12179	0.862112	1.14884	0.864008	0.865792	1.2284	1.03841	0.684429	1.18322	0.89048	0.729798	1.00389	0.886206	0.811825	0.954479	0.932403	0.921342	0.868172	1.09607	0.824303	0.824462	0.881581	1.23148	0.975335
1315	0.775638	0.840593	1.51826	0.890938	0.763035	0.999308	0.853536	0.952014	0.798419	0.956208	0.833971	0.881681	0.816886	1.24129	0.738913	0.887046	1.16561	0.732309	1.29714	1.08577	1.81294	0.94296	1.32678	0.871752	1.06771	0.829695	0.942569	1.33388	0.687098	1.3176	1.2822	0.876856	1.23704	0.915817	0.942022	0.678538	1.27611	1.47222	1.03497	1.07706	0.989347	0.875558	0.784778	0.676848	0.748145	1.06638	0.949133	0.986893	0.847582
1316	0.588104	0.649524	1.02884	1.26184	0.954848	1.18681	1.14661	0.654933	2.02926	1.0152	0.971082	1.07384	1.44872	1.13194	0.918078	1.24621	0.481674	2.02575	1.2197	1.28314	1.69464	0.951843	1.49174	0.865004	1.27268	0.83764	0.907446	0.715017	0.798506	1.31604	1.17551	0.876617	0.629472	1.17361	0.845495	0.787609	3.38123	1.67139	2.36152	0.80025	0.765205	0.626154	0.422696	0.730506	1.65064	1.13267	0.966595	1.43272	1.08741
1321	1.21572	2.20248	1.15663	1.28062	1.26076	1.54991	0.973137	2.33971	1.12706	2.57314	1.4032	1.46053	1.53967	1.82095	2.5197	1.70257	1.2894	1.1876	1.3675	1.19472	1.13196	1.73123	1.11417	2.0529	1.10079	2.8684	1.7318	0.970007	1.38194	1.03464	1.57616	1.64264	1.13241	1.85967	2.01204	1.92318	1.21865	1.73937	1.06018	1.21667	1.64111	1.6367	1.11562	1.57438	1.1937	1.20793	1.20451	0.497576	0.8079
1322	0.851581	1.16713	1.03189	1.00786	0.930153	0.996408	1.18468	1.05767	1.22638	1.07314	1.07221	1.243	1.01746	0.909658	1.16425	1.02716	0.943652	0.921052	0.967341	1.1504	0.97139	1.22593	1.05653	1.32148	1.20109	1.26889	1.11616	0.97644	1.15991	0.863151	1.04825	1.23947	0.93527	1.134	1.19039	1.05952	1.10113	1.21321	1.16994	1.19121	1.18713	1.05902	1.12617	1.10121	1.25413	1.4037	1.09827	1.29328	1.11903
1324	0.772461	0.574108	0.806355	0.618399	0.727646	1.46921	0.742333	0.889264	0.852251	1.02266	0.637012	0.582864	0.88429	0.898307	0.947361	0.797015	0.55335	0.709227	1.5144	1.00687	0.941066	0.661861	0.667796	0.9627	0.494193	0.558	0.506639	1.25347	0.569482	1.57223	1.12031	1.28848	1.39389	1.08349	0.594936	0.728205	0.942895	1.26254	1.09455	1.117	1.23083	0.431385	0.745011	0.728315	1.31971	0.80028	0.832953	1.07848	1.08938
1328	0.682917	0.944933	0.892222	0.822778	0.80893	0.991859	0.754907	0.685637	0.773534	0.901379	1.03382	0.878264	0.993969	0.860725	0.842213	0.919735	0.514302	0.658781	0.805822	1.09198	0.960774	0.721989	0.62393	0.659013	0.810078	0.85899	0.751865	1.29557	0.619338	1.2358	1.21958	0.683102	0.614483	0.853851	0.716152	0.813658	0.98943	1.29935	1.10383	1.08754	1.07737	0.450392	0.728401	1.02151	1.22502	1.07324	1.06925	0.992653	1.10245
1329	1.06288	1.78169	1.28814	1.43736	1.37707	1.18119	1.47559	1.20391	1.56374	1.20437	1.12913	1.3107	1.17581	1.78573	1.99404	1.51599	1.15901	0.601189	0.597525	1.47328	1.24305	0.859848	1.0924	0.94482	0.975708	1.20405	1.26808	0.755585	1.0305	0.973785	1.01903	1.47423	1.00176	0.676484	1.57691	1.56316	1.07911	0.800013	0.761184	1.7039	0.987445	0.707053	0.739396	1.16669	1.37778	2.07368	1.53869	1.62708	0.773855
1330	0.894218	1.07176	1.0313	0.815777	0.701299	1.10956	1.1164	1.0524	0.892911	1.16369	0.898051	1.09777	0.972186	0.992159	2.79145	1.23623	1.04347	0.791698	0.799253	1.01315	0.982701	1.18818	0.956622	0.96201	0.91875	1.1109	1.07714	0.785409	0.716399	0.785299	1.24893	1.08318	0.915641	0.637377	1.16471	0.96513	1.00502	0.961362	1.35468	1.08647	1.08562	0.809036	1.03533	1.38459	0.834376	1.05773	0.939195	1.31352	0.751308
1331	0.696385	0.879325	1.12271	0.988491	1.04331	0.9657	0.971999	0.882448	0.740858	0.991019	0.901578	0.939911	1.10341	1.28786	1.01597	1.132	0.645023	0.766215	0.968342	0.821122	1.08346	0.806905	0.725819	0.710342	0.917986	1.00805	0.721584	0.770547	1.19149	1.13533	1.26989	0.938184	0.689241	0.78526	0.822979	0.680842	0.876565	0.748383	1.00814	1.13201	0.788408	0.75581	0.90767	1.04712	1.0746	1.07314	1.15434	1.45908	0.687803
1333	1.43328	1.90368	2.81384	1.91173	2.93976	2.39358	1.45031	1.37939	1.81859	0.978184	1.73344	2.28266	2.29956	1.5615	1.79138	1.65897	1.06875	0.68097	0.819712	2.49984	2.46194	1.34429	1.04716	0.855485	0.779707	1.04739	1.32468	0.695195	1.72364	0.673304	1.01695	1.99332	0.699475	0.750817	1.36528	2.13512	0.988177	0.841812	0.818352	1.41938	1.42805	0.694446	0.77028	2.17752	2.14069	2.98058	1.94834	2.06232	0.602185
1334	0.67779	1.06297	1.20878	1.43387	1.24596	0.918627	0.818349	1.03061	1.43953	1.46644	0.79358	1.15913	1.02996	2.21492	0.597873	0.902732	0.573552	1.86862	2.40873	0.984945	1.40263	0.82901	1.29851	0.723006	0.79301	2.02113	0.850073	1.58638	0.874775	1.81236	1.57832	0.645147	1.17582	0.912025	0.99341	0.990688	2.77656	0.846312	0.754155	0.953151	0.848043	0.681771	0.744477	0.781021	1.02163	1.7146	1.45459	2.4398	1.0798
1335	0.760305	1.26607	0.966908	1.03767	0.998437	0.909101	1.16202	1.22554	1.14698	1.7099	1.0418	0.835651	0.853539	1.46307	1.46303	0.89356	0.92606	1.05549	1.05693	0.918046	0.613931	1.32034	1.00105	1.24088	1.23809	1.63435	1.38867	0.825297	0.703972	0.737429	1.80462	0.967746	0.415882	1.18767	1.64848	1.46426	0.665094	1.30912	1.11799	1.08607	1.60435	0.805127	1.00799	0.88748	0.897943	1.01301	0.948126	0.977026	0.638238
1336	0.864148	0.582307	0.863565	0.561565	0.663837	0.710441	0.644517	0.890713	0.866989	0.689275	0.842471	0.833333	0.685629	0.697527	0.847886	0.788529	0.918536	0.6369	0.428912	0.667528	0.612559	0.772083	1.01145	0.956057	0.804921	0.6492	0.636517	0.738903	0.660253	0.700365	0.789676	0.962834	0.851483	0.78438	0.633702	0.6756	0.749465	0.457473	0.830327	0.749524	0.840838	0.805539	0.880721	0.939553	0.687052	0.731056	0.586313	0.86477	0.865345
1337	0.68582	1.43157	0.996304	1.16701	1.19899	0.968969	0.800931	1.41542	1.28924	1.48193	1.1474	0.972336	1.23092	1.44502	1.802	0.979733	1.02036	1.03233	1.18961	1.02301	0.805656	0.899772	1.08276	1.40023	1.22728	1.82031	1.7641	0.722801	0.857189	0.862338	1.81775	0.545388	0.477724	1.40994	2.05089	1.53257	0.775327	1.0541	0.81606	1.4231	1.43619	0.941271	1.09953	1.12606	1.06833	1.10372	1.53711	1.17644	0.57357
1338	0.747281	1.02272	0.918608	1.00666	1.0012	0.86654	0.982562	0.796137	0.948867	0.908405	1.00056	1.23192	1.22754	0.874749	1.01586	1.0242	0.781778	0.721056	0.889153	0.941876	0.970797	1.02041	0.861793	0.910218	0.911951	0.850645	0.864614	0.831726	1.06528	0.792612	0.914119	1.18071	0.805701	0.854708	0.972941	0.941878	0.940126	0.90547	1.10274	1.01287	1.00429	0.786205	0.914225	1.05541	1.21068	1.12653	0.926377	1.07171	0.79938
1341	1.02374	1.373	1.30525	1.22899	1.14122	1.12847	1.09799	0.91871	1.20549	1.15888	1.13439	1.37287	3.77938	1.19249	1.00852	1.04747	1.04585	1.00926	1.51284	1.19199	2.7223	1.07057	0.876985	0.986085	1.20445	1.4435	1.20327	1.21928	1.0935	1.46537	0.975722	1.16434	1.05953	1.07173	1.27413	0.98746	1.49818	1.21903	1.07653	1.05719	1.06581	1.09144	1.20786	1.11197	1.29719	1.395	1.29183	1.15249	0.914855
1342	0.5999	0.671482	1.1329	0.963423	0.658388	2.34498	0.802239	1.99437	0.765438	1.74727	0.705535	0.875127	0.580968	0.796783	0.854858	0.913266	3.15305	1.01963	0.715502	0.926514	0.941117	0.979142	0.593898	0.715337	0.567363	0.882356	0.915403	0.626241	0.888559	0.582799	1.07266	1.37568	0.719359	1.42046	0.495343	0.403382	0.613328	1.1331	1.14031	0.48578	1.03757	1.41225	1.87206	0.718882	0.652766	0.451078	1.05931	0.88403	0.761018
1343	0.887283	1.35675	1.41089	1.08185	0.961559	0.800867	1.02084	1.16997	0.859564	1.33053	1.01625	0.916545	0.94416	0.903115	0.901443	1.03093	1.04273	0.983889	0.824066	0.710213	0.694026	0.930718	1.23756	0.874098	0.964971	0.921734	1.2646	0.997996	0.728073	0.775756	1.10491	0.740149	0.932531	0.888114	0.64352	1.01937	1.20884	0.877067	0.753619	0.964518	0.899426	1.02644	0.805662	1.01141	0.709889	0.973373	0.853905	0.993478	0.894424
1345	0.618213	0.448346	0.540816	0.389412	0.394795	0.543887	0.506502	0.766826	0.529133	0.654757	0.667525	0.480718	0.488982	0.480285	0.620314	0.514632	0.761865	0.592768	0.37614	0.445152	0.252647	0.603824	0.877688	0.970539	0.567021	0.651633	0.60285	0.486859	0.508945	0.549809	0.570801	0.689722	0.720558	0.659509	0.527125	0.500901	0.53526	0.592086	0.688564	0.48185	0.550752	0.735088	0.739017	0.614993	0.409626	0.520918	0.31856	0.648001	0.836468
1346	0.725794	0.477121	0.68296	0.385823	0.458095	0.539697	0.565241	0.797603	0.638356	0.596648	0.697996	0.564145	0.508174	0.502772	0.615952	0.565673	0.827825	0.599603	0.381691	0.503418	0.372056	0.605558	0.912129	0.974438	0.626302	0.60362	0.549491	0.558638	0.493789	0.664226	0.653858	0.759094	0.751323	0.66861	0.485994	0.518433	0.582713	0.437962	0.670042	0.553253	0.629206	0.736831	0.750123	0.763381	0.449891	0.49535	0.356824	0.667285	0.858478
1349	1.26406	0.915222	1.19852	1.22071	1.06525	1.38494	1.05979	1.12956	0.980455	1.31952	0.953401	1.38969	1.45414	1.04459	2.70512	1.17341	1.16318	1.07616	1.20583	1.03968	1.12562	1.11845	1.36676	0.873264	0.932014	1.09945	1.02355	0.822442	1.12015	1.0914	1.04096	1.04413	0.695089	0.974603	1.05699	1.12811	1.00826	1.66095	1.3245	1.25988	1.39839	0.909882	1.02525	1.04909	1.36032	1.10247	0.849234	1.40529	1.25562
1350	1.20443	0.945878	1.21271	1.09533	0.903421	1.24983	1.36315	1.09482	1.07249	1.18264	0.851576	1.19421	1.05722	0.956286	1.07003	1.12867	1.12428	1.01891	0.912239	0.925518	0.930864	1.16687	1.12994	1.06621	0.813511	1.29134	0.883321	0.809856	0.888305	0.919802	0.971838	1.12128	0.610255	0.909128	1.03987	1.06845	0.932724	0.934407	0.960375	1.05804	1.28261	0.82537	0.775114	0.979126	1.01673	1.16018	0.899325	1.14468	0.714598
1352	1.35066	0.89234	1.3792	2.22502	1.51991	1.4735	1.30652	1.063	1.76877	1.89221	2.22797	1.85248	1.47396	1.48797	0.879602	3.51017	1.07886	1.31951	1.44316	1.3975	2.57935	1.81803	1.90095	1.80227	1.3233	1.10378	1.05777	1.29691	4.70193	2.71014	1.2579	3.94027	2.95914	1.58115	1.39925	1.17268	2.29023	1.11343	0.804891	7.28764	1.87266	1.43515	1.40628	1.33335	1.48874	1.35529	3.36423	0.654417	1.2424
1353	0.791106	0.901852	1.30459	1.19245	1.02942	1.0433	1.3406	1.31043	1.00182	1.2643	1.13866	0.952165	1.37297	1.99979	2.29344	1.47853	0.665413	0.8153	1.28845	1.42467	0.991666	1.36105	1.27421	0.629485	0.763595	0.885897	1.44566	0.842469	0.844742	0.984692	0.934203	1.48836	0.859177	0.731247	1.41328	1.12644	1.10619	1.1348	1.15536	1.12979	1.46465	1.19861	1.10844	1.1491	1.13914	0.701087	1.27057	1.30033	0.800148
1355	0.572395	0.704767	1.58532	0.996409	0.75055	0.868018	1.35698	1.41627	1.2229	1.35094	0.626284	0.794111	1.37584	2.60397	3.03241	2.78793	0.5503	0.702535	1.71185	2.12503	0.85745	1.97467	1.9881	0.665128	1.59168	0.94748	1.70394	0.633651	0.791742	0.580237	1.15735	1.42031	0.829532	0.597539	1.59344	1.13619	1.03752	1.38736	1.23678	0.67362	1.95265	1.01727	1.00939	0.588109	0.961363	0.588829	1.64336	2.10284	0.867578
1356	0.940162	0.81899	1.2011	1.49487	1.01245	1.05228	1.19047	1.5339	0.857346	0.892588	1.13742	1.33435	1.58887	1.48012	0.955037	1.46491	0.956741	0.694821	1.2502	0.948648	0.996088	1.21393	1.58393	0.760628	0.884402	1.02998	0.973637	0.713683	1.34871	1.23273	1.26677	1.55924	0.665406	0.857697	0.888945	1.07537	0.908936	0.798943	0.931257	1.1253	1.39094	1.21269	0.924374	1.09711	0.915023	0.850326	1.06585	1.32735	0.553548
1359	0.688861	0.632115	1.25106	1.12972	0.872125	0.709651	1.3063	1.64243	0.835033	1.10495	0.887282	1.00626	0.97067	1.50135	1.80341	1.22919	0.819256	0.661923	1.28929	0.841277	0.533139	1.31353	0.627866	0.825791	0.840536	0.938216	1.29898	0.631845	0.982873	1.34264	0.920964	0.8205	0.762937	0.644959	1.68184	1.054	1.14436	1.03274	1.08099	0.994471	1.11769	1.23386	0.962998	1.07935	1.18413	0.468214	1.2976	1.09132	0.641056
1360	0.864731	0.61983	1.27901	1.27997	0.731552	0.891748	1.01125	1.7205	0.818501	0.854459	0.925136	1.29696	1.19423	1.26129	2.49497	1.19001	0.966877	0.668478	1.4181	1.02771	1.01308	1.22411	1.53877	0.628659	0.896021	0.998592	0.924979	0.561714	1.01531	1.36277	1.20184	1.18216	0.596353	0.676424	1.01527	0.989598	1.00956	1.06385	1.14365	1.05889	1.7832	1.37934	1.00867	1.00118	1.21576	0.674425	1.56289	0.973572	0.673741
1361	0.620739	0.580349	0.570521	0.492535	0.426902	0.692043	0.683394	0.750373	0.596685	0.748825	0.784431	0.44185	0.68843	0.778762	0.688356	0.684933	0.832262	0.681934	0.429289	0.447289	0.395605	0.726118	0.930837	0.870839	0.593182	0.747696	0.661259	0.686831	0.5416	0.573933	0.792475	0.816159	0.741195	0.712239	0.59743	0.711772	0.634378	0.820016	0.729642	0.839288	0.709539	0.738717	0.842868	0.590141	0.371527	0.748791	0.54508	0.845781	0.660418
1363	0.669656	0.775326	1.25064	0.780242	0.67105	1.01086	1.1769	1.12241	1.09534	0.960995	0.926174	1.03241	1.04411	1.16456	1.18356	1.28627	0.82632	0.628822	1.09538	0.896886	0.828503	1.03134	1.20392	0.836937	0.917029	0.855995	0.852712	0.764711	0.796642	1.71823	0.999863	1.3935	0.764523	0.718916	1.00162	1.01688	0.841012	0.822658	0.93128	1.24585	1.13515	0.864901	1.06889	0.964859	0.758168	0.801446	1.31009	1.27183	0.818767
1365	0.509717	0.752481	3.1353	1.09301	0.729446	0.929085	1.20736	1.69238	1.17027	0.946533	0.786874	1.3665	1.42189	1.42178	1.7721	1.53303	0.793785	0.613062	1.54982	1.66386	1.07477	1.49172	1.11012	0.753134	0.706212	0.855256	0.73617	0.783805	0.943614	1.74767	0.999897	1.77016	0.776357	0.65435	1.01159	0.98679	0.986089	0.85981	1.23204	1.36187	1.78754	0.932879	1.12878	1.08088	1.02102	0.922826	1.72878	0.844784	0.658981
1366	0.318112	0.76795	0.519564	0.466845	0.373208	0.430043	0.585198	0.360081	0.321348	0.498664	0.468797	0.441299	0.375629	0.769329	1.42432	0.742085	0.318841	0.389606	0.613749	0.561045	0.421343	0.56227	0.437368	0.472198	0.456177	0.588703	0.442708	0.530175	0.325187	0.586517	0.786725	0.556311	0.239797	0.435634	0.484308	0.395391	0.366476	0.703064	0.636332	0.751204	0.47591	0.402183	0.388932	1.06924	0.341076	0.366938	1.01696	0.632586	0.388429
1367	1.23391	0.376025	0.710687	0.453264	0.312968	0.648398	0.825673	0.993703	0.696994	0.79384	0.879379	0.427246	0.68777	0.653404	0.660497	0.723578	0.956682	0.572714	0.361726	0.423478	0.312452	0.808141	0.876432	0.70666	0.611445	0.790305	0.555332	0.742248	0.543916	0.50908	0.49675	0.855227	0.722712	0.742765	0.4449	0.39928	0.809646	0.757383	0.647695	0.727791	0.707724	1.00702	0.901345	0.645489	0.369796	0.817374	0.628577	0.914143	0.530463
1369	0.84164	1.54627	2.00761	0.924534	0.73765	0.703492	1.33029	0.54034	1.6271	1.46254	2.02702	1.20979	0.894758	0.566878	1.02649	1.29482	0.576071	1.10419	1.56663	0.757926	0.896648	0.670651	0.636099	0.35355	0.887979	0.898307	0.827297	0.817825	0.699291	3.08885	0.815483	0.776909	1.59026	0.757415	1.51792	1.56974	0.986404	1.19485	0.709273	0.930497	0.833724	0.455892	0.579127	1.42971	0.959129	1.22887	0.924441	0.644779	0.517288
1370	0.87203	1.26586	1.32538	0.980972	0.915862	1.1054	1.13727	0.868731	1.28731	1.12477	1.37305	0.98618	0.980077	0.877148	1.14138	1.05303	0.903712	0.962499	1.35438	0.875119	0.826598	0.972147	0.980614	1.14396	0.978318	1.0795	0.777834	0.8314	0.99845	2.18264	1.00571	1.01645	0.79589	0.939423	1.06492	0.955954	0.934256	1.51037	1.02395	1.05254	1.12179	0.963153	0.795666	1.10758	0.828284	1.17703	1.01247	1.07183	0.799704
1372	0.311507	0.651133	0.893541	0.644634	0.51547	0.418064	0.626973	0.792944	1.16284	0.801159	0.809203	0.853331	1.02991	1.16919	1.53327	1.22283	0.767092	0.589209	0.538056	0.522375	0.525232	1.11328	1.33884	0.764741	0.454589	0.811983	0.520628	0.687545	0.75184	0.775195	1.24123	1.14823	0.452404	0.746076	0.762249	0.411223	0.839085	0.808768	1.00095	0.54419	1.32593	0.605939	0.4292	0.794392	0.692625	0.900356	1.08717	1.38894	0.553345
1375	0.806459	1.17855	1.29246	1.25138	1.21513	1.32548	1.19022	1.02025	1.0263	1.33576	1.25454	0.858136	0.961734	1.20961	0.939607	1.35902	1.09444	0.989286	1.40613	1.37163	0.771348	1.3008	1.1954	1.98146	1.23279	1.19768	1.27872	1.07853	1.07254	1.073	1.59712	1.29899	1.2995	1.24155	1.25258	1.07582	1.06909	1.12488	1.42633	1.14139	1.2338	1.40024	1.12217	1.2818	1.28782	0.721343	0.920009	0.98025	1.13872
1376	0.358658	1.01617	0.864047	0.94645	0.819193	0.909729	1.14757	0.832875	1.2884	0.715719	0.84941	0.965798	1.02527	1.11122	1.40925	1.07726	0.80782	0.832644	0.992894	0.757435	1.05959	0.915472	1.04904	0.708909	0.673967	0.971617	0.795695	0.669797	0.902601	1.14768	1.40496	1.21685	0.549982	0.772109	0.91547	0.884525	0.917692	1.09936	1.20394	0.79909	1.30541	0.989308	0.630745	0.751971	1.20269	0.985322	1.85237	1.05125	0.513088
1378	0.8298	1.34197	0.939481	0.923244	0.676373	0.891759	1.53607	0.778746	1.21341	1.13953	1.23705	0.869026	0.970618	0.962924	0.884257	1.01148	1.0327	0.853385	0.805109	0.91197	0.781145	0.724399	1.26511	0.83115	0.94481	1.43206	0.77154	0.776208	0.807553	4.68632	1.08342	1.61341	0.762591	0.965793	0.995977	0.884472	0.914504	1.05357	0.989048	1.25928	3.99902	0.796902	0.731899	0.865645	2.91678	1.01564	0.876011	0.648027	0.763421
1379	0.967487	0.875429	1.05779	0.918073	0.752528	0.992609	0.903653	0.912686	0.854282	1.26349	0.722809	1.01694	1.01403	1.07794	1.04579	0.939694	1.06061	0.82366	0.665805	0.944965	0.817865	1.01532	1.50163	0.790457	0.916226	0.926613	1.08538	0.67156	1.0313	0.965912	1.28135	1.21741	0.661009	1.06953	0.902455	0.797616	0.879689	0.897954	1.35333	0.851035	0.844639	1.06988	1.03292	0.841287	1.09453	1.07181	0.871452	1.02587	0.813656
1380	0.516778	0.843516	0.815288	0.878163	0.871156	1.05322	0.998394	0.914652	0.900575	0.796628	0.827368	0.961487	1.14317	1.04472	1.29553	1.05792	0.822893	0.71533	0.886336	0.914849	0.988141	0.980934	0.91761	0.778628	0.696455	0.949605	0.817681	0.621083	0.886659	0.940549	1.22525	1.21687	0.585795	0.868024	1.03491	0.874221	0.859638	1.21003	0.986656	0.884711	1.84661	1.01845	0.740822	0.800087	1.03452	0.984064	2.21118	1.0112	0.58067
1381	0.60687	0.732427	1.13061	0.945457	0.761617	0.789101	1.11111	0.864087	0.728833	0.633462	0.99914	0.882859	0.968344	0.991592	1.2572	1.27601	0.91508	0.940272	0.775456	0.798244	1.28454	1.06844	0.541864	0.668548	0.515481	0.664857	0.588654	0.679868	0.873679	1.05606	1.03379	1.47498	0.484806	0.986222	0.850596	0.74578	0.924988	1.0202	0.865473	0.95315	1.88144	0.826245	0.599617	0.913972	0.920708	0.757892	1.08726	1.1165	0.542011
1392	1.01566	3.04739	1.09375	1.27773	0.896822	1.43505	0.483623	1.21769	0.651855	1.65231	1.42351	1.17224	2.11234	1.78241	0.894296	1.84459	0.478451	2.63954	1.81175	1.56625	1.24296	1.09324	2.22191	1.54001	2.10577	2.11733	0.895329	0.418985	1.143	1.08577	1.37415	1.48768	0.955982	1.22916	1.40235	1.43666	3.712	0.939849	1.42438	1.84511	1.41089	1.36482	0.272836	1.17821	0.975734	1.09455	3.90949	0.630476	1.2362
1394	0.987239	1.08309	2.38705	1.11505	1.06129	2.40354	1.34841	1.33449	1.6104	1.56563	0.789697	0.8984	1.5074	1.95326	0.631173	1.20532	0.889099	1.47795	0.922445	1.00027	1.14225	1.26891	0.655428	0.784166	1.24958	2.53934	1.53192	1.26994	1.2745	1.12295	1.38844	0.922645	2.5944	1.47938	1.43104	1.06576	1.37476	1.95069	2.00873	0.852522	1.57385	1.18601	0.994875	1.05775	1.09727	2.05235	1.29353	2.01512	1.19763
1399	0.926305	0.966264	0.980252	1.0605	0.940133	1.00596	1.00051	0.765818	0.952296	0.922697	0.926124	1.29143	0.9948	1.03247	1.04269	1.08898	0.896563	0.987028	0.880474	1.0026	0.931228	0.933725	0.914624	0.957145	1.04028	0.814148	0.955731	0.916718	1.03383	0.970233	1.02166	1.02252	0.837932	0.723632	0.929358	1.05336	0.83704	1.06023	0.929353	1.06542	1.08668	1.02729	0.867107	0.915659	1.26143	1.28046	1.01652	1.15772	0.825658
1401	0.909172	0.727995	1.43793	1.39437	1.97816	0.961035	0.90463	1.68961	1.33152	0.84796	0.803965	0.621612	3.20222	5.11083	0.939738	1.44323	1.35386	2.026	1.80159	1.36917	1.67728	0.751623	0.385202	1.30879	1.02884	1.03957	1.49328	0.84104	1.12965	2.14973	1.23303	1.31926	2.63461	1.66472	1.3917	1.53088	4.15152	0.65893	0.421434	0.693998	3.02602	1.44499	0.94425	0.946393	1.09193	1.64758	3.29486	1.52466	1.4532
1405	0.604619	1.47982	1.62259	1.37354	1.14173	1.12525	0.955964	1.35673	1.83107	1.53317	0.694167	1.13634	0.810408	1.47133	1.20566	1.36836	0.7484	1.82902	1.79941	1.54706	9.64067	1.40215	2.0527	1.5429	49.9216	1.51078	0.890877	0.897387	1.03259	1.95581	1.19681	1.51317	1.63577	1.31021	1.05726	0.970506	2.18725	0.835625	0.57501	0.772088	2.04501	1.17155	1.93551	1.06092	1.09135	1.2226	1.59743	0.86031	1.03177
1406	1.37496	0.96075	1.15372	1.09761	0.962974	1.15633	1.32105	1.35208	0.923809	1.04293	0.831208	0.930101	0.74327	1.51803	1.11297	1.16602	1.40345	1.06618	1.0846	0.899124	0.915274	1.1569	1.25181	1.1803	0.768612	1.18088	1.01239	0.774435	0.785473	0.85577	1.32724	1.24107	1.14211	1.08644	1.16002	1.04462	1.0925	1.35302	1.21189	1.19981	1.46979	1.12245	1.20942	0.957328	0.946227	0.931129	1.05393	1.66709	0.951084
1411	1.14888	1.17991	0.895141	1.01515	0.947252	1.16897	1.07133	0.887504	0.921282	0.809849	0.807979	1.19603	1.00968	1.0892	0.847222	1.14112	1.17761	1.135	0.957027	0.956544	1.09114	1.0993	1.89329	1.07821	1.16422	0.794773	1.19474	0.770382	1.01888	0.955753	1.02341	1.4492	1.23621	0.953045	0.989355	0.925995	0.831302	0.865693	0.776595	1.02824	1.15919	0.851335	1.11583	1.02872	1.03943	1.00252	0.890024	0.998308	1.23527
1413	1.08318	1.128	1.21308	1.42172	0.883795	1.57668	1.48415	1.95509	0.846553	1.44771	0.839728	1.06296	1.29445	1.34045	1.00322	1.12505	1.88284	1.32591	1.04174	1.20264	0.882422	1.655	2.72993	1.31816	0.950633	1.38568	1.43607	0.924771	1.2088	0.641837	1.50939	1.66611	0.779894	0.991659	1.22954	1.16882	0.929655	1.3882	1.18571	0.955971	1.25382	1.28789	1.38124	1.07877	0.84885	0.594634	0.675858	1.4957	0.95745
1414	0.90135	1.57551	0.93093	1.15698	1.00234	0.94661	1.01723	0.619408	0.871505	0.743219	0.928906	1.00769	1.19248	0.880211	0.803493	0.923648	0.724742	1.13692	0.984753	0.822022	0.993421	0.809848	0.607217	0.720572	0.968748	1.88076	0.740918	0.843418	1.01672	0.790172	0.902058	0.791994	0.814585	1.07285	0.837454	0.814581	1.1117	1.01156	1.01888	0.965406	1.20005	0.907363	0.599238	0.959639	1.13072	0.937255	1.23886	0.829091	0.783864
1416	0.991631	0.842747	0.999234	0.847694	0.838884	1.04993	1.03042	0.983629	0.79653	0.75015	0.918125	1.0101	1.00131	0.913898	0.962867	1.04651	1.33952	1.02941	0.781307	0.970446	1.00181	0.826961	0.739145	1.1664	0.913742	0.740834	0.991382	0.890264	0.826185	0.909543	0.946267	1.03727	1.04036	0.972907	0.772275	0.779311	0.890428	0.563124	0.911446	0.977304	1.07782	1.1456	0.887082	1.0176	0.988436	1.11737	0.911216	1.01507	1.41852
1418	0.932866	1.01867	1.00439	1.02039	0.970899	1.06236	1.00118	0.849782	0.950089	0.885683	0.984458	1.22104	1.07719	1.08846	0.978931	1.12153	0.945952	0.9238	0.84263	1.06698	0.952404	0.948528	0.924053	1.03673	1.09913	0.880988	1.04871	1.06612	1.06643	0.97497	1.07454	1.01609	0.911871	0.748137	1.04577	1.06835	0.865916	1.04412	0.936915	1.02906	1.16995	1.09995	0.968701	0.955139	1.29798	1.26867	1.03142	1.08943	0.963255
1419	0.815347	1.02885	0.890904	1.06296	0.935432	1.04252	0.999967	0.969228	0.938172	1.24216	0.919167	1.16009	0.944556	0.949093	1.03301	0.892336	0.952325	0.821054	0.886849	0.932488	0.818645	1.13478	1.28653	0.87434	0.825006	1.19926	1.15241	0.829291	0.9584	1.08029	1.01632	0.999547	0.991645	0.918248	1.28981	1.29	0.738083	1.0862	1.17743	0.898412	1.11693	0.732672	0.957717	0.911177	1.03862	1.01554	0.94704	1.22982	0.752091
1422	0.905244	0.852898	0.724865	1.10183	0.879218	0.719856	0.961843	0.901954	0.92708	0.935094	0.923104	1.09594	1.16195	1.02355	1.08918	0.991235	0.802646	0.931723	0.988549	0.916777	0.926949	1.06186	1.01305	0.878512	0.714526	0.7152	0.717111	0.821557	0.880194	2.9597	0.8815	1.02285	1.74789	0.873625	0.944356	0.930902	0.790041	1.30951	1.39897	0.913275	1.37121	0.916117	0.6977	0.860134	0.970911	1.12962	1.06705	0.991837	0.758996
1431	0.947621	1.00233	1.01132	0.909832	0.695748	1.13394	0.98345	1.30865	0.677659	1.08325	0.834401	1.14437	1.27769	0.972876	0.865346	1.01161	1.57222	0.896305	0.725982	0.964026	0.618114	1.13034	2.0685	1.58044	0.724867	1.58672	1.28924	0.578127	0.777631	0.574704	1.18503	1.30469	1.03434	1.52454	0.77744	0.628848	0.981383	0.914926	1.23242	0.886338	0.985102	1.14864	0.937296	0.842277	0.718007	0.659107	0.466591	1.21871	1.38183
1439	1.20065	1.13147	0.980544	1.06132	0.691045	1.04332	0.931346	0.988843	0.754065	1.19032	0.639719	0.958589	1.07186	0.988733	0.743716	0.782281	1.15991	0.703254	0.519265	0.772158	0.898608	0.90831	1.44059	1.13097	0.64707	1.55722	1.058	0.613791	0.814861	0.612411	1.00207	0.82176	0.689035	1.04924	1.01792	0.979358	0.786251	0.844452	1.15106	0.69673	0.796719	0.980986	0.865661	0.767336	0.676374	0.810005	1.01922	0.823416	1.58546
1442	1.95196	0.771983	1.25169	1.40072	1.10104	1.20274	0.915863	1.29121	1.17754	1.29835	1.11211	1.16476	1.1987	0.901069	1.3891	1.16818	1.49249	1.0113	0.735722	1.26157	1.02646	1.16608	1.57921	0.702515	0.725534	1.24158	0.959985	0.817731	1.14854	0.932405	0.985751	1.27536	1.06621	1.00863	1.02881	1.0935	0.988646	0.823634	1.14637	1.17754	1.1374	0.705071	1.04852	1.07486	1.08828	1.02231	1.16456	1.73941	1.28098
1446	1.38255	1.13013	1.42575	1.62923	0.898998	0.983474	0.722903	1.01704	1.07631	1.28965	0.925212	1.13867	1.84485	1.16932	1.01358	0.790267	1.25781	1.00517	0.930862	0.914287	1.48303	0.992821	1.15739	0.969001	0.995203	1.40482	1.46044	0.719454	1.09475	1.54128	0.833358	0.814801	1.04854	1.49776	1.12021	1.02852	1.20672	1.0124	0.687736	0.766711	1.14253	0.828569	1.2321	0.840449	1.76972	1.00989	0.883154	1.08096	0.986036
1447	1.87138	0.464225	1.18766	0.795379	0.698471	0.916986	0.609925	1.21331	0.890489	0.822765	0.994127	0.651575	0.831718	0.676959	0.727592	0.784545	1.44433	0.899865	0.355355	0.785149	0.700213	0.630009	1.17435	0.706079	0.583861	0.729679	0.577418	0.707925	0.665812	0.687898	0.666523	0.738838	0.956994	0.824239	0.610183	0.712683	0.912903	0.438193	0.680237	0.767634	0.757999	0.691394	0.925527	0.97386	0.61932	0.730687	0.807091	0.950119	1.12693
1448	1.84562	2.20384	2.01505	1.59129	1.20195	1.87347	1.31518	1.99575	1.08725	1.76615	1.28598	1.91407	4.59898	2.68024	1.03326	1.05032	2.54878	1.64541	1.24547	1.74022	2.63326	1.56912	1.34948	2.4439	1.84821	2.90175	2.23265	1.17018	1.34699	1.51464	1.05151	1.56752	1.33122	2.20332	1.62026	1.38289	2.10389	1.33007	0.939905	0.899385	1.42018	2.19821	2.13098	1.30071	1.64377	1.37923	2.32822	1.29773	2.29022
1449	1.50594	0.969946	1.57457	1.20222	0.944549	0.753013	0.685038	1.01033	0.919813	1.23857	1.00029	1.27326	1.33259	1.80911	0.778818	1.22923	0.831376	0.803849	4.21826	1.71995	1.29296	0.862753	1.06331	0.893844	1.18631	1.29084	1.10313	1.05508	1.13955	2.52744	0.63953	1.08351	5.75827	1.43048	1.19583	1.2853	1.41649	1.51728	0.661133	1.62983	1.77214	0.835386	1.01145	0.92353	0.984272	1.13965	1.42093	1.02203	1.2087
1456	0.738707	0.991155	0.98051	1.05751	0.860519	0.757505	1.8338	0.740026	1.07079	0.879006	0.934414	1.02245	0.847891	0.984247	1.76106	2.07423	0.598122	0.764381	1.04576	0.744955	0.773612	0.901061	0.95594	0.551266	0.662875	0.899028	0.755223	0.858907	0.76916	1.53498	0.801952	1.93189	0.472129	0.683592	1.12465	0.982788	0.624352	1.07221	1.24996	0.857827	1.26838	0.779602	0.423973	1.0382	0.986035	1.20325	1.23024	0.885526	0.740543
1459	2.25053	0.601845	0.873536	1.80978	0.922233	0.805009	0.689214	1.50784	1.41418	1.30193	1.23185	0.773077	1.14705	0.794279	1.35954	1.11784	1.935	0.756758	0.357359	0.772478	0.613184	0.975811	1.50688	0.592029	0.465405	0.899792	1.2553	0.880556	1.03434	0.948717	0.981216	0.952026	0.780151	0.712053	0.934561	1.13344	0.914549	0.741455	0.783162	0.974602	0.813789	1.05017	0.882271	0.989689	0.861421	0.844873	1.35659	1.30027	0.990262
1460	2.24606	0.421099	0.709029	1.09053	0.605709	0.62832	0.509949	1.43377	1.13422	0.958022	1.13767	0.468977	0.807807	0.801612	0.860462	0.813255	1.89466	0.73434	0.253175	0.433887	0.484976	0.553746	1.26403	0.638849	0.421482	0.59995	0.7663	0.808283	0.650184	1.03399	0.773808	0.608023	0.97386	0.807766	0.678076	0.788302	0.880076	0.472874	0.59412	0.67404	0.770691	1.06214	0.82884	0.924276	0.540416	0.632055	1.15682	0.800093	0.97063
1461	2.04592	1.54761	1.35696	1.65712	1.1701	1.36877	1.12608	1.59044	1.23374	1.83489	1.25602	1.50027	3.23725	1.22205	1.484	0.934904	1.97349	1.2286	1.01122	1.05099	2.18525	1.46494	1.23202	1.05176	1.02733	2.57901	1.75377	0.881816	1.14868	1.30908	1.1149	1.15977	1.01932	1.2351	1.57636	1.56642	1.22924	0.834987	1.07033	1.29473	1.28302	1.11217	1.46917	1.1741	1.11726	1.29512	1.06373	1.54101	1.48213
1462	0.941464	1.51058	1.32352	1.02454	0.890753	1.54187	0.722647	1.09409	0.91469	1.22705	1.01368	1.13694	0.856508	2.00989	1.11301	1.1064	0.97444	1.1844	1.03736	0.638812	1.805	0.463876	1.08702	0.689314	0.739205	1.92003	0.864923	0.911067	0.4762	1.20217	0.608226	1.01626	3.00368	1.18476	1.16232	1.29582	1.13322	1.16904	0.595877	0.964735	2.33932	0.890159	0.684665	0.639069	0.87842	1.48833	1.01483	0.784182	0.417654
1465	0.969326	1.15921	1.41306	1.12102	0.777707	0.759544	0.682448	1.27171	0.811854	0.824701	0.771698	0.903244	1.0884	1.2547	0.531338	1.04296	1.1561	0.689036	1.16272	1.01777	1.09823	0.774923	0.903799	1.51445	0.673818	1.16663	0.734489	2.23089	1.15304	1.04579	1.23294	1.43431	1.03389	1.00513	0.896286	1.01025	1.12827	1.10942	1.21413	0.828996	0.963765	1.25219	1.07716	1.05375	1.18396	0.754892	1.19305	1.30984	1.54493
1467	0.844809	1.65807	1.40342	1.73356	1.6993	0.901424	1.12333	1.17394	0.764538	2.44519	1.49185	1.65688	0.797469	0.423586	1.38771	1.07141	1.4101	1.24956	0.672756	0.800303	1.43289	1.79443	1.64829	1.78551	1.24674	1.50614	0.969457	1.29249	2.05583	0.853157	2.70477	1.69623	1.33052	1.86051	1.78141	1.15472	1.91531	1.2442	3.78512	0.951487	1.88154	1.1899	1.27712	1.65219	1.98964	1.68384	0.737945	0.962612	3.2337
1470	0.580499	0.571612	0.756455	0.790461	0.683687	0.690087	0.734957	0.902269	0.66256	0.71851	0.694045	0.748044	0.714289	0.931821	1.01523	0.802999	0.858597	0.84601	0.886021	0.729193	0.742159	0.89647	1.02421	0.887083	0.722542	0.810668	0.643802	0.562174	0.597892	1.09682	0.857986	0.736309	0.62926	0.682368	0.793888	0.580362	0.89405	0.796301	0.766498	0.81971	1.01606	0.638228	0.755881	0.771176	0.785777	0.712211	1.02744	0.757118	0.820846
1473	1.01923	0.87536	1.55546	1.02937	0.921586	0.88754	0.820542	1.51374	0.889581	1.51849	0.998563	0.970519	1.56075	1.40751	0.471434	1.16589	0.921029	1.50568	1.64663	1.59491	0.982796	1.286	1.38286	2.80705	0.934303	1.15486	0.981338	1.05217	1.32026	0.983582	1.40745	1.26838	1.26469	1.24233	1.32915	0.593934	0.911775	2.03571	1.37864	0.723465	1.401	1.3801	1.13996	1.1422	1.19595	1.33967	1.58829	1.08078	1.01955
1474	1.33471	1.2971	1.89623	2.11564	1.91284	1.02307	0.623016	1.55111	1.29156	1.41106	1.58506	1.63617	1.09985	1.01589	1.08897	0.867702	1.17698	0.674447	0.660439	1.50443	1.18339	0.822486	1.6632	1.6348	1.67859	1.33455	1.45162	1.04327	1.27784	0.571369	0.835988	0.592843	1.17578	1.8385	1.8217	1.81406	1.30801	0.660758	0.960632	1.50743	1.50219	1.87558	1.77914	0.91803	1.28036	1.10209	1.92205	1.15072	1.31349
1475	0.864546	0.97715	1.41411	1.48762	1.31992	1.06487	1.33737	1.41633	1.17989	1.54993	1.01698	1.16101	1.36487	1.53065	1.30294	1.56748	1.11096	0.968473	2.01245	1.43383	0.816396	1.27884	1.45688	1.5097	1.19834	1.52349	1.18187	1.09835	1.36115	1.61915	1.46302	1.21944	0.914192	1.20003	1.15733	0.621405	1.20118	1.34014	0.987117	1.19842	1.35337	1.54505	1.29153	0.965732	1.21662	1.36018	1.73576	1.22494	1.10435
1477	1.36373	1.62895	3.11533	1.25034	1.59542	1.65709	0.642106	0.874351	0.55033	2.43412	0.950204	1.59802	1.35377	3.54106	1.85631	1.05092	1.79779	0.470618	1.31817	1.32009	2.76469	1.25617	1.63401	2.07568	2.03957	2.30922	2.3021	1.47505	1.73368	1.36277	1.33149	1.0655	0.700759	1.03841	1.80323	0.831288	1.40471	2.38246	1.93762	0.295713	1.94789	1.67935	2.06217	1.13292	1.11512	1.73025	1.19237	1.7006	2.6768
1479	0.804281	1.13856	1.9673	0.903452	0.903574	1.0197	0.79443	1.45969	0.803828	1.71522	1.16338	1.30088	2.0793	1.95739	0.860518	1.30637	1.01347	1.09885	3.00238	5.02414	1.17857	0.782881	1.52681	1.16076	0.771723	1.42849	0.699647	1.57364	1.02181	1.09432	1.34004	1.17368	1.24145	1.33823	0.91432	0.675938	1.12861	1.03567	0.652107	0.617499	1.0541	1.03691	1.20481	1.4453	0.886413	1.56211	1.60976	1.3382	1.27781
1480	0.614881	0.515964	0.659976	0.582403	0.653935	0.68514	0.665574	0.926142	0.674906	0.694257	0.623585	0.672068	0.536749	1.08573	0.522778	0.704577	0.560092	1.01071	1.13811	0.85995	0.651317	0.665275	0.647712	0.786139	0.682722	0.604047	0.489063	0.675812	0.763165	0.769216	0.727964	0.51833	0.717195	0.886305	0.62091	0.588215	0.767962	1.04188	0.57842	0.527365	0.794386	0.808088	0.688683	0.839768	1.17344	0.595119	1.14495	0.746642	0.579714
1481	0.352451	1.01155	0.641253	1.27013	1.09375	0.455436	1.04627	0.835917	0.414221	1.82848	1.05131	1.1649	0.600005	0.403936	1.10187	0.734196	1.12946	1.38163	0.447579	0.445045	2.11394	1.22664	1.5236	1.20053	1.04756	1.14832	0.613064	1.15596	1.45539	0.419088	1.9171	0.880412	1.33287	1.52301	1.23988	0.784066	2.05042	1.07984	2.0546	2.33187	1.20398	0.813177	0.892699	1.2352	1.1274	0.781726	0.67104	2.45152	2.20491
1484	0.773682	0.674201	0.74583	0.866828	0.609853	0.709429	0.648837	1.38731	0.931119	0.803013	0.72848	0.683233	0.89553	2.33707	0.858701	0.867665	0.629158	1.09198	0.961363	0.71227	0.869653	0.647699	1.38708	1.1253	0.635636	0.676991	0.463702	0.71585	0.89109	0.658091	0.914898	0.611153	0.785292	1.27495	0.562726	0.614481	0.926186	0.883094	0.755599	0.771855	0.998316	0.963215	1.77146	1.0534	0.847056	0.812075	1.64399	0.800738	0.683452
1485	0.853164	0.609558	2.52111	0.845644	0.657378	0.654383	0.782441	1.25255	0.760562	0.785535	0.687332	0.847226	1.01492	2.35953	0.629195	1.21067	0.956961	1.10571	1.07191	0.746978	0.942848	0.889117	1.58612	1.15952	0.661706	1.08947	0.776835	0.796373	0.521468	0.569853	0.697927	1.21801	1.08927	1.28846	0.695421	0.653962	1.12626	1.36529	1.35078	0.867326	1.15497	0.941715	1.25036	0.95573	0.770095	0.986852	1.95188	0.765429	0.923304
1489	1.58143	0.695147	1.11034	1.26788	0.921847	0.956867	0.789207	1.04063	0.937396	1.17448	0.919286	1.01584	0.805579	0.779449	1.20869	1.1067	1.11784	0.878018	2.66219	4.19681	0.789155	0.98065	1.37282	0.631184	0.597931	1.1	0.742945	0.627791	0.942944	0.730935	0.918929	1.05677	0.885334	0.892244	0.891398	0.915628	0.87465	0.75324	0.979743	1.02073	1.04348	0.64214	0.825781	0.873847	0.886146	0.857529	1.08238	1.45188	1.09557
1490	0.656693	0.385842	2.65857	0.849155	0.70437	0.873779	0.536774	1.2029	0.89115	0.911637	0.622024	0.470669	0.931584	1.41671	0.463445	0.936401	0.717271	0.979864	1.26212	0.662143	0.892086	0.467429	2.48508	0.923904	0.745189	0.541962	0.513744	0.706755	0.641568	0.935821	0.688711	0.937482	0.841604	1.04915	0.581603	0.633745	0.825975	1.12007	1.07969	0.688282	1.43914	1.05587	0.931386	0.850852	1.10376	0.684975	2.27964	0.719361	0.669937
1492	1.3145	0.434576	0.900176	1.63751	0.907111	0.527138	0.640861	1.41648	1.26634	1.33177	1.01241	0.656454	0.749773	0.753418	1.06427	1.09177	1.22578	0.759826	1.49222	2.35559	0.698887	0.870347	1.45239	0.582576	0.391229	0.801255	0.976865	0.784705	0.968379	0.74043	1.08184	0.896924	0.688834	0.710598	0.88091	0.945043	0.821117	0.754943	0.630992	0.782514	0.906616	0.946569	0.864093	0.870741	0.761805	0.686881	1.4554	1.14657	0.883904
1496	0.941426	0.551477	0.939562	0.934928	0.962667	0.811804	0.689001	1.02381	0.795052	0.710313	0.732452	0.606762	0.73686	0.865026	0.754937	0.894175	0.838657	0.786423	2.75822	4.35174	0.792794	0.588166	0.920145	0.645154	0.430806	0.65308	0.425637	0.482939	0.548803	0.636372	0.616872	0.793276	0.819123	0.818924	0.621439	0.499317	0.82993	0.408197	0.710695	0.671184	0.895868	0.581506	0.993166	0.767664	0.617499	1.18824	1.10395	0.776896	0.773168
1501	0.311208	0.964198	0.668315	1.26823	1.07838	0.443086	1.01605	0.785488	0.367091	1.85751	0.986257	1.06001	0.493692	0.679049	0.913743	0.699317	1.04026	1.31904	0.401783	0.39401	2.24554	0.777895	1.20362	1.02854	0.977	1.13763	0.555185	1.29876	1.33871	0.396507	1.58631	0.603778	1.06164	1.63577	1.34407	0.749445	2.16006	0.931382	1.41368	1.95147	0.936063	0.850784	0.708933	1.1952	1.09954	0.66468	0.663637	1.07705	1.99334
1504	0.477359	0.58986	0.867711	0.628395	0.648762	0.566178	0.669454	0.824237	0.391699	1.10942	0.871755	0.624667	0.553398	1.46629	0.597825	0.986779	1.11657	1.22387	0.377129	0.605983	1.09065	0.52138	1.15818	1.5339	0.926382	0.722434	0.495854	1.09425	0.83189	0.398249	1.17831	0.684112	1.19324	1.3888	0.933853	0.541028	1.96928	0.719867	0.937532	1.15665	0.875257	1.57069	1.49344	0.989968	0.617847	0.661896	2.14343	0.709897	1.82514
1524	1.54489	0.680812	1.15085	1.30378	0.975565	0.907486	0.825272	1.26675	1.07226	1.28717	0.898733	0.982828	0.802381	0.938824	1.23121	1.17853	1.28602	0.977218	0.621465	1.18906	0.826341	0.902605	1.20876	0.704616	0.621087	1.21783	0.783102	0.621388	0.909799	0.632026	0.93723	0.964884	0.830125	1.04545	0.963685	0.942279	0.960763	0.768666	1.09338	0.988311	1.04912	0.68904	0.853133	0.881359	0.869745	0.768769	1.22632	1.32386	1.22027
1525	1.72526	0.512394	1.00328	1.73436	0.868608	0.573271	0.54153	1.48694	1.39482	1.38306	1.09863	0.711807	0.911131	0.924594	1.16462	1.24128	1.51018	0.736563	0.653207	0.934249	0.823366	0.809911	1.16446	0.612097	0.417207	0.904913	1.14899	0.670762	1.10101	0.864124	1.04948	0.858376	0.635917	0.929843	1.04565	0.980136	1.03105	0.764995	0.634835	0.856978	0.875461	1.18636	0.820148	0.876984	0.757693	0.910845	1.5768	1.11446	0.876139
1526	1.29646	0.556129	1.33488	0.781964	0.922764	0.696753	0.851764	1.31211	1.22642	0.84057	0.983839	0.626915	0.597361	1.06419	0.921013	0.839541	1.25671	0.921771	0.611009	1.83322	0.774669	0.753044	1.07531	0.85646	0.608682	0.913422	0.701384	0.717197	0.905012	0.587644	0.971092	0.740095	1.00729	1.09634	0.749098	0.964589	1.03354	0.724749	1.02708	0.796475	0.983998	0.739716	0.983479	0.964008	0.685153	0.646944	1.29686	0.971826	1.06349
1536	0.750247	1.13576	0.93038	1.30452	0.811709	0.861382	0.716957	1.67058	0.658128	1.15672	1.12251	1.12324	0.963831	1.74514	0.595916	1.09601	0.796075	1.30973	1.00585	1.05818	6.47284	0.992444	1.13169	1.54745	0.717073	1.4544	1.26982	0.823052	0.854485	0.758097	1.1716	0.709397	0.650321	1.55506	0.946692	0.541088	1.02703	0.984073	1.06628	0.94692	1.04831	1.16398	1.2302	0.971529	1.25795	0.99554	1.51058	1.11113	0.772302
1541	0.900785	1.4658	1.45614	0.868288	0.813674	1.47989	0.954274	0.999729	0.917763	0.918706	0.878292	0.87824	1.6969	1.74825	1.11324	0.962472	0.823952	0.930854	0.850238	0.866667	1.94146	1.07467	0.852767	1.28246	1.0313	1.13802	0.817367	0.770211	0.850873	1.51782	1.05383	0.753893	1.25394	1.22525	1.12708	1.13285	1.19406	1.20802	1.13635	0.825283	0.793469	1.02183	0.948072	1.06289	1.59632	1.48792	1.47723	1.15669	1.40934
1544	0.783752	1.31917	1.91468	0.982605	1.29905	0.953679	1.4501	1.10554	1.44811	1.74597	1.30852	1.30422	1.07124	1.76491	0.981906	1.29607	0.792183	1.28706	1.04376	0.602627	3.64645	0.724058	1.31477	0.836259	0.664756	1.10174	0.935616	0.738625	0.822066	1.73449	1.13059	0.955538	1.03572	1.51957	1.51542	1.2283	1.60795	1.43374	0.938258	0.91012	1.24258	1.07043	0.616336	1.24526	1.14213	1.10273	1.83635	0.863188	0.811668
1545	0.902697	1.09616	0.715445	2.4526	1.39241	0.772294	0.710004	1.15384	0.883282	1.21116	1.03425	1.571	1.44647	1.48908	1.01519	1.27504	0.789762	0.849739	1.83843	0.771957	0.693465	0.777137	1.02346	1.1911	1.06639	1.04116	1.31428	0.941121	1.55247	1.02068	1.18011	0.946445	0.625415	1.21142	1.13451	1.08083	0.921396	1.01831	0.972918	0.803648	0.988175	1.41456	1.07888	1.18053	1.11664	1.23589	1.69223	0.838682	0.701342
1551	0.895025	1.10071	1.10475	1.21174	1.35625	1.3383	1.04585	0.827834	0.823708	1.24157	1.07093	1.43949	1.11214	1.146	1.16484	1.37919	0.931824	1.17016	1.22564	1.19483	1.04497	1.40159	1.01898	0.963573	0.925569	0.915683	1.32365	0.69555	1.16811	1.03321	1.09393	1.24229	1.11403	1.19133	1.20529	1.24733	1.21331	1.2879	1.08768	1.53189	1.17045	1.27307	0.997968	1.13787	1.1359	0.94889	0.887753	1.4379	0.965491
1555	1.65636	1.85489	1.41273	1.27082	1.30571	1.03941	0.815552	1.47014	0.830416	1.11629	1.40398	1.52665	4.91555	2.11018	0.929295	1.32375	1.3281	0.57016	1.04251	1.25797	2.69072	1.06515	0.966129	1.4738	0.951187	1.68924	1.14234	1.07694	1.05019	7.92197	1.28602	1.18997	2.88146	1.22233	1.12127	1.23946	1.4298	1.32213	0.79074	1.12591	1.55994	1.95829	0.967949	1.54832	1.70298	1.19488	3.12259	0.991048	1.14176
1559	0.571397	0.720092	1.03058	0.897094	0.735208	0.933185	0.650959	1.48212	0.579899	1.00729	0.782558	0.874459	0.798337	2.17014	0.791798	1.10036	0.869892	0.878861	0.962216	0.887468	0.85709	0.950862	1.24613	1.1321	1.0764	1.05102	0.854551	0.908308	0.81093	1.17315	0.676727	0.911746	0.637589	0.914554	1.16587	0.88993	1.12205	1.26329	0.817018	1.23138	1.25926	1.2745	0.979334	0.734378	0.96903	0.898644	1.17234	1.04017	0.854243
1561	2.23931	1.35	1.44128	1.43527	2.01713	2.42215	0.919015	2.4898	1.02034	1.54491	1.34513	1.24281	2.18666	3.03326	0.999182	1.37671	0.782417	1.28393	0.812355	1.65365	2.31956	0.640531	1.45582	1.07832	0.304045	1.66115	0.607389	1.32692	1.71167	2.69314	1.80485	1.05304	2.87943	1.23073	0.880712	1.48274	1.22635	1.24542	1.33476	0.776961	1.96636	0.967408	0.630189	1.11824	2.16999	0.922026	2.30226	0.527853	0.892211
1564	0.444576	0.794849	0.789722	1.12576	0.857529	0.530637	0.249672	0.811876	0.368995	1.85214	0.784999	0.856283	0.649573	2.43349	0.668687	0.810118	0.573449	1.5102	0.546656	0.339107	1.27529	0.650872	1.16193	1.15977	0.811759	1.19165	0.580276	0.9953	0.991854	2.95845	1.49719	0.582151	4.13931	1.50886	1.17774	0.635915	2.1661	1.16989	1.28431	1.53513	2.87851	0.863878	1.52042	0.966867	0.828841	0.730271	1.49961	1.108	1.39476
1565	0.490494	0.95713	1.18622	1.21001	0.994686	1.00709	1.20785	1.06574	0.669303	1.97479	1.1539	1.06137	1.40899	2.03483	1.13151	0.99439	1.11732	1.34183	0.898795	0.598294	1.76984	1.49216	0.987444	1.78271	1.29339	1.69035	0.937262	1.40719	1.09132	1.20367	2.42392	1.29077	2.68503	1.46768	1.24923	1.23389	2.00594	1.36567	2.12834	2.06105	1.25296	1.33234	0.853496	1.13901	1.11612	0.646925	0.983349	1.42522	2.34717
1569	0.267958	0.693965	0.60557	0.796393	0.647554	0.396474	0.769622	0.710846	0.387639	1.27129	0.658588	0.671023	0.546531	0.539938	0.644699	0.620025	1.22035	1.32713	0.491489	0.463651	1.23505	0.677838	1.56921	1.5912	1.35882	1.04746	0.638959	1.43717	1.13387	0.483954	2.05649	0.671157	0.595257	1.46664	1.38285	0.66245	2.15286	1.18304	1.02076	1.24465	1.00783	1.20645	0.723567	0.912344	0.851037	0.687317	0.766625	0.868865	1.74686
1570	0.717185	0.688582	1.26884	0.844279	0.737385	0.985312	0.465306	0.974772	0.645271	1.16704	0.941574	0.820986	1.05155	1.1342	0.584315	0.919564	1.4719	1.60112	0.733946	0.883921	1.30751	0.538297	0.921568	1.59503	1.02695	1.10563	0.671418	1.07281	0.680559	0.967487	1.76594	0.749389	0.782153	1.67269	0.890937	0.66275	2.08144	0.839427	0.800817	1.02655	0.803741	1.26632	1.27455	0.950904	0.761655	0.80034	2.01191	0.568384	1.70139
1575	0.628409	0.57622	3.15232	1.43286	0.733239	1.01714	0.646218	1.34411	0.669973	1.66607	0.6504	1.22586	1.03371	0.84851	1.47947	1.44335	0.938443	0.986297	1.25345	0.546679	2.24583	1.11314	1.38738	0.928896	0.591094	0.887381	1.05755	0.76478	0.871625	0.641523	1.12128	1.23955	1.34927	1.38559	1.01108	0.589094	3.0154	1.69658	1.00362	1.62097	1.06004	1.29423	1.74282	1.03066	0.924398	1.02998	1.69685	0.96448	0.852643
1578	0.951171	1.16383	1.7796	1.17075	1.19709	0.787723	0.995244	1.71333	0.895453	1.50071	0.953598	1.14464	1.2736	1.83756	1.18295	1.19537	1.1721	1.26251	1.58312	1.54951	1.04718	1.30505	0.681743	1.53726	0.838638	1.45929	1.12694	1.02275	1.24509	0.99795	1.05154	1.08641	1.16467	1.26748	1.19304	1.19491	1.37048	1.32306	1.22711	1.12421	1.43612	1.2587	1.1296	0.927135	1.5989	1.30956	1.64385	1.07065	0.741158
1585	1.28908	0.751157	1.01042	1.12499	1.10073	1.22435	1.5178	1.56191	1.39011	1.55516	0.706541	0.500488	1.87875	2.13223	0.995066	1.41933	1.20891	0.880347	0.967485	0.838227	2.13779	0.812176	1.1922	1.03343	0.838164	0.750297	0.56248	0.438629	1.59147	1.67603	1.42053	0.820439	0.978762	1.72201	0.855517	1.66971	2.97997	1.57054	1.16998	0.409176	1.55149	2.46456	1.12831	0.637899	0.715524	1.14337	5.02027	2.11414	2.37426
1588	1.04425	1.29185	1.11786	1.56311	0.967873	1.5783	1.45716	1.29363	0.886454	1.18949	1.02272	1.44708	1.86619	1.96842	0.962112	1.27759	1.3187	0.951203	0.84573	0.948941	1.29887	0.926748	1.46198	1.36741	0.956653	1.21398	1.14592	0.944324	1.27137	1.12645	1.24845	1.02964	0.872535	1.43092	1.02355	0.770763	0.948261	1.05801	0.997946	0.962839	1.05784	1.25574	1.02586	1.08208	1.73946	1.04665	1.29532	0.886031	1.00226
1592	0.726361	1.84803	0.869053	1.75562	1.25207	1.47946	1.51315	0.82617	0.760122	2.25704	0.984761	1.56249	1.59003	1.56173	0.791565	1.39715	1.14419	0.823166	0.819272	1.34122	1.55463	1.17096	0.65513	0.586082	0.283721	0.605783	1.14566	1.17073	1.45082	0.875088	0.553533	1.3894	0.509141	0.566365	1.40736	0.605708	0.707276	0.812988	0.529359	1.79313	0.700366	0.217597	0.400987	0.402525	2.56197	0.823925	1.7377	1.03726	1.31357
1593	0.987565	0.716177	1.26232	0.949392	0.935495	1.14533	0.900998	1.93924	1.03354	1.21083	1.01916	1.07406	1.06638	1.23989	1.02976	0.95449	1.00837	0.924887	0.778838	0.940177	1.01054	1.07494	1.23398	1.29049	0.907922	0.913522	0.838122	1.08852	0.916864	1.25631	1.41855	1.27521	0.84047	0.99711	0.951557	0.830959	1.31493	1.84459	1.43972	0.829073	1.05842	1.26691	1.15633	1.29137	0.965579	0.994286	1.13951	1.25879	0.918276
1594	0.815786	1.14191	1.05256	1.02496	1.10105	1.2201	1.14747	1.42638	1.31824	1.45432	1.09624	0.989903	1.27336	1.09064	1.21855	1.19518	1.05122	0.910426	0.900679	1.30311	1.57115	1.22324	1.6167	1.2129	0.923718	1.70028	1.06338	1.46179	1.17245	1.45117	1.55915	1.31657	0.917611	1.1055	1.20217	1.03813	0.989568	1.25674	0.924568	1.18671	1.09602	1.10759	1.33761	1.39085	1.15322	1.15077	1.33584	1.34403	1.13297
1596	0.281716	0.529397	0.470541	0.685527	0.38481	0.257426	0.726456	0.444489	0.192858	1.34857	0.576428	0.386278	0.328329	0.388019	1.39518	0.876859	0.811932	0.896481	0.48795	0.508628	0.600129	0.86239	1.39181	1.74792	0.945126	0.952496	0.502303	0.742971	0.794726	0.276135	2.7625	0.994677	0.382914	1.06904	1.09485	0.528423	1.43941	1.02813	1.26784	1.36324	1.31559	0.712431	0.480479	0.67918	0.617856	0.46892	0.441777	0.953957	1.16594
1598	0.898788	0.767571	1.80606	1.18254	0.97862	0.893292	0.837833	0.718852	0.734656	0.84871	0.87494	0.789698	1.3266	1.28908	1.15332	1.37893	0.99646	1.02392	0.92362	0.718839	1.11627	0.990098	1.27502	1.07607	0.960877	1.10049	0.706761	0.904867	0.909155	0.730403	1.1025	1.21453	0.548801	1.22936	0.95119	0.764036	1.65493	1.32847	0.993429	0.66943	1.28953	1.85967	0.992877	1.01397	0.94503	0.818467	1.55861	0.897998	1.33707
1599	0.288809	0.689276	0.740645	0.98061	0.749675	0.469687	0.746221	0.693786	0.382694	0.636747	0.832319	0.633066	0.463321	0.393805	0.837886	0.884488	1.07164	1.26642	0.567553	0.463186	0.967829	1.22682	1.81711	2.25514	0.922392	1.22403	0.733144	1.06559	0.951702	0.438416	2.89433	1.40643	0.602728	1.18454	1.63709	0.747648	1.82612	0.983591	1.84566	1.36494	1.37299	0.850871	0.710747	0.953493	1.16177	0.617852	0.708016	1.42582	2.05252
1601	2.22911	0.97797	2.62392	2.43038	1.70593	2.49992	1.52086	9.16909	3.26872	1.7632	3.11081	2.23194	2.96453	2.50005	0.740504	2.59533	1.52917	1.68871	3.20667	4.33053	1.2217	2.19583	3.48886	5.21003	2.20196	1.25879	2.05019	3.91954	2.11838	3.08359	2.55361	2.04206	1.87602	2.64988	2.30147	1.63253	3.23817	2.44303	1.52649	1.68651	3.22637	3.56662	1.83491	2.7534	2.30409	2.42555	1.34922	1.79628	6.46878
1607	0.939253	0.977555	1.36959	1.23627	0.899642	0.666824	0.704952	1.36362	0.687228	1.03642	0.917171	1.07586	2.70768	1.2027	0.905014	1.48342	0.954754	0.938427	1.34252	1.23809	5.72701	0.792353	0.580456	1.58059	0.851855	1.50771	0.719013	0.904874	0.830666	1.11441	1.2705	1.91211	0.597644	1.32978	0.884138	0.572529	1.80257	1.10497	0.891545	0.88513	0.983084	1.05739	0.912143	0.965248	1.31736	0.89993	2.65557	0.853511	0.769753
1611	0.712258	1.00811	0.50419	0.5563	0.585063	1.28305	0.812365	0.515955	0.664951	0.5402	0.598876	2.39855	0.668203	0.716529	1.19124	0.67168	0.943326	0.929651	0.907159	0.680799	0.694327	1.02542	1.54546	1.13773	0.829559	0.928676	0.613997	0.384325	1.11361	1.37424	0.536826	1.33121	0.784507	1.47257	0.752556	1.47188	1.10758	0.903671	1.10834	1.02175	1.43808	0.677773	0.490784	0.51247	1.7028	1.47177	0.79643	2.05875	1.26286
1620	0.986539	0.884546	0.976681	1.00802	0.994321	1.04164	0.983526	0.88658	0.957331	1.07333	0.940947	1.13979	0.968425	1.01189	1.08012	1.2743	0.963761	0.809838	0.995903	1.1066	0.969989	1.22876	0.916995	1.18893	0.898968	1.67628	1.08548	0.841494	0.956099	0.862145	1.18564	1.17989	0.869223	0.867299	1.19739	0.998126	0.734199	2.58631	1.89787	1.06777	1.11266	1.16995	1.0051	0.969531	1.14241	1.1189	1.03832	1.08041	0.947793
1623	0.257955	0.657363	0.510883	0.744005	0.596857	0.373589	0.677687	0.58043	0.199567	1.42061	0.694906	0.550889	0.458271	0.321198	2.30725	0.62027	1.06287	1.48151	0.471763	0.414448	1.47044	0.54918	0.978111	1.515	1.25062	1.11247	0.662956	1.34972	1.06613	0.390528	1.86489	0.53836	0.613888	1.40197	1.16826	0.614421	1.91157	1.23518	1.00526	1.22208	0.818428	1.16755	0.687672	0.856136	0.582804	0.651274	0.509872	0.732281	1.63723
1624	0.927528	0.977092	0.831907	1.27546	1.10111	0.80961	0.357248	0.922636	1.45523	1.0896	1.04729	1.32115	1.11752	0.887919	1.99501	1.32563	0.917246	0.463422	0.375681	1.01774	0.952024	2.27198	1.89331	0.928295	1.95415	0.93583	1.01911	1.13751	1.5908	0.513129	1.03792	1.6994	0.768643	0.99545	1.1218	1.60262	1.77352	1.58362	0.971023	1.43039	1.95446	1.17217	1.12953	0.829319	1.65044	1.43929	0.892025	1.70645	0.80617
1627	1.10991	1.41503	1.67972	1.84658	1.63229	1.76866	1.32253	1.50186	1.18618	1.1955	1.14757	1.78985	1.72675	2.20728	1.02038	1.82041	1.06051	1.7776	1.65236	1.49987	1.26724	1.1575	2.40258	1.45799	1.21482	1.82855	1.53431	1.10415	1.6062	2.27181	1.23781	1.22331	1.18085	1.33684	1.62055	0.912669	0.847582	1.36585	1.21591	0.941009	1.72196	1.3139	1.575	1.19985	1.98891	2.49743	1.5371	0.991979	0.85799
1629	0.642903	0.674633	0.814206	0.838992	0.633613	0.662605	0.697729	0.568453	0.740904	0.962286	0.827538	0.99706	1.08749	1.34967	0.766683	0.85149	0.717891	0.762995	0.752403	0.916274	0.827667	0.726726	1.46901	0.921981	0.706025	0.86763	0.694036	1.0122	0.866498	0.936037	0.714328	0.740431	0.817647	0.863961	0.854063	0.667625	0.823758	1.51805	1.07009	0.829291	0.981741	0.948323	0.684011	0.813882	1.21048	1.15342	1.26934	1.03464	0.597804
1631	0.243746	0.578107	0.63904	0.553654	0.589937	0.327292	0.500086	0.796448	0.234351	1.16845	0.666298	0.49794	0.432245	0.509853	0.487338	0.536982	1.14583	1.29187	0.29044	0.337977	1.35976	0.443323	1.28273	1.89049	1.1276	0.913478	0.500532	1.20375	0.72187	0.279155	1.69122	0.680612	0.759595	1.66968	0.955869	0.510859	1.54315	0.582608	0.948191	1.17606	0.827582	1.25834	0.612948	1.04973	0.588461	0.5756	0.521083	0.698582	1.9048
1632	0.197265	0.694966	0.586768	1.0386	0.709425	0.381357	0.749882	0.638402	0.339533	1.70255	0.733149	0.675454	0.524817	0.388305	0.686402	0.632018	1.14687	1.32861	0.431327	0.341146	1.75381	0.692975	1.00971	1.50998	1.05778	1.07121	0.696303	1.37659	1.1354	0.367332	1.91532	0.671446	0.656098	1.36706	1.38228	0.6106	1.67273	1.15965	0.989946	1.22415	0.786192	1.04634	0.552556	0.905105	1.06529	0.760712	0.586927	0.924085	1.86812
1638	0.228886	0.445491	0.575384	0.523884	0.538509	0.296922	0.454464	0.665666	0.291824	1.04553	0.697636	0.450199	0.40154	0.380282	0.40974	0.518384	1.06977	1.24969	0.241383	0.265801	1.2646	0.382765	1.13806	1.94164	1.04858	0.858103	0.415007	1.16061	0.580989	0.265268	1.79382	0.601626	0.765354	1.51771	0.809694	0.43015	2.18102	0.617879	0.848021	0.944668	0.832769	1.28744	0.525484	0.853552	0.589691	0.469793	0.58287	0.611551	1.72632
1639	0.87374	0.80772	1.03875	1.00809	0.739981	1.55024	0.856664	1.83616	0.227387	1.4069	0.770137	0.933505	1.26609	1.18415	2.10554	0.943614	1.84877	0.967196	0.869724	1.06577	0.860081	1.10045	2.39104	1.09303	0.625996	1.25949	0.984006	0.633414	0.809906	0.640069	1.11155	1.36805	0.685581	1.44713	0.748676	0.567292	0.810956	1.03765	1.07217	0.866985	1.05762	1.396	1.31089	0.806961	0.757288	0.674349	0.840917	1.33607	1.07179
1641	0.297121	0.415638	1.05637	0.606874	0.484556	0.516427	0.506423	0.964166	0.357065	0.932826	0.714639	0.36073	0.606645	2.75993	0.342626	0.780864	0.915237	0.861153	0.40366	0.323678	1.22655	0.406094	1.15791	1.7883	1.04299	0.745595	0.478798	0.761019	0.358279	4.71547	1.13466	1.09143	1.18374	1.64043	1.01531	0.292209	1.89938	0.782559	0.768169	0.911768	1.88216	1.32693	0.517539	0.820417	0.521285	0.476206	1.46897	0.538143	1.25587
1642	0.688599	0.879675	0.945055	1.01356	0.82907	0.56852	0.787832	0.901887	0.46456	1.77362	1.02834	0.98951	1.08036	0.796992	0.99025	0.902776	1.29739	1.45754	1.20478	0.600308	2.24559	0.977374	1.22178	1.57489	1.72235	1.4187	0.966313	1.39373	1.6	0.588815	1.76038	1.04088	0.884633	1.9763	2.20844	0.764206	2.22773	1.00144	1.17876	1.12606	1.31722	1.55657	0.859979	1.20803	1.08012	1.39445	1.28863	1.28141	1.73153
1647	0.938992	0.652795	0.903705	1.13713	0.824123	0.899311	0.611344	0.826033	0.85922	0.844108	0.963236	1.12089	1.35858	1.4663	0.865518	0.987448	0.879435	0.989292	0.868762	1.06803	0.890593	0.626521	1.33962	0.862353	0.64137	0.991743	0.713366	0.973338	0.949462	1.24781	0.779812	0.781061	0.672213	0.846056	0.88403	0.661576	0.702344	1.57618	0.763897	0.516613	0.919676	1.09585	0.711568	1.05474	1.27054	1.40786	1.47025	0.744672	0.535184
1651	0.974212	1.01624	1.13045	1.99183	0.99192	1.12727	1.14162	1.34962	1.10514	1.64995	1.1045	1.36162	1.67326	1.40797	0.805616	1.43957	0.883923	0.978595	1.1138	1.06977	0.838094	1.06183	1.39355	1.50561	0.847208	1.56036	1.07115	1.10187	1.56183	1.79234	1.10961	1.195	0.707581	1.79767	1.11753	0.789388	1.26289	2.53568	0.908396	0.970425	1.73441	1.40643	1.15023	1.26526	1.63665	1.33217	1.58596	0.886229	0.92349
1652	0.577801	0.565779	0.582802	0.748321	0.781661	0.776732	0.596459	0.725817	0.740717	0.77351	0.848062	1.09788	1.06818	0.967829	0.716594	0.832174	0.655495	0.635314	0.693283	0.693394	0.631441	0.599135	1.08608	0.720469	0.568071	0.919433	0.629183	0.659412	0.837185	0.774111	0.658308	0.705207	0.459698	0.59751	0.776426	0.666144	0.534179	0.750571	0.631303	0.502448	0.676453	0.745837	0.583463	0.874269	1.41627	1.06361	0.920826	0.763116	0.491233
1653	0.566732	0.715372	0.483461	0.760266	0.584786	0.342113	0.644181	0.636938	0.123382	1.30739	0.720996	0.520488	0.51183	0.58525	1.71227	1.03897	0.890111	1.41801	0.771723	0.784435	1.3855	0.616829	0.752329	1.56519	0.973993	1.06452	0.634919	1.29275	1.05078	0.37877	1.9785	1.19161	0.57751	1.53872	1.1905	0.656179	1.89772	1.25455	0.955386	1.35984	0.925762	0.909625	0.637292	0.839947	0.617108	1.06018	0.502179	0.745406	1.26568
1658	1.67508	1.53649	0.947953	1.00806	0.875898	2.23699	0.834469	1.43034	1.23266	1.13565	1.38963	1.31826	4.27805	1.82867	0.976826	1.31033	1.21699	1.1188	1.013	1.23224	4.74516	1.50857	1.77792	1.36145	1.24441	1.26333	1.70926	1.38969	2.11098	3.48249	1.1856	1.33055	0.991279	1.01691	1.18983	1.53064	1.18808	1.13998	1.08515	1.25975	1.79096	1.03425	1.15919	1.12032	1.04401	1.18604	1.40374	1.5117	0.956105
1659	1.37838	2.76728	1.80139	1.1085	1.54107	3.32084	0.977688	1.01286	1.48267	1.21243	2.41295	1.40348	9.27777	1.69908	0.934997	2.23963	0.886796	1.00339	1.28634	1.87494	8.1493	2.45928	2.51619	1.24183	1.98465	1.59319	2.16124	2.82341	3.30622	4.21006	0.883623	2.86105	1.2711	2.14506	1.30931	2.19361	1.4165	1.81479	1.56754	0.522102	6.22147	0.893837	1.80284	0.949416	1.46014	1.06056	2.09313	1.1019	1.34456
1661	1.46025	2.78728	1.93525	1.03486	1.15118	5.89793	0.864174	1.17858	2.07835	1.20483	1.77591	1.44688	9.07317	2.04295	0.768796	1.77399	0.940147	1.39161	1.34591	1.81968	8.75483	1.31107	2.41691	1.24725	1.26449	1.28985	1.77778	2.7486	3.52885	1.98417	1.19984	1.86071	1.07254	1.60394	1.24107	2.43382	1.44676	1.67406	1.69219	0.520297	1.86799	0.720544	1.30105	1.96007	1.43515	0.805462	2.93523	1.02099	1.25988
1662	1.28176	2.57914	2.68312	1.08628	1.17045	6.03355	0.739538	1.11844	1.76925	1.40989	2.15969	1.08478	9.44747	2.00978	1.44668	1.69122	1.05899	0.950673	1.37994	1.82157	7.48152	1.05072	2.7612	1.18474	1.41369	1.45957	2.25694	2.61143	3.75222	1.89052	1.11209	1.63114	1.15311	2.95674	1.34199	2.47184	1.16966	1.36623	1.01769	1.09519	1.21063	1.06057	1.6564	1.23477	1.46232	0.836609	14.1657	1.02586	1.28461
1663	0.951299	0.87044	1.07614	0.766726	0.801302	0.945447	0.874099	1.07939	0.973799	0.811671	0.997373	0.445929	0.803719	0.944294	0.653184	0.950843	0.999029	0.812255	0.75813	0.854192	0.853608	0.938885	1.03037	1.22984	1.01326	0.9499	0.856917	1.03184	0.745484	0.720886	0.957483	0.98114	0.971577	1.05061	0.806344	0.753599	0.965361	0.633129	0.901529	0.93693	0.915603	1.14413	1.06501	1.07252	0.769473	0.49037	0.88403	0.69731	0.99016
1664	0.835255	1.05642	0.960879	0.987545	1.02362	1.00425	1.40179	0.951593	0.988832	0.935154	0.978891	0.538807	0.853125	1.00037	0.695521	0.992251	0.919593	1.23085	1.48698	0.998297	0.960248	1.00006	0.963231	1.06374	1.06152	1.00988	0.974548	1.02533	0.911326	1.17826	0.955019	0.962991	0.905669	0.983826	0.932435	0.859496	0.909254	1.01987	0.946593	0.974028	0.862182	1.11806	1.02469	1.03642	0.968015	0.536269	0.924151	0.718906	0.897714
1665	0.889848	0.826674	0.852577	0.734463	0.769635	0.76587	0.728815	0.644721	0.662696	0.758072	0.798559	0.859339	0.476954	0.677804	0.562182	0.710859	0.857302	0.818365	0.515258	0.761162	0.612037	0.657253	0.719765	0.599891	0.721676	0.717196	0.881176	0.627228	0.775467	0.687698	0.58134	0.584351	0.804087	0.753186	0.83653	0.994745	0.779306	0.737108	0.634121	0.721448	0.616369	0.631631	0.719633	0.761195	0.734084	0.679558	0.516562	0.572043	0.736192
1666	1.04269	0.999424	0.979444	0.895588	0.95189	0.831316	0.785601	0.836799	0.839253	0.922018	0.935083	1.15163	0.833027	0.768351	0.677404	0.771981	1.01527	1.05419	0.721959	0.894202	0.783908	0.749597	0.759165	0.867644	0.859285	0.822862	1.09714	0.762571	0.995851	0.913385	0.660145	0.659564	0.928234	0.942705	0.9136	1.15604	0.971329	0.718252	0.59807	0.787097	0.689898	0.861349	0.914308	0.807687	0.909515	0.823926	0.655799	0.639254	0.930321
1667	1.21178	1.52425	1.35667	1.91196	1.5514	1.43542	1.37484	1.32511	1.32964	1.40924	1.32315	1.90728	3.85941	1.40843	1.20573	1.21235	1.22913	1.11576	1.91139	1.58819	2.28205	1.47082	1.19513	1.23081	1.35036	1.85714	1.56461	1.50505	1.72521	1.71589	1.28684	1.39996	1.36909	1.25395	1.29309	1.22127	1.42658	1.40656	1.35973	1.14822	1.1787	1.38143	1.36647	1.22807	1.48359	1.80507	1.45244	1.2884	1.28801
1668	0.99708	1.13158	0.930124	1.69025	1.14105	1.04208	1.12129	1.29054	0.941626	1.24542	0.981748	1.44675	1.91753	1.15055	1.07085	1.22925	0.970862	0.935235	1.38744	1.23067	1.33855	1.22013	1.13683	1.1706	0.895742	1.45656	1.27548	1.04372	1.54425	1.79293	1.3578	1.29689	1.36049	1.04613	1.13117	0.970187	0.7971	1.10391	1.27414	1.04976	1.20829	1.09331	1.13555	1.11386	1.2585	1.44137	1.11516	1.0766	1.08781
1669	1.00092	1.04334	0.955217	1.04372	1.06563	1.04489	1.14169	0.845901	0.990339	0.927078	1.08703	1.18694	1.07279	0.914446	1.13086	1.1506	0.883513	0.909155	1.04913	1.11219	1.12429	1.26172	0.918005	0.963951	1.11533	1.16205	1.14602	1.17383	1.16187	1.04537	1.2311	1.19365	0.991528	1.04359	1.13691	1.16257	1.11335	1.02592	1.27457	1.38471	1.15734	0.918384	1.12012	1.17095	1.03611	1.23913	0.976004	1.35679	1.16877
1670	1.17489	0.978056	0.912658	0.976038	1.04055	0.993183	1.03785	0.812306	0.91406	0.905699	1.05765	1.14742	0.951967	0.859615	1.05468	1.00308	0.900648	0.981335	0.977001	1.0454	1.02586	1.12188	1.01942	0.978767	1.14752	1.16211	1.07498	1.08477	1.03637	0.865171	1.18972	1.08668	1.04068	1.22133	1.17713	1.18153	1.06031	1.15055	1.29089	1.22225	1.18167	1.07804	1.17934	1.16011	1.01623	1.2669	1.03543	1.27679	1.17317
1671	1.00215	1.37824	1.29189	1.29547	2.06279	2.1202	1.49608	0.785133	1.23431	1.7727	2.04684	2.35862	1.56716	1.0742	1.41652	1.51481	1.55719	1.16308	1.18703	1.26402	1.1877	1.3142	1.20866	0.770779	1.34103	0.806556	1.74828	0.816578	1.16054	1.19843	1.0789	1.22451	1.33693	1.0544	1.16861	1.84788	1.51678	1.34467	1.10061	1.33684	1.27306	0.848532	1.30006	1.2958	1.44086	0.739653	0.405694	1.36832	1.21762
1672	0.989534	1.23208	1.10746	1.17364	1.60345	1.49229	1.29523	0.894786	1.11579	1.58198	1.53712	1.95294	1.07378	1.04405	1.57925	1.36653	1.29337	0.944969	1.01001	1.12588	1.00235	1.28133	1.14207	0.679665	1.22284	0.848085	1.35409	0.86585	1.0406	0.99367	1.13511	1.25498	1.17537	0.993013	1.05631	1.50235	1.30738	1.13269	1.08933	1.31722	1.22003	0.736998	1.26659	1.1137	1.25065	1.01583	0.57754	1.29822	1.17209
1673	1.06416	1.15516	0.974062	1.06478	1.27583	1.11337	1.05183	1.04285	1.31741	0.89765	1.2864	1.38587	1.47129	0.849519	1.18577	0.99158	1.08478	0.769991	0.988946	1.15435	1.07305	1.23341	1.15007	0.984504	1.40721	0.80321	1.15682	1.13912	1.44472	1.14132	0.975784	1.36244	1.04124	0.846466	1.03706	1.16248	0.927865	0.807119	1.23737	1.0176	1.02587	0.884236	1.26583	1.26778	1.31894	1.23972	0.803606	1.27114	1.03254
1675	1.22337	1.52611	1.28035	1.40717	1.69139	1.39381	1.08918	1.0464	1.3508	1.45134	1.54979	1.92081	2.49084	1.06555	1.49204	1.38215	1.37089	1.35304	1.62655	1.37451	1.74726	1.64256	1.06861	1.34708	1.42929	1.36286	1.7979	1.23928	1.5807	1.3458	1.39969	1.66363	1.1374	1.26812	1.58246	1.61136	1.46791	1.52068	1.40266	1.32495	1.52138	1.58647	1.41157	1.34496	1.53096	1.32598	1.06859	1.68271	1.31978
1676	1.43311	1.63859	1.70147	1.70798	1.6507	1.17237	0.962251	1.07794	1.69053	1.52872	1.64826	1.82591	2.67799	1.6311	1.19151	1.1003	1.25009	1.79089	1.9099	1.38488	2.25442	1.09364	0.620569	1.10998	2.32445	1.69579	1.59024	1.41692	1.69233	1.52235	0.848146	0.920669	1.20696	1.52312	1.43934	1.62074	2.07351	1.16803	0.963893	0.925719	1.26896	1.75264	1.79773	1.17175	1.47627	1.74463	1.73393	1.07537	1.23383
1677	0.975133	1.29323	1.15246	1.24885	1.37151	1.08744	1.19687	0.815343	1.1479	1.18267	1.3367	1.55011	2.0977	0.78086	1.26576	1.11161	1.0982	1.45887	1.48586	1.17118	1.7074	0.962707	0.806311	0.877481	1.57837	1.38896	1.40272	1.13856	1.2433	1.12259	0.748837	0.96309	1.16159	1.11571	1.14935	1.66563	1.28213	1.16087	0.993275	0.99449	1.02842	1.4441	1.33538	0.91188	1.18502	1.20658	1.14489	1.23648	0.982773
1678	0.888016	0.88853	0.672839	0.801299	0.915203	0.842074	0.84988	0.735708	0.666456	0.750989	0.811528	0.945423	0.550802	0.67604	0.700437	0.745502	0.853732	1.14097	1.05179	0.860926	0.670385	0.76895	0.604237	0.749402	0.815582	0.691489	0.964832	0.660574	0.946294	1.13617	0.645709	0.63881	1.00921	0.884598	0.832731	1.05543	0.711824	0.803442	0.609254	0.756438	0.760485	0.788875	0.759834	0.758555	0.937153	0.749391	0.508087	0.661713	0.776161
1679	0.720931	0.742404	0.620973	0.770849	0.782207	0.738592	0.803844	0.542057	0.546373	0.64935	0.66007	0.600927	0.528618	0.603946	0.619231	0.54631	0.623405	0.768088	0.599291	0.726109	0.453937	0.635909	0.53642	0.513385	0.573451	0.642124	0.643155	0.654899	0.84654	0.64664	0.493857	0.45294	0.67891	0.491215	0.589687	0.728666	0.457638	0.743138	0.574265	0.562609	0.57943	0.541282	0.571352	0.63064	0.711092	0.54962	0.536443	0.576826	0.525447
1680	1.4561	1.57249	1.45954	1.61199	1.57968	1.01306	1.08871	1.00919	1.42476	1.51492	1.37509	1.74419	2.38464	1.24677	1.24875	1.14611	1.31775	1.57738	1.26865	1.1259	1.95799	1.08565	0.801344	0.990293	1.63392	1.75114	1.49745	1.43605	1.64427	1.25996	0.951586	1.02085	1.31118	1.37411	1.47033	1.67172	1.62154	0.938821	0.865291	1.01647	1.22354	1.75084	1.65487	1.17274	1.30666	1.77606	1.48968	1.19917	1.10684
1681	0.967472	1.08117	0.957338	1.02416	1.18165	1.02124	1.17473	0.719077	1.06397	1.1102	1.12598	1.28721	1.17292	0.91193	1.20567	1.09713	0.960468	1.1006	0.988818	0.998929	1.04786	1.03527	0.807959	0.850524	1.18779	1.14597	1.18993	0.978408	1.09219	0.882816	0.954869	0.921605	0.968716	1.03843	0.946102	1.16412	1.10265	1.16078	1.02922	1.07842	1.05761	1.19359	1.15318	0.943982	0.96761	1.15896	1.18723	1.20742	0.931175
1682	0.947487	0.947541	0.983081	0.892428	0.975302	0.738972	0.963345	0.632403	0.767477	0.763913	0.94469	1.0053	0.776729	0.687482	0.714375	0.686247	0.948618	1.26307	5.17689	4.45305	0.993348	0.809978	0.663276	0.664402	0.907876	0.71904	1.07389	0.641652	0.825837	0.88643	0.527778	0.574511	1.01447	0.952525	0.939155	1.11154	0.948397	3.19643	2.35895	0.777599	0.744427	1.01911	0.86531	0.755302	0.917433	0.69895	0.539943	0.680383	1.01285
1684	0.78096	0.701388	0.719649	0.656244	0.683413	0.695407	0.714496	0.538691	0.602411	0.723841	0.668027	0.835901	0.463107	0.745835	0.618085	0.646257	0.688445	0.838515	4.94178	3.46104	0.574381	0.657851	0.688856	0.574227	0.69068	0.570534	0.792657	0.568241	0.686753	0.799597	0.515279	0.534439	0.843616	0.751457	0.76565	0.840781	0.777396	1.25134	1.05701	0.634943	0.64201	0.641086	0.642235	0.631546	0.683137	0.587307	0.587187	0.671881	0.910313
1685	0.832439	1.00614	0.809115	0.879942	0.912995	0.770968	1.08027	0.568051	0.75392	0.860776	0.84451	0.942273	0.47286	0.50549	0.908689	0.772903	0.756003	0.718633	4.45623	3.35195	0.681469	0.849813	0.665005	0.510438	0.852983	0.65008	0.983026	0.636003	0.801984	0.716476	0.565096	0.65827	0.834363	0.718298	0.952228	1.16834	0.759994	2.25032	1.35445	0.809046	0.748593	0.513052	0.709193	0.732243	0.932017	0.828677	0.561893	0.809803	0.710762
1686	0.949772	1.00094	0.919562	0.917063	0.922666	0.840914	0.893029	0.872104	1.06682	0.920982	0.90329	1.00316	0.993042	0.930045	1.03257	0.996433	0.864986	0.840184	0.706136	0.932312	0.924827	0.925785	0.808131	0.932089	0.991379	1.22189	0.881078	1.07368	0.959855	0.765099	1.00207	0.970402	0.86158	0.93785	0.943602	0.960009	0.927303	0.876176	0.913541	0.981587	0.994455	1.06624	1.02345	0.922483	0.956706	1.49621	1.45427	1.03058	0.909406
1687	0.977775	0.903854	0.785761	0.933841	0.877836	0.883081	1.00976	0.935872	0.912564	0.951651	0.81682	1.04795	0.881709	0.95985	0.856673	0.816049	0.86677	1.19709	0.977895	0.955843	0.874129	0.747526	0.694629	0.908192	1.01224	1.05397	0.780157	1.06988	1.06445	2.11976	0.879088	0.768768	0.820652	0.914135	0.893093	0.891782	1.20016	0.639047	0.63451	0.943758	0.689797	1.0375	1.0461	0.818873	0.788141	1.1304	1.25093	0.857115	0.961005
1688	0.898296	1.19742	0.949484	1.1224	1.27884	1.14066	1.08621	0.816928	0.95883	1.15322	1.0885	1.43638	1.24603	1.00672	1.29525	1.15401	1.05157	1.03458	1.31198	1.13942	1.07156	1.19659	0.890721	0.985147	1.02051	1.13738	1.30817	1.01873	1.25261	0.986747	1.13989	1.16959	0.926389	1.05335	1.21124	1.23024	1.05075	1.28764	1.13169	1.18434	1.11732	1.17581	1.05369	1.07366	1.253	1.0571	0.84088	1.26191	0.980353
1689	0.951277	1.2309	1.10634	1.0874	1.33589	1.21245	1.00622	0.771936	1.08345	1.18093	1.19986	1.53728	1.27089	0.961041	1.182	1.23659	1.10813	1.0436	1.20013	1.10712	1.20943	1.16859	0.858566	0.894065	1.14304	1.11018	1.39746	0.928848	1.21028	0.935579	1.0765	1.35517	0.970687	0.955107	1.15587	1.26198	1.25429	1.07618	1.14629	1.16101	1.06364	1.18149	1.10054	1.04594	1.21926	1.02351	0.803688	1.17214	0.999153
1690	1.2283	1.18967	1.02703	1.02971	1.1358	1.12766	1.23478	0.895987	1.0836	0.98147	1.07145	1.29837	0.837319	0.864705	1.37934	0.954053	1.10827	1.14347	0.879551	1.2534	1.10977	1.62991	1.09239	1.05326	1.16268	0.838701	1.23594	0.970197	1.12419	0.986633	1.16696	1.24544	1.2555	1.04898	1.13529	1.23147	1.03379	0.873512	1.27633	1.3431	1.36981	1.06895	1.31595	1.11913	1.21861	1.32212	1.18115	1.57583	1.18461
1691	1.05749	1.21789	1.09911	1.0366	1.31841	1.07219	1.27225	0.822929	1.12127	1.08933	1.2301	1.43169	1.01507	0.777428	1.53489	0.742091	1.1509	1.15174	0.945702	1.27644	0.944268	1.672	0.83328	1.03936	1.06778	0.910232	1.45872	0.895906	1.20799	0.952913	0.906403	0.921919	1.14129	1.08035	1.15099	1.28824	1.15068	0.612831	1.02521	1.28088	1.27837	1.07564	1.32428	1.06831	1.16943	1.13189	0.684018	1.68156	1.11807
1692	0.516642	0.691643	0.670985	0.619921	0.775435	0.792804	1.49347	0.67796	0.954125	0.80961	1.04566	0.758608	0.900798	0.658471	0.891553	0.886829	0.916609	1.63342	1.97618	0.823482	0.778176	0.891848	0.78174	0.971807	1.1485	0.732009	1.15578	0.821958	0.922085	1.46099	1.19241	0.857821	0.608837	0.994844	0.927936	0.969664	0.986192	2.1138	0.690429	0.841044	0.789296	0.894555	1.09259	0.828768	0.810453	0.757329	0.835765	1.14907	1.00472
1693	0.668635	0.846062	1.09843	0.654426	0.800938	1.01959	0.991547	0.904087	1.03868	1.09878	1.33617	1.11559	1.48353	1.02055	0.938118	1.1204	1.04195	1.29215	1.27256	0.914954	0.728828	1.12331	1.23119	0.989676	1.05105	1.34376	1.86054	0.858686	0.845392	1.21462	1.1326	0.994033	0.877653	1.27335	1.08765	0.945347	1.26974	1.08128	1.04007	1.10283	0.916668	1.12667	0.999391	1.08683	0.883396	1.0676	0.859527	1.05327	0.93247
1694	1.28755	1.28915	1.03988	1.0688	1.15686	0.99824	1.06591	1.08242	1.0478	0.96515	1.2501	1.35288	1.15718	0.942183	1.05112	1.01732	1.27747	0.893541	0.776498	1.07528	1.05432	1.16974	1.12192	1.03341	1.30519	0.84683	1.28454	1.26357	1.22991	0.907024	0.983936	1.17518	1.10291	0.920337	0.991652	1.20343	1.03205	0.853015	1.0747	1.26135	0.993172	0.883523	1.39744	1.27727	1.30199	1.25211	0.97163	1.24981	1.35123
1695	1.1877	1.01028	0.932186	0.97026	0.871914	0.78211	0.728714	1.09372	0.981964	0.909198	1.01698	0.944646	0.828225	0.997513	0.820773	0.970559	1.02489	0.729182	0.64299	0.87615	0.812141	0.853152	0.959182	1.18725	1.14787	1.24949	0.988237	1.15634	0.991143	0.806445	0.972123	1.24546	1.00598	0.920176	1.01924	0.9977	0.936904	0.782996	0.832316	1.09539	0.889856	0.913548	0.988309	1.03286	1.15583	1.29359	1.03027	0.917404	1.26977
1696	1.30301	1.42444	1.17466	1.16222	1.36333	1.22551	1.14995	1.01249	1.12555	1.10383	1.38847	1.45768	1.56562	1.0032	1.1503	1.16608	1.43701	0.968134	0.929702	1.26061	1.34619	1.27782	1.14085	1.02405	1.31436	0.882362	1.46107	1.19433	1.31692	1.00696	0.989918	1.23609	1.15211	1.02086	1.08867	1.33071	1.13583	0.943271	1.15188	1.38733	1.12065	0.958754	1.47677	1.30701	1.44519	1.20838	0.819858	1.34299	1.4255
1697	1.29836	1.18782	1.09888	1.20377	1.07392	0.872381	0.974227	1.06529	1.11185	1.11978	1.14831	1.16253	1.01697	0.99625	0.964294	1.14746	1.17963	0.848743	0.725429	1.09748	0.917481	1.07182	0.907645	1.25542	1.14603	1.27468	1.22588	1.0248	1.0731	0.834292	0.949358	1.44559	1.08558	1.00673	1.16302	1.18704	1.10761	0.879973	1.08228	1.02798	1.07313	0.930462	1.14699	1.05661	1.30938	1.21452	0.909373	1.13601	1.40808
1698	1.26988	1.20955	1.06333	1.03717	1.13972	1.0886	1.10118	0.982276	1.1312	1.00801	1.11479	1.30349	1.26395	0.971929	1.26317	1.13585	1.23123	0.861469	0.848699	1.18392	1.20195	1.39972	1.24765	1.15627	1.20788	1.05876	1.27484	1.19478	1.23407	0.965936	1.14014	1.35986	1.12114	0.984517	1.05508	1.17652	1.07149	0.921609	1.29743	1.27013	1.20177	1.13366	1.24319	1.16837	1.31173	1.45738	1.06109	1.37999	1.31541
1699	1.25247	1.23041	1.18433	0.988352	1.11183	1.13181	1.03273	0.993737	1.08552	1.04925	1.18966	1.33469	1.43065	0.949695	1.23052	1.1647	1.29416	0.748571	0.678037	1.13483	1.17096	1.39673	1.30826	1.20392	1.04012	1.11612	1.35481	1.04104	1.074	0.879415	1.01655	1.36589	1.20432	1.0462	1.01652	1.14525	1.15498	0.834022	1.31205	1.22597	1.2403	1.16481	1.11913	1.1629	1.19861	1.27431	0.660898	1.33889	1.29653
[truncated: 79 more columns]
