# Supplementary material for: Serum Proteome Analysis for Profiling Predictive Protein Markers Associated with the Severity of Skin Lesions Induced by Ionizing Radiation
Source: Proteomes. 2013 Jul 10;1(2):40–69. doi: 10.3390/proteomes1020040 (PMC5302747; doi:10.3390/proteomes1020040)
Supplement: Supplementary File 3 [file proteomes-01-00040-s003.xls]

## Sheet: Supplemental Table S3
Supplemental Table S3. Proteins identified by MS or MS/MS, database searches, fold changes and statistical test results
Spot no.1	Identification method (mass spectrometer)	MASCOT score	Number of aligned peptides (MS)	Protein sequence coverage (MS)	Expected p-value (MS)	Matching peptides (MS/MS)	Protein sequence coverage (MS/MS)	Protein name	Abreviation	SwissProt ID	Theorical values		Experimental values		all CTRL vs. all IR				CTRL vs. all IR at day 3				CTRL vs. all IR at day 7				20 Gy vs. 40 Gy vs. 80 Gy at day 3				20 Gy vs. 40 Gy vs. 80 Gy at day 7				20 Gy vs. (40 Gy + 80 Gy) at day 3				(20 Gy + 40 Gy) vs. 80 Gy at day 3				20 Gy vs. (40 Gy + 80 Gy) at day 7				(20 Gy + 40 Gy) vs. 80 Gy at day 7
											Mw (kDa)	pI	Mw (kDa)	pI	Fold change2	p-value 4	q-value 4	Power 4	Fold change2	p-value 4	q-value 4	Power 4	Fold change2	p-value 4	q-value 4	Power 4	Fold change3	p-value 4	q-value 4	Power 4	Fold change3	p-value 4	q-value 4	Power 4	Fold change3	p-value 4	q-value 4	Power 4	Fold change3	p-value 4	q-value 4	Power 4	Fold change3	p-value 4	q-value 4	Power 4	Fold change3	p-value 4	q-value 4
1668	MALDI-TOF (Voyager DE-PRO )	90	9	0.29	1.6e-005			Actin, cytoplasmic 1	ACTB	ACTB_MOUSE	42	5.29	38	5.34	1.0019	0.948176	0.752164	0.0506383	0.945447	0.369807	0.333865	0.176843	1.06413	0.369413	0.361851	0.177059	0.803534	0.00853639	0.430043	0.812092	0.910203	0.423505	0.272086	0.191367	0.854939	0.0157766	0.434776	0.739925	0.843011	0.00446165	0.293974	0.87393	0.991556	0.767109	0.579368	0.06104	0.927248	0.207576	0.483569
425	MALDI-TOF (Voyager DE-PRO )	79	14	0.21	0.00021			Afamin	AFAM	AFAM_MOUSE	69	5.54	85	4.89	1.04476	0.0800371	0.304433	0.524829	1.0408	0.297962	0.333865	0.222443	1.04874	0.156207	0.361851	0.371543	1.04525	0.467549	0.430043	0.173446	1.11125	0.0178625	0.260658	0.73123	1.02774	0.321077	0.434776	0.180608	1.03993	0.255703	0.457259	0.223056	1.01488	0.750181	0.566583	0.0627747	1.08938	0.00928783	0.45605
438	MALDI-TOF (Voyager DE-PRO )	75	15	0.16	0.00049			Afamin	AFAM	AFAM_MOUSE	69	5.54	83	4.93	1.05947	0.0138995	0.134472	0.815587	1.10488	0.00112271	0.0456075	0.972819	1.01731	0.737586	0.578426	0.0669354	1.12565	0.00163531	0.331351	0.925778	1.14008	0.0088532	0.260658	0.808583	1.03149	0.320386	0.434776	0.180996	1.10881	0.000468603	0.118979	0.974453	1.09577	0.0149273	0.321485	0.74736	1.11148	0.00490212	0.39999
468	MALDI-TOF (Voyager DE-PRO )	128	20	0.27	2.6e-009			Afamin	AFAM	AFAM_MOUSE	69	5.54	82	4.98	1.05544	0.161993	0.319934	0.364067	1.13751	0.00380783	0.0639377	0.927565	0.98447	0.607841	0.476678	0.0902308	1.17812	0.00531665	0.430043	0.8534	1.19098	0.0542978	0.260658	0.570045	1.01821	0.774906	0.748692	0.060288	1.13851	0.00343309	0.291813	0.893217	1.16111	0.0180625	0.321485	0.721112	1.11764	0.105952	0.483569
919	MALDI-TOF (Voyager DE-PRO )	56	5	0.24	0.037			Alpha-1-acid glycoprotein 1	A1AG1	A1AG1_MOUSE	24	5.58	36	4.22	0.873945	9.14866e-05	0.00449959	0.99623	0.907644	0.00664015	0.0879617	0.891186	0.843675	0.00374181	0.158177	0.928516	0.944877	0.42784	0.430043	0.189509	0.936842	0.518662	0.33322	0.154999	1.00933	0.829882	0.801808	0.0557903	0.962466	0.314003	0.457259	0.184629	0.944863	0.274322	0.321485	0.209651	0.959444	0.391114	0.483569
357	MALDI-TOF (Voyager DE-PRO )	69	6	0.2	0.0019			Alpha-1-antitrypsin 1-1	A1AT1	A1AT1_MOUSE	46	5.44	104	4.55	0.919817	0.0372964	0.210503	0.674326	0.858761	0.0133111	0.120594	0.825588	0.987991	0.670675	0.525953	0.0774404	0.986062	0.964699	0.862984	0.0550859	0.820888	0.0200512	0.260658	0.71667	0.989253	0.818315	0.790633	0.0566226	0.999409	0.994173	0.994173	0.0500066	0.860965	0.0166132	0.321485	0.732847	0.989673	0.981675	0.974595
683	MALDI-TOF (Voyager DE-PRO )	72	7	0.23	0.0011			Alpha-1-antitrypsin 1-2	A1AT2	A1AT2_MOUSE	46	5.32	51	5.03	0.853947	0.0146048	0.139027	0.809886	0.76818	0.0148893	0.123274	0.812575	0.952712	0.416329	0.361851	0.153507	0.741814	0.0240448	0.430043	0.692736	0.875828	0.170782	0.260658	0.363373	0.811678	0.0275613	0.434776	0.656627	0.788516	0.0131338	0.293974	0.763986	0.884421	0.0608961	0.321485	0.51412	0.925327	0.256745	0.483569
713	MALDI-TOF (Voyager DE-PRO )	77	8	0.31	0.00032			Alpha-2-HS-glycoprotein	FETUA	FETUA_MOUSE	37	6.04	48	5.33	1.00243	0.990583	0.785804	0.0500211	1.11154	0.0109874	0.109162	0.846215	0.900599	0.00965661	0.226905	0.858967	1.04039	0.591853	0.52945	0.132122	1.07818	0.34722	0.260658	0.228125	1.02565	0.468861	0.453	0.118085	1.03475	0.31969	0.457259	0.181387	1.04998	0.261208	0.321485	0.218968	1.06656	0.171366	0.483569
849	MALDI-TOF (Voyager DE-PRO )	72	6	0.22	0.001			Alpha-2-HS-glycoprotein	FETUA	FETUA_MOUSE	37	6.04	41	4.52	0.936413	0.0519391	0.247212	0.613545	1.02955	0.476612	0.394603	0.128702	0.851287	0.000838453	0.117041	0.978853	0.899122	0.12079	0.430043	0.428755	0.941955	0.407715	0.261941	0.198325	1.08429	0.0639283	0.434776	0.504618	1.00027	0.882978	0.882978	0.052712	1.0599	0.177974	0.321485	0.295213	1.02654	0.506429	0.502777
996	MALDI-TOF (Voyager DE-PRO )	80	9	0.06	0.00018			Alpha-2-macroglobulin	A2M	A2M_MOUSE	166	6.24	34	5.37	1.04295	0.909334	0.721352	0.0519609	1.06183	0.514563	0.426025	0.115651	1.0282	0.615674	0.482821	0.0884648	0.670253	0.00270981	0.331351	0.899568	0.732657	0.306283	0.260658	0.251754	0.676642	0.000544978	0.164808	0.971235	0.817877	0.106605	0.457259	0.401147	1.21473	0.747759	0.564753	0.0630346	0.900309	0.254282	0.483569
1009	MALDI-TOF (Voyager DE-PRO )	65	7	0.05	0.0055			Alpha-2-macroglobulin	A2M	A2M_MOUSE	166	6.24	33	5.58	1.00401	0.848364	0.672986	0.0555405	1.01886	0.569576	0.471572	0.0996308	0.990971	0.621133	0.487102	0.0872644	0.775044	0.00330909	0.346343	0.88731	0.786392	0.257965	0.260658	0.284425	0.798863	0.000874141	0.198474	0.958744	0.926942	0.295304	0.457259	0.19587	1.1003	0.835538	0.631049	0.0554048	0.868091	0.190453	0.483569
1010	MALDI-TOF (Voyager DE-PRO )	61	9	0.06	0.013			Alpha-2-macroglobulin	A2M	A2M_MOUSE	166	6.24	33	5.86	0.972798	0.384211	0.319934	0.170229	1.01209	0.837281	0.693213	0.0563218	0.934594	0.220769	0.361851	0.290259	0.858591	0.0533975	0.430043	0.572802	0.902585	0.283816	0.260658	0.266214	0.896575	0.0358672	0.434776	0.61218	0.887634	0.0372809	0.457259	0.605397	0.92559	0.218025	0.321485	0.254261	0.926396	0.136711	0.483569
1695	MALDI-TOF (Voyager DE-PRO )	97	13	0.27	2.9e-006			Antithrombin-III	ANT3	ANT3_MOUSE	52	6.1	56	4.86	1.09868	0.00317297	0.0553748	0.93151	1.09226	0.0572353	0.236935	0.595855	1.10534	0.0248687	0.299517	0.74336	1.08356	0.251036	0.430043	0.28963	1.13528	0.018507	0.260658	0.726821	1.04722	0.257041	0.434776	0.222053	1.07769	0.103742	0.457259	0.406769	1.05568	0.232734	0.321485	0.241359	1.12889	0.00461958	0.39999
1697	MALDI-TOF (Voyager DE-PRO )	76	12	0.26	0.00036			Antithrombin-III	ANT3	ANT3_MOUSE	52	6.1	54	4.93	1.02262	0.422376	0.335061	0.151706	1.00289	0.97649	0.808469	0.0501297	1.04374	0.256116	0.361851	0.256173	1.02669	0.777652	0.695659	0.0873868	1.14382	0.00522882	0.260658	0.854713	1.02334	0.47755	0.461395	0.115386	1.01653	0.681941	0.681941	0.0712752	1.00606	0.919525	0.694481	0.0512764	1.10757	0.00456985	0.39999
648	MALDI-TOF (Voyager DE-PRO )	76	9	0.27	0.00041			Antithrombin-III	ANT3	ANT3_MOUSE	52	6.1	55	4.99	0.999546	0.914235	0.72524	0.0517536	0.969797	0.362768	0.333865	0.180752	1.03147	0.479038	0.375669	0.127813	1.02984	0.766975	0.686108	0.0895566	1.14116	0.00960363	0.260658	0.800572	1.00221	0.802188	0.775051	0.0578831	1.02335	0.470655	0.470655	0.117521	0.998814	0.878161	0.66324	0.0529422	1.10159	0.0114203	0.45605
1335	LC-MS/MS (Q-Exactive)					31	0.61	Apolipoprotein A-I	APOA1	APOA1_MOUSE	31	5.51	23	4.23	1.00998	0.829921	0.658356	0.0569985	1.00776	0.941444	0.779454	0.0508059	1.01215	0.700637	0.54945	0.0723686	0.973507	0.956824	0.85594	0.0562585	0.79062	0.00296424	0.260658	0.894203	0.975359	0.819063	0.791356	0.056567	0.984727	0.958562	0.958562	0.0503373	0.792203	0.000600321	0.141914	0.96899	0.886604	0.100297	0.483569
1080	MALDI-TOF (Voyager DE-PRO )	64	5	0.16	0.0058			Apolipoprotein E	APOE	APOE_MOUSE	36	5.56	30	5.59	0.928519	0.189279	0.319934	0.327499	1.04107	0.572563	0.474045	0.0988487	0.837688	0.00997727	0.226905	0.855823	1.05917	0.674388	0.603283	0.110256	0.921232	0.565371	0.363229	0.139974	1.05513	0.375998	0.434776	0.153096	1.03279	0.589634	0.589634	0.0871885	1.06708	0.310612	0.321485	0.1866	1.00566	0.84044	0.834378
1099	MALDI-TOF (Voyager DE-PRO )	151	21	0.49	1.3e-011			Apolipoprotein E	APOE	APOE_MOUSE	36	5.56	29	5.46	0.923392	0.158099	0.319934	0.369783	1.03993	0.509957	0.422211	0.117141	0.831006	0.00997558	0.226905	0.85584	1.09372	0.337437	0.430043	0.233485	1.08634	0.493361	0.316965	0.163844	1.08799	0.140033	0.434776	0.344615	1.05051	0.394997	0.457259	0.144898	1.06673	0.285338	0.321485	0.202252	1.06133	0.320236	0.483569
1106	MALDI-TOF (Voyager DE-PRO )	212	25	0.53	1e-17			Apolipoprotein E	APOE	APOE_MOUSE	36	5.56	29	5.58	0.919331	0.109651	0.319934	0.454783	1.02174	0.728611	0.603242	0.0681753	0.838455	0.00663538	0.183628	0.891241	1.12183	0.249473	0.430043	0.290825	1.05847	0.522541	0.335713	0.153689	1.10822	0.103655	0.434776	0.406944	1.07116	0.251817	0.457259	0.226008	1.05644	0.253351	0.321485	0.224836	1.03043	0.519278	0.515533
626	MALDI-TOF/TOF (4800 Proteomics analyzer)+LC-MS/MS (FT-ICR)					11	0.38	Beta-2-glycoprotein 1	APOH	APOH_MOUSE	39	7.92	60	5.75	1.08194	0.0281641	0.201077	0.720594	1.08238	0.111523	0.328957	0.450441	1.08148	0.133998	0.361851	0.407671	1.18507	0.00820146	0.430043	0.81589	1.12106	0.191293	0.260658	0.341695	1.10681	0.0933456	0.434776	0.428494	1.16839	0.00187877	0.219816	0.928553	1.09835	0.0869829	0.321485	0.442925	1.08021	0.162581	0.483569
938	MALDI-TOF/TOF (4800 Proteomics analyzer)					2	0.09	Clusterin	CLUS	CLUS_MOUSE	52	6.04	36	4.31	0.915618	0.0131005	0.134472	0.822228	0.9622	0.426192	0.352859	0.149063	0.87055	0.00283719	0.142998	0.942191	0.834773	0.0742378	0.430043	0.516836	0.937004	0.54945	0.353001	0.144918	0.928375	0.283437	0.434776	0.203503	0.839742	0.0218691	0.371775	0.692998	0.944778	0.281487	0.321485	0.204797	0.983532	0.732426	0.727143
1036	MALDI-TOF (Voyager DE-PRO )	61	5	0.11	0.013			Clusterin	CLUS	CLUS_MOUSE	52	5.46	31	5	1.06022	0.0214564	0.170209	0.760737	1.08974	0.0130238	0.118611	0.828037	1.03099	0.399537	0.361851	0.161459	1.14598	0.00211546	0.331351	0.913232	1.07661	0.213859	0.260658	0.320331	1.09895	0.00742791	0.434776	0.828518	1.11699	0.00112457	0.185815	0.950331	1.05009	0.234238	0.321485	0.240094	1.06407	0.085312	0.483569
1042	LC-MS/MS (LCQ Deca IonTrap )	63				2	0.04	Clusterin	CLUS	CLUS_MOUSE	52	5.46	32	4.8	1.11405	0.00595458	0.0829334	0.893597	1.12344	0.0375241	0.186405	0.675937	1.10444	0.0712778	0.361851	0.550247	1.18454	0.0200448	0.430043	0.716711	1.15751	0.0676858	0.260658	0.532865	1.12022	0.0647656	0.434776	0.502061	1.15233	0.00610653	0.293974	0.84727	1.11799	0.0481151	0.321485	0.559076	1.11382	0.0419779	0.483569
1096	MALDI-TOF (Voyager DE-PRO )	61	5	0.11	0.013			Clusterin	CLUS	CLUS_MOUSE	52	5.46	30	5.4	0.863961	2.55202e-06	0.000584577	0.999887	0.871426	0.00224417	0.05156	0.951936	0.856742	0.000399385	0.117041	0.98913	0.950187	0.556419	0.497752	0.142732	0.946661	0.578486	0.371656	0.136029	0.967615	0.411394	0.434776	0.138289	0.957347	0.304039	0.457259	0.190505	0.954861	0.317835	0.321485	0.182436	0.98945	0.830526	0.824536
1669	MALDI-TOF (Voyager DE-PRO )+MALDI-TOF/TOF (4800 Proteomics analyzer)+LC-MS/MS (FT-ICR)					12	0.22	Clusterin	CLUS	CLUS_MOUSE	52	5.46	31	5.12	1.05329	0.0451507	0.241517	0.640057	1.10117	0.00372317	0.0639377	0.928786	1.00647	0.873635	0.685118	0.0537851	1.1097	0.0222029	0.430043	0.703396	1.09058	0.128319	0.260658	0.417462	1.07367	0.0380287	0.434776	0.601887	1.08921	0.00927986	0.293974	0.805124	1.05671	0.16894	0.321485	0.305879	1.07827	0.0474452	0.483569
1670	MALDI-TOF (Voyager DE-PRO )	61			0.012	5	0.13	Clusterin	CLUS	CLUS_MOUSE	52	5.46	31	5.12	1.06982	0.013816	0.134472	0.816272	1.15725	2.32695e-05	0.00905483	0.999404	0.983351	0.571451	0.44814	0.0991391	1.20783	5.68143e-07	0.000238873	0.99993	1.06585	0.183634	0.260658	0.349514	1.15906	3.04205e-06	0.0013814	0.999811	1.14471	2.26601e-05	0.0208677	0.998333	1.02134	0.551236	0.416327	0.0955952	1.05983	0.0692489	0.483569
1015	MALDI-TOF (Voyager DE-PRO )	55	6	0.15	0.047			Clusterin	CLUS	CLUS_MOUSE	52	5.46	32	4.89	1.11777	0.0013445	0.0330633	0.963906	1.13391	0.0212788	0.14771	0.766113	1.10142	0.0270076	0.317696	0.730697	1.1665	0.0418305	0.430043	0.611969	1.12143	0.0862377	0.260658	0.490335	1.15865	0.0142822	0.434776	0.753189	1.08471	0.0824895	0.457259	0.453708	1.09482	0.0479083	0.321485	0.559879	1.08444	0.0650901	0.483569
778	MALDI-TOF (Voyager DE-PRO )	65	9	0.17	0.0056			Coagulation factor X	FA10	FA10_MOUSE	54	5.5	45	4.76	0.958826	0.101433	0.319934	0.47246	1.04869	0.916386	0.758707	0.0516471	0.876584	0.00015537	0.114655	0.995595	0.82376	0.58425	0.522649	0.134331	0.956443	0.431922	0.277493	0.187779	1.03143	0.874455	0.844873	0.0531258	0.874437	0.331544	0.457259	0.174875	0.99772	0.859886	0.649438	0.0539034	0.965881	0.228088	0.483569
475	MALDI-TOF (Voyager DE-PRO )	95	11	0.19	5.5e-006			Complement C1r-A subcomponent	C1RA	C1RA_MOUSE	80	5.41	86	5.22	1.01654	0.836498	0.663573	0.0564579	1.05572	0.405797	0.335973	0.158436	0.976909	0.652178	0.511448	0.0808899	1.02738	0.983764	0.880039	0.0523052	1.31557	6.34357e-05	0.0383505	0.992807	1.01875	0.98433	0.951032	0.0500482	1.02221	0.867789	0.867789	0.0534705	1.23324	0.000154311	0.0937881	0.989858	1.22327	0.000263094	0.245786
477	MALDI-TOF (Voyager DE-PRO )	62	7	0.11	0.01			Complement C1r-A subcomponent	C1RA	C1RA_MOUSE	80	5.41	87	5.17	1.01311	0.623018	0.494225	0.0872586	1.0983	0.00950279	0.10228	0.860491	0.934005	0.266876	0.361851	0.246885	1.06872	0.264014	0.430043	0.279999	1.20635	0.00176667	0.260658	0.922182	1.03741	0.413622	0.434776	0.137423	1.06547	0.100767	0.457259	0.412769	1.14489	0.00421959	0.321485	0.878254	1.15804	0.0013629	0.39999
476	MALDI-TOF (Voyager DE-PRO )+MALDI-TOF/TOF (4800 Proteomics analyzer)+LC-MS/MS (FT-ICR)					5	0.37	Complement C1s-A subcomponent	CS1A	CS1A_MOUSE	77	5.05	87	5.12	0.987275	0.729196	0.578453	0.0682984	1.10018	0.00087743	0.0450402	0.978001	0.888672	0.0176708	0.269563	0.791255	0.955697	0.436865	0.430043	0.18571	1.07021	0.375566	0.260658	0.213492	1.03462	0.265894	0.434776	0.215573	0.999708	0.991316	0.991316	0.0500148	1.03782	0.400256	0.321485	0.142733	1.06731	0.162532	0.483569
579	MALDI-TOF (Voyager DE-PRO )	111	19	0.12	1.3e-007			Complement C3	CO3	CO3_MOUSE	186	6.39	67	6	0.984751	0.635142	0.503843	0.0846713	0.992131	0.928144	0.768442	0.051215	0.977676	0.578217	0.453447	0.0973915	1.03706	0.675127	0.603944	0.110076	0.815273	0.00233051	0.260658	0.908083	0.986428	0.730675	0.705957	0.0649519	1.02046	0.591041	0.591041	0.0869023	1.14249	0.0133343	0.321485	0.76206	0.950692	0.456119	0.483569
595	MALDI-TOF/TOF (4800 Proteomics analyzer)+LC-MS/MS (FT-ICR)							Complement C3	CO3	CO3_MOUSE	186	6.39	65	6.24	0.851458	0.0002745	0.00958118	0.990089	0.827551	0.00125003	0.0456075	0.970236	0.874397	0.0476615	0.361851	0.631878	0.85868	0.130505	0.430043	0.414296	0.878774	0.247812	0.260658	0.292103	0.898309	0.10177	0.434776	0.410728	0.886179	0.0655443	0.457259	0.499709	1.04043	0.5589	0.422115	0.0938225	0.923624	0.29139	0.483569
1205	LC-MS/MS (LCQ Deca IonTrap )	94				4	0.02	Complement C3	CO3	CO3_MOUSE	186	6.39	26	5.84	1.03533	0.444687	0.352759	0.142031	0.989966	0.918613	0.760551	0.0515602	1.08411	0.314411	0.361851	0.210784	0.802638	0.0766206	0.430043	0.511299	0.960808	0.912437	0.586206	0.0631445	0.848661	0.0332349	0.434776	0.625364	0.847253	0.0827625	0.457259	0.453038	1.03127	0.748802	0.565541	0.0629223	1.00133	0.929272	0.92257
1677	LC-MS/MS (LCQ Deca IonTrap )					1	ND	Complement C3	CO3	CO3_MOUSE	51	7.92	65	6.41	0.838667	0.00185513	0.0382622	0.953873	0.926485	0.194846	0.333865	0.319425	0.76948	0.00294105	0.142998	0.940553	0.911793	0.375219	0.430043	0.213663	0.895231	0.405149	0.260658	0.199485	0.952278	0.566646	0.547477	0.0920802	0.915105	0.161287	0.457259	0.315408	1.05478	0.484511	0.365932	0.113283	0.943142	0.520778	0.517022
1594	MALDI-TOF/TOF (4800 Proteomics analyzer)+LC-MS/MS (FT-ICR)					2	0.009	Complement C4-B	C4B	CO4B_MOUSE	193	7.38	16	4.37	1.04349	0.426095	0.338011	0.150038	1.02596	0.723497	0.599008	0.0689043	1.06233	0.469084	0.367863	0.13151	0.887111	0.182008	0.430043	0.351215	0.767266	0.0172186	0.260658	0.735746	0.897048	0.0743067	0.434776	0.474771	0.93038	0.188328	0.457259	0.283696	0.841854	0.0166273	0.321485	0.73273	0.800719	0.0121353	0.45605
400	MALDI-TOF (Voyager DE-PRO )	87	13	0.19	0.0025			Complement component 7	CO7	CO7_HUMAN	78	5.51	102	5.59	0.844982	5.88765e-05	0.00364301	0.99748	0.830797	0.00018024	0.0232794	0.994902	0.85926	0.0327346	0.344095	0.699505	0.916486	0.305725	0.430043	0.252099	0.916229	0.376877	0.260658	0.212845	0.985966	0.765605	0.739706	0.0611884	0.929554	0.143217	0.457259	0.339957	0.93167	0.175449	0.321485	0.298133	0.941117	0.321784	0.483569
401	MALDI-TOF (Voyager DE-PRO )	78	10	0.16	0.0034			Complement component 7	CO7	CO7_HUMAN	78	5.51	102	5.65	0.87006	1.38361e-05	0.00153813	0.999368	0.889752	0.00299862	0.0579142	0.939654	0.851579	0.001605	0.130901	0.963358	0.954047	0.626514	0.560457	0.12249	0.955266	0.664495	0.426913	0.11269	1.03204	0.46051	0.444932	0.120762	0.992013	0.86026	0.86026	0.0538823	1.01596	0.79278	0.598756	0.0586732	0.97363	0.535198	0.531338
407	MALDI-TOF (Voyager DE-PRO )+MALDI-TOF/TOF (4800 Proteomics analyzer)+LC-MS/MS (FT-ICR)					25	0.31	Complement component 7	CO7	CO7_HUMAN	78	5.51	103	5.44	0.874478	0.0197272	0.157176	0.772222	0.818842	0.00136714	0.0456075	0.967917	0.932682	0.568779	0.446045	0.099841	0.890123	0.27511	0.430043	0.272146	0.811615	0.0584805	0.260658	0.557698	1.02288	0.582788	0.563073	0.0886028	0.925322	0.30458	0.457259	0.190179	0.830482	0.0207256	0.321485	0.701073	0.937671	0.539164	0.535275
408	MALDI-TOF (Voyager DE-PRO )	76	11	0.2	0.031			Complement component 7	CO7	CO7_HUMAN	78	5.51	102	5.79	0.928726	0.22354	0.319934	0.288707	1.03555	0.590896	0.489223	0.0942311	0.845686	0.050941	0.361851	0.619006	1.20897	0.141977	0.430043	0.398443	0.756688	0.0460292	0.260658	0.596871	0.95696	0.619442	0.598487	0.0814303	1.12245	0.162958	0.457259	0.313287	1.2494	0.0298838	0.321485	0.643312	1.01419	0.955318	0.948428
412	MALDI-TOF (Voyager DE-PRO )	88	11	0.17	0.0018			Complement component 7	CO7	CO7_HUMAN	78	5.51	101	5.87	0.948791	0.50402	0.399827	0.119802	1.03853	0.512924	0.424668	0.116178	0.877742	0.144327	0.361851	0.390204	1.26663	0.0631717	0.430043	0.544673	0.743288	0.0294007	0.260658	0.664744	0.916245	0.386569	0.434776	0.14846	1.13248	0.154352	0.457259	0.324471	1.24293	0.0262064	0.321485	0.66477	0.972534	0.906452	0.899915
164	LC-MS/MS (Q-Exactive)					78	0.55	Complement factor H	CFH	CFAH_MOUSE	139	6.67	138	5.95	0.93237	0.0195709	0.157176	0.773287	0.921469	0.0446153	0.221631	0.644395	0.942969	0.191559	0.361851	0.323422	0.96973	0.728121	0.65135	0.0978129	0.949335	0.636106	0.408674	0.119944	1.02912	0.423106	0.434776	0.133814	1.01124	0.690199	0.690199	0.0701109	0.966195	0.475906	0.359433	0.11589	0.957447	0.364131	0.483569
1057	MALDI-TOF (Voyager DE-PRO )+MALDI-TOF/TOF (4800 Proteomics analyzer)+LC-MS/MS (FT-ICR)					30	0.45	Complement factor I	CFAI	CFAI_MOUSE	67	5.24	31	6.4	1.03486	0.162833	0.319934	0.362851	1.07261	0.0315427	0.176484	0.705703	0.999287	0.952137	0.74668	0.050538	1.10046	0.0216754	0.430043	0.706563	1.16028	0.00196932	0.260658	0.916884	1.05366	0.123149	0.434776	0.371265	1.09669	0.00554695	0.293974	0.855866	1.1246	0.00143833	0.255285	0.940727	1.11089	0.00475786	0.39999
673	MALDI-TOF/TOF (4800 Proteomics analyzer)+LC-MS/MS (FT-ICR)					3	0.3	Fetuin B	FETUB	FETUB_MOUSE	43	5.05	54	5.35	1.05121	0.0338164	0.210503	0.69102	1.11049	0.00143754	0.0456075	0.966547	0.99472	0.771717	0.605192	0.0626662	1.1009	0.00831898	0.430043	0.814547	1.11493	0.0195729	0.260658	0.719754	1.05098	0.130778	0.434776	0.358795	1.10031	0.00185583	0.219816	0.929156	1.07421	0.0376673	0.321485	0.603577	1.09657	0.00783829	0.451342
676	MALDI-TOF (Voyager DE-PRO )	88	11	0.24	2.3e-005			Fetuin B	FETUB	FETUB_MOUSE	43	6.17	53	5.46	1.05039	0.05726	0.256123	0.594412	1.12066	0.000646736	0.0385527	0.983172	0.985551	0.552107	0.43297	0.104378	1.12708	0.00236267	0.331351	0.907334	1.12754	0.0394337	0.260658	0.621121	1.07175	0.0506138	0.434776	0.549579	1.1179	0.000506293	0.118979	0.972846	1.09284	0.0268464	0.321485	0.660888	1.09569	0.0297035	0.483569
667	MALDI-TOF (Voyager DE-PRO )	57	10	0.26	0.03			Group-specific component (Vitamin D-binding protein)	VTDB	VTDB_MOUSE	54	5.39	50	5.24	1.01885	0.458721	0.363892	0.136336	1.06295	0.105598	0.328957	0.463001	0.975021	0.478162	0.374982	0.128133	1.06071	0.311828	0.430043	0.248359	1.09121	0.013372	0.260658	0.765422	1.04055	0.232648	0.434776	0.241431	1.05001	0.15361	0.457259	0.325466	1.02853	0.351656	0.321485	0.164535	1.08223	0.00377104	0.39999
678	MALDI-TOF (Voyager DE-PRO )	136	19	0.41	4.1e-010			Group-specific component (Vitamin D-binding protein)	VTDB	VTDB_MOUSE	46	5.39	50	5.32	1.09014	0.0907904	0.304433	0.497245	1.20292	0.00543381	0.0809791	0.905757	0.991367	0.830564	0.651341	0.056865	1.24831	0.0194608	0.430043	0.720484	0.787077	0.0173947	0.260658	0.734499	1.01168	0.926297	0.894962	0.0510699	1.18257	0.013648	0.293974	0.759081	1.25792	0.00432663	0.321485	0.876327	1.09695	0.23369	0.483569
931	MALDI-TOF (Voyager DE-PRO )+MALDI-TOF/TOF (4800 Proteomics analyzer)+LC-MS/MS (FT-ICR)					16	0.3	Haptoglobin	HPT	HPT_MOUSE	39	5.07	36	4.86	1.83085	0.0726012	0.287963	0.545675	6.23716	0.00840394	0.0961982	0.871722	0.909781	0.855751	0.671093	0.0549487	2.45926	0.045713	0.430043	0.59797	0.121261	0.264905	0.260658	0.279355	2.03505	0.115465	0.434776	0.384625	0.93132	0.0139988	0.293974	0.755802	2.43149	0.256652	0.321485	0.222343	0.197081	0.660087	0.655327
942	MALDI-TOF (Voyager DE-PRO )	93	13	0.32	8.9e-006			Haptoglobin	HPT	HPT_MOUSE	39	5.88	35	5	1.51367	0.0338031	0.210503	0.691086	7.09573	0.00200723	0.05156	0.956045	0.680035	0.91858	0.720364	0.0515614	2.21082	0.0396501	0.430043	0.620277	0.127712	0.230828	0.260658	0.305697	1.91018	0.12489	0.434776	0.368352	1.00257	0.0114393	0.293974	0.781037	2.09593	0.21652	0.321485	0.255638	0.201277	0.688643	0.683677
499	MALDI-TOF (Voyager DE-PRO )	146	17	0.38	4.1e-011			Hemopexin	HEMO	HEMO_MOUSE	51	7.92	70	5.32	1.10799	0.00711539	0.0959559	0.880051	1.04584	0.356267	0.333865	0.184458	1.17626	0.00327906	0.149146	0.935352	1.04947	0.519823	0.465014	0.154606	1.2058	0.00688003	0.260658	0.831884	0.996543	0.980755	0.947577	0.0500727	1.03483	0.326158	0.457259	0.177794	1.16084	0.00410393	0.321485	0.880363	1.13976	0.0117926	0.45605
509	MALDI-TOF (Voyager DE-PRO )	204	21	0.41	6.4e-017			Hemopexin	HEMO	HEMO_MOUSE	51	7.92	69	5.43	1.11152	0.00393094	0.0654847	0.920202	1.07121	0.194814	0.333865	0.319464	1.15508	0.00445803	0.165156	0.918496	1.06933	0.395037	0.430043	0.204139	1.1731	0.0157815	0.260658	0.746256	1.04761	0.381317	0.434776	0.150739	1.05566	0.177233	0.457259	0.296065	1.13325	0.0111681	0.321485	0.783905	1.12076	0.0156806	0.467026
511	MALDI-TOF (Voyager DE-PRO )	79	11	0.29	0.0002			Hemopexin	HEMO	HEMO_MOUSE	51	7.92	72	5.13	1.09524	0.0126131	0.134472	0.826378	1.00645	0.728692	0.603309	0.0681639	1.19383	0.000956707	0.117041	0.976294	0.930999	0.405373	0.430043	0.199383	1.20859	0.00886695	0.260658	0.808432	0.951317	0.38005	0.434776	0.151296	1.00636	0.659516	0.659516	0.0746387	1.15513	0.00664674	0.321485	0.839361	1.15012	0.0104096	0.45605
512	MALDI-TOF (Voyager DE-PRO )	177	19	0.4	3.2e-014			Hemopexin	HEMO	HEMO_MOUSE	51	7.92	71	5.22	1.123	0.00458319	0.0727146	0.911128	1.04228	0.376642	0.333865	0.17315	1.21343	0.00120824	0.126968	0.971076	1.05253	0.519726	0.464928	0.154639	1.2166	0.011773	0.260658	0.779436	0.997654	0.979829	0.946683	0.0500798	1.03765	0.313881	0.457259	0.184699	1.16503	0.00749266	0.321485	0.827648	1.15129	0.0148182	0.45605
519	MALDI-TOF (Voyager DE-PRO )	205	21	0.42	5.1e-017			Hemopexin	HEMO	HEMO_MOUSE	51	7.92	68	5.54	1.09248	0.00791805	0.100499	0.871244	1.07778	0.146278	0.333865	0.38704	1.10796	0.019399	0.273834	0.778895	1.07983	0.336043	0.430043	0.234262	1.13835	0.0312809	0.260658	0.655804	1.0655	0.218412	0.434776	0.253909	1.0529	0.184097	0.457259	0.288315	1.10942	0.0198126	0.321485	0.70774	1.09431	0.027443	0.483569
541	MALDI-TOF (Voyager DE-PRO )	207	21	0.47	3.2e-017			Hemopexin	HEMO	HEMO_MOUSE	51	7.92	67	5.66	1.0671	0.0362971	0.210503	0.679014	1.06342	0.21741	0.333865	0.293819	1.07094	0.0821284	0.361851	0.519529	1.08486	0.244188	0.430043	0.294922	1.0984	0.115171	0.260658	0.437605	1.08189	0.101377	0.434776	0.411526	1.04368	0.246237	0.457259	0.230346	1.08101	0.0637537	0.321485	0.505155	1.06453	0.0818179	0.483569
578	MALDI-TOF (Voyager DE-PRO )	136	12	0.26	4.1e-010			Hemopexin	HEMO	HEMO_MOUSE	51	7.92	64	6.17	0.923615	0.00159234	0.0356597	0.95891	0.965627	0.147572	0.333865	0.384963	0.885263	0.00489901	0.169043	0.912621	0.94689	0.112972	0.430043	0.441174	0.935076	0.271976	0.260658	0.27433	1.03042	0.220716	0.434776	0.251825	0.977334	0.408734	0.457259	0.139333	1.04098	0.278546	0.321485	0.20677	0.978566	0.626425	0.621907
1681	MALDI-TOF (Voyager DE-PRO )	135	16	0.36	5.1e-010			Hemopexin	HEMO	HEMO_MOUSE	51	7.92	64	6.29	0.865477	0.000206184	0.00801449	0.992252	0.948545	0.123566	0.328957	0.426639	0.798168	0.000485245	0.117041	0.987005	0.927533	0.042412	0.430043	0.60981	0.89924	0.18576	0.260658	0.347313	1.03624	0.210173	0.434776	0.261575	0.961144	0.226638	0.457259	0.246585	1.02851	0.557052	0.42072	0.0942455	0.935104	0.229971	0.483569
1692	MALDI-TOF (Voyager DE-PRO )	64	1	ND				Hemopexin	HEMO	HEMO_MOUSE	51	7.92	79	5.06	1.04158	0.417326	0.331054	0.154008	1.17743	0.0482021	0.228494	0.629715	0.937406	0.550662	0.431838	0.104784	1.21449	0.163304	0.430043	0.371905	0.814054	0.184887	0.260658	0.348214	0.992123	0.900926	0.870449	0.0519389	1.14789	0.11394	0.457259	0.387379	1.21849	0.0659675	0.321485	0.49844	1.08468	0.451783	0.483569
319	MALDI-TOF/TOF (4800 Proteomics analyzer)					10	0.26	Ig mu chain C region secreted form	IGH-6	IGHM_MOUSE	50	6.56	116	4.64	0.910531	0.000121213	0.00557701	0.995145	0.908824	0.00708818	0.0880282	0.886053	0.912225	0.00708305	0.183628	0.886111	0.944879	0.406612	0.430043	0.198823	0.902888	0.0646703	0.260658	0.540678	0.964304	0.280351	0.434776	0.205556	0.952629	0.216499	0.457259	0.255658	0.911857	0.0202054	0.321485	0.704847	0.940103	0.145799	0.483569
358	MALDI-TOF/TOF (4800 Proteomics analyzer)+LC-MS/MS (FT-ICR)					19	0.39	Ig mu chain C region secreted form	IGH-6	IGHM_MOUSE	50	6.56	109	5.29	0.911053	0.0645735	0.256123	0.570104	1.01573	0.782418	0.647791	0.0614682	0.813709	0.00523902	0.172558	0.908226	0.90317	0.332058	0.430043	0.236505	0.916688	0.541408	0.347834	0.147483	0.944005	0.35588	0.434776	0.16247	1.03495	0.588741	0.588741	0.087371	1.00791	0.716837	0.541399	0.066616	0.939798	0.467723	0.483569
345	MALDI-TOF (Voyager DE-PRO )	68	8	0.11	0.06			Inter alpha-trypsin inhibitor, heavy chain 4, isoform CRA_b	ITIH4	A6X935_MOUSE	105	65.99	113	5.25	1.05812	0.0612584	0.256123	0.580859	1.06532	0.140162	0.333865	0.3971	1.05078	0.252679	0.361851	0.259239	1.12679	0.0441614	0.430043	0.60345	0.972714	0.851659	0.547159	0.0734031	0.975158	0.680196	0.657186	0.0715263	1.07802	0.0570405	0.457259	0.526793	0.972769	0.570113	0.430584	0.0913159	0.986113	0.745622	0.740244
569	MALDI-TOF (Voyager DE-PRO )+MALDI-TOF/TOF (4800 Proteomics analyzer)+LC-MS/MS (FT-ICR)					12	0.14	Kininogen-1	KNG1	KNG1_MOUSE	73	5.41	68	4.78	1.21257	5.23003e-05	0.00352652	0.997742	1.24002	0.000794515	0.044073	0.979823	1.18435	0.0180914	0.269563	0.78819	1.14072	0.139009	0.430043	0.402428	1.16677	0.130705	0.260658	0.414009	1.09317	0.158113	0.434776	0.319504	1.11528	0.0547124	0.457259	0.534793	1.12795	0.0689443	0.321485	0.489709	1.11698	0.0958673	0.483569
627	MALDI-TOF (Voyager DE-PRO )	74	12	0.1	0.00059			Murinoglobulin-1	MUG1	MUG1_MOUSE	165	6	59	6.05	1.03709	0.106361	0.319934	0.46172	1.04267	0.153193	0.333865	0.376144	1.0314	0.36721	0.361851	0.178273	1.12217	0.00276422	0.331351	0.898399	1.04159	0.593225	0.381124	0.131728	1.0895	0.00363415	0.434776	0.889247	1.09117	0.0030074	0.282696	0.902005	1.02431	0.479792	0.362368	0.114703	1.03794	0.318052	0.483569
1653	MALDI-TOF (Voyager DE-PRO )	76	5	0.38	0.0062			Novel protein similar to odorant binding protein Ia Obp1a	Gm5938	A2AEN9_MOUSE	18	6.43	14	6.54	1.23832	0.0250691	0.178981	0.738332	1.43044	0.00160976	0.0456075	0.963269	1.08918	0.793105	0.621965	0.0603366	1.11912	0.742126	0.663879	0.0947695	0.736158	0.177686	0.260658	0.355808	0.99111	0.96188	0.929341	0.0502854	1.08176	0.517853	0.517853	0.103914	1.0638	0.855607	0.646207	0.0541489	0.810738	0.131526	0.483569
1632	MALDI-TOF (Voyager DE-PRO )	97	10	0.7	7.9e-005			Odorant binding protein Ia	OBP1a	P97336_MOUSE	17	5.21	15	5.3	1.24905	0.0413263	0.229482	0.656205	1.50408	0.00154064	0.0456075	0.964573	1.06393	0.83756	0.656827	0.0562997	1.13535	0.744886	0.666348	0.094179	0.82068	0.331243	0.260658	0.236967	1.01489	0.630701	0.609365	0.0794165	1.10657	0.445463	0.457259	0.125797	0.994727	0.791383	0.597701	0.058794	0.857033	0.159871	0.483569
1129	MALDI-TOF/TOF (4800 Proteomics analyzer)					6	0.1	Pantothenate kinase 4	PANK4	PANK4_MOUSE	92	7.92	29	5.76	1.29169	0.000617851	0.019327	0.980507	1.54674	1.5793e-06	0.00123041	0.999977	1.02551	0.750002	0.588163	0.0653018	1.60521	3.64661e-07	0.000238873	0.999958	1.21262	0.00742397	0.260658	0.825092	1.46703	9.65213e-07	0.00087754	0.999953	1.37855	4.43994e-05	0.0208677	0.996763	1.10803	0.139206	0.321485	0.345841	1.21054	0.00163848	0.39999
1413	LC-MS/MS (Q-Exactive)					7	0.35	Peroxiredoxin-2	PRDX2	PRDX2_MOUSE	22	5.2	21	5.1	0.996968	0.933878	0.740822	0.0510403	0.958317	0.465542	0.385438	0.132858	1.03887	0.537009	0.42113	0.108729	0.775142	0.0571658	0.430043	0.5615	0.893295	0.412239	0.264848	0.1963	0.783818	0.016424	0.434776	0.734428	0.864875	0.187171	0.457259	0.284948	0.903561	0.213226	0.321485	0.258694	0.933516	0.2973	0.483569
355	MALDI-TOF (Voyager DE-PRO )	112	14	0.15	1e-07			Phosphatidylinositol-glycan-specific phospholipase D	PHLD	PHLD_MOUSE	93	6.65	110	5.23	0.937303	0.0762896	0.302593	0.535137	1.02638	0.627625	0.519633	0.0858682	0.848392	0.00191181	0.140931	0.957739	1.09324	0.237958	0.430043	0.29987	0.908233	0.249757	0.260658	0.290607	1.0561	0.210148	0.434776	0.261599	1.08298	0.105242	0.457259	0.403806	0.948629	0.31847	0.321485	0.182076	0.913245	0.0964673	0.483569
520	MALDI-TOF/TOF (4800 Proteomics analyzer)+LC-MS/MS (FT-ICR)					7	0.18	Phosphatidylinositol-glycan-specific phospholipase D	PHLD	PHLD_MOUSE	93	5.54	72	6.24	1.00189	0.935728	0.74229	0.0509827	0.960362	0.356486	0.333865	0.184332	1.04252	0.352766	0.361851	0.186494	0.90999	0.323835	0.430043	0.241226	1.2154	0.00643295	0.260658	0.837712	1.07603	0.206891	0.434776	0.264726	1.00352	0.938438	0.938438	0.0507456	1.0011	0.883052	0.666934	0.0527086	1.15396	0.00829217	0.45278
309	LC-MS/MS (Q-Exactive)					51	0.62	Plasminogen	PLG	PLMN_MOUSE	91	6.21	116	6.04	1.00723	0.812193	0.644293	0.0585707	0.927232	0.14449	0.333865	0.389939	1.09706	0.0787291	0.361851	0.528789	0.783231	0.0418982	0.430043	0.611717	1.09354	0.511894	0.328873	0.157313	0.842495	0.0516443	0.434776	0.545773	0.823692	0.0187469	0.337444	0.715785	1.05482	0.526475	0.397626	0.101669	1.0848	0.245266	0.483569
415	MALDI-TOF (Voyager DE-PRO )	158	23	0.31	2.6e-012			Plasminogen	PLMN	PLMN_MOUSE	91	6.21	101	6.73	1.07695	0.401423	0.319934	0.161547	1.26904	0.0819599	0.275858	0.51998	0.919907	0.625859	0.490808	0.0862446	1.64899	0.0261054	0.430043	0.681479	0.59797	0.0420513	0.260658	0.611147	1.06833	0.595072	0.574941	0.0860904	1.47246	0.0102311	0.293974	0.794146	1.49749	0.0188161	0.321485	0.715253	0.989893	0.707947	0.702841
54	MALDI-TOF (Voyager DE-PRO )	63	5	0.15	0.0081			Serine protease inhibitor A3K	SPA3K	SPA3K_MOUSE	47	5.05	>140	4.55	0.883395	0.0307965	0.209338	0.706406	0.862257	0.0986351	0.326653	0.478567	0.905371	0.173278	0.361851	0.347051	0.738401	0.0377593	0.430043	0.627769	0.832926	0.153435	0.260658	0.383753	0.856603	0.0835013	0.434776	0.451235	0.747822	0.012406	0.293974	0.771135	0.865804	0.0761997	0.321485	0.469722	0.980599	0.840696	0.834633
87	MALDI-TOF (Voyager DE-PRO )	80	7	0.2	0.00017			Serine protease inhibitor A3K	SPA3K	SPA3K_MOUSE	47	5.05	137	4.51	0.896735	0.000177228	0.00731071	0.993209	0.878441	0.000938301	0.0450574	0.976687	0.915781	0.0438688	0.361851	0.64755	0.924814	0.331692	0.430043	0.236712	0.91731	0.165538	0.260658	0.369319	0.980363	0.625228	0.604077	0.0803848	0.933362	0.142283	0.457259	0.341312	0.923862	0.0572337	0.321485	0.526141	0.950377	0.288458	0.483569
256	MALDI-TOF (Voyager DE-PRO )	125	15	0.36	5.1e-009			Serine protease inhibitor A3K	SPA3K	SPA3K_MOUSE	47	5.05	122	4.55	0.852341	2.90519e-05	0.0023968	0.998702	0.839009	0.00146369	0.0456075	0.966043	0.8655	0.00697541	0.183628	0.887332	0.855718	0.0566105	0.430043	0.563127	0.848355	0.0329346	0.260658	0.648263	0.941353	0.24976	0.434776	0.227593	0.861896	0.0159622	0.319244	0.738334	0.862171	0.00920728	0.321485	0.805988	0.904436	0.119833	0.483569
257	MALDI-TOF (Voyager DE-PRO )	181	14	0.46	1.3e-014			Serine protease inhibitor A3K	SPA3K	SPA3K_MOUSE	47	5.05	122	4.6	0.823089	1.44699e-05	0.00153813	0.999339	0.792481	0.000639181	0.0385527	0.983347	0.853666	0.00709563	0.183628	0.885969	0.817015	0.0223923	0.430043	0.702271	0.828681	0.046656	0.260658	0.59471	0.898641	0.079676	0.434776	0.460732	0.825157	0.00647914	0.293974	0.841777	0.84373	0.0133098	0.321485	0.762295	0.89164	0.152799	0.483569
262	MALDI-TOF (Voyager DE-PRO )	87	11	0.24	3.4e-005			Serine protease inhibitor A3K	SPA3K	SPA3K_MOUSE	47	5.05	123	4.65	0.815231	0.000159675	0.00696666	0.993803	0.771497	0.00162017	0.0456075	0.963074	0.8584	0.0295799	0.324758	0.716234	0.790708	0.0450105	0.430043	0.600433	0.850071	0.234742	0.260658	0.302476	0.859153	0.0423482	0.434776	0.582586	0.820408	0.0242312	0.387699	0.677188	0.871785	0.0960173	0.321485	0.422703	0.897883	0.244141	0.483569
531	MALDI-TOF/TOF (4800 Proteomics analyzer)+LC-MS/MS (FT-ICR)					15	0.38	Serine protease inhibitor A3K	SPA3K	SPA3K_MOUSE	47	5.05	72	6.41	1.0018	0.896411	0.711101	0.0525641	0.932423	0.141731	0.333865	0.39448	1.07176	0.148965	0.361851	0.382748	0.936996	0.393699	0.430043	0.204764	1.20517	0.0056102	0.260658	0.849101	1.05455	0.204715	0.434776	0.266848	1.00798	0.855891	0.855891	0.0541323	1.01484	0.950476	0.717857	0.0504821	1.15523	0.00516533	0.39999
588	MALDI-TOF (Voyager DE-PRO )	80	9	0.3	0.00015			Serine protease inhibitor A3K	SPA3K	SPA3K_MOUSE	47	5.05	63	4.55	0.850499	1.96231e-05	0.00182128	0.99911	0.822979	0.000537726	0.0385527	0.985737	0.878934	0.0116814	0.238179	0.839851	0.862336	0.106103	0.430043	0.452738	0.847486	0.0378547	0.260658	0.627384	0.950481	0.32624	0.434776	0.177749	0.871187	0.0332747	0.457259	0.625159	0.858362	0.0103836	0.321485	0.792442	0.906772	0.149818	0.483569
599	MALDI-TOF (Voyager DE-PRO )	101	13	0.33	1.3e-006			Serine protease inhibitor A3K	SPA3K	SPA3K_MOUSE	47	5.05	62	4.59	0.797003	3.13581e-06	0.000584577	0.999859	0.771494	0.000408374	0.0385527	0.988904	0.82293	0.00262656	0.142998	0.945571	0.810706	0.0420826	0.430043	0.611031	0.800839	0.0439365	0.260658	0.604257	0.928787	0.238426	0.434776	0.236624	0.821064	0.0113882	0.293974	0.781573	0.818611	0.012547	0.321485	0.76973	0.872192	0.143061	0.483569
621	MALDI-TOF (Voyager DE-PRO )	98	9	0.33	2.4e-006			Serine protease inhibitor A3K	SPA3K	SPA3K_MOUSE	47	5.05	60	4.69	0.76986	4.91327e-07	0.000366762	0.999981	0.740376	0.000154419	0.0232794	0.995622	0.799006	0.000909561	0.117041	0.977305	0.811256	0.0357246	0.430043	0.636157	0.78888	0.0321483	0.260658	0.651812	0.901297	0.148876	0.434776	0.331936	0.814785	0.00970074	0.293974	0.800189	0.809026	0.00903428	0.321485	0.808063	0.862553	0.115062	0.483569
1671	MALDI-TOF (Voyager DE-PRO )	114	13	0.44	6.4e-008			Serine protease inhibitor A3K	SPA3K	SPA3K_MOUSE	47	5.1	61	4.64	0.759574	1.77092e-06	0.000584577	0.999923	0.733669	0.000426529	0.0385527	0.988451	0.785682	0.00144283	0.130901	0.966445	0.786462	0.0399978	0.430043	0.618929	0.774943	0.0547236	0.260658	0.568754	0.909719	0.188611	0.434776	0.283391	0.793654	0.0107707	0.293974	0.788183	0.793302	0.0157108	0.321485	0.740492	0.855504	0.177344	0.483569
1672	MALDI-TOF (Voyager DE-PRO )	56	6	0.19	0.045			Serine protease inhibitor A3K	SPA3K	SPA3K_MOUSE	47	5.1	59	4.64	0.826382	1.12798e-05	0.00153813	0.999483	0.80648	0.000622914	0.0385527	0.983725	0.84668	0.00569304	0.178583	0.902525	0.850573	0.0852718	0.430043	0.492348	0.823387	0.0527211	0.260658	0.574898	0.971477	0.593258	0.573189	0.0864543	0.871287	0.0321294	0.449812	0.631132	0.846244	0.0178213	0.321485	0.723022	0.881052	0.0997898	0.483569
86	MALDI-TOF (Voyager DE-PRO )	80	9	0.23	0.00018			Serine protease inhibitor A3K	SPA3K	SPA3K_MOUSE	47	5.05	137	4.55	0.871405	4.11647e-05	0.00306957	0.998195	0.846197	0.000598619	0.0385527	0.984294	0.8975	0.0211026	0.297881	0.767285	0.902767	0.289909	0.430043	0.262175	0.874874	0.0607453	0.260658	0.551308	0.945661	0.297589	0.434776	0.194447	0.907963	0.12126	0.457259	0.374471	0.893188	0.0201956	0.321485	0.704918	0.915379	0.115799	0.483569
803	MALDI-TOF (Voyager DE-PRO )	80	8	0.26	0.00018			Serum paraoxonase/arylesterase 1	PON1	PON1_MOUSE	40	5.07	42	4.84	0.899465	0.00223191	0.0447634	0.94704	0.931806	0.139265	0.333865	0.398611	0.8691	0.00387886	0.158177	0.926549	1.03846	0.828652	0.741282	0.0775627	0.933373	0.401034	0.260658	0.201362	0.982257	0.813199	0.785689	0.0570098	1.01928	0.708293	0.708293	0.0676945	0.957332	0.304805	0.321485	0.190044	0.942186	0.200017	0.483569
787	MALDI-TOF (Voyager DE-PRO )	149	16	0.49	2e-11			Zinc-alpha-2-glycoprotein	ZA2G	ZA2G_MOUSE	35	5.83	43	5	1.03926	0.0808986	0.304433	0.522514	1.05051	0.141183	0.333865	0.395392	1.02779	0.32071	0.361851	0.206529	1.10323	0.0309674	0.430043	0.657267	1.07638	0.0691212	0.260658	0.529247	1.07011	0.0429219	0.434776	0.580139	1.0832	0.0137257	0.293974	0.758351	1.00879	0.752606	0.568414	0.0625175	1.06092	0.0318346	0.483569
790	MALDI-TOF (Voyager DE-PRO )	195	20	0.54	5.1e-016			Zinc-alpha-2-glycoprotein	ZA2G	ZA2G_MOUSE	35	5.83	42	5.1	1.02316	0.154051	0.319934	0.375875	1.03758	0.0977673	0.323779	0.480572	1.00828	0.675113	0.529434	0.0766497	1.05856	0.100213	0.430043	0.463196	1.06155	0.038129	0.260658	0.626282	1.04234	0.0668325	0.434776	0.495869	1.04491	0.0603663	0.457259	0.515821	1.00209	0.912396	0.689097	0.0515138	1.04657	0.0236517	0.483569
399	MALDI-TOF (Voyager DE-PRO )+MALDI-TOF/TOF (4800 Proteomics analyzer)	-	-	-	-	-	-	Unidentified 6					100	4.79	1.00002	0.937586	0.743763	0.0509266	1.00299	0.816943	0.676375	0.0580398	0.997006	0.900814	0.706432	0.0523222	1.03563	0.781319	0.69894	0.086651	1.14655	0.00676598	0.260658	0.833348	1.00337	0.85872	0.829671	0.0539695	1.02822	0.495838	0.495838	0.109973	0.955902	0.28816	0.321485	0.200416	1.08023	0.0507322	0.483569
403	MALDI-TOF (Voyager DE-PRO )	-	-	-	-	-	-	Unidentified 6					102	5.53	0.85689	0.00573337	0.0829334	0.896302	0.830243	0.00118551	0.0456075	0.971536	0.883939	0.264652	0.361851	0.248767	0.874923	0.121572	0.430043	0.427552	0.87249	0.152848	0.260658	0.384481	0.997876	0.871732	0.842242	0.0532644	0.902235	0.0917051	0.457259	0.432126	0.876206	0.0529817	0.321485	0.540923	0.939842	0.449321	0.483569
404	MALDI-TOF (Voyager DE-PRO )+MALDI-TOF/TOF (4800 Proteomics analyzer)	-	-	-	-	-	-	Unidentified 6					102	5.72	0.889182	0.00235119	0.0447634	0.944959	0.948435	0.254887	0.333865	0.257264	0.838303	0.00281937	0.142998	0.942473	1.08647	0.414698	0.430043	0.19521	0.835675	0.048978	0.260658	0.586897	0.99993	0.994067	0.960439	0.0500069	1.06344	0.25064	0.457259	0.226913	1.14141	0.0447836	0.321485	0.572368	0.988957	0.842882	0.836803
709	MALDI-TOF/TOF (4800 Proteomics analyzer)	-	-	-	-	-	-	Unidentified 6					48	6.18	1.09963	0.0201186	0.159596	0.769575	1.06312	0.452062	0.374278	0.138148	1.13946	0.00227781	0.142998	0.951364	0.914494	0.710848	0.635899	0.101676	0.918493	0.214999	0.260658	0.319312	0.981122	0.676417	0.653535	0.0720761	0.925758	0.406091	0.457259	0.140382	0.930095	0.0858717	0.321485	0.445544	0.946072	0.234888	0.483569
832	MALDI-TOF (Voyager DE-PRO )+MALDI-TOF/TOF (4800 Proteomics analyzer)	-	-	-	-	-	-	Unidentified 6					42	4.73	0.834132	0.00246538	0.0469374	0.943001	0.883658	0.118834	0.328957	0.435733	0.787525	0.0058664	0.17942	0.900396	0.949647	0.761229	0.680967	0.0907415	0.907939	0.616125	0.395837	0.125305	1.04027	0.535949	0.517818	0.0992808	1.00097	0.96411	0.96411	0.050253	0.953592	0.479553	0.362188	0.114775	0.908282	0.341024	0.483569
836	MALDI-TOF/TOF (4800 Proteomics analyzer)	-	-	-	-	-	-	Unidentified 6					41	5.34	0.962657	0.434526	0.344698	0.14634	0.940212	0.492877	0.408069	0.12289	0.987718	0.71033	0.557051	0.0708581	0.744901	0.0283028	0.430043	0.670161	0.955553	0.802813	0.515777	0.0824318	0.942374	0.449999	0.434776	0.12425	0.773602	0.00904458	0.293974	0.807939	0.963587	0.540515	0.40823	0.0981585	0.969307	0.59358	0.589299
905	MALDI-TOF/TOF (4800 Proteomics analyzer)	-	-	-	-	-	-	Unidentified 6					38	6.15	1.05881	0.420092	0.333249	0.152742	1.15671	0.0562733	0.232953	0.599271	0.974603	0.581138	0.455737	0.0966505	1.03038	0.953838	0.853268	0.056707	0.71035	0.0153189	0.260658	0.749776	1.02668	0.775733	0.749492	0.0602099	1.01868	0.805404	0.805404	0.0576223	1.27126	0.023493	0.321485	0.682011	0.942587	0.716286	0.71112
940	MALDI-TOF/TOF (4800 Proteomics analyzer)	-	-	-	-	-	-	Unidentified 6					36	5.53	1.0646	0.0403593	0.224112	0.660444	1.03021	0.602683	0.498982	0.091422	1.10286	0.0126729	0.248242	0.831066	0.939259	0.468605	0.430043	0.173041	0.870426	0.00544774	0.260658	0.851463	1.06181	0.218812	0.434776	0.253545	1.02577	0.625905	0.625905	0.0802639	0.913029	0.0172803	0.321485	0.727366	0.890173	0.00225837	0.39999
959	MALDI-TOF (Voyager DE-PRO )+MALDI-TOF/TOF (4800 Proteomics analyzer)	-	-	-	-	-	-	Unidentified 6					35	4.37	0.841615	0.000246458	0.00918893	0.990962	0.841453	0.0213583	0.14771	0.765587	0.841775	0.00448086	0.165156	0.918187	0.818316	0.0108496	0.430043	0.7881	0.891294	0.355966	0.260658	0.223473	0.89481	0.0585288	0.434776	0.521819	0.830228	0.00295001	0.282696	0.903233	0.903373	0.16122	0.321485	0.315494	0.930636	0.317597	0.483569
1012	MALDI-TOF/TOF (4800 Proteomics analyzer)	-	-	-	-	-	-	Unidentified 6					33	4.79	1.14775	0.00153821	0.0356597	0.959979	1.16439	0.0137192	0.120594	0.822151	1.13071	0.0453803	0.361851	0.641198	1.21509	0.0176958	0.430043	0.732388	1.22483	0.0158698	0.260658	0.745591	1.13491	0.0608741	0.434776	0.51419	1.18272	0.00534878	0.293974	0.859019	1.15725	0.0192298	0.321485	0.712102	1.17227	0.0094289	0.45605
1027	MALDI-TOF/TOF (4800 Proteomics analyzer)	-	-	-	-	-	-	Unidentified 6					33	4.49	0.942722	0.148816	0.319934	0.383986	0.904559	0.104711	0.328957	0.464934	0.983232	0.793065	0.621934	0.0603407	0.751329	0.00490579	0.430043	0.859655	0.872997	0.128088	0.260658	0.417799	0.911841	0.248904	0.434776	0.228258	0.766535	0.00119112	0.185815	0.948215	0.90504	0.0861457	0.321485	0.444895	0.901352	0.0731018	0.483569
1041	MALDI-TOF/TOF (4800 Proteomics analyzer)	-	-	-	-	-	-	Unidentified 6					32	4.49	0.910898	0.0198136	0.157176	0.771635	0.889917	0.0607596	0.251525	0.583686	0.933336	0.176892	0.361851	0.34218	0.728369	0.0177432	0.430043	0.732059	0.846074	0.0594757	0.260658	0.554866	0.901005	0.196864	0.434776	0.274721	0.743562	0.0043227	0.293974	0.876397	0.87997	0.0368064	0.321485	0.607652	0.884152	0.0438858	0.483569
1044	MALDI-TOF/TOF (4800 Proteomics analyzer)	-	-	-	-	-	-	Unidentified 6					32	4.57	0.854525	0.00160545	0.0356597	0.958652	0.820422	0.0074475	0.0924906	0.882034	0.890088	0.0897951	0.361851	0.499731	0.765996	0.0198003	0.430043	0.718281	0.783962	0.0182778	0.260658	0.728376	0.872258	0.148797	0.434776	0.332045	0.774312	0.00488086	0.293974	0.866712	0.82743	0.00886301	0.321485	0.81014	0.83806	0.0271939	0.483569
1056	MALDI-TOF/TOF (4800 Proteomics analyzer)	-	-	-	-	-	-	Unidentified 6					31	6.15	1.06917	0.00560157	0.0829334	0.897935	1.0986	0.00441254	0.0716284	0.919115	1.0411	0.284842	0.361851	0.232352	1.08935	0.04681	0.430043	0.594183	1.17025	0.00064112	0.193591	0.95941	1.0499	0.150849	0.434776	0.329213	1.08369	0.013399	0.293974	0.761442	1.14234	0.000264212	0.0937881	0.98396	1.10692	0.00624169	0.41419
1241	MALDI-TOF/TOF (4800 Proteomics analyzer)	-	-	-	-	-	-	Unidentified 6					26	5.08	1.01531	0.928667	0.736689	0.0512113	1.0797	0.422071	0.349447	0.1509	0.952909	0.310999	0.361851	0.213137	1.2177	0.0548382	0.430043	0.568408	1.05079	0.855985	0.549938	0.0726387	1.17946	0.0290555	0.434776	0.647973	1.13739	0.0495184	0.457259	0.553695	1.03738	0.594656	0.44912	0.0861736	1.03835	0.675308	0.670437
1330	MALDI-TOF/TOF (4800 Proteomics analyzer)	-	-	-	-	-	-	Unidentified 6					23	4.37	0.968974	0.585322	0.464321	0.0960921	0.920823	0.402463	0.333865	0.160037	1.023	0.84875	0.665603	0.0554485	1.10101	0.74411	0.665654	0.0943447	0.844436	0.0747999	0.260658	0.515517	1.08564	0.44851	0.434776	0.124755	1.06364	0.805364	0.805364	0.0576255	0.941674	0.172294	0.321485	0.301848	0.85325	0.0232085	0.483569
1331	MALDI-TOF/TOF (4800 Proteomics analyzer)	-	-	-	-	-	-	Unidentified 6					23	6.35	1.05403	0.417216	0.330967	0.154059	0.977723	0.626029	0.518311	0.0862083	1.13079	0.162491	0.361851	0.362229	0.958689	0.858142	0.767662	0.0722596	1.31062	0.0128267	0.260658	0.770071	1.01474	0.79954	0.772493	0.0581013	0.975704	0.763475	0.763475	0.0614006	1.10389	0.337375	0.321485	0.171789	1.28079	0.0035472	0.39999
1599	LC-MS/MS (Q-Exactive)	-	-	-	-	-	-	Unidentified 6					16	5.3	1.30537	0.0181905	0.157176	0.782904	1.70535	0.000175745	0.0232794	0.995027	1.02387	0.991618	0.777642	0.0500165	0.902094	0.886159	0.792725	0.0674558	0.849984	0.474573	0.304895	0.170772	0.917893	0.770305	0.744246	0.0607282	0.933027	0.623104	0.623104	0.080766	0.977886	0.696783	0.526253	0.0692105	0.87361	0.228844	0.483569
1541	Not collected 4	-	-	-	-	-	-	Not collected 5					18	4.38	1.05674	0.382788	0.319934	0.170972	1.10112	0.306175	0.333865	0.21652	1.01591	0.877919	0.688477	0.0535302	1.35844	0.0112691	0.430043	0.784107	0.894924	0.539126	0.346368	0.14822	1.24237	0.0117289	0.434776	0.778019	1.27776	0.00862573	0.293974	0.813056	0.928327	0.289072	0.321485	0.199828	1.01506	0.822716	0.816782
1569	Not collected 4	-	-	-	-	-	-	Not collected 5					17	4.7	1.34586	0.00511406	0.0811371	0.904117	1.65965	8.56652e-05	0.0221996	0.997586	1.13067	0.621605	0.487472	0.0871617	1.10353	0.847515	0.758156	0.0741406	0.762686	0.242574	0.260658	0.296191	1.0112	0.756553	0.73096	0.0621052	1.08183	0.563327	0.563327	0.0928208	1.00748	0.835473	0.631	0.0554091	0.813618	0.119695	0.483569
171	Not collected 4	-	-	-	-	-	-	Not collected 5					142	6.57	1.05803	0.340438	0.319934	0.195075	0.976238	0.704475	0.583259	0.0717631	1.14646	0.135623	0.361851	0.40484	1.25141	0.00601003	0.430043	0.843451	0.942984	0.810368	0.520631	0.0809858	1.2429	0.00141129	0.256347	0.94152	1.12013	0.0645231	0.457259	0.502799	0.995598	0.948995	0.716739	0.0505114	0.95454	0.596446	0.592144
1022	Not collected 4	-	-	-	-	-	-	Not collected 5					33	4.7	1.17331	0.00121244	0.0307776	0.966681	1.219	0.0045534	0.0716284	0.917208	1.12783	0.0819407	0.361851	0.520032	1.18697	0.03029	0.430043	0.660465	1.24406	0.0210901	0.260658	0.710142	1.0869	0.232621	0.434776	0.241454	1.18338	0.00788587	0.293974	0.822452	1.17734	0.0197855	0.321485	0.70794	1.17887	0.0142497	0.45605
1193	Not collected 4	-	-	-	-	-	-	Not collected 5					27	4	1.00733	0.69459	0.551001	0.073605	0.955468	0.534832	0.442806	0.109376	1.06075	0.967066	0.758388	0.0502546	0.952602	0.851054	0.761322	0.0735105	1.8369	0.0241494	0.260658	0.692148	0.999244	0.568183	0.548962	0.0917401	0.963665	0.761903	0.761903	0.0615585	1.72143	0.0063078	0.321485	0.844281	1.40976	0.122542	0.483569
1321	Not collected 4	-	-	-	-	-	-	Not collected 5					23	4.03	0.991054	0.9142	0.725212	0.0517551	0.894443	0.221836	0.333865	0.28914	1.10752	0.149093	0.361851	0.382544	0.951139	0.870649	0.778851	0.0700878	0.800311	0.0215349	0.260658	0.707416	0.960469	0.668889	0.646261	0.0731964	0.994084	0.95556	0.95556	0.050388	0.859559	0.0270691	0.321485	0.659552	0.834175	0.0113	0.45605
1337	Not collected 4	-	-	-	-	-	-	Not collected 5					23	4.2	1.00524	0.852513	0.676277	0.055237	1.02445	0.85087	0.704465	0.0552945	0.987951	0.942332	0.738991	0.0507816	0.949682	0.85876	0.768215	0.0721513	0.771766	0.0171858	0.260658	0.735979	1.04283	0.579339	0.559741	0.0893286	1.00602	0.798656	0.798656	0.0581749	0.795039	0.0049745	0.321485	0.865143	0.848882	0.0665278	0.483569
1375	Not collected 4	-	-	-	-	-	-	Not collected 5					22	4.52	0.926985	0.0688904	0.273245	0.556699	1.02108	0.810199	0.670791	0.0586582	0.844352	0.00827923	0.207766	0.873037	0.849974	0.0777271	0.430043	0.508778	0.84492	0.0414987	0.260658	0.613212	0.890852	0.0726527	0.434776	0.479275	0.880013	0.0371704	0.457259	0.60592	0.878184	0.0254383	0.321485	0.669518	0.884063	0.0344282	0.483569
1638	Not collected 4	-	-	-	-	-	-	Not collected 5					15	5.12	1.3399	0.022716	0.174814	0.752697	1.71207	0.0014945	0.0456075	0.965452	1.09821	0.725167	0.568687	0.0686643	0.97128	0.867997	0.776479	0.0705445	0.776689	0.328879	0.260658	0.238315	0.981335	0.604951	0.584487	0.0841503	1.00583	0.706437	0.706437	0.0679339	1.02525	0.79459	0.600123	0.058518	0.832254	0.159052	0.483569
1642	Not collected 4	-	-	-	-	-	-	Not collected 5					15	5.54	1.20333	0.0392902	0.218176	0.665209	1.40533	0.0010591	0.0456075	0.974135	1.05187	0.989688	0.776129	0.050025	0.977069	0.960804	0.859501	0.0556641	0.799366	0.355698	0.260658	0.223613	1.00182	0.966502	0.933806	0.0502203	0.98359	0.823912	0.823912	0.0562125	0.984425	0.653088	0.493252	0.0756591	0.83532	0.157016	0.483569
1 Spot no. were assigned by Progenesis SameSpots software according to their position in 2-DE gels
2 Maximum expression fold change induced by irradiation compared to CTRL
3 Maximum expression fold change induced by irradiation compared to the lower dose
4 p-values , False Discovery Rate adjusted p-value (q-values)and Power values were calculated using ANOVA test. p-values < 0.05 are in red text with a light red filling. q-values < 0.05 are in green text with a light green filling. Values of Power ≥ 0.8 are in yellow text with a light yellow filling.
4.11647e-05	p-value < 0.05
0.00306957	q-value < 0.05
0.998195	P > 0.8
5 Spot not collected due to too low an intensity on the preparative gel
6 Spot not identified due to a protein mix or too low a quantity
[truncated: 25 more columns]
